# Supplementary material for: A regulatory perspective on the systematic use of high-resolution mass spectrometry non-target screening data in environmental monitoring and chemicals management – use cases from the German NTSPortal
Source: Research Square preprint supplement (doi:10.21203/rs.3.rs-8436401/v1), 2025-12-31
Supplement: Supplementary file 1 [file f5d720935e92607d167d4f48.xlsx]

## Sheet: README
sheet	explanation
Exclusive_detects_per_dataset	Substances with CAS Number and InChIKey exclusively detected in the respective dataset over the entire observation period at all sites. spm: annual SPM samples, water_koblenz: daily water samples from Koblenz, water_saxony: water samples from Saxony.
annualSPM_processedHRMSNTS	Processed HRMS-NTS data from the NTSPortal for the annual SPM samples used in this study.
annualSPM_temporaltrend_GAM_GLM	Results of temporal trend analyses using GLMs and GAMs for substances detected in annual SPM samples with sufficient data points and discussed in the main text.
annualSPM_gain_loss_2006_2022	Gain (absent in 2006 and present in 2022), loss (present in 2006 and absent in 2022) and constant presence or absence of substances between 2006 and 2022 at 11 sites (E1, E2, E4, E5, Mu, R1, R3, R4, Sa, S1, S2) based on annual SPM samples. Presence is indicates as1 and absence as 0.
annualSPM_5th_WatchList	Overview of substances listed in the fifth watch list under the Water Framework Directive indicating matches in the CSL and detections in SPM and/or water samples. Total SPM stations: 15, total water station (Koblenz): 1, total water station (Saxony): 101.
annualSPM_UWWTDindicators	UWWTD indicator substances with information on matches in the CSL and detections in SPM and/or water samples. Total SPM stations: 15, total water station (Koblenz): 1, total water station (Saxony): 101.
annualSPM_presence_absence	Presence absence data of UWWTD related substances (HMP/VMP and cosmetics) from the NTSPortal detected in annual SPM samples in 2006 and 2022 at 11 sites (E1, E2, E4, E5, Mu, R1, R3, R4, Sa, S1, S2).
annualSPM_azolefungicides	EFSA azole fungicides (DOI: 10.2903/j.efsa.2025.9200) with information on matches in the CSL and detections in annual SPM samples.

## Sheet: Exclusive_detects_per_dataset
substance_name	cas	inchikey	source
(1,2-Diphenylpropyl)-trimethyl-ammonium		UAMJPHUIMPFLOK-UHFFFAOYSA-N	spm
(4-Chlorobenzyl)-triphenylphosphonium	1530-39-8	APCNUVQAZQVSLQ-UHFFFAOYSA-N	spm
1,4-Dihydroxyanthraquinone	81-64-1	GUEIZVNYDFNHJU-UHFFFAOYSA-N	spm
11alpha-Hydroxyprogesterone	80-75-1	BFZHCUBIASXHPK-ODYOLWGQSA-N	spm
2-(2-Hydroxyphenyl)-1H-benzimidazole	2963-66-8	IOJWAAXMYYMGMG-UHFFFAOYSA-N	spm
2-(2-Methoxyphenyl)-1H-Benzimidazole	6528-85-4	JNFBDHNAZPBWTF-UHFFFAOYSA-N	spm
2-(3-Hydroxyquinolin-2-yl)indene-1,3-dione	7576-65-0	FDTLQXNAPKJJAM-UHFFFAOYSA-N	spm
2-Benzyl-4-chlorophenol	120-32-1	NCKMMSIFQUPKCK-UHFFFAOYSA-N	spm
2-Benzyloxynaphthalene	613-62-7	WLTCCDHHWYAMCG-UHFFFAOYSA-N	spm
2-N-methyl-lamotrigine		ODYWNHAUROHCSD-UHFFFAOYSA-N	spm
3,5-Dibromo-4-hydroxybenzoic acid	3337-62-0	PHWAJJWKNLWZGJ-UHFFFAOYSA-N	spm
3,6-Dichloro-2-hydroxybenzoic acid	3401-80-7	FKIKPQHMWFZFEB-UHFFFAOYSA-N	spm
3-Alizarinsulfonic acid	83-61-4	JKYKXTRKURYNGW-UHFFFAOYSA-N	spm
4,4`-Bis(diethylamino)benzophenone	90-93-7	VYHBFRJRBHMIQZ-UHFFFAOYSA-N	spm
4-(2-Oxo-3-bornylidenemethyl)phenyl trimethylammonium	52793-97-2	QGISLNJSJIGSLZ-UHFFFAOYSA-N	spm
4-Aminosalicylic acid	65-49-6	WUBBRNOQWQTFEX-UHFFFAOYSA-N	spm
4-Ethoxybenzyltriphenylphosphonium	82105-88-2	QCMHSYZNHGLMAU-UHFFFAOYSA-N	spm
4-Methoxyphenol	150-76-5	NWVVVBRKAWDGAB-UHFFFAOYSA-N	spm
4-Methylbenzylidene camphor	36861-47-9	HEOCBCNFKCOKBX-UHFFFAOYSA-N	spm
Adipic acid	124-04-9	WNLRTRBMVRJNCN-UHFFFAOYSA-N	spm
Ametryn	834-12-8	RQVYBGPQFYCBGX-UHFFFAOYSA-N	spm
Amine-O	95-38-5	WGTDLPBPQKAPMN-MDZDMXLPSA-N	spm
Amiodarone	1951-25-3	IYIKLHRQXLHMJQ-UHFFFAOYSA-N	spm
Basic Red 1	3373-01-1	IWWWBRIIGAXLCJ-UHFFFAOYSA-N	spm
Benalaxyl	71626-11-4	CJPQIRJHIZUAQP-UHFFFAOYSA-N	spm
Benzenesulfonic acid	98-11-3	SRSXLGNVWSONIS-UHFFFAOYSA-N	spm
Benzethonium	10172-60-8	SIYLLGKDQZGJHK-UHFFFAOYSA-N	spm
Benzyl-(1-ethoxycarbonyl-undecyl)-dimethyl-ammonium		UBHDSOZILBGALL-UHFFFAOYSA-N	spm
Benzyl-dimethyl-octylammonium	46917-11-7	SHFLYPPECXRCFO-UHFFFAOYSA-N	spm
Benzyldimethyl(2-dodecyloxyethyl)-ammonium	194874-45-8	SWTCNSQVRSSFNN-UHFFFAOYSA-N	spm
Benzyldimethyl(hexadecylcarbamoylmethyl)ammonium	194874-48-1	JPYMIDLPHIHRNY-UHFFFAOYSA-O	spm
Benzyldimethyl(tetradecyl-carbamoylmethyl)ammonium	114801-97-7	YULONOFZPCZSJX-UHFFFAOYSA-O	spm
Benzylhexyldimethylammonium	22559-57-5	OCRHPUCRAFNCMN-UHFFFAOYSA-N	spm
Benzyltriphenylphosphonium	15853-35-7	BNQRPLGZFADFGA-UHFFFAOYSA-N	spm
Bephenium	7181-73-9	AVWWVJUMXRXPNF-UHFFFAOYSA-N	spm
Bis(perfluorohexyl)phosphinic acid sodium salt	70609-44-8	KJVRYSHRRDRBEW-UHFFFAOYSA-M	spm
Bis(tridecafluorohexyl)phosphinic acid	40143-77-9	NKHVPWOARFMIPG-UHFFFAOYSA-N	spm
Brilliant Green Cation	18198-35-1	HXCILVUBKWANLN-UHFFFAOYSA-N	spm
Carvedilol	72956-09-3	OGHNVEJMJSYVRP-UHFFFAOYSA-N	spm
Chlorhexidine	55-56-1	GHXZTYHSJHQHIJ-UHFFFAOYSA-N	spm
Chlorprothixene	113-59-7	WSPOMRSOLSGNFJ-AUWJEWJLSA-N	spm
Crystal Violet Cation	7438-46-2	LGLFFNDHMLKUMI-UHFFFAOYSA-N	spm
Cybutryne	28159-98-0	HDHLIWCXDDZUFH-UHFFFAOYSA-N	spm
Cyclopropyltriphenylphosphonium	14114-05-7	UMOWYCSSGJQQHE-UHFFFAOYSA-N	spm
Cyprodinil	121552-61-2	HAORKNGNJCEJBX-UHFFFAOYSA-N	spm
Decane-1-sulfonic acid	20283-21-0	KVGOXGQSTGQXDD-UHFFFAOYSA-N	spm
Didodecyl-dimethylammonium	13146-86-6	QQJDHWMADUVRDL-UHFFFAOYSA-N	spm
Difenoconazole	119446-68-3	BQYJATMQXGBDHF-UHFFFAOYSA-N	spm
Dihexadecyldimethylammonium	42187-36-0	SWSFKKWJEHRFFP-UHFFFAOYSA-N	spm
Diltiazem	42399-41-7	HSUGRBWQSSZJOP-RTWAWAEBSA-N	spm
Dronabinol	1972-08-3	CYQFCXCEBYINGO-UHFFFAOYSA-N	spm
Dronedarone	141626-36-0	ZQTNQVWKHCQYLQ-UHFFFAOYSA-N	spm
Econazole	27220-47-9	LEZWWPYKPKIXLL-UHFFFAOYSA-N	spm
Erlotinib	183321-74-6	AAKJLRGGTJKAMG-UHFFFAOYSA-N	spm
Fenbendazole	43210-67-9	HDDSHPAODJUKPD-UHFFFAOYSA-N	spm
Fenofibrate	49562-28-9	YMTINGFKWWXKFG-UHFFFAOYSA-N	spm
Flubendazole	31430-15-6	CPEUVMUXAHMANV-UHFFFAOYSA-N	spm
Flusilazole	85509-19-9	FQKUGOMFVDPBIZ-UHFFFAOYSA-N	spm
Haloperidol	52-86-8	LNEPOXFFQSENCJ-UHFFFAOYSA-N	spm
Hydroxychloroquine	118-42-3	XXSMGPRMXLTPCZ-UHFFFAOYSA-N	spm
Indigo	482-89-3	QQILFGKZUJYXGS-UHFFFAOYSA-N	spm
Isopentyltriphenylphosphonium	28322-40-9	QKMNVQGPFDVZTK-UHFFFAOYSA-N	spm
Isopropyltriphenylphosphonium	24470-78-8	PXIMQGSMXJFQOF-UHFFFAOYSA-N	spm
Leucomalachite green	129-73-7	WZKXBGJNNCGHIC-UHFFFAOYSA-N	spm
Loratadine	79794-75-5	JCCNYMKQOSZNPW-UHFFFAOYSA-N	spm
Malachite green cation	10309-95-2	VFCNQNZNPKRXIT-UHFFFAOYSA-N	spm
Mebendazole	31431-39-7	OPXLLQIJSORQAM-UHFFFAOYSA-N	spm
Mefloquine	53230-10-7	XEEQGYMUWCZPDN-UHFFFAOYSA-N	spm
Meptazinol	54340-58-8	JLICHNCFTLFZJN-UHFFFAOYSA-N	spm
Methyl 1,2,2,6,6-pentamethyl-4-piperidyl sebacate	82919-37-7	OTCWVYFQGYOYJO-UHFFFAOYSA-N	spm
Methyl-5-oxopyrrolidine-2-carboxylate	54571-66-3	HQGPKMSGXAUKHT-UHFFFAOYSA-N	spm
Methylbenzethonium	72013-76-4	ULBZAXDVMDGCJQ-UHFFFAOYSA-N	spm
Miconazole	22916-47-8	BYBLEWFAAKGYCD-UHFFFAOYSA-N	spm
Myristyl sulfate	4754-44-3	URLJMZWTXZTZRR-UHFFFAOYSA-N	spm
N-Ethyl-N-[(heptadecafluorooctyl)sulphonyl]glycine	2991-50-6	CKRXVVGETMYFIO-UHFFFAOYSA-N	spm
N-Methyldiethanolamine	105-59-9	CRVGTESFCCXCTH-UHFFFAOYSA-N	spm
Nafronyl	31329-57-4	KBAFPSLPKGSANY-UHFFFAOYSA-N	spm
Octrizole	3147-75-9	IYAZLDLPUNDVAG-UHFFFAOYSA-N	spm
Oleyltrimethylammonium	48074-73-3	QYWVQMLYIXYLRE-UHFFFAOYSA-N	spm
PAN-Sulfonate_C11		PLRPWVSWENVYGK-UHFFFAOYSA-N	spm
PAN-Sulfonate_C12		ISEHHTASEAVSBI-UHFFFAOYSA-N	spm
PAN-Sulfonate_C7		PXVJLADZHPMGEL-UHFFFAOYSA-N	spm
Perfluorodecanoic acid	335-76-2	PCIUEQPBYFRTEM-UHFFFAOYSA-N	spm
Prochloraz	67747-09-5	TVLSRXXIMLFWEO-UHFFFAOYSA-N	spm
Progesterone	57-83-0	RJKFOVLPORLFTN-LEKSSAKUSA-N	spm
Pyrimethanil	53112-28-0	ZLIBICFPKPWGIZ-UHFFFAOYSA-N	spm
Resorcinol bis(diphenyl phosphate)	57583-54-7	OWICEWMBIBPFAH-UHFFFAOYSA-N	spm
Sertaconazole	99592-32-2	JLGKQTAYUIMGRK-UHFFFAOYSA-N	spm
Sertraline	79617-96-2	VGKDLMBJGBXTGI-SJCJKPOMSA-N	spm
Simeton	673-04-1	HKAMKLBXTLTVCN-UHFFFAOYSA-N	spm
Syringic acid	530-57-4	JMSVCTWVEWCHDZ-UHFFFAOYSA-N	spm
Terbumeton	33693-04-8	BCQMBFHBDZVHKU-UHFFFAOYSA-N	spm
Trazodone	19794-93-5	PHLBKPHSAVXXEF-UHFFFAOYSA-N	spm
Tri(2-ethylhexyl)amine	1860-26-0	BZUDVELGTZDOIG-UHFFFAOYSA-N	spm
Trimipramine	739-71-9	ZSCDBOWYZJWBIY-UHFFFAOYSA-N	spm
Tris(4-methylphenyl) phosphate	78-32-0	BOSMZFBHAYFUBJ-UHFFFAOYSA-N	spm
2,4-Dichlorobenzoic acid	50-84-0	ATCRIUVQKHMXSH-UHFFFAOYSA-N	water_koblenz
3,5-Dichloro-4-hydroxybenzaldehyde	2314-36-5	LIYGCLJYTHRBQV-UHFFFAOYSA-N	water_koblenz
Pentachlorophenol	87-86-5	IZUPBVBPLAPZRR-UHFFFAOYSA-N	water_koblenz
4-(Trifluoromethyl)phenol	402-45-9	BAYGVMXZJBFEMB-UHFFFAOYSA-N	water_koblenz
Perfluorohexanoic acid	307-24-4	PXUULQAPEKKVAH-UHFFFAOYSA-N	water_koblenz
(Benzyloxycarbonylmethyl)triphenylphosphonium	78385-36-1	LFNHHHWATWJWMO-UHFFFAOYSA-N	water_koblenz
2-(Trifluoromethyl)benzamide	360-64-5	QBAYIBZITZBSFO-UHFFFAOYSA-N	water_koblenz
Azacyclonol	115-46-8	ZMISODWVFHHWNR-UHFFFAOYSA-N	water_koblenz
Benzohydroxamic acid	495-18-1	VDEUYMSGMPQMIK-UHFFFAOYSA-N	water_koblenz
Dioxypyramidon	519-65-3	IRTZMJWVZQYURE-UHFFFAOYSA-N	water_koblenz
Diphenyl(2,4,6-trimethylbenzoyl)phosphine oxide	75980-60-8	VFHVQBAGLAREND-UHFFFAOYSA-N	water_koblenz
Diphenylphosphine oxide	4559-70-0	ASUOLLHGALPRFK-UHFFFAOYSA-N	water_koblenz
Tripropyl phosphate	513-08-6	RXPQRKFMDQNODS-UHFFFAOYSA-N	water_koblenz
4-(2-Ethyl-6-methylphenyl)-5-methylmorpholin-3-one	120375-14-6	DVBDYPDVNRJKNJ-UHFFFAOYSA-N	water_koblenz
Diglyme	111-96-6	SBZXBUIDTXKZTM-UHFFFAOYSA-N	water_koblenz
2-Benzylimidazole	59-98-3	JIVZKJJQOZQXQB-UHFFFAOYSA-N	water_koblenz
2-Methoxyethyl-N-(3-aminophenyl)carbamate	1095601-63-0	ZBYDMKPFQILQOD-UHFFFAOYSA-N	water_koblenz
Ranitidine-S-oxide	73851-70-4	SKHXRNHSZTXSLP-UHFFFAOYSA-N	water_koblenz
Butyl-triphenylphosphonium	22444-89-9	BEVHTMLFDWFAQF-UHFFFAOYSA-N	water_koblenz
3,3,4,4,5,5,6,6,7,7,8,8,8-tridecafluorooctane-1-sulfonic acid	27619-97-2	VIONGDJUYAYOPU-UHFFFAOYSA-N	water_koblenz
4`-Methylacetanilide	103-89-9	YICAMJWHIUMFDI-UHFFFAOYSA-N	water_koblenz
N-Methylacetanilide	579-10-2	LMTGCJANOQOGPI-UHFFFAOYSA-N	water_koblenz
Alachlor	15972-60-8	XCSGPAVHZFQHGE-UHFFFAOYSA-N	water_koblenz
Acetochlor	34256-82-1	VTNQPKFIQCLBDU-UHFFFAOYSA-N	water_koblenz
Glimepiride	93479-97-1	WIGIZIANZCJQQY-RUCARUNLSA-N	water_koblenz
2-Isopropylthioxanthone	5495-84-1	KTALPKYXQZGAEG-UHFFFAOYSA-N	water_koblenz
2-Methyl-4`-(methylthio)-2-morpholinopropiophenone	71868-10-5	LWRBVKNFOYUCNP-UHFFFAOYSA-N	water_koblenz
(Methoxymethyl)diphenylphosphine oxide	4455-77-0	OEPKDBQOTLDTNC-UHFFFAOYSA-N	water_koblenz
Methyl 3-hydroxybenzoate	19438-10-9	YKUCHDXIBAQWSF-UHFFFAOYSA-N	water_koblenz
Perfluorooctanoic acid	335-67-1	SNGREZUHAYWORS-UHFFFAOYSA-N	water_koblenz
Trimethylphenylammonium	3426-74-2	ZNEOHLHCKGUAEB-UHFFFAOYSA-N	water_koblenz
[4(Acetyloxy)butyl](triphenyl)phosphonium	6191-70-4	UGDNEIBQZNPTEF-UHFFFAOYSA-N	water_koblenz
6-Acetylcodeine	6703-27-1	MFXFQKMUCYHPFQ-UHFFFAOYSA-N	water_koblenz
Flutriafol	76674-21-0	JWUCHKBSVLQQCO-UHFFFAOYSA-N	water_koblenz
Ethyl-N-(3-amino-2-methylphenyl)carbamate	1016755-26-2	CUARKGNESAJPQR-UHFFFAOYSA-N	water_koblenz
Triglyme	112-49-2	YFNKIDBQEZZDLK-UHFFFAOYSA-N	water_koblenz
1-Amino-3-phenoxy-2-propanol	4287-19-8	JZEHWMUIAKALDN-UHFFFAOYSA-N	water_koblenz
N-(2-Methoxyphenyl)acetamide	93-26-5	FGOFNVXHDGQVBG-UHFFFAOYSA-N	water_koblenz
3,3`-Dinitrobisphenol A	5329-21-5	LISYARSNTHASDG-UHFFFAOYSA-N	water_koblenz
Benzothiazole	95-16-9	IOJUPLGTWVMSFF-UHFFFAOYSA-N	water_koblenz
2-Aminobenzothiazole	136-95-8	UHGULLIUJBCTEF-UHFFFAOYSA-N	water_koblenz
Fexofenadin N-Oxid		NZZCEGUGWNGQJN-UHFFFAOYSA-N	water_koblenz
(4-Carboxybutyl)triphenylphosphonium	17814-85-6	CPVNCBJFUQQXSU-UHFFFAOYSA-O	water_koblenz
1,2-Benzisothiazol-3(2H)-one	2634-33-5	DMSMPAJRVJJAGA-UHFFFAOYSA-N	water_koblenz
Praziquantel	55268-74-1	FSVJFNAIGNNGKK-UHFFFAOYSA-N	water_koblenz
3,4,4,5,5,6,6,7,7,8,8,9,9,10,10,10-Hexadecafluorodec-2-enoic acid	70887-84-2	WHZXTVOEGZRRJM-UHFFFAOYSA-N	water_koblenz
Sulfadimethoxine	122-11-2	ZZORFUFYDOWNEF-UHFFFAOYSA-N	water_koblenz
Sulfadoxine	2447-57-6	PJSFRIWCGOHTNF-UHFFFAOYSA-N	water_koblenz
Acetochlor oxanilic acid	194992-44-4	OTKTUNJJKYTOFF-UHFFFAOYSA-N	water_koblenz
Lomefloxacin	98079-62-0	ZEKZLJVOYLTDKK-UHFFFAOYSA-N	water_koblenz
Methylecgonidine	43021-26-7	MPSNEAHFGOEKBI-UHFFFAOYSA-N	water_koblenz
2-Amino-n-isopropylbenzamide	30391-89-0	FWQYJOPJMIEKHZ-UHFFFAOYSA-N	water_koblenz
2-Ethyl-6-methylaniline	24549-06-2	JJVKJJNCIILLRP-UHFFFAOYSA-N	water_koblenz
Dihexyl phthalate	84-75-3	KCXZNSGUUQJJTR-UHFFFAOYSA-N	water_koblenz
N-[6-[formyl-(2,2,6,6-tetramethylpiperidin-4-yl)amino]hexyl]-N-(2,2,6,6-tetramethylpiperidin-4-yl)formamide	124172-53-8	UONLDZHKYCFZRW-UHFFFAOYSA-N	water_koblenz
2,2-Methylenbis(6-tert-butyl-4-ethyl-phenol)	88-24-4	GPNYZBKIGXGYNU-UHFFFAOYSA-N	water_koblenz
1-Butyl-1-methylpyrrolidinium	223437-10-3	PXELHGDYRQLRQO-UHFFFAOYSA-N	water_koblenz
Mesosulfuron-methyl	208465-21-8	NIFKBBMCXCMCAO-UHFFFAOYSA-N	water_koblenz
Hexamethylenediamine	124-09-4	NAQMVNRVTILPCV-UHFFFAOYSA-N	water_koblenz
trans-2-Hexenoic acid	13419-69-7	NIONDZDPPYHYKY-SNAWJCMRSA-N	water_koblenz
5-Methyl-5-phenylhydantoin	6843-49-8	JNGWGQUYLVSFND-UHFFFAOYSA-N	water_koblenz
Metronidazole-OH	4812-40-2	AEHPOYAOLCAMIU-UHFFFAOYSA-N	water_koblenz
5,6-Dimethyl-1H-benzotriazol	4184-79-6	MVPKIPGHRNIOPT-UHFFFAOYSA-N	water_koblenz
Dinoseb	88-85-7	OWZPCEFYPSAJFR-UHFFFAOYSA-N	water_koblenz
Aminophenazone	58-15-1	RMMXTBMQSGEXHJ-UHFFFAOYSA-N	water_koblenz
Aldicarb	116-06-3	QGLZXHRNAYXIBU-UHFFFAOYSA-N	water_koblenz
Clonidine	4205-90-7	GJSURZIOUXUGAL-UHFFFAOYSA-N	water_koblenz
2-Morpholin-4-yl-benzothiazole	4225-26-7	VVUVJGRVEYHIHC-UHFFFAOYSA-N	water_koblenz
Ethyl 4-dimethylaminobenzoate	10287-53-3	FZUGPQWGEGAKET-UHFFFAOYSA-N	water_koblenz
Perfluorohexanesulfonic acid	355-46-4	QZHDEAJFRJCDMF-UHFFFAOYSA-N	water_koblenz
2-ethoxyethyl (2Z)-2-cyano-2-[3-(3-methoxypropylamino)cyclohex-2-en-1-ylidene]acetate	1419401-88-9	NPNDSRGIZUPLNP-PEZBUJJGSA-N	water_koblenz
Prosulfuron	94125-34-5	LTUNNEGNEKBSEH-UHFFFAOYSA-N	water_koblenz
Tembotrione	335104-84-2	IUQAXCIUEPFPSF-UHFFFAOYSA-N	water_koblenz
Ethyl tosylcarbamate	5577-13-9	DFWQXANLGSXMKF-UHFFFAOYSA-N	water_koblenz
O-desmethyl-metoprolol	62572-94-5	CUKXSBOAIJILRY-UHFFFAOYSA-N	water_koblenz
Dimethachlor ESA	1231710-75-0	RVSCDWJKJDBFRS-UHFFFAOYSA-N	water_saxony
Metazachlor 479M004	1231244-60-2	PHMHHVKFXZNTKU-UHFFFAOYSA-N	water_saxony
Terbuthylazin SYN545666		SKWILWLBILDCEB-UHFFFAOYSA-N	water_saxony
Metolachlor SYN542489		HZWHUPBAPXSVDP-UHFFFAOYSA-N	water_saxony
Metolachlor OA	152019-73-3	LNOOSYCKMKZOJB-UHFFFAOYSA-N	water_saxony
Metolachlor SYN542490		PJFBPRJNNJJYAR-UHFFFAOYSA-N	water_saxony
Nicosulfuron ASDM	112006-75-4	WYFKZPLSYVJLRB-UHFFFAOYSA-N	water_saxony
Imazamox	114311-32-9	NUPJIGQFXCQJBK-UHFFFAOYSA-N	water_saxony
Levamisole	16595-80-5	HLFSDGLLUJUHTE-SNVBAGLBSA-N	water_saxony
Rosuvastatin	287714-41-4	BPRHUIZQVSMCRT-VEUZHWNKSA-N	water_saxony
4`-Hydroxydiclofenac	64118-84-9	KGVXVPRLBMWZLG-UHFFFAOYSA-N	water_saxony
Fipronil	120068-37-3	ZOCSXAVNDGMNBV-UHFFFAOYSA-N	water_saxony
Fenofibrinsaeure	42017-89-0	MQOBSOSZFYZQOK-UHFFFAOYSA-N	water_saxony
Alpha-hydroxy-metoprolol	56392-16-6	OFRYBPCSEMMZHR-UHFFFAOYSA-N	water_saxony
Milnacipran	92623-85-3	GJJFMKBJSRMPLA-UHFFFAOYSA-N	water_saxony
Indomethacin	53-86-1	CGIGDMFJXJATDK-UHFFFAOYSA-N	water_saxony
3,3`-Dimethoxybenzidine	119-90-4	JRBJSXQPQWSCCF-UHFFFAOYSA-N	water_saxony
Levetiracetam	102767-28-2	HPHUVLMMVZITSG-ZCFIWIBFSA-N	water_saxony
Noramidopyrine	519-98-2	JILCEWWZTBBOFS-UHFFFAOYSA-N	water_saxony
Urapidil	34661-75-1	ICMGLRUYEQNHPF-UHFFFAOYSA-N	water_saxony
Cocaine	50-36-2	ZPUCINDJVBIVPJ-UHFFFAOYSA-N	water_saxony
Febuxostat	144060-53-7	BQSJTQLCZDPROO-UHFFFAOYSA-N	water_saxony
Chlorthalonil R471811		NLCNUAPJCIAONV-UHFFFAOYSA-N	water_saxony
Nicosulfuron UCSN		DGJDFJVBNQLVJW-UHFFFAOYSA-N	water_saxony
Tribenzylphosphine oxide	4538-55-0	RDLZJCXTAYHYHX-UHFFFAOYSA-N	water_saxony
Fenuron	101-42-8	XXOYNJXVWVNOOJ-UHFFFAOYSA-N	water_saxony
Estrone sulfate	481-97-0	JKKFKPJIXZFSSB-UHFFFAOYSA-N	water_saxony
Tetrahydroharman-3-carboxylic acid	5470-37-1	ZUPHXNBLQCSEIA-UHFFFAOYSA-N	water_saxony
Fipronil sulfone	120068-36-2	LGHZJDKSVUTELU-UHFFFAOYSA-N	water_saxony
10,11-Dihydrocarbamazepine	3564-73-6	PHNLCHMJDSSPDQ-UHFFFAOYSA-N	water_saxony
Memantine	19982-08-2	BUGYDGFZZOZRHP-UHFFFAOYSA-N	water_saxony
Fluoxastrobin	361377-29-9	UFEODZBUAFNAEU-UHFFFAOYSA-N	water_saxony
Phenylbutazone	50-33-9	VYMDGNCVAMGZFE-UHFFFAOYSA-N	water_saxony
Benzbromarone	3562-84-3	WHQCHUCQKNIQEC-UHFFFAOYSA-N	water_saxony
Bupropion	34911-55-2	SNPPWIUOZRMYNY-UHFFFAOYSA-N	water_saxony
Chlormethiazole	533-45-9	PCLITLDOTJTVDJ-UHFFFAOYSA-N	water_saxony
Etoricoxib	202409-33-4	MNJVRJDLRVPLFE-UHFFFAOYSA-N	water_saxony
Flutolanil	66332-96-5	PTCGDEVVHUXTMP-UHFFFAOYSA-N	water_saxony
Ketorolac	74103-06-3	OZWKMVRBQXNZKK-UHFFFAOYSA-N	water_saxony
Pantoprazole Sulfone	127780-16-9	FCJYMBZQIJDMMM-UHFFFAOYSA-N	water_saxony
Quizalofop-P	94051-08-8	ABOOPXYCKNFDNJ-SNVBAGLBSA-N	water_saxony
5-Aminosalicylic acid	89-57-6	KBOPZPXVLCULAV-UHFFFAOYSA-N	water_saxony
Codeine	76-57-3	OROGSEYTTFOCAN-UHFFFAOYSA-N	water_saxony
Saccharin	81-07-2	CVHZOJJKTDOEJC-UHFFFAOYSA-N	water_saxony
Sulfadiazine	68-35-9	SEEPANYCNGTZFQ-UHFFFAOYSA-N	water_saxony
Hydroxyatenolol	68373-10-4	GSZUNNBDULASMA-UHFFFAOYSA-N	water_saxony
Isoproturon-desmethyl	34123-57-4	DOULWWSSZVEPIN-UHFFFAOYSA-N	water_saxony
Dimoxystrobin	149961-52-4	WXUZAHCNPWONDH-UHFFFAOYSA-N	water_saxony
2-N-methyl-lamotrigine		ODYWNHAUROHCSD-UHFFFAOYSA-N	water_saxony
Hydroxytorasemide	99300-68-2	WCYVLAMJCQZUCR-UHFFFAOYSA-N	water_saxony
Clomazone	81777-89-1	KIEDNEWSYUYDSN-UHFFFAOYSA-N	water_saxony
Lenacil	2164-08-1	ZTMKADLOSYKWCA-UHFFFAOYSA-N	water_saxony
1,3-Bis(2-methylphenyl)urea	617-07-2	WVYBLYKUAKXDLA-UHFFFAOYSA-N	water_saxony
7-Methylxanthine	552-62-5	PFWLFWPASULGAN-UHFFFAOYSA-N	water_saxony
2-(Piperidin-3-ylmethyl)pyrimidine	1063734-07-5	UPRVDXUSSMRSEP-UHFFFAOYSA-N	water_saxony
Hydrocortisone	50-23-7	JYGXADMDTFJGBT-VWUMJDOOSA-N	water_saxony
Ibuprofen carboxy acid	15935-54-3	DIVLBIVDYADZPL-UHFFFAOYSA-N	water_saxony
Amoxicillin	26787-78-0	LSQZJLSUYDQPKJ-NJBDSQKTSA-N	water_saxony
2-Phenyl-1H-benzimidazol-4-amine	313494-64-3	PVNHYDDCQMHWAL-UHFFFAOYSA-N	water_saxony
Pirimicarb	23103-98-2	YFGYUFNIOHWBOB-UHFFFAOYSA-N	water_saxony
Metconazole	125116-23-6	XWPZUHJBOLQNMN-UHFFFAOYSA-N	water_saxony
Ramiprilat	87269-97-4	KEDYTOTWMPBSLG-HILJTLORSA-N	water_saxony
Piperacillin	61477-96-1	IVBHGBMCVLDMKU-GXNBUGAJSA-N	water_saxony
Lisofylline	6493-06-7	NSMXQKNUPPXBRG-UHFFFAOYSA-N	water_saxony
Diflufenican AE B107137	36701-89-0	OBRGOFGSXWAVNZ-UHFFFAOYSA-N	water_saxony
Metalaxyl CGA108906	104390-56-9	WFTHOCDLKYPFJX-UHFFFAOYSA-N	water_saxony
Metobromuron	3060-89-7	WLFDQEVORAMCIM-UHFFFAOYSA-N	water_saxony
Fluopicolide	239110-15-7	GBOYJIHYACSLGN-UHFFFAOYSA-N	water_saxony
Benzylphosphonic acid	6881-57-8	OGBVRMYSNSKIEF-UHFFFAOYSA-N	water_saxony
Thiophanat-methyl	23564-05-8	QGHREAKMXXNCOA-UHFFFAOYSA-N	water_saxony
Dimethenamid M31		RZFZJWSRFOHTAL-UHFFFAOYSA-N	water_saxony
2-Amino-5-nitrophenol	121-88-0	DOPJTDJKZNWLRB-UHFFFAOYSA-N	water_saxony
Pindolol	13523-86-9	JZQKKSLKJUAGIC-UHFFFAOYSA-N	water_saxony
Acyclovir	59277-89-3	MKUXAQIIEYXACX-UHFFFAOYSA-N	water_saxony
Ampicillin	69-53-4	AVKUERGKIZMTKX-NJBDSQKTSA-N	water_saxony
Crotamiton	483-63-6	DNTGGZPQPQTDQF-UHFFFAOYSA-N	water_saxony
Metolachlor SYN542488		MQFPMRGMSDIXKQ-UHFFFAOYSA-N	water_saxony
Metolachlor SYN547969		IZDYJGUMTAAPSM-UHFFFAOYSA-N	water_saxony
Methacrylamidopropyltrimethylammonium	51441-64-6	VZTGWJFIMGVKSN-UHFFFAOYSA-O	water_saxony
Mandipropamid	374726-62-2	KWLVWJPJKJMCSH-UHFFFAOYSA-N	water_saxony
Pyrimethamine	58-14-0	WKSAUQYGYAYLPV-UHFFFAOYSA-N	water_saxony
4`-Aminoacetanilide	122-80-5	CHMBIJAOCISYEW-UHFFFAOYSA-N	water_saxony
Abacavir	136470-78-5	MCGSCOLBFJQGHM-SCZZXKLOSA-N	water_saxony
Fluazifop	69335-91-7	YUVKUEAFAVKILW-UHFFFAOYSA-N	water_saxony
Spirodiclofen-enol	148476-22-6	KIKARNYYJSEROI-UHFFFAOYSA-N	water_saxony
PAN-Sulfonate_C4		JICUJLIVFJSDNX-UHFFFAOYSA-N	water_saxony
Ametoctradin	865318-97-4	GGKQIOFASHYUJZ-UHFFFAOYSA-N	water_saxony
Metrafenone	220899-03-6	AMSPWOYQQAWRRM-UHFFFAOYSA-N	water_saxony
Pyraclostrobin	175013-18-0	HZRSNVGNWUDEFX-UHFFFAOYSA-N	water_saxony
Spirotetramat	203313-25-1	CLSVJBIHYWPGQY-UHFFFAOYSA-N	water_saxony
Terbuthylazin GS40436	36576-44-0	AXUUYNNVNOSTRP-UHFFFAOYSA-N	water_saxony
Enrofloxacin	93106-60-6	SPFYMRJSYKOXGV-UHFFFAOYSA-N	water_saxony
Norfloxacin	70458-96-7	OGJPXUAPXNRGGI-UHFFFAOYSA-N	water_saxony
2-Hydroxyestrone	362-06-1	SWINWPBPEKHUOD-JPVZDGGYSA-N	water_saxony
N,N-Dibenzylhydroxylamine	621-07-8	GXELTROTKVKZBQ-UHFFFAOYSA-N	water_saxony
Ciprofloxacin	85721-33-1	MYSWGUAQZAJSOK-UHFFFAOYSA-N	water_saxony
Beclomethasone	4419-39-0	NBMKJKDGKREAPL-UHFFFAOYSA-N	water_saxony
N,N-bis(ethoxycarbonyl)-4-methyl-1,3-phenylenediamine	7450-62-6	PHYURWGMBQTCSY-UHFFFAOYSA-N	water_saxony
Phenytoin	57-41-0	CXOFVDLJLONNDW-UHFFFAOYSA-N	water_saxony
Dihydrocodein	125-28-0	RBOXVHNMENFORY-DNJOTXNNSA-N	water_saxony
4-Hydroxy-1H-benzotriazole	26725-51-9	JMTMSDXUXJISAY-UHFFFAOYSA-N	water_saxony
2,3,5-Trimethylpyrazine	14667-55-1	IAEGWXHKWJGQAZ-UHFFFAOYSA-N	water_saxony
Tritosulfuron BH 635-3		VPHWAXAVJXQLJQ-UHFFFAOYSA-N	water_saxony
Tribenuron-methyl	101200-48-0	VLCQZHSMCYCDJL-UHFFFAOYSA-N	water_saxony
Phloretin	60-82-2	VGEREEWJJVICBM-UHFFFAOYSA-N	water_saxony
n-Butylparaben	94-26-8	QFOHBWFCKVYLES-UHFFFAOYSA-N	water_saxony
Chlortoluron-desmethyl	22175-22-0	GUMFWXBSFOHZDC-UHFFFAOYSA-N	water_saxony
3,5-Dichloro-4-hydroxybenzenesulfonic acid-candidate	25319-98-6	PGDCAFRJYQICAY-UHFFFAOYSA-N	water_saxony
2,4-Diaminoanisole	615-05-4	BAHPQISAXRFLCL-UHFFFAOYSA-N	water_saxony
7-Amino-4-methylcoumarin	26093-31-2	GLNDAGDHSLMOKX-UHFFFAOYSA-N	water_saxony
Metolachlor CGA 357704	1217465-10-5	IMFSUYMDPTXKCC-UHFFFAOYSA-N	water_saxony
14-Hydroxycodeinone	508-54-3	YYCRAERBSFHMPL-FSFXSCMFSA-N	water_saxony
MeFBSAA	159381-10-9	SKGBGOQHXBAKKO-UHFFFAOYSA-N	water_saxony
Bisoprolol M4	109791-18-6	AIGGWEPYIOOYLI-UHFFFAOYSA-N	water_saxony
2-Metyhl-4-isothiazolin-3-on	2682-20-4	BEGLCMHJXHIJLR-UHFFFAOYSA-N	water_saxony
C-desmethyl-metoprolol	109632-08-8	HYRRKPFGZHWUPQ-UHFFFAOYSA-N	water_saxony
Venlafaxine-N-oxide	1094598-37-4	LASJEFFANGIOGZ-UHFFFAOYSA-N	water_saxony
4-Hydroxytrimethoprim	112678-48-5	FYJKTYLNKCUCLP-UHFFFAOYSA-N	water_saxony
Ioxitalamic acid	28179-44-4	OLAOYPRJVHUHCF-UHFFFAOYSA-N	water_saxony
Sulfluramid	4151-50-2	CCEKAJIANROZEO-UHFFFAOYSA-N	water_saxony
(2-Phenyl-oxazol-4-yl)-methanol	59398-98-0	FSDBXQYHHCUEIE-UHFFFAOYSA-N	water_saxony
Napropamide	15299-99-7	WXZVAROIGSFCFJ-UHFFFAOYSA-N	water_saxony
Tributyl(1,3-dioxolan-2-ylmethyl)phosphonium	115754-62-6	UZFMTNNVUZWLQV-UHFFFAOYSA-N	water_saxony
Morantel	20574-50-9	NVEPPWDVLBMNMB-SNAWJCMRSA-N	water_saxony
1-Benzyl-3-methylimidazolium	52461-82-2	COSSPXYCRNRXRX-UHFFFAOYSA-N	water_saxony
Cyantraniliprol	736994-63-1	DVBUIBGJRQBEDP-UHFFFAOYSA-N	water_saxony
Flazasulfuron DTPU	178403-35-5	WIGINONAXQYKLJ-UHFFFAOYSA-N	water_saxony
4-amino-5-chloro-2-phenylpyridazin-3(2H)-one	1698-61-9	HAKJEHJYRKVCIU-UHFFFAOYSA-N	water_saxony
N-Isopropyl-N-phenyloxamic acid	70628-36-3	HYHJOUPYTUBFIX-UHFFFAOYSA-N	water_saxony
Nitenpyram	150824-47-8	CFRPSFYHXJZSBI-DHZHZOJOSA-N	water_saxony
Lincomycin	154-21-2	OJMMVQQUTAEWLP-UHFFFAOYSA-N	water_saxony
Capstone A	80475-32-7	KBDMGVIUNQWTND-UHFFFAOYSA-N	water_saxony
Tenofovir	147127-20-6	SGOIRFVFHAKUTI-ZCFIWIBFSA-N	water_saxony
Quetiapin	111974-69-7	URKOMYMAXPYINW-UHFFFAOYSA-N	water_saxony
Terbutaline	46719-29-3	XWTYSIMOBUGWOL-UHFFFAOYSA-N	water_saxony
Levetiracetam acid	102849-49-0	IODGAONBTQRGGG-LURJTMIESA-N	water_saxony
O-Desmethyl amisulpride	148516-54-5	XBIBUXBARDPHCJ-UHFFFAOYSA-N	water_saxony
Doxycycline	564-25-0	SGKRLCUYIXIAHR-UHFFFAOYSA-N	water_saxony
Benthiavalicarb-isopropyl	177406-68-7	USRKFGIXLGKMKU-ABAIWWIYSA-N	water_saxony
Emtricitabine carboxylic acid	1238210-10-0	GQHACZWRCOKKIZ-UHFFFAOYSA-N	water_saxony
(2-Nitrophenyl)-phosphoric triamide	874819-71-3	GDPVISFVPDYFPN-UHFFFAOYSA-N	water_saxony
4-Octylbenzenesulfonic acid	17012-98-5	MSOTUIWEAQEETA-UHFFFAOYSA-N	water_saxony

## Sheet: annualSPM_processedHRMSNTS
substance_name	CAS	Polarity	Year	station	duration	adduct	inchi	inchikey	triplicates_found	std_dev	normalized_peak_area_geometricmean	normalized_peak_area_mean	rel_std_dev	river	legislation_group
2-[(Dimethylamino)methyl]benzonitrile	53369-76-9	pos	2007	R4	365	[M+H]+	InChI=1S/C10H12N2/c1-12(2)8-10-6-4-3-5-9(10)7-11/h3-6H,8H2,1-2H3	LCBWEMRQKBKAEN-UHFFFAOYSA-N	2	0.0158843	0.0712212	0.0721014	22.0305	Rhine	other
2-[(Dimethylamino)methyl]benzonitrile	53369-76-9	pos	2014	R4	365	[M+H]+	InChI=1S/C10H12N2/c1-12(2)8-10-6-4-3-5-9(10)7-11/h3-6H,8H2,1-2H3	LCBWEMRQKBKAEN-UHFFFAOYSA-N	2	0.00172442	0.0370119	0.037032	4.65656	Rhine	other
2-[(Dimethylamino)methyl]benzonitrile	53369-76-9	pos	2014	R3	365	[M+H]+	InChI=1S/C10H12N2/c1-12(2)8-10-6-4-3-5-9(10)7-11/h3-6H,8H2,1-2H3	LCBWEMRQKBKAEN-UHFFFAOYSA-N	3	0.0133247	0.156883	0.157252	8.47348	Rhine	other
2-[(Dimethylamino)methyl]benzonitrile	53369-76-9	pos	2014	R1	365	[M+H]+	InChI=1S/C10H12N2/c1-12(2)8-10-6-4-3-5-9(10)7-11/h3-6H,8H2,1-2H3	LCBWEMRQKBKAEN-UHFFFAOYSA-N	3	0.274346	0.338534	0.399102	68.7409	Rhine	other
2-[(Dimethylamino)methyl]benzonitrile	53369-76-9	pos	2015	R3	365	[M+H]+	InChI=1S/C10H12N2/c1-12(2)8-10-6-4-3-5-9(10)7-11/h3-6H,8H2,1-2H3	LCBWEMRQKBKAEN-UHFFFAOYSA-N	3	0.0184184	0.178294	0.178923	10.294	Rhine	other
2-[(Dimethylamino)methyl]benzonitrile	53369-76-9	pos	2015	R1	365	[M+H]+	InChI=1S/C10H12N2/c1-12(2)8-10-6-4-3-5-9(10)7-11/h3-6H,8H2,1-2H3	LCBWEMRQKBKAEN-UHFFFAOYSA-N	2	0.0694738	0.28782	0.291983	23.7938	Rhine	other
2-[(Dimethylamino)methyl]benzonitrile	53369-76-9	pos	2016	R4	365	[M+H]+	InChI=1S/C10H12N2/c1-12(2)8-10-6-4-3-5-9(10)7-11/h3-6H,8H2,1-2H3	LCBWEMRQKBKAEN-UHFFFAOYSA-N	3	0.00213708	0.118344	0.118357	1.80563	Rhine	other
2-[(Dimethylamino)methyl]benzonitrile	53369-76-9	pos	2016	R3	365	[M+H]+	InChI=1S/C10H12N2/c1-12(2)8-10-6-4-3-5-9(10)7-11/h3-6H,8H2,1-2H3	LCBWEMRQKBKAEN-UHFFFAOYSA-N	3	0.0320529	0.459556	0.460321	6.96317	Rhine	other
2-[(Dimethylamino)methyl]benzonitrile	53369-76-9	pos	2016	R1	365	[M+H]+	InChI=1S/C10H12N2/c1-12(2)8-10-6-4-3-5-9(10)7-11/h3-6H,8H2,1-2H3	LCBWEMRQKBKAEN-UHFFFAOYSA-N	3	0.105903	0.852362	0.856817	12.36	Rhine	other
2-[(Dimethylamino)methyl]benzonitrile	53369-76-9	pos	2017	R4	365	[M+H]+	InChI=1S/C10H12N2/c1-12(2)8-10-6-4-3-5-9(10)7-11/h3-6H,8H2,1-2H3	LCBWEMRQKBKAEN-UHFFFAOYSA-N	3	0.0052163	0.100718	0.100808	5.17449	Rhine	other
2-[(Dimethylamino)methyl]benzonitrile	53369-76-9	pos	2017	R3	365	[M+H]+	InChI=1S/C10H12N2/c1-12(2)8-10-6-4-3-5-9(10)7-11/h3-6H,8H2,1-2H3	LCBWEMRQKBKAEN-UHFFFAOYSA-N	3	0.0663604	0.492901	0.495974	13.3798	Rhine	other
2-[(Dimethylamino)methyl]benzonitrile	53369-76-9	pos	2017	R1	365	[M+H]+	InChI=1S/C10H12N2/c1-12(2)8-10-6-4-3-5-9(10)7-11/h3-6H,8H2,1-2H3	LCBWEMRQKBKAEN-UHFFFAOYSA-N	3	0.32524	0.471282	0.561212	57.9532	Rhine	other
2-[(Dimethylamino)methyl]benzonitrile	53369-76-9	pos	2018	R4	365	[M+H]+	InChI=1S/C10H12N2/c1-12(2)8-10-6-4-3-5-9(10)7-11/h3-6H,8H2,1-2H3	LCBWEMRQKBKAEN-UHFFFAOYSA-N	3	0.00284547	0.0278356	0.0279326	10.1869	Rhine	other
2-[(Dimethylamino)methyl]benzonitrile	53369-76-9	pos	2018	R3	365	[M+H]+	InChI=1S/C10H12N2/c1-12(2)8-10-6-4-3-5-9(10)7-11/h3-6H,8H2,1-2H3	LCBWEMRQKBKAEN-UHFFFAOYSA-N	3	0.0112515	0.121663	0.122015	9.22138	Rhine	other
2-[(Dimethylamino)methyl]benzonitrile	53369-76-9	pos	2019	R3	365	[M+H]+	InChI=1S/C10H12N2/c1-12(2)8-10-6-4-3-5-9(10)7-11/h3-6H,8H2,1-2H3	LCBWEMRQKBKAEN-UHFFFAOYSA-N	3	0.107467	0.0898216	0.120594	89.1147	Rhine	other
2-[(Dimethylamino)methyl]benzonitrile	53369-76-9	pos	2019	R1	365	[M+H]+	InChI=1S/C10H12N2/c1-12(2)8-10-6-4-3-5-9(10)7-11/h3-6H,8H2,1-2H3	LCBWEMRQKBKAEN-UHFFFAOYSA-N	2	0.00561821	0.0457796	0.0459517	12.2263	Rhine	other
2-[(Dimethylamino)methyl]benzonitrile	53369-76-9	pos	2020	R4	365	[M+H]+	InChI=1S/C10H12N2/c1-12(2)8-10-6-4-3-5-9(10)7-11/h3-6H,8H2,1-2H3	LCBWEMRQKBKAEN-UHFFFAOYSA-N	2	0.00588397	0.0212083	0.0216126	27.2247	Rhine	other
2-[(Dimethylamino)methyl]benzonitrile	53369-76-9	pos	2022	R4	365	[M+H]+	InChI=1S/C10H12N2/c1-12(2)8-10-6-4-3-5-9(10)7-11/h3-6H,8H2,1-2H3	LCBWEMRQKBKAEN-UHFFFAOYSA-N	2	0.0028505	0.0139396	0.0140846	20.2384	Rhine	other
5-Methyl-1H-benzotriazole	136-85-6	neg	2006	S1	365	[M-H]-	InChI=1S/C7H7N3/c1-5-2-3-6-7(4-5)9-10-8-6/h2-4H,1H3,(H,8,9,10)	LRUDIIUSNGCQKF-UHFFFAOYSA-N	3	0.0163112	0.0138401	0.0180061	90.587	Saar	Industrial
5-Methyl-1H-benzotriazole	136-85-6	neg	2007	S1	365	[M-H]-	InChI=1S/C7H7N3/c1-5-2-3-6-7(4-5)9-10-8-6/h2-4H,1H3,(H,8,9,10)	LRUDIIUSNGCQKF-UHFFFAOYSA-N	3	0.0172703	0.0114311	0.0176445	97.8793	Saar	Industrial
5-Methyl-1H-benzotriazole	136-85-6	neg	2008	S1	365	[M-H]-	InChI=1S/C7H7N3/c1-5-2-3-6-7(4-5)9-10-8-6/h2-4H,1H3,(H,8,9,10)	LRUDIIUSNGCQKF-UHFFFAOYSA-N	2	0.0199372	0.0307576	0.0338346	58.9256	Saar	Industrial
5-Methyl-1H-benzotriazole	136-85-6	neg	2009	S1	365	[M-H]-	InChI=1S/C7H7N3/c1-5-2-3-6-7(4-5)9-10-8-6/h2-4H,1H3,(H,8,9,10)	LRUDIIUSNGCQKF-UHFFFAOYSA-N	3	0.0154574	0.0307943	0.032925	46.9473	Saar	Industrial
5-Methyl-1H-benzotriazole	136-85-6	neg	2010	S1	365	[M-H]-	InChI=1S/C7H7N3/c1-5-2-3-6-7(4-5)9-10-8-6/h2-4H,1H3,(H,8,9,10)	LRUDIIUSNGCQKF-UHFFFAOYSA-N	3	0.00803151	0.0199384	0.0209418	38.3516	Saar	Industrial
5-Methyl-1H-benzotriazole	136-85-6	neg	2011	S1	365	[M-H]-	InChI=1S/C7H7N3/c1-5-2-3-6-7(4-5)9-10-8-6/h2-4H,1H3,(H,8,9,10)	LRUDIIUSNGCQKF-UHFFFAOYSA-N	2	0.000397008	0.0123743	0.0123775	3.20749	Saar	Industrial
5-Methyl-1H-benzotriazole	136-85-6	neg	2012	S1	365	[M-H]-	InChI=1S/C7H7N3/c1-5-2-3-6-7(4-5)9-10-8-6/h2-4H,1H3,(H,8,9,10)	LRUDIIUSNGCQKF-UHFFFAOYSA-N	2	0.0070573	0.00630266	0.00803905	87.7878	Saar	Industrial
5-Methyl-1H-benzotriazole	136-85-6	neg	2013	S1	365	[M-H]-	InChI=1S/C7H7N3/c1-5-2-3-6-7(4-5)9-10-8-6/h2-4H,1H3,(H,8,9,10)	LRUDIIUSNGCQKF-UHFFFAOYSA-N	3	0.0175005	0.0198344	0.0235	74.4704	Saar	Industrial
5-Methyl-1H-benzotriazole	136-85-6	neg	2014	S1	365	[M-H]-	InChI=1S/C7H7N3/c1-5-2-3-6-7(4-5)9-10-8-6/h2-4H,1H3,(H,8,9,10)	LRUDIIUSNGCQKF-UHFFFAOYSA-N	3	0.0182925	0.0189982	0.0237261	77.0989	Saar	Industrial
5-Methyl-1H-benzotriazole	136-85-6	neg	2015	S1	365	[M-H]-	InChI=1S/C7H7N3/c1-5-2-3-6-7(4-5)9-10-8-6/h2-4H,1H3,(H,8,9,10)	LRUDIIUSNGCQKF-UHFFFAOYSA-N	3	0.0144467	0.0363593	0.0381433	37.8747	Saar	Industrial
5-Methyl-1H-benzotriazole	136-85-6	neg	2016	S1	365	[M-H]-	InChI=1S/C7H7N3/c1-5-2-3-6-7(4-5)9-10-8-6/h2-4H,1H3,(H,8,9,10)	LRUDIIUSNGCQKF-UHFFFAOYSA-N	3	0.00254887	0.16885	0.168863	1.50943	Saar	Industrial
5-Methyl-1H-benzotriazole	136-85-6	neg	2017	S1	365	[M-H]-	InChI=1S/C7H7N3/c1-5-2-3-6-7(4-5)9-10-8-6/h2-4H,1H3,(H,8,9,10)	LRUDIIUSNGCQKF-UHFFFAOYSA-N	3	0.00569107	0.136241	0.136319	4.17483	Saar	Industrial
5-Methyl-1H-benzotriazole	136-85-6	neg	2018	S1	365	[M-H]-	InChI=1S/C7H7N3/c1-5-2-3-6-7(4-5)9-10-8-6/h2-4H,1H3,(H,8,9,10)	LRUDIIUSNGCQKF-UHFFFAOYSA-N	3	0.0233896	0.102186	0.103817	22.5297	Saar	Industrial
5-Methyl-1H-benzotriazole	136-85-6	neg	2019	S1	365	[M-H]-	InChI=1S/C7H7N3/c1-5-2-3-6-7(4-5)9-10-8-6/h2-4H,1H3,(H,8,9,10)	LRUDIIUSNGCQKF-UHFFFAOYSA-N	3	0.00881818	0.0155122	0.0169606	51.9922	Saar	Industrial
5-Methyl-1H-benzotriazole	136-85-6	neg	2020	S1	365	[M-H]-	InChI=1S/C7H7N3/c1-5-2-3-6-7(4-5)9-10-8-6/h2-4H,1H3,(H,8,9,10)	LRUDIIUSNGCQKF-UHFFFAOYSA-N	3	0.00997028	0.016367	0.0179615	55.5091	Saar	Industrial
5-Methyl-1H-benzotriazole	136-85-6	neg	2022	S1	365	[M-H]-	InChI=1S/C7H7N3/c1-5-2-3-6-7(4-5)9-10-8-6/h2-4H,1H3,(H,8,9,10)	LRUDIIUSNGCQKF-UHFFFAOYSA-N	3	0.00682709	0.0253978	0.025969	26.2893	Saar	Industrial
5-Methyl-1H-benzotriazole	136-85-6	pos	2005	E5	365	[M+H]+	InChI=1S/C7H7N3/c1-5-2-3-6-7(4-5)9-10-8-6/h2-4H,1H3,(H,8,9,10)	LRUDIIUSNGCQKF-UHFFFAOYSA-N	3	0.0212203	0.0349972	0.039432	53.8149	Elbe	Industrial
5-Methyl-1H-benzotriazole	136-85-6	pos	2005	E4	365	[M+H]+	InChI=1S/C7H7N3/c1-5-2-3-6-7(4-5)9-10-8-6/h2-4H,1H3,(H,8,9,10)	LRUDIIUSNGCQKF-UHFFFAOYSA-N	2	0.0175768	0.0160539	0.0203027	86.5738	Elbe	Industrial
5-Methyl-1H-benzotriazole	136-85-6	pos	2005	E1	365	[M+H]+	InChI=1S/C7H7N3/c1-5-2-3-6-7(4-5)9-10-8-6/h2-4H,1H3,(H,8,9,10)	LRUDIIUSNGCQKF-UHFFFAOYSA-N	3	0.014281	0.153078	0.153528	9.30191	Elbe	Industrial
5-Methyl-1H-benzotriazole	136-85-6	pos	2005	E2	365	[M+H]+	InChI=1S/C7H7N3/c1-5-2-3-6-7(4-5)9-10-8-6/h2-4H,1H3,(H,8,9,10)	LRUDIIUSNGCQKF-UHFFFAOYSA-N	3	0.0291972	0.109133	0.111737	26.1302	Elbe	Industrial
5-Methyl-1H-benzotriazole	136-85-6	pos	2005	Mu	365	[M+H]+	InChI=1S/C7H7N3/c1-5-2-3-6-7(4-5)9-10-8-6/h2-4H,1H3,(H,8,9,10)	LRUDIIUSNGCQKF-UHFFFAOYSA-N	3	0.0248444	0.0515201	0.0548594	45.2875	Mulde	Industrial
5-Methyl-1H-benzotriazole	136-85-6	pos	2005	R4	365	[M+H]+	InChI=1S/C7H7N3/c1-5-2-3-6-7(4-5)9-10-8-6/h2-4H,1H3,(H,8,9,10)	LRUDIIUSNGCQKF-UHFFFAOYSA-N	3	0.00777382	0.0871302	0.087354	8.89922	Rhine	Industrial
5-Methyl-1H-benzotriazole	136-85-6	pos	2005	R3	365	[M+H]+	InChI=1S/C7H7N3/c1-5-2-3-6-7(4-5)9-10-8-6/h2-4H,1H3,(H,8,9,10)	LRUDIIUSNGCQKF-UHFFFAOYSA-N	3	0.0128881	0.121209	0.121682	10.5917	Rhine	Industrial
5-Methyl-1H-benzotriazole	136-85-6	pos	2005	Sa	365	[M+H]+	InChI=1S/C7H7N3/c1-5-2-3-6-7(4-5)9-10-8-6/h2-4H,1H3,(H,8,9,10)	LRUDIIUSNGCQKF-UHFFFAOYSA-N	3	0.048256	0.268083	0.27114	17.7974	Saale	Industrial
5-Methyl-1H-benzotriazole	136-85-6	pos	2006	E5	365	[M+H]+	InChI=1S/C7H7N3/c1-5-2-3-6-7(4-5)9-10-8-6/h2-4H,1H3,(H,8,9,10)	LRUDIIUSNGCQKF-UHFFFAOYSA-N	3	0.036065	0.305412	0.30677	11.7564	Elbe	Industrial
5-Methyl-1H-benzotriazole	136-85-6	pos	2006	E1	365	[M+H]+	InChI=1S/C7H7N3/c1-5-2-3-6-7(4-5)9-10-8-6/h2-4H,1H3,(H,8,9,10)	LRUDIIUSNGCQKF-UHFFFAOYSA-N	3	0.0381976	0.157079	0.160353	23.8209	Elbe	Industrial
5-Methyl-1H-benzotriazole	136-85-6	pos	2006	E2	365	[M+H]+	InChI=1S/C7H7N3/c1-5-2-3-6-7(4-5)9-10-8-6/h2-4H,1H3,(H,8,9,10)	LRUDIIUSNGCQKF-UHFFFAOYSA-N	3	0.00353939	0.0673644	0.0674257	5.24932	Elbe	Industrial
5-Methyl-1H-benzotriazole	136-85-6	pos	2006	Mu	365	[M+H]+	InChI=1S/C7H7N3/c1-5-2-3-6-7(4-5)9-10-8-6/h2-4H,1H3,(H,8,9,10)	LRUDIIUSNGCQKF-UHFFFAOYSA-N	2	0.0410778	0.0584494	0.0652689	62.9362	Mulde	Industrial
5-Methyl-1H-benzotriazole	136-85-6	pos	2006	R4	365	[M+H]+	InChI=1S/C7H7N3/c1-5-2-3-6-7(4-5)9-10-8-6/h2-4H,1H3,(H,8,9,10)	LRUDIIUSNGCQKF-UHFFFAOYSA-N	3	0.0165544	0.112138	0.112992	14.6509	Rhine	Industrial
5-Methyl-1H-benzotriazole	136-85-6	pos	2006	R3	365	[M+H]+	InChI=1S/C7H7N3/c1-5-2-3-6-7(4-5)9-10-8-6/h2-4H,1H3,(H,8,9,10)	LRUDIIUSNGCQKF-UHFFFAOYSA-N	3	0.0178609	0.125132	0.126026	14.1723	Rhine	Industrial
5-Methyl-1H-benzotriazole	136-85-6	pos	2006	Sa	365	[M+H]+	InChI=1S/C7H7N3/c1-5-2-3-6-7(4-5)9-10-8-6/h2-4H,1H3,(H,8,9,10)	LRUDIIUSNGCQKF-UHFFFAOYSA-N	3	0.0308858	0.1789	0.180595	17.1023	Saale	Industrial
5-Methyl-1H-benzotriazole	136-85-6	pos	2006	S1	365	[M+H]+	InChI=1S/C7H7N3/c1-5-2-3-6-7(4-5)9-10-8-6/h2-4H,1H3,(H,8,9,10)	LRUDIIUSNGCQKF-UHFFFAOYSA-N	3	0.0522694	0.221858	0.225597	23.1694	Saar	Industrial
5-Methyl-1H-benzotriazole	136-85-6	pos	2006	S2	365	[M+H]+	InChI=1S/C7H7N3/c1-5-2-3-6-7(4-5)9-10-8-6/h2-4H,1H3,(H,8,9,10)	LRUDIIUSNGCQKF-UHFFFAOYSA-N	3	0.0482213	3.56376	3.56398	1.35302	Saar	Industrial
5-Methyl-1H-benzotriazole	136-85-6	pos	2007	E5	365	[M+H]+	InChI=1S/C7H7N3/c1-5-2-3-6-7(4-5)9-10-8-6/h2-4H,1H3,(H,8,9,10)	LRUDIIUSNGCQKF-UHFFFAOYSA-N	3	0.00738009	0.247262	0.247334	2.98385	Elbe	Industrial
5-Methyl-1H-benzotriazole	136-85-6	pos	2007	E4	365	[M+H]+	InChI=1S/C7H7N3/c1-5-2-3-6-7(4-5)9-10-8-6/h2-4H,1H3,(H,8,9,10)	LRUDIIUSNGCQKF-UHFFFAOYSA-N	3	0.086291	0.0635758	0.0875586	98.5522	Elbe	Industrial
5-Methyl-1H-benzotriazole	136-85-6	pos	2007	E1	365	[M+H]+	InChI=1S/C7H7N3/c1-5-2-3-6-7(4-5)9-10-8-6/h2-4H,1H3,(H,8,9,10)	LRUDIIUSNGCQKF-UHFFFAOYSA-N	3	0.0329556	0.280355	0.281667	11.7002	Elbe	Industrial
5-Methyl-1H-benzotriazole	136-85-6	pos	2007	E2	365	[M+H]+	InChI=1S/C7H7N3/c1-5-2-3-6-7(4-5)9-10-8-6/h2-4H,1H3,(H,8,9,10)	LRUDIIUSNGCQKF-UHFFFAOYSA-N	3	0.0286327	0.149272	0.15117	18.9408	Elbe	Industrial
5-Methyl-1H-benzotriazole	136-85-6	pos	2007	Mu	365	[M+H]+	InChI=1S/C7H7N3/c1-5-2-3-6-7(4-5)9-10-8-6/h2-4H,1H3,(H,8,9,10)	LRUDIIUSNGCQKF-UHFFFAOYSA-N	3	0.0449767	0.0618685	0.0709229	63.4163	Mulde	Industrial
5-Methyl-1H-benzotriazole	136-85-6	pos	2007	R4	365	[M+H]+	InChI=1S/C7H7N3/c1-5-2-3-6-7(4-5)9-10-8-6/h2-4H,1H3,(H,8,9,10)	LRUDIIUSNGCQKF-UHFFFAOYSA-N	3	0.0161937	0.101151	0.10197	15.8808	Rhine	Industrial
5-Methyl-1H-benzotriazole	136-85-6	pos	2007	R3	365	[M+H]+	InChI=1S/C7H7N3/c1-5-2-3-6-7(4-5)9-10-8-6/h2-4H,1H3,(H,8,9,10)	LRUDIIUSNGCQKF-UHFFFAOYSA-N	3	0.00330224	0.135739	0.135766	2.43231	Rhine	Industrial
5-Methyl-1H-benzotriazole	136-85-6	pos	2007	Sa	365	[M+H]+	InChI=1S/C7H7N3/c1-5-2-3-6-7(4-5)9-10-8-6/h2-4H,1H3,(H,8,9,10)	LRUDIIUSNGCQKF-UHFFFAOYSA-N	3	0.0468334	0.149773	0.154163	30.3792	Saale	Industrial
5-Methyl-1H-benzotriazole	136-85-6	pos	2007	S1	365	[M+H]+	InChI=1S/C7H7N3/c1-5-2-3-6-7(4-5)9-10-8-6/h2-4H,1H3,(H,8,9,10)	LRUDIIUSNGCQKF-UHFFFAOYSA-N	3	0.0798536	0.195676	0.206967	38.5829	Saar	Industrial
5-Methyl-1H-benzotriazole	136-85-6	pos	2007	S2	365	[M+H]+	InChI=1S/C7H7N3/c1-5-2-3-6-7(4-5)9-10-8-6/h2-4H,1H3,(H,8,9,10)	LRUDIIUSNGCQKF-UHFFFAOYSA-N	3	0.0769845	1.27837	1.27995	6.01465	Saar	Industrial
5-Methyl-1H-benzotriazole	136-85-6	pos	2008	E5	365	[M+H]+	InChI=1S/C7H7N3/c1-5-2-3-6-7(4-5)9-10-8-6/h2-4H,1H3,(H,8,9,10)	LRUDIIUSNGCQKF-UHFFFAOYSA-N	3	0.0315622	0.329792	0.330826	9.54042	Elbe	Industrial
5-Methyl-1H-benzotriazole	136-85-6	pos	2008	E4	365	[M+H]+	InChI=1S/C7H7N3/c1-5-2-3-6-7(4-5)9-10-8-6/h2-4H,1H3,(H,8,9,10)	LRUDIIUSNGCQKF-UHFFFAOYSA-N	2	0.0050722	0.0320649	0.0322649	15.7205	Elbe	Industrial
5-Methyl-1H-benzotriazole	136-85-6	pos	2008	E1	365	[M+H]+	InChI=1S/C7H7N3/c1-5-2-3-6-7(4-5)9-10-8-6/h2-4H,1H3,(H,8,9,10)	LRUDIIUSNGCQKF-UHFFFAOYSA-N	3	0.0474936	0.251917	0.254981	18.6263	Elbe	Industrial
5-Methyl-1H-benzotriazole	136-85-6	pos	2008	E2	365	[M+H]+	InChI=1S/C7H7N3/c1-5-2-3-6-7(4-5)9-10-8-6/h2-4H,1H3,(H,8,9,10)	LRUDIIUSNGCQKF-UHFFFAOYSA-N	3	0.0137394	0.165813	0.166203	8.2666	Elbe	Industrial
5-Methyl-1H-benzotriazole	136-85-6	pos	2008	Mu	365	[M+H]+	InChI=1S/C7H7N3/c1-5-2-3-6-7(4-5)9-10-8-6/h2-4H,1H3,(H,8,9,10)	LRUDIIUSNGCQKF-UHFFFAOYSA-N	3	0.0555358	0.0661892	0.0773615	71.7874	Mulde	Industrial
5-Methyl-1H-benzotriazole	136-85-6	pos	2008	R4	365	[M+H]+	InChI=1S/C7H7N3/c1-5-2-3-6-7(4-5)9-10-8-6/h2-4H,1H3,(H,8,9,10)	LRUDIIUSNGCQKF-UHFFFAOYSA-N	3	0.0314201	0.0797461	0.0833117	37.7139	Rhine	Industrial
5-Methyl-1H-benzotriazole	136-85-6	pos	2008	R3	365	[M+H]+	InChI=1S/C7H7N3/c1-5-2-3-6-7(4-5)9-10-8-6/h2-4H,1H3,(H,8,9,10)	LRUDIIUSNGCQKF-UHFFFAOYSA-N	3	0.0205654	0.191348	0.192081	10.7066	Rhine	Industrial
5-Methyl-1H-benzotriazole	136-85-6	pos	2008	Sa	365	[M+H]+	InChI=1S/C7H7N3/c1-5-2-3-6-7(4-5)9-10-8-6/h2-4H,1H3,(H,8,9,10)	LRUDIIUSNGCQKF-UHFFFAOYSA-N	3	0.095117	0.1485	0.16427	57.9029	Saale	Industrial
5-Methyl-1H-benzotriazole	136-85-6	pos	2008	S1	365	[M+H]+	InChI=1S/C7H7N3/c1-5-2-3-6-7(4-5)9-10-8-6/h2-4H,1H3,(H,8,9,10)	LRUDIIUSNGCQKF-UHFFFAOYSA-N	3	0.106826	0.29649	0.307753	34.7116	Saar	Industrial
5-Methyl-1H-benzotriazole	136-85-6	pos	2008	S2	365	[M+H]+	InChI=1S/C7H7N3/c1-5-2-3-6-7(4-5)9-10-8-6/h2-4H,1H3,(H,8,9,10)	LRUDIIUSNGCQKF-UHFFFAOYSA-N	3	0.677316	0.714315	0.905485	74.8015	Saar	Industrial
5-Methyl-1H-benzotriazole	136-85-6	pos	2009	E5	365	[M+H]+	InChI=1S/C7H7N3/c1-5-2-3-6-7(4-5)9-10-8-6/h2-4H,1H3,(H,8,9,10)	LRUDIIUSNGCQKF-UHFFFAOYSA-N	3	0.0296446	0.391494	0.392228	7.55799	Elbe	Industrial
5-Methyl-1H-benzotriazole	136-85-6	pos	2009	E4	365	[M+H]+	InChI=1S/C7H7N3/c1-5-2-3-6-7(4-5)9-10-8-6/h2-4H,1H3,(H,8,9,10)	LRUDIIUSNGCQKF-UHFFFAOYSA-N	2	0.00307934	0.0376102	0.0376731	8.17383	Elbe	Industrial
5-Methyl-1H-benzotriazole	136-85-6	pos	2009	E1	365	[M+H]+	InChI=1S/C7H7N3/c1-5-2-3-6-7(4-5)9-10-8-6/h2-4H,1H3,(H,8,9,10)	LRUDIIUSNGCQKF-UHFFFAOYSA-N	3	0.040992	0.289287	0.291319	14.0712	Elbe	Industrial
5-Methyl-1H-benzotriazole	136-85-6	pos	2009	E2	365	[M+H]+	InChI=1S/C7H7N3/c1-5-2-3-6-7(4-5)9-10-8-6/h2-4H,1H3,(H,8,9,10)	LRUDIIUSNGCQKF-UHFFFAOYSA-N	3	0.0389729	0.194857	0.19733	19.7501	Elbe	Industrial
5-Methyl-1H-benzotriazole	136-85-6	pos	2009	Mu	365	[M+H]+	InChI=1S/C7H7N3/c1-5-2-3-6-7(4-5)9-10-8-6/h2-4H,1H3,(H,8,9,10)	LRUDIIUSNGCQKF-UHFFFAOYSA-N	3	0.134822	0.201812	0.234364	57.5265	Mulde	Industrial
5-Methyl-1H-benzotriazole	136-85-6	pos	2009	R4	365	[M+H]+	InChI=1S/C7H7N3/c1-5-2-3-6-7(4-5)9-10-8-6/h2-4H,1H3,(H,8,9,10)	LRUDIIUSNGCQKF-UHFFFAOYSA-N	3	0.0157219	0.102539	0.103352	15.212	Rhine	Industrial
5-Methyl-1H-benzotriazole	136-85-6	pos	2009	R3	365	[M+H]+	InChI=1S/C7H7N3/c1-5-2-3-6-7(4-5)9-10-8-6/h2-4H,1H3,(H,8,9,10)	LRUDIIUSNGCQKF-UHFFFAOYSA-N	3	0.0140811	0.219739	0.220034	6.39951	Rhine	Industrial
5-Methyl-1H-benzotriazole	136-85-6	pos	2009	Sa	365	[M+H]+	InChI=1S/C7H7N3/c1-5-2-3-6-7(4-5)9-10-8-6/h2-4H,1H3,(H,8,9,10)	LRUDIIUSNGCQKF-UHFFFAOYSA-N	3	0.148089	0.339201	0.360776	41.0473	Saale	Industrial
5-Methyl-1H-benzotriazole	136-85-6	pos	2009	S1	365	[M+H]+	InChI=1S/C7H7N3/c1-5-2-3-6-7(4-5)9-10-8-6/h2-4H,1H3,(H,8,9,10)	LRUDIIUSNGCQKF-UHFFFAOYSA-N	3	0.126083	0.430752	0.441726	28.5432	Saar	Industrial
5-Methyl-1H-benzotriazole	136-85-6	pos	2009	S2	365	[M+H]+	InChI=1S/C7H7N3/c1-5-2-3-6-7(4-5)9-10-8-6/h2-4H,1H3,(H,8,9,10)	LRUDIIUSNGCQKF-UHFFFAOYSA-N	3	0.290238	1.47404	1.49395	19.4276	Saar	Industrial
5-Methyl-1H-benzotriazole	136-85-6	pos	2010	E5	365	[M+H]+	InChI=1S/C7H7N3/c1-5-2-3-6-7(4-5)9-10-8-6/h2-4H,1H3,(H,8,9,10)	LRUDIIUSNGCQKF-UHFFFAOYSA-N	3	0.0422652	0.321494	0.323364	13.0705	Elbe	Industrial
5-Methyl-1H-benzotriazole	136-85-6	pos	2010	E4	365	[M+H]+	InChI=1S/C7H7N3/c1-5-2-3-6-7(4-5)9-10-8-6/h2-4H,1H3,(H,8,9,10)	LRUDIIUSNGCQKF-UHFFFAOYSA-N	3	0.0629929	0.0571479	0.0739209	85.2166	Elbe	Industrial
5-Methyl-1H-benzotriazole	136-85-6	pos	2010	E1	365	[M+H]+	InChI=1S/C7H7N3/c1-5-2-3-6-7(4-5)9-10-8-6/h2-4H,1H3,(H,8,9,10)	LRUDIIUSNGCQKF-UHFFFAOYSA-N	3	0.0478334	0.185834	0.189878	25.1917	Elbe	Industrial
5-Methyl-1H-benzotriazole	136-85-6	pos	2010	E2	365	[M+H]+	InChI=1S/C7H7N3/c1-5-2-3-6-7(4-5)9-10-8-6/h2-4H,1H3,(H,8,9,10)	LRUDIIUSNGCQKF-UHFFFAOYSA-N	3	0.0062048	0.111945	0.11206	5.53704	Elbe	Industrial
5-Methyl-1H-benzotriazole	136-85-6	pos	2010	Mu	365	[M+H]+	InChI=1S/C7H7N3/c1-5-2-3-6-7(4-5)9-10-8-6/h2-4H,1H3,(H,8,9,10)	LRUDIIUSNGCQKF-UHFFFAOYSA-N	3	0.0926704	0.157686	0.175577	52.7805	Mulde	Industrial
5-Methyl-1H-benzotriazole	136-85-6	pos	2010	R4	365	[M+H]+	InChI=1S/C7H7N3/c1-5-2-3-6-7(4-5)9-10-8-6/h2-4H,1H3,(H,8,9,10)	LRUDIIUSNGCQKF-UHFFFAOYSA-N	3	0.00713885	0.123313	0.12345	5.78279	Rhine	Industrial
5-Methyl-1H-benzotriazole	136-85-6	pos	2010	R3	365	[M+H]+	InChI=1S/C7H7N3/c1-5-2-3-6-7(4-5)9-10-8-6/h2-4H,1H3,(H,8,9,10)	LRUDIIUSNGCQKF-UHFFFAOYSA-N	3	0.0346677	0.237392	0.238993	14.5058	Rhine	Industrial
5-Methyl-1H-benzotriazole	136-85-6	pos	2010	Sa	365	[M+H]+	InChI=1S/C7H7N3/c1-5-2-3-6-7(4-5)9-10-8-6/h2-4H,1H3,(H,8,9,10)	LRUDIIUSNGCQKF-UHFFFAOYSA-N	3	0.0512434	0.277244	0.28025	18.2849	Saale	Industrial
5-Methyl-1H-benzotriazole	136-85-6	pos	2010	S1	365	[M+H]+	InChI=1S/C7H7N3/c1-5-2-3-6-7(4-5)9-10-8-6/h2-4H,1H3,(H,8,9,10)	LRUDIIUSNGCQKF-UHFFFAOYSA-N	3	0.0279022	0.23401	0.235114	11.8675	Saar	Industrial
5-Methyl-1H-benzotriazole	136-85-6	pos	2010	S2	365	[M+H]+	InChI=1S/C7H7N3/c1-5-2-3-6-7(4-5)9-10-8-6/h2-4H,1H3,(H,8,9,10)	LRUDIIUSNGCQKF-UHFFFAOYSA-N	3	0.193337	1.56021	1.56784	12.3315	Saar	Industrial
5-Methyl-1H-benzotriazole	136-85-6	pos	2011	E5	365	[M+H]+	InChI=1S/C7H7N3/c1-5-2-3-6-7(4-5)9-10-8-6/h2-4H,1H3,(H,8,9,10)	LRUDIIUSNGCQKF-UHFFFAOYSA-N	3	0.0198965	0.260212	0.260722	7.63134	Elbe	Industrial
5-Methyl-1H-benzotriazole	136-85-6	pos	2011	E4	365	[M+H]+	InChI=1S/C7H7N3/c1-5-2-3-6-7(4-5)9-10-8-6/h2-4H,1H3,(H,8,9,10)	LRUDIIUSNGCQKF-UHFFFAOYSA-N	3	0.0330985	0.040592	0.0472647	70.0279	Elbe	Industrial
5-Methyl-1H-benzotriazole	136-85-6	pos	2011	E1	365	[M+H]+	InChI=1S/C7H7N3/c1-5-2-3-6-7(4-5)9-10-8-6/h2-4H,1H3,(H,8,9,10)	LRUDIIUSNGCQKF-UHFFFAOYSA-N	3	0.0245814	0.180846	0.181996	13.5066	Elbe	Industrial
5-Methyl-1H-benzotriazole	136-85-6	pos	2011	E2	365	[M+H]+	InChI=1S/C7H7N3/c1-5-2-3-6-7(4-5)9-10-8-6/h2-4H,1H3,(H,8,9,10)	LRUDIIUSNGCQKF-UHFFFAOYSA-N	3	0.0128793	0.0810602	0.0817206	15.7601	Elbe	Industrial
5-Methyl-1H-benzotriazole	136-85-6	pos	2011	Mu	365	[M+H]+	InChI=1S/C7H7N3/c1-5-2-3-6-7(4-5)9-10-8-6/h2-4H,1H3,(H,8,9,10)	LRUDIIUSNGCQKF-UHFFFAOYSA-N	3	0.113482	0.125565	0.154441	73.479	Mulde	Industrial
5-Methyl-1H-benzotriazole	136-85-6	pos	2011	R4	365	[M+H]+	InChI=1S/C7H7N3/c1-5-2-3-6-7(4-5)9-10-8-6/h2-4H,1H3,(H,8,9,10)	LRUDIIUSNGCQKF-UHFFFAOYSA-N	3	0.0129679	0.112999	0.113506	11.4249	Rhine	Industrial
5-Methyl-1H-benzotriazole	136-85-6	pos	2011	R3	365	[M+H]+	InChI=1S/C7H7N3/c1-5-2-3-6-7(4-5)9-10-8-6/h2-4H,1H3,(H,8,9,10)	LRUDIIUSNGCQKF-UHFFFAOYSA-N	3	0.00753872	0.203081	0.203174	3.71048	Rhine	Industrial
5-Methyl-1H-benzotriazole	136-85-6	pos	2011	Sa	365	[M+H]+	InChI=1S/C7H7N3/c1-5-2-3-6-7(4-5)9-10-8-6/h2-4H,1H3,(H,8,9,10)	LRUDIIUSNGCQKF-UHFFFAOYSA-N	3	0.0561209	0.338037	0.341236	16.4463	Saale	Industrial
5-Methyl-1H-benzotriazole	136-85-6	pos	2011	S1	365	[M+H]+	InChI=1S/C7H7N3/c1-5-2-3-6-7(4-5)9-10-8-6/h2-4H,1H3,(H,8,9,10)	LRUDIIUSNGCQKF-UHFFFAOYSA-N	3	0.119449	0.266927	0.282698	42.2533	Saar	Industrial
5-Methyl-1H-benzotriazole	136-85-6	pos	2011	S2	365	[M+H]+	InChI=1S/C7H7N3/c1-5-2-3-6-7(4-5)9-10-8-6/h2-4H,1H3,(H,8,9,10)	LRUDIIUSNGCQKF-UHFFFAOYSA-N	3	0.215333	0.95329	0.970111	22.1967	Saar	Industrial
5-Methyl-1H-benzotriazole	136-85-6	pos	2012	E5	365	[M+H]+	InChI=1S/C7H7N3/c1-5-2-3-6-7(4-5)9-10-8-6/h2-4H,1H3,(H,8,9,10)	LRUDIIUSNGCQKF-UHFFFAOYSA-N	3	0.0264004	0.315177	0.315936	8.35626	Elbe	Industrial
5-Methyl-1H-benzotriazole	136-85-6	pos	2012	E4	365	[M+H]+	InChI=1S/C7H7N3/c1-5-2-3-6-7(4-5)9-10-8-6/h2-4H,1H3,(H,8,9,10)	LRUDIIUSNGCQKF-UHFFFAOYSA-N	3	0.0147482	0.0909362	0.0916846	16.0858	Elbe	Industrial
5-Methyl-1H-benzotriazole	136-85-6	pos	2012	E1	365	[M+H]+	InChI=1S/C7H7N3/c1-5-2-3-6-7(4-5)9-10-8-6/h2-4H,1H3,(H,8,9,10)	LRUDIIUSNGCQKF-UHFFFAOYSA-N	3	0.0377652	0.117383	0.121097	31.186	Elbe	Industrial
5-Methyl-1H-benzotriazole	136-85-6	pos	2012	E2	365	[M+H]+	InChI=1S/C7H7N3/c1-5-2-3-6-7(4-5)9-10-8-6/h2-4H,1H3,(H,8,9,10)	LRUDIIUSNGCQKF-UHFFFAOYSA-N	3	0.055489	0.122041	0.131791	42.1037	Elbe	Industrial
5-Methyl-1H-benzotriazole	136-85-6	pos	2012	Mu	365	[M+H]+	InChI=1S/C7H7N3/c1-5-2-3-6-7(4-5)9-10-8-6/h2-4H,1H3,(H,8,9,10)	LRUDIIUSNGCQKF-UHFFFAOYSA-N	3	0.113465	0.211638	0.234195	48.449	Mulde	Industrial
5-Methyl-1H-benzotriazole	136-85-6	pos	2012	R4	365	[M+H]+	InChI=1S/C7H7N3/c1-5-2-3-6-7(4-5)9-10-8-6/h2-4H,1H3,(H,8,9,10)	LRUDIIUSNGCQKF-UHFFFAOYSA-N	3	0.0168875	0.12018	0.120962	13.961	Rhine	Industrial
5-Methyl-1H-benzotriazole	136-85-6	pos	2012	R3	365	[M+H]+	InChI=1S/C7H7N3/c1-5-2-3-6-7(4-5)9-10-8-6/h2-4H,1H3,(H,8,9,10)	LRUDIIUSNGCQKF-UHFFFAOYSA-N	3	0.0137857	0.156198	0.156616	8.80224	Rhine	Industrial
5-Methyl-1H-benzotriazole	136-85-6	pos	2012	Sa	365	[M+H]+	InChI=1S/C7H7N3/c1-5-2-3-6-7(4-5)9-10-8-6/h2-4H,1H3,(H,8,9,10)	LRUDIIUSNGCQKF-UHFFFAOYSA-N	3	0.109933	0.225323	0.246155	44.6601	Saale	Industrial
5-Methyl-1H-benzotriazole	136-85-6	pos	2012	S1	365	[M+H]+	InChI=1S/C7H7N3/c1-5-2-3-6-7(4-5)9-10-8-6/h2-4H,1H3,(H,8,9,10)	LRUDIIUSNGCQKF-UHFFFAOYSA-N	3	0.181069	0.238974	0.28234	64.1314	Saar	Industrial
5-Methyl-1H-benzotriazole	136-85-6	pos	2012	S2	365	[M+H]+	InChI=1S/C7H7N3/c1-5-2-3-6-7(4-5)9-10-8-6/h2-4H,1H3,(H,8,9,10)	LRUDIIUSNGCQKF-UHFFFAOYSA-N	3	0.0342324	2.81566	2.8158	1.21573	Saar	Industrial
5-Methyl-1H-benzotriazole	136-85-6	pos	2013	E5	365	[M+H]+	InChI=1S/C7H7N3/c1-5-2-3-6-7(4-5)9-10-8-6/h2-4H,1H3,(H,8,9,10)	LRUDIIUSNGCQKF-UHFFFAOYSA-N	3	0.0249389	0.165015	0.166234	15.0023	Elbe	Industrial
5-Methyl-1H-benzotriazole	136-85-6	pos	2013	E4	365	[M+H]+	InChI=1S/C7H7N3/c1-5-2-3-6-7(4-5)9-10-8-6/h2-4H,1H3,(H,8,9,10)	LRUDIIUSNGCQKF-UHFFFAOYSA-N	3	0.150271	0.111872	0.152671	98.4281	Elbe	Industrial
5-Methyl-1H-benzotriazole	136-85-6	pos	2013	E1	365	[M+H]+	InChI=1S/C7H7N3/c1-5-2-3-6-7(4-5)9-10-8-6/h2-4H,1H3,(H,8,9,10)	LRUDIIUSNGCQKF-UHFFFAOYSA-N	3	0.0425791	0.16909	0.172994	24.6131	Elbe	Industrial
5-Methyl-1H-benzotriazole	136-85-6	pos	2013	E2	365	[M+H]+	InChI=1S/C7H7N3/c1-5-2-3-6-7(4-5)9-10-8-6/h2-4H,1H3,(H,8,9,10)	LRUDIIUSNGCQKF-UHFFFAOYSA-N	3	0.140454	0.21188	0.236036	59.5052	Elbe	Industrial
5-Methyl-1H-benzotriazole	136-85-6	pos	2013	Mu	365	[M+H]+	InChI=1S/C7H7N3/c1-5-2-3-6-7(4-5)9-10-8-6/h2-4H,1H3,(H,8,9,10)	LRUDIIUSNGCQKF-UHFFFAOYSA-N	3	0.195997	0.21495	0.260722	75.1746	Mulde	Industrial
5-Methyl-1H-benzotriazole	136-85-6	pos	2013	R4	365	[M+H]+	InChI=1S/C7H7N3/c1-5-2-3-6-7(4-5)9-10-8-6/h2-4H,1H3,(H,8,9,10)	LRUDIIUSNGCQKF-UHFFFAOYSA-N	3	0.00294147	0.0950934	0.0951239	3.09226	Rhine	Industrial
5-Methyl-1H-benzotriazole	136-85-6	pos	2013	R3	365	[M+H]+	InChI=1S/C7H7N3/c1-5-2-3-6-7(4-5)9-10-8-6/h2-4H,1H3,(H,8,9,10)	LRUDIIUSNGCQKF-UHFFFAOYSA-N	3	0.0124393	0.118886	0.119336	10.4238	Rhine	Industrial
5-Methyl-1H-benzotriazole	136-85-6	pos	2013	Sa	365	[M+H]+	InChI=1S/C7H7N3/c1-5-2-3-6-7(4-5)9-10-8-6/h2-4H,1H3,(H,8,9,10)	LRUDIIUSNGCQKF-UHFFFAOYSA-N	3	0.0779712	0.288692	0.295395	26.3956	Saale	Industrial
5-Methyl-1H-benzotriazole	136-85-6	pos	2013	S1	365	[M+H]+	InChI=1S/C7H7N3/c1-5-2-3-6-7(4-5)9-10-8-6/h2-4H,1H3,(H,8,9,10)	LRUDIIUSNGCQKF-UHFFFAOYSA-N	3	0.0496057	0.267915	0.270968	18.3069	Saar	Industrial
5-Methyl-1H-benzotriazole	136-85-6	pos	2013	S2	365	[M+H]+	InChI=1S/C7H7N3/c1-5-2-3-6-7(4-5)9-10-8-6/h2-4H,1H3,(H,8,9,10)	LRUDIIUSNGCQKF-UHFFFAOYSA-N	3	0.0955404	2.07778	2.07927	4.5949	Saar	Industrial
5-Methyl-1H-benzotriazole	136-85-6	pos	2014	E5	365	[M+H]+	InChI=1S/C7H7N3/c1-5-2-3-6-7(4-5)9-10-8-6/h2-4H,1H3,(H,8,9,10)	LRUDIIUSNGCQKF-UHFFFAOYSA-N	3	0.00770834	0.205523	0.205619	3.74884	Elbe	Industrial
5-Methyl-1H-benzotriazole	136-85-6	pos	2014	E4	365	[M+H]+	InChI=1S/C7H7N3/c1-5-2-3-6-7(4-5)9-10-8-6/h2-4H,1H3,(H,8,9,10)	LRUDIIUSNGCQKF-UHFFFAOYSA-N	3	0.0897436	0.0973503	0.116655	76.9307	Elbe	Industrial
5-Methyl-1H-benzotriazole	136-85-6	pos	2014	E1	365	[M+H]+	InChI=1S/C7H7N3/c1-5-2-3-6-7(4-5)9-10-8-6/h2-4H,1H3,(H,8,9,10)	LRUDIIUSNGCQKF-UHFFFAOYSA-N	3	0.0299363	0.2	0.201426	14.8622	Elbe	Industrial
5-Methyl-1H-benzotriazole	136-85-6	pos	2014	E2	365	[M+H]+	InChI=1S/C7H7N3/c1-5-2-3-6-7(4-5)9-10-8-6/h2-4H,1H3,(H,8,9,10)	LRUDIIUSNGCQKF-UHFFFAOYSA-N	3	0.0519779	0.116999	0.12393	41.9414	Elbe	Industrial
5-Methyl-1H-benzotriazole	136-85-6	pos	2014	Mu	365	[M+H]+	InChI=1S/C7H7N3/c1-5-2-3-6-7(4-5)9-10-8-6/h2-4H,1H3,(H,8,9,10)	LRUDIIUSNGCQKF-UHFFFAOYSA-N	3	0.240456	0.333296	0.380119	63.2581	Mulde	Industrial
5-Methyl-1H-benzotriazole	136-85-6	pos	2014	R4	365	[M+H]+	InChI=1S/C7H7N3/c1-5-2-3-6-7(4-5)9-10-8-6/h2-4H,1H3,(H,8,9,10)	LRUDIIUSNGCQKF-UHFFFAOYSA-N	3	0.0119218	0.0935105	0.0939975	12.6832	Rhine	Industrial
5-Methyl-1H-benzotriazole	136-85-6	pos	2014	R3	365	[M+H]+	InChI=1S/C7H7N3/c1-5-2-3-6-7(4-5)9-10-8-6/h2-4H,1H3,(H,8,9,10)	LRUDIIUSNGCQKF-UHFFFAOYSA-N	3	0.00613921	0.073045	0.0732191	8.3847	Rhine	Industrial
5-Methyl-1H-benzotriazole	136-85-6	pos	2014	Sa	365	[M+H]+	InChI=1S/C7H7N3/c1-5-2-3-6-7(4-5)9-10-8-6/h2-4H,1H3,(H,8,9,10)	LRUDIIUSNGCQKF-UHFFFAOYSA-N	3	0.117931	0.316706	0.330611	35.6705	Saale	Industrial
5-Methyl-1H-benzotriazole	136-85-6	pos	2014	S1	365	[M+H]+	InChI=1S/C7H7N3/c1-5-2-3-6-7(4-5)9-10-8-6/h2-4H,1H3,(H,8,9,10)	LRUDIIUSNGCQKF-UHFFFAOYSA-N	3	0.149547	0.200525	0.228397	65.4765	Saar	Industrial
5-Methyl-1H-benzotriazole	136-85-6	pos	2014	S2	365	[M+H]+	InChI=1S/C7H7N3/c1-5-2-3-6-7(4-5)9-10-8-6/h2-4H,1H3,(H,8,9,10)	LRUDIIUSNGCQKF-UHFFFAOYSA-N	3	0.0745238	0.464224	0.468454	15.9085	Saar	Industrial
5-Methyl-1H-benzotriazole	136-85-6	pos	2015	E5	365	[M+H]+	InChI=1S/C7H7N3/c1-5-2-3-6-7(4-5)9-10-8-6/h2-4H,1H3,(H,8,9,10)	LRUDIIUSNGCQKF-UHFFFAOYSA-N	3	0.0129346	0.183419	0.183725	7.04019	Elbe	Industrial
5-Methyl-1H-benzotriazole	136-85-6	pos	2015	E4	365	[M+H]+	InChI=1S/C7H7N3/c1-5-2-3-6-7(4-5)9-10-8-6/h2-4H,1H3,(H,8,9,10)	LRUDIIUSNGCQKF-UHFFFAOYSA-N	2	0.0223134	0.0384259	0.0415391	53.7167	Elbe	Industrial
5-Methyl-1H-benzotriazole	136-85-6	pos	2015	E1	365	[M+H]+	InChI=1S/C7H7N3/c1-5-2-3-6-7(4-5)9-10-8-6/h2-4H,1H3,(H,8,9,10)	LRUDIIUSNGCQKF-UHFFFAOYSA-N	3	0.0439595	0.215815	0.218666	20.1035	Elbe	Industrial
5-Methyl-1H-benzotriazole	136-85-6	pos	2015	E2	365	[M+H]+	InChI=1S/C7H7N3/c1-5-2-3-6-7(4-5)9-10-8-6/h2-4H,1H3,(H,8,9,10)	LRUDIIUSNGCQKF-UHFFFAOYSA-N	3	0.126734	0.327919	0.3445	36.7879	Elbe	Industrial
5-Methyl-1H-benzotriazole	136-85-6	pos	2015	Mu	365	[M+H]+	InChI=1S/C7H7N3/c1-5-2-3-6-7(4-5)9-10-8-6/h2-4H,1H3,(H,8,9,10)	LRUDIIUSNGCQKF-UHFFFAOYSA-N	3	0.46325	0.912015	1.00387	46.1463	Mulde	Industrial
5-Methyl-1H-benzotriazole	136-85-6	pos	2015	R4	365	[M+H]+	InChI=1S/C7H7N3/c1-5-2-3-6-7(4-5)9-10-8-6/h2-4H,1H3,(H,8,9,10)	LRUDIIUSNGCQKF-UHFFFAOYSA-N	3	0.046415	0.514247	0.515674	9.00083	Rhine	Industrial
5-Methyl-1H-benzotriazole	136-85-6	pos	2015	R3	365	[M+H]+	InChI=1S/C7H7N3/c1-5-2-3-6-7(4-5)9-10-8-6/h2-4H,1H3,(H,8,9,10)	LRUDIIUSNGCQKF-UHFFFAOYSA-N	3	0.0116957	0.0771134	0.0776811	15.056	Rhine	Industrial
5-Methyl-1H-benzotriazole	136-85-6	pos	2015	Sa	365	[M+H]+	InChI=1S/C7H7N3/c1-5-2-3-6-7(4-5)9-10-8-6/h2-4H,1H3,(H,8,9,10)	LRUDIIUSNGCQKF-UHFFFAOYSA-N	3	0.14113	0.339538	0.361655	39.0233	Saale	Industrial
5-Methyl-1H-benzotriazole	136-85-6	pos	2015	S1	365	[M+H]+	InChI=1S/C7H7N3/c1-5-2-3-6-7(4-5)9-10-8-6/h2-4H,1H3,(H,8,9,10)	LRUDIIUSNGCQKF-UHFFFAOYSA-N	3	0.0743065	0.330001	0.335254	22.1642	Saar	Industrial
5-Methyl-1H-benzotriazole	136-85-6	pos	2015	S2	365	[M+H]+	InChI=1S/C7H7N3/c1-5-2-3-6-7(4-5)9-10-8-6/h2-4H,1H3,(H,8,9,10)	LRUDIIUSNGCQKF-UHFFFAOYSA-N	3	0.0324917	0.325254	0.326344	9.95627	Saar	Industrial
5-Methyl-1H-benzotriazole	136-85-6	pos	2016	E5	365	[M+H]+	InChI=1S/C7H7N3/c1-5-2-3-6-7(4-5)9-10-8-6/h2-4H,1H3,(H,8,9,10)	LRUDIIUSNGCQKF-UHFFFAOYSA-N	3	0.0398638	0.0957715	0.101328	39.3412	Elbe	Industrial
5-Methyl-1H-benzotriazole	136-85-6	pos	2016	E4	365	[M+H]+	InChI=1S/C7H7N3/c1-5-2-3-6-7(4-5)9-10-8-6/h2-4H,1H3,(H,8,9,10)	LRUDIIUSNGCQKF-UHFFFAOYSA-N	3	0.182991	0.195132	0.237775	76.9595	Elbe	Industrial
5-Methyl-1H-benzotriazole	136-85-6	pos	2016	E1	365	[M+H]+	InChI=1S/C7H7N3/c1-5-2-3-6-7(4-5)9-10-8-6/h2-4H,1H3,(H,8,9,10)	LRUDIIUSNGCQKF-UHFFFAOYSA-N	3	0.0682083	0.300278	0.305667	22.3146	Elbe	Industrial
5-Methyl-1H-benzotriazole	136-85-6	pos	2016	E2	365	[M+H]+	InChI=1S/C7H7N3/c1-5-2-3-6-7(4-5)9-10-8-6/h2-4H,1H3,(H,8,9,10)	LRUDIIUSNGCQKF-UHFFFAOYSA-N	3	0.0804734	0.265238	0.273785	29.3929	Elbe	Industrial
5-Methyl-1H-benzotriazole	136-85-6	pos	2016	Mu	365	[M+H]+	InChI=1S/C7H7N3/c1-5-2-3-6-7(4-5)9-10-8-6/h2-4H,1H3,(H,8,9,10)	LRUDIIUSNGCQKF-UHFFFAOYSA-N	3	0.182424	0.585635	0.605859	30.1099	Mulde	Industrial
5-Methyl-1H-benzotriazole	136-85-6	pos	2016	R4	365	[M+H]+	InChI=1S/C7H7N3/c1-5-2-3-6-7(4-5)9-10-8-6/h2-4H,1H3,(H,8,9,10)	LRUDIIUSNGCQKF-UHFFFAOYSA-N	3	0.0989806	0.581795	0.587771	16.84	Rhine	Industrial
5-Methyl-1H-benzotriazole	136-85-6	pos	2016	R3	365	[M+H]+	InChI=1S/C7H7N3/c1-5-2-3-6-7(4-5)9-10-8-6/h2-4H,1H3,(H,8,9,10)	LRUDIIUSNGCQKF-UHFFFAOYSA-N	3	0.0272328	0.181097	0.182388	14.9312	Rhine	Industrial
5-Methyl-1H-benzotriazole	136-85-6	pos	2016	Sa	365	[M+H]+	InChI=1S/C7H7N3/c1-5-2-3-6-7(4-5)9-10-8-6/h2-4H,1H3,(H,8,9,10)	LRUDIIUSNGCQKF-UHFFFAOYSA-N	3	0.0528316	0.62166	0.623122	8.47852	Saale	Industrial
5-Methyl-1H-benzotriazole	136-85-6	pos	2016	S1	365	[M+H]+	InChI=1S/C7H7N3/c1-5-2-3-6-7(4-5)9-10-8-6/h2-4H,1H3,(H,8,9,10)	LRUDIIUSNGCQKF-UHFFFAOYSA-N	3	0.0405811	0.606642	0.60756	6.67936	Saar	Industrial
5-Methyl-1H-benzotriazole	136-85-6	pos	2016	S2	365	[M+H]+	InChI=1S/C7H7N3/c1-5-2-3-6-7(4-5)9-10-8-6/h2-4H,1H3,(H,8,9,10)	LRUDIIUSNGCQKF-UHFFFAOYSA-N	3	0.553666	4.05002	4.074	13.5903	Saar	Industrial
5-Methyl-1H-benzotriazole	136-85-6	pos	2017	E5	365	[M+H]+	InChI=1S/C7H7N3/c1-5-2-3-6-7(4-5)9-10-8-6/h2-4H,1H3,(H,8,9,10)	LRUDIIUSNGCQKF-UHFFFAOYSA-N	3	0.0449198	0.0537415	0.0668494	67.1956	Elbe	Industrial
5-Methyl-1H-benzotriazole	136-85-6	pos	2017	E4	365	[M+H]+	InChI=1S/C7H7N3/c1-5-2-3-6-7(4-5)9-10-8-6/h2-4H,1H3,(H,8,9,10)	LRUDIIUSNGCQKF-UHFFFAOYSA-N	3	0.184926	0.199246	0.239152	77.3257	Elbe	Industrial
5-Methyl-1H-benzotriazole	136-85-6	pos	2017	E1	365	[M+H]+	InChI=1S/C7H7N3/c1-5-2-3-6-7(4-5)9-10-8-6/h2-4H,1H3,(H,8,9,10)	LRUDIIUSNGCQKF-UHFFFAOYSA-N	3	0.057973	0.303114	0.306742	18.8996	Elbe	Industrial
5-Methyl-1H-benzotriazole	136-85-6	pos	2017	E2	365	[M+H]+	InChI=1S/C7H7N3/c1-5-2-3-6-7(4-5)9-10-8-6/h2-4H,1H3,(H,8,9,10)	LRUDIIUSNGCQKF-UHFFFAOYSA-N	3	0.163616	0.181555	0.229794	71.2013	Elbe	Industrial
5-Methyl-1H-benzotriazole	136-85-6	pos	2017	Mu	365	[M+H]+	InChI=1S/C7H7N3/c1-5-2-3-6-7(4-5)9-10-8-6/h2-4H,1H3,(H,8,9,10)	LRUDIIUSNGCQKF-UHFFFAOYSA-N	3	0.146535	0.289599	0.312345	46.9147	Mulde	Industrial
5-Methyl-1H-benzotriazole	136-85-6	pos	2017	R4	365	[M+H]+	InChI=1S/C7H7N3/c1-5-2-3-6-7(4-5)9-10-8-6/h2-4H,1H3,(H,8,9,10)	LRUDIIUSNGCQKF-UHFFFAOYSA-N	3	0.0352913	0.683083	0.683681	5.16195	Rhine	Industrial
5-Methyl-1H-benzotriazole	136-85-6	pos	2017	R3	365	[M+H]+	InChI=1S/C7H7N3/c1-5-2-3-6-7(4-5)9-10-8-6/h2-4H,1H3,(H,8,9,10)	LRUDIIUSNGCQKF-UHFFFAOYSA-N	3	0.00978206	0.160959	0.161161	6.06975	Rhine	Industrial
5-Methyl-1H-benzotriazole	136-85-6	pos	2017	Sa	365	[M+H]+	InChI=1S/C7H7N3/c1-5-2-3-6-7(4-5)9-10-8-6/h2-4H,1H3,(H,8,9,10)	LRUDIIUSNGCQKF-UHFFFAOYSA-N	3	0.100286	0.260323	0.273293	36.6955	Saale	Industrial
5-Methyl-1H-benzotriazole	136-85-6	pos	2017	S1	365	[M+H]+	InChI=1S/C7H7N3/c1-5-2-3-6-7(4-5)9-10-8-6/h2-4H,1H3,(H,8,9,10)	LRUDIIUSNGCQKF-UHFFFAOYSA-N	3	0.0525431	0.461753	0.463832	11.328	Saar	Industrial
5-Methyl-1H-benzotriazole	136-85-6	pos	2017	S2	365	[M+H]+	InChI=1S/C7H7N3/c1-5-2-3-6-7(4-5)9-10-8-6/h2-4H,1H3,(H,8,9,10)	LRUDIIUSNGCQKF-UHFFFAOYSA-N	3	0.155631	4.48558	4.48739	3.46818	Saar	Industrial
5-Methyl-1H-benzotriazole	136-85-6	pos	2018	E5	365	[M+H]+	InChI=1S/C7H7N3/c1-5-2-3-6-7(4-5)9-10-8-6/h2-4H,1H3,(H,8,9,10)	LRUDIIUSNGCQKF-UHFFFAOYSA-N	3	0.0204405	0.258292	0.258841	7.89693	Elbe	Industrial
5-Methyl-1H-benzotriazole	136-85-6	pos	2018	E4	365	[M+H]+	InChI=1S/C7H7N3/c1-5-2-3-6-7(4-5)9-10-8-6/h2-4H,1H3,(H,8,9,10)	LRUDIIUSNGCQKF-UHFFFAOYSA-N	2	0.124786	0.14231	0.167445	74.5236	Elbe	Industrial
5-Methyl-1H-benzotriazole	136-85-6	pos	2018	E1	365	[M+H]+	InChI=1S/C7H7N3/c1-5-2-3-6-7(4-5)9-10-8-6/h2-4H,1H3,(H,8,9,10)	LRUDIIUSNGCQKF-UHFFFAOYSA-N	3	0.0335823	0.328958	0.33006	10.1746	Elbe	Industrial
5-Methyl-1H-benzotriazole	136-85-6	pos	2018	E2	365	[M+H]+	InChI=1S/C7H7N3/c1-5-2-3-6-7(4-5)9-10-8-6/h2-4H,1H3,(H,8,9,10)	LRUDIIUSNGCQKF-UHFFFAOYSA-N	3	0.0726153	0.465288	0.469032	15.482	Elbe	Industrial
5-Methyl-1H-benzotriazole	136-85-6	pos	2018	Mu	365	[M+H]+	InChI=1S/C7H7N3/c1-5-2-3-6-7(4-5)9-10-8-6/h2-4H,1H3,(H,8,9,10)	LRUDIIUSNGCQKF-UHFFFAOYSA-N	3	0.0692732	0.185547	0.193957	35.7157	Mulde	Industrial
5-Methyl-1H-benzotriazole	136-85-6	pos	2018	R4	365	[M+H]+	InChI=1S/C7H7N3/c1-5-2-3-6-7(4-5)9-10-8-6/h2-4H,1H3,(H,8,9,10)	LRUDIIUSNGCQKF-UHFFFAOYSA-N	3	0.0212794	0.674853	0.675074	3.15216	Rhine	Industrial
5-Methyl-1H-benzotriazole	136-85-6	pos	2018	R3	365	[M+H]+	InChI=1S/C7H7N3/c1-5-2-3-6-7(4-5)9-10-8-6/h2-4H,1H3,(H,8,9,10)	LRUDIIUSNGCQKF-UHFFFAOYSA-N	3	0.0120362	0.165979	0.166277	7.23861	Rhine	Industrial
5-Methyl-1H-benzotriazole	136-85-6	pos	2018	Sa	365	[M+H]+	InChI=1S/C7H7N3/c1-5-2-3-6-7(4-5)9-10-8-6/h2-4H,1H3,(H,8,9,10)	LRUDIIUSNGCQKF-UHFFFAOYSA-N	3	0.0494104	0.190483	0.194866	25.3561	Saale	Industrial
5-Methyl-1H-benzotriazole	136-85-6	pos	2018	S1	365	[M+H]+	InChI=1S/C7H7N3/c1-5-2-3-6-7(4-5)9-10-8-6/h2-4H,1H3,(H,8,9,10)	LRUDIIUSNGCQKF-UHFFFAOYSA-N	3	0.0161465	0.369397	0.369629	4.3683	Saar	Industrial
5-Methyl-1H-benzotriazole	136-85-6	pos	2018	S2	365	[M+H]+	InChI=1S/C7H7N3/c1-5-2-3-6-7(4-5)9-10-8-6/h2-4H,1H3,(H,8,9,10)	LRUDIIUSNGCQKF-UHFFFAOYSA-N	3	0.0634155	1.95587	1.95656	3.24118	Saar	Industrial
5-Methyl-1H-benzotriazole	136-85-6	pos	2019	E5	365	[M+H]+	InChI=1S/C7H7N3/c1-5-2-3-6-7(4-5)9-10-8-6/h2-4H,1H3,(H,8,9,10)	LRUDIIUSNGCQKF-UHFFFAOYSA-N	3	0.0373768	0.0662894	0.0719757	51.9298	Elbe	Industrial
5-Methyl-1H-benzotriazole	136-85-6	pos	2019	E4	365	[M+H]+	InChI=1S/C7H7N3/c1-5-2-3-6-7(4-5)9-10-8-6/h2-4H,1H3,(H,8,9,10)	LRUDIIUSNGCQKF-UHFFFAOYSA-N	2	0.0167304	0.0216891	0.0247057	67.7187	Elbe	Industrial
5-Methyl-1H-benzotriazole	136-85-6	pos	2019	E1	365	[M+H]+	InChI=1S/C7H7N3/c1-5-2-3-6-7(4-5)9-10-8-6/h2-4H,1H3,(H,8,9,10)	LRUDIIUSNGCQKF-UHFFFAOYSA-N	3	0.218994	0.458622	0.492763	44.4421	Elbe	Industrial
5-Methyl-1H-benzotriazole	136-85-6	pos	2019	E2	365	[M+H]+	InChI=1S/C7H7N3/c1-5-2-3-6-7(4-5)9-10-8-6/h2-4H,1H3,(H,8,9,10)	LRUDIIUSNGCQKF-UHFFFAOYSA-N	3	0.100242	0.331668	0.341554	29.3487	Elbe	Industrial
5-Methyl-1H-benzotriazole	136-85-6	pos	2019	Mu	365	[M+H]+	InChI=1S/C7H7N3/c1-5-2-3-6-7(4-5)9-10-8-6/h2-4H,1H3,(H,8,9,10)	LRUDIIUSNGCQKF-UHFFFAOYSA-N	3	0.119947	0.290891	0.305113	39.3122	Mulde	Industrial
5-Methyl-1H-benzotriazole	136-85-6	pos	2019	R4	365	[M+H]+	InChI=1S/C7H7N3/c1-5-2-3-6-7(4-5)9-10-8-6/h2-4H,1H3,(H,8,9,10)	LRUDIIUSNGCQKF-UHFFFAOYSA-N	3	0.136446	0.306218	0.325858	41.8729	Rhine	Industrial
5-Methyl-1H-benzotriazole	136-85-6	pos	2019	R3	365	[M+H]+	InChI=1S/C7H7N3/c1-5-2-3-6-7(4-5)9-10-8-6/h2-4H,1H3,(H,8,9,10)	LRUDIIUSNGCQKF-UHFFFAOYSA-N	3	0.0978076	0.129998	0.159648	61.2644	Rhine	Industrial
5-Methyl-1H-benzotriazole	136-85-6	pos	2019	Sa	365	[M+H]+	InChI=1S/C7H7N3/c1-5-2-3-6-7(4-5)9-10-8-6/h2-4H,1H3,(H,8,9,10)	LRUDIIUSNGCQKF-UHFFFAOYSA-N	3	0.0871808	0.232296	0.243162	35.853	Saale	Industrial
5-Methyl-1H-benzotriazole	136-85-6	pos	2019	S1	365	[M+H]+	InChI=1S/C7H7N3/c1-5-2-3-6-7(4-5)9-10-8-6/h2-4H,1H3,(H,8,9,10)	LRUDIIUSNGCQKF-UHFFFAOYSA-N	3	0.0728537	0.125269	0.138843	52.4719	Saar	Industrial
5-Methyl-1H-benzotriazole	136-85-6	pos	2019	S2	365	[M+H]+	InChI=1S/C7H7N3/c1-5-2-3-6-7(4-5)9-10-8-6/h2-4H,1H3,(H,8,9,10)	LRUDIIUSNGCQKF-UHFFFAOYSA-N	3	0.050139	0.908254	0.909197	5.51464	Saar	Industrial
5-Methyl-1H-benzotriazole	136-85-6	pos	2020	E5	365	[M+H]+	InChI=1S/C7H7N3/c1-5-2-3-6-7(4-5)9-10-8-6/h2-4H,1H3,(H,8,9,10)	LRUDIIUSNGCQKF-UHFFFAOYSA-N	3	0.00841279	0.0564978	0.0568922	14.7873	Elbe	Industrial
5-Methyl-1H-benzotriazole	136-85-6	pos	2020	E4	365	[M+H]+	InChI=1S/C7H7N3/c1-5-2-3-6-7(4-5)9-10-8-6/h2-4H,1H3,(H,8,9,10)	LRUDIIUSNGCQKF-UHFFFAOYSA-N	2	0.0129278	0.0658082	0.0664401	19.4578	Elbe	Industrial
5-Methyl-1H-benzotriazole	136-85-6	pos	2020	E1	365	[M+H]+	InChI=1S/C7H7N3/c1-5-2-3-6-7(4-5)9-10-8-6/h2-4H,1H3,(H,8,9,10)	LRUDIIUSNGCQKF-UHFFFAOYSA-N	3	0.0371381	0.224756	0.226853	16.371	Elbe	Industrial
5-Methyl-1H-benzotriazole	136-85-6	pos	2020	E2	365	[M+H]+	InChI=1S/C7H7N3/c1-5-2-3-6-7(4-5)9-10-8-6/h2-4H,1H3,(H,8,9,10)	LRUDIIUSNGCQKF-UHFFFAOYSA-N	3	0.213557	0.387922	0.422026	50.6028	Elbe	Industrial
5-Methyl-1H-benzotriazole	136-85-6	pos	2020	Mu	365	[M+H]+	InChI=1S/C7H7N3/c1-5-2-3-6-7(4-5)9-10-8-6/h2-4H,1H3,(H,8,9,10)	LRUDIIUSNGCQKF-UHFFFAOYSA-N	3	0.0528524	0.158223	0.164619	32.1058	Mulde	Industrial
5-Methyl-1H-benzotriazole	136-85-6	pos	2020	R4	365	[M+H]+	InChI=1S/C7H7N3/c1-5-2-3-6-7(4-5)9-10-8-6/h2-4H,1H3,(H,8,9,10)	LRUDIIUSNGCQKF-UHFFFAOYSA-N	3	0.0500863	0.139642	0.144859	34.576	Rhine	Industrial
5-Methyl-1H-benzotriazole	136-85-6	pos	2020	R3	365	[M+H]+	InChI=1S/C7H7N3/c1-5-2-3-6-7(4-5)9-10-8-6/h2-4H,1H3,(H,8,9,10)	LRUDIIUSNGCQKF-UHFFFAOYSA-N	3	0.0198235	0.118834	0.119922	16.5303	Rhine	Industrial
5-Methyl-1H-benzotriazole	136-85-6	pos	2020	Sa	365	[M+H]+	InChI=1S/C7H7N3/c1-5-2-3-6-7(4-5)9-10-8-6/h2-4H,1H3,(H,8,9,10)	LRUDIIUSNGCQKF-UHFFFAOYSA-N	3	0.108818	0.17909	0.19674	55.3103	Saale	Industrial
5-Methyl-1H-benzotriazole	136-85-6	pos	2020	S1	365	[M+H]+	InChI=1S/C7H7N3/c1-5-2-3-6-7(4-5)9-10-8-6/h2-4H,1H3,(H,8,9,10)	LRUDIIUSNGCQKF-UHFFFAOYSA-N	2	0.0071318	0.0451815	0.0454621	15.6874	Saar	Industrial
5-Methyl-1H-benzotriazole	136-85-6	pos	2020	S2	365	[M+H]+	InChI=1S/C7H7N3/c1-5-2-3-6-7(4-5)9-10-8-6/h2-4H,1H3,(H,8,9,10)	LRUDIIUSNGCQKF-UHFFFAOYSA-N	3	0.245725	0.931284	0.950743	25.8456	Saar	Industrial
5-Methyl-1H-benzotriazole	136-85-6	pos	2021	E5	365	[M+H]+	InChI=1S/C7H7N3/c1-5-2-3-6-7(4-5)9-10-8-6/h2-4H,1H3,(H,8,9,10)	LRUDIIUSNGCQKF-UHFFFAOYSA-N	3	0.0143491	0.0669764	0.067967	21.1118	Elbe	Industrial
5-Methyl-1H-benzotriazole	136-85-6	pos	2021	E4	365	[M+H]+	InChI=1S/C7H7N3/c1-5-2-3-6-7(4-5)9-10-8-6/h2-4H,1H3,(H,8,9,10)	LRUDIIUSNGCQKF-UHFFFAOYSA-N	3	0.00842276	0.0506492	0.051144	16.4687	Elbe	Industrial
5-Methyl-1H-benzotriazole	136-85-6	pos	2021	E1	365	[M+H]+	InChI=1S/C7H7N3/c1-5-2-3-6-7(4-5)9-10-8-6/h2-4H,1H3,(H,8,9,10)	LRUDIIUSNGCQKF-UHFFFAOYSA-N	3	0.0137231	0.210274	0.21058	6.51678	Elbe	Industrial
5-Methyl-1H-benzotriazole	136-85-6	pos	2021	E2	365	[M+H]+	InChI=1S/C7H7N3/c1-5-2-3-6-7(4-5)9-10-8-6/h2-4H,1H3,(H,8,9,10)	LRUDIIUSNGCQKF-UHFFFAOYSA-N	3	0.0635988	0.0840885	0.0961096	66.1732	Elbe	Industrial
5-Methyl-1H-benzotriazole	136-85-6	pos	2021	Mu	365	[M+H]+	InChI=1S/C7H7N3/c1-5-2-3-6-7(4-5)9-10-8-6/h2-4H,1H3,(H,8,9,10)	LRUDIIUSNGCQKF-UHFFFAOYSA-N	3	0.0326992	0.12307	0.126009	25.9498	Mulde	Industrial
5-Methyl-1H-benzotriazole	136-85-6	pos	2021	R4	365	[M+H]+	InChI=1S/C7H7N3/c1-5-2-3-6-7(4-5)9-10-8-6/h2-4H,1H3,(H,8,9,10)	LRUDIIUSNGCQKF-UHFFFAOYSA-N	3	0.0128394	0.0535238	0.0545549	23.5348	Rhine	Industrial
5-Methyl-1H-benzotriazole	136-85-6	pos	2021	R3	365	[M+H]+	InChI=1S/C7H7N3/c1-5-2-3-6-7(4-5)9-10-8-6/h2-4H,1H3,(H,8,9,10)	LRUDIIUSNGCQKF-UHFFFAOYSA-N	2	0.00550055	0.0429938	0.0431693	12.7418	Rhine	Industrial
5-Methyl-1H-benzotriazole	136-85-6	pos	2021	Sa	365	[M+H]+	InChI=1S/C7H7N3/c1-5-2-3-6-7(4-5)9-10-8-6/h2-4H,1H3,(H,8,9,10)	LRUDIIUSNGCQKF-UHFFFAOYSA-N	3	0.075325	0.220971	0.230575	32.6683	Saale	Industrial
5-Methyl-1H-benzotriazole	136-85-6	pos	2021	S1	365	[M+H]+	InChI=1S/C7H7N3/c1-5-2-3-6-7(4-5)9-10-8-6/h2-4H,1H3,(H,8,9,10)	LRUDIIUSNGCQKF-UHFFFAOYSA-N	3	0.0433524	0.118785	0.12431	34.8745	Saar	Industrial
5-Methyl-1H-benzotriazole	136-85-6	pos	2021	S2	365	[M+H]+	InChI=1S/C7H7N3/c1-5-2-3-6-7(4-5)9-10-8-6/h2-4H,1H3,(H,8,9,10)	LRUDIIUSNGCQKF-UHFFFAOYSA-N	3	0.0881025	0.218019	0.231573	38.0452	Saar	Industrial
5-Methyl-1H-benzotriazole	136-85-6	pos	2022	E5	365	[M+H]+	InChI=1S/C7H7N3/c1-5-2-3-6-7(4-5)9-10-8-6/h2-4H,1H3,(H,8,9,10)	LRUDIIUSNGCQKF-UHFFFAOYSA-N	3	0.0146715	0.0225525	0.0256724	57.1489	Elbe	Industrial
5-Methyl-1H-benzotriazole	136-85-6	pos	2022	E4	365	[M+H]+	InChI=1S/C7H7N3/c1-5-2-3-6-7(4-5)9-10-8-6/h2-4H,1H3,(H,8,9,10)	LRUDIIUSNGCQKF-UHFFFAOYSA-N	2	0.0103683	0.111568	0.111809	9.27323	Elbe	Industrial
5-Methyl-1H-benzotriazole	136-85-6	pos	2022	E1	365	[M+H]+	InChI=1S/C7H7N3/c1-5-2-3-6-7(4-5)9-10-8-6/h2-4H,1H3,(H,8,9,10)	LRUDIIUSNGCQKF-UHFFFAOYSA-N	3	0.0287372	0.203846	0.205235	14.0021	Elbe	Industrial
5-Methyl-1H-benzotriazole	136-85-6	pos	2022	E2	365	[M+H]+	InChI=1S/C7H7N3/c1-5-2-3-6-7(4-5)9-10-8-6/h2-4H,1H3,(H,8,9,10)	LRUDIIUSNGCQKF-UHFFFAOYSA-N	3	0.0201729	0.106947	0.108151	18.6526	Elbe	Industrial
5-Methyl-1H-benzotriazole	136-85-6	pos	2022	Mu	365	[M+H]+	InChI=1S/C7H7N3/c1-5-2-3-6-7(4-5)9-10-8-6/h2-4H,1H3,(H,8,9,10)	LRUDIIUSNGCQKF-UHFFFAOYSA-N	3	0.014576	0.074859	0.0757351	19.246	Mulde	Industrial
5-Methyl-1H-benzotriazole	136-85-6	pos	2022	R4	365	[M+H]+	InChI=1S/C7H7N3/c1-5-2-3-6-7(4-5)9-10-8-6/h2-4H,1H3,(H,8,9,10)	LRUDIIUSNGCQKF-UHFFFAOYSA-N	3	0.017829	0.101295	0.102397	17.4117	Rhine	Industrial
5-Methyl-1H-benzotriazole	136-85-6	pos	2022	R3	365	[M+H]+	InChI=1S/C7H7N3/c1-5-2-3-6-7(4-5)9-10-8-6/h2-4H,1H3,(H,8,9,10)	LRUDIIUSNGCQKF-UHFFFAOYSA-N	3	0.032941	0.0610873	0.0660622	49.8635	Rhine	Industrial
5-Methyl-1H-benzotriazole	136-85-6	pos	2022	Sa	365	[M+H]+	InChI=1S/C7H7N3/c1-5-2-3-6-7(4-5)9-10-8-6/h2-4H,1H3,(H,8,9,10)	LRUDIIUSNGCQKF-UHFFFAOYSA-N	3	0.0121163	0.287608	0.287779	4.21027	Saale	Industrial
5-Methyl-1H-benzotriazole	136-85-6	pos	2022	S1	365	[M+H]+	InChI=1S/C7H7N3/c1-5-2-3-6-7(4-5)9-10-8-6/h2-4H,1H3,(H,8,9,10)	LRUDIIUSNGCQKF-UHFFFAOYSA-N	3	0.0488809	0.118952	0.125577	38.925	Saar	Industrial
5-Methyl-1H-benzotriazole	136-85-6	pos	2022	S2	365	[M+H]+	InChI=1S/C7H7N3/c1-5-2-3-6-7(4-5)9-10-8-6/h2-4H,1H3,(H,8,9,10)	LRUDIIUSNGCQKF-UHFFFAOYSA-N	3	0.0913995	0.201821	0.21692	42.1352	Saar	Industrial
6PPD-quinone	2754428-18-5	pos	2005	E2	365	[M+H]+	InChI=1S/C18H22N2O2/c1-12(2)9-13(3)19-15-10-18(22)16(11-17(15)21)20-14-7-5-4-6-8-14/h4-8,10-13,19-20H,9H2,1-3H3	UBMGKRIXKUIXFQ-UHFFFAOYSA-N	3	0.0105396	0.138901	0.139161	7.5737	Elbe	other
6PPD-quinone	2754428-18-5	pos	2005	Mu	365	[M+H]+	InChI=1S/C18H22N2O2/c1-12(2)9-13(3)19-15-10-18(22)16(11-17(15)21)20-14-7-5-4-6-8-14/h4-8,10-13,19-20H,9H2,1-3H3	UBMGKRIXKUIXFQ-UHFFFAOYSA-N	2	0.00605501	0.0391357	0.0393693	15.38	Mulde	other
6PPD-quinone	2754428-18-5	pos	2005	R4	365	[M+H]+	InChI=1S/C18H22N2O2/c1-12(2)9-13(3)19-15-10-18(22)16(11-17(15)21)20-14-7-5-4-6-8-14/h4-8,10-13,19-20H,9H2,1-3H3	UBMGKRIXKUIXFQ-UHFFFAOYSA-N	3	0.0213104	0.421006	0.421362	5.05752	Rhine	other
6PPD-quinone	2754428-18-5	pos	2005	R3	365	[M+H]+	InChI=1S/C18H22N2O2/c1-12(2)9-13(3)19-15-10-18(22)16(11-17(15)21)20-14-7-5-4-6-8-14/h4-8,10-13,19-20H,9H2,1-3H3	UBMGKRIXKUIXFQ-UHFFFAOYSA-N	3	0.041816	0.258928	0.261208	16.0087	Rhine	other
6PPD-quinone	2754428-18-5	pos	2005	R1	365	[M+H]+	InChI=1S/C18H22N2O2/c1-12(2)9-13(3)19-15-10-18(22)16(11-17(15)21)20-14-7-5-4-6-8-14/h4-8,10-13,19-20H,9H2,1-3H3	UBMGKRIXKUIXFQ-UHFFFAOYSA-N	3	0.0674311	0.726458	0.7286	9.25489	Rhine	other
6PPD-quinone	2754428-18-5	pos	2005	Sa	365	[M+H]+	InChI=1S/C18H22N2O2/c1-12(2)9-13(3)19-15-10-18(22)16(11-17(15)21)20-14-7-5-4-6-8-14/h4-8,10-13,19-20H,9H2,1-3H3	UBMGKRIXKUIXFQ-UHFFFAOYSA-N	3	0.0399616	0.332155	0.333794	11.9719	Saale	other
6PPD-quinone	2754428-18-5	pos	2006	E2	365	[M+H]+	InChI=1S/C18H22N2O2/c1-12(2)9-13(3)19-15-10-18(22)16(11-17(15)21)20-14-7-5-4-6-8-14/h4-8,10-13,19-20H,9H2,1-3H3	UBMGKRIXKUIXFQ-UHFFFAOYSA-N	3	0.00704886	0.0697332	0.0699628	10.0752	Elbe	other
6PPD-quinone	2754428-18-5	pos	2006	Mu	365	[M+H]+	InChI=1S/C18H22N2O2/c1-12(2)9-13(3)19-15-10-18(22)16(11-17(15)21)20-14-7-5-4-6-8-14/h4-8,10-13,19-20H,9H2,1-3H3	UBMGKRIXKUIXFQ-UHFFFAOYSA-N	2	0.00685422	0.0868682	0.0870033	7.87811	Mulde	other
6PPD-quinone	2754428-18-5	pos	2006	R4	365	[M+H]+	InChI=1S/C18H22N2O2/c1-12(2)9-13(3)19-15-10-18(22)16(11-17(15)21)20-14-7-5-4-6-8-14/h4-8,10-13,19-20H,9H2,1-3H3	UBMGKRIXKUIXFQ-UHFFFAOYSA-N	3	0.0398025	0.520315	0.52134	7.63464	Rhine	other
6PPD-quinone	2754428-18-5	pos	2006	R3	365	[M+H]+	InChI=1S/C18H22N2O2/c1-12(2)9-13(3)19-15-10-18(22)16(11-17(15)21)20-14-7-5-4-6-8-14/h4-8,10-13,19-20H,9H2,1-3H3	UBMGKRIXKUIXFQ-UHFFFAOYSA-N	3	0.020401	0.370956	0.371323	5.49414	Rhine	other
6PPD-quinone	2754428-18-5	pos	2006	R1	365	[M+H]+	InChI=1S/C18H22N2O2/c1-12(2)9-13(3)19-15-10-18(22)16(11-17(15)21)20-14-7-5-4-6-8-14/h4-8,10-13,19-20H,9H2,1-3H3	UBMGKRIXKUIXFQ-UHFFFAOYSA-N	3	0.274285	0.659883	0.692144	39.6283	Rhine	other
6PPD-quinone	2754428-18-5	pos	2006	Sa	365	[M+H]+	InChI=1S/C18H22N2O2/c1-12(2)9-13(3)19-15-10-18(22)16(11-17(15)21)20-14-7-5-4-6-8-14/h4-8,10-13,19-20H,9H2,1-3H3	UBMGKRIXKUIXFQ-UHFFFAOYSA-N	3	0.0589154	0.263786	0.26827	21.9612	Saale	other
6PPD-quinone	2754428-18-5	pos	2006	S1	365	[M+H]+	InChI=1S/C18H22N2O2/c1-12(2)9-13(3)19-15-10-18(22)16(11-17(15)21)20-14-7-5-4-6-8-14/h4-8,10-13,19-20H,9H2,1-3H3	UBMGKRIXKUIXFQ-UHFFFAOYSA-N	3	0.284541	0.766649	0.802656	35.4499	Saar	other
6PPD-quinone	2754428-18-5	pos	2006	S2	365	[M+H]+	InChI=1S/C18H22N2O2/c1-12(2)9-13(3)19-15-10-18(22)16(11-17(15)21)20-14-7-5-4-6-8-14/h4-8,10-13,19-20H,9H2,1-3H3	UBMGKRIXKUIXFQ-UHFFFAOYSA-N	3	0.212426	3.09044	3.09522	6.86304	Saar	other
6PPD-quinone	2754428-18-5	pos	2007	E2	365	[M+H]+	InChI=1S/C18H22N2O2/c1-12(2)9-13(3)19-15-10-18(22)16(11-17(15)21)20-14-7-5-4-6-8-14/h4-8,10-13,19-20H,9H2,1-3H3	UBMGKRIXKUIXFQ-UHFFFAOYSA-N	3	0.0483586	0.180758	0.185081	26.1283	Elbe	other
6PPD-quinone	2754428-18-5	pos	2007	Mu	365	[M+H]+	InChI=1S/C18H22N2O2/c1-12(2)9-13(3)19-15-10-18(22)16(11-17(15)21)20-14-7-5-4-6-8-14/h4-8,10-13,19-20H,9H2,1-3H3	UBMGKRIXKUIXFQ-UHFFFAOYSA-N	2	0.00672827	0.0922701	0.0923927	7.28225	Mulde	other
6PPD-quinone	2754428-18-5	pos	2007	R4	365	[M+H]+	InChI=1S/C18H22N2O2/c1-12(2)9-13(3)19-15-10-18(22)16(11-17(15)21)20-14-7-5-4-6-8-14/h4-8,10-13,19-20H,9H2,1-3H3	UBMGKRIXKUIXFQ-UHFFFAOYSA-N	3	0.0230478	0.548575	0.548902	4.19889	Rhine	other
6PPD-quinone	2754428-18-5	pos	2007	R3	365	[M+H]+	InChI=1S/C18H22N2O2/c1-12(2)9-13(3)19-15-10-18(22)16(11-17(15)21)20-14-7-5-4-6-8-14/h4-8,10-13,19-20H,9H2,1-3H3	UBMGKRIXKUIXFQ-UHFFFAOYSA-N	3	0.0323753	0.425789	0.426588	7.58938	Rhine	other
6PPD-quinone	2754428-18-5	pos	2007	R1	365	[M+H]+	InChI=1S/C18H22N2O2/c1-12(2)9-13(3)19-15-10-18(22)16(11-17(15)21)20-14-7-5-4-6-8-14/h4-8,10-13,19-20H,9H2,1-3H3	UBMGKRIXKUIXFQ-UHFFFAOYSA-N	3	0.0477424	0.636867	0.638041	7.48265	Rhine	other
6PPD-quinone	2754428-18-5	pos	2007	Sa	365	[M+H]+	InChI=1S/C18H22N2O2/c1-12(2)9-13(3)19-15-10-18(22)16(11-17(15)21)20-14-7-5-4-6-8-14/h4-8,10-13,19-20H,9H2,1-3H3	UBMGKRIXKUIXFQ-UHFFFAOYSA-N	2	0.0275478	0.369189	0.369703	7.45134	Saale	other
6PPD-quinone	2754428-18-5	pos	2007	S1	365	[M+H]+	InChI=1S/C18H22N2O2/c1-12(2)9-13(3)19-15-10-18(22)16(11-17(15)21)20-14-7-5-4-6-8-14/h4-8,10-13,19-20H,9H2,1-3H3	UBMGKRIXKUIXFQ-UHFFFAOYSA-N	3	0.237093	0.570667	0.603932	39.2583	Saar	other
6PPD-quinone	2754428-18-5	pos	2007	S2	365	[M+H]+	InChI=1S/C18H22N2O2/c1-12(2)9-13(3)19-15-10-18(22)16(11-17(15)21)20-14-7-5-4-6-8-14/h4-8,10-13,19-20H,9H2,1-3H3	UBMGKRIXKUIXFQ-UHFFFAOYSA-N	3	0.250329	2.37122	2.37987	10.5186	Saar	other
6PPD-quinone	2754428-18-5	pos	2008	E2	365	[M+H]+	InChI=1S/C18H22N2O2/c1-12(2)9-13(3)19-15-10-18(22)16(11-17(15)21)20-14-7-5-4-6-8-14/h4-8,10-13,19-20H,9H2,1-3H3	UBMGKRIXKUIXFQ-UHFFFAOYSA-N	3	0.00618051	0.205937	0.205998	3.00028	Elbe	other
6PPD-quinone	2754428-18-5	pos	2008	R4	365	[M+H]+	InChI=1S/C18H22N2O2/c1-12(2)9-13(3)19-15-10-18(22)16(11-17(15)21)20-14-7-5-4-6-8-14/h4-8,10-13,19-20H,9H2,1-3H3	UBMGKRIXKUIXFQ-UHFFFAOYSA-N	3	0.0253405	0.457309	0.457777	5.53555	Rhine	other
6PPD-quinone	2754428-18-5	pos	2008	R3	365	[M+H]+	InChI=1S/C18H22N2O2/c1-12(2)9-13(3)19-15-10-18(22)16(11-17(15)21)20-14-7-5-4-6-8-14/h4-8,10-13,19-20H,9H2,1-3H3	UBMGKRIXKUIXFQ-UHFFFAOYSA-N	3	0.0155852	0.452493	0.452673	3.44292	Rhine	other
6PPD-quinone	2754428-18-5	pos	2008	R1	365	[M+H]+	InChI=1S/C18H22N2O2/c1-12(2)9-13(3)19-15-10-18(22)16(11-17(15)21)20-14-7-5-4-6-8-14/h4-8,10-13,19-20H,9H2,1-3H3	UBMGKRIXKUIXFQ-UHFFFAOYSA-N	3	0.0701892	0.719758	0.722014	9.72131	Rhine	other
6PPD-quinone	2754428-18-5	pos	2008	Sa	365	[M+H]+	InChI=1S/C18H22N2O2/c1-12(2)9-13(3)19-15-10-18(22)16(11-17(15)21)20-14-7-5-4-6-8-14/h4-8,10-13,19-20H,9H2,1-3H3	UBMGKRIXKUIXFQ-UHFFFAOYSA-N	2	0.0213936	0.31065	0.311018	6.87858	Saale	other
6PPD-quinone	2754428-18-5	pos	2008	S1	365	[M+H]+	InChI=1S/C18H22N2O2/c1-12(2)9-13(3)19-15-10-18(22)16(11-17(15)21)20-14-7-5-4-6-8-14/h4-8,10-13,19-20H,9H2,1-3H3	UBMGKRIXKUIXFQ-UHFFFAOYSA-N	3	0.43659	0.99342	1.05746	41.2865	Saar	other
6PPD-quinone	2754428-18-5	pos	2008	S2	365	[M+H]+	InChI=1S/C18H22N2O2/c1-12(2)9-13(3)19-15-10-18(22)16(11-17(15)21)20-14-7-5-4-6-8-14/h4-8,10-13,19-20H,9H2,1-3H3	UBMGKRIXKUIXFQ-UHFFFAOYSA-N	3	0.142874	2.81742	2.81981	5.0668	Saar	other
6PPD-quinone	2754428-18-5	pos	2009	E2	365	[M+H]+	InChI=1S/C18H22N2O2/c1-12(2)9-13(3)19-15-10-18(22)16(11-17(15)21)20-14-7-5-4-6-8-14/h4-8,10-13,19-20H,9H2,1-3H3	UBMGKRIXKUIXFQ-UHFFFAOYSA-N	3	0.0395425	0.195459	0.197971	19.9738	Elbe	other
6PPD-quinone	2754428-18-5	pos	2009	R4	365	[M+H]+	InChI=1S/C18H22N2O2/c1-12(2)9-13(3)19-15-10-18(22)16(11-17(15)21)20-14-7-5-4-6-8-14/h4-8,10-13,19-20H,9H2,1-3H3	UBMGKRIXKUIXFQ-UHFFFAOYSA-N	3	0.0238836	0.466564	0.46697	5.1146	Rhine	other
6PPD-quinone	2754428-18-5	pos	2009	R3	365	[M+H]+	InChI=1S/C18H22N2O2/c1-12(2)9-13(3)19-15-10-18(22)16(11-17(15)21)20-14-7-5-4-6-8-14/h4-8,10-13,19-20H,9H2,1-3H3	UBMGKRIXKUIXFQ-UHFFFAOYSA-N	3	0.0331625	0.513963	0.514687	6.44325	Rhine	other
6PPD-quinone	2754428-18-5	pos	2009	R1	365	[M+H]+	InChI=1S/C18H22N2O2/c1-12(2)9-13(3)19-15-10-18(22)16(11-17(15)21)20-14-7-5-4-6-8-14/h4-8,10-13,19-20H,9H2,1-3H3	UBMGKRIXKUIXFQ-UHFFFAOYSA-N	3	0.0583223	0.933839	0.935059	6.23729	Rhine	other
6PPD-quinone	2754428-18-5	pos	2009	Sa	365	[M+H]+	InChI=1S/C18H22N2O2/c1-12(2)9-13(3)19-15-10-18(22)16(11-17(15)21)20-14-7-5-4-6-8-14/h4-8,10-13,19-20H,9H2,1-3H3	UBMGKRIXKUIXFQ-UHFFFAOYSA-N	3	0.0695716	0.2731	0.279502	24.8913	Saale	other
6PPD-quinone	2754428-18-5	pos	2009	S1	365	[M+H]+	InChI=1S/C18H22N2O2/c1-12(2)9-13(3)19-15-10-18(22)16(11-17(15)21)20-14-7-5-4-6-8-14/h4-8,10-13,19-20H,9H2,1-3H3	UBMGKRIXKUIXFQ-UHFFFAOYSA-N	3	0.297974	0.911299	0.947008	31.4648	Saar	other
6PPD-quinone	2754428-18-5	pos	2009	S2	365	[M+H]+	InChI=1S/C18H22N2O2/c1-12(2)9-13(3)19-15-10-18(22)16(11-17(15)21)20-14-7-5-4-6-8-14/h4-8,10-13,19-20H,9H2,1-3H3	UBMGKRIXKUIXFQ-UHFFFAOYSA-N	3	0.306354	2.81849	2.82916	10.8285	Saar	other
6PPD-quinone	2754428-18-5	pos	2010	E2	365	[M+H]+	InChI=1S/C18H22N2O2/c1-12(2)9-13(3)19-15-10-18(22)16(11-17(15)21)20-14-7-5-4-6-8-14/h4-8,10-13,19-20H,9H2,1-3H3	UBMGKRIXKUIXFQ-UHFFFAOYSA-N	3	0.0191114	0.145306	0.146178	13.0741	Elbe	other
6PPD-quinone	2754428-18-5	pos	2010	Mu	365	[M+H]+	InChI=1S/C18H22N2O2/c1-12(2)9-13(3)19-15-10-18(22)16(11-17(15)21)20-14-7-5-4-6-8-14/h4-8,10-13,19-20H,9H2,1-3H3	UBMGKRIXKUIXFQ-UHFFFAOYSA-N	2	0.015694	0.102226	0.102827	15.2626	Mulde	other
6PPD-quinone	2754428-18-5	pos	2010	R4	365	[M+H]+	InChI=1S/C18H22N2O2/c1-12(2)9-13(3)19-15-10-18(22)16(11-17(15)21)20-14-7-5-4-6-8-14/h4-8,10-13,19-20H,9H2,1-3H3	UBMGKRIXKUIXFQ-UHFFFAOYSA-N	3	0.0210771	0.526871	0.527151	3.99831	Rhine	other
6PPD-quinone	2754428-18-5	pos	2010	R3	365	[M+H]+	InChI=1S/C18H22N2O2/c1-12(2)9-13(3)19-15-10-18(22)16(11-17(15)21)20-14-7-5-4-6-8-14/h4-8,10-13,19-20H,9H2,1-3H3	UBMGKRIXKUIXFQ-UHFFFAOYSA-N	3	0.0116966	0.560926	0.561007	2.08493	Rhine	other
6PPD-quinone	2754428-18-5	pos	2010	R1	365	[M+H]+	InChI=1S/C18H22N2O2/c1-12(2)9-13(3)19-15-10-18(22)16(11-17(15)21)20-14-7-5-4-6-8-14/h4-8,10-13,19-20H,9H2,1-3H3	UBMGKRIXKUIXFQ-UHFFFAOYSA-N	3	0.0873493	0.71155	0.715183	12.2136	Rhine	other
6PPD-quinone	2754428-18-5	pos	2010	Sa	365	[M+H]+	InChI=1S/C18H22N2O2/c1-12(2)9-13(3)19-15-10-18(22)16(11-17(15)21)20-14-7-5-4-6-8-14/h4-8,10-13,19-20H,9H2,1-3H3	UBMGKRIXKUIXFQ-UHFFFAOYSA-N	2	0.0785736	0.301191	0.306272	25.6548	Saale	other
6PPD-quinone	2754428-18-5	pos	2010	S1	365	[M+H]+	InChI=1S/C18H22N2O2/c1-12(2)9-13(3)19-15-10-18(22)16(11-17(15)21)20-14-7-5-4-6-8-14/h4-8,10-13,19-20H,9H2,1-3H3	UBMGKRIXKUIXFQ-UHFFFAOYSA-N	3	0.273794	0.62933	0.668522	40.9551	Saar	other
6PPD-quinone	2754428-18-5	pos	2010	S2	365	[M+H]+	InChI=1S/C18H22N2O2/c1-12(2)9-13(3)19-15-10-18(22)16(11-17(15)21)20-14-7-5-4-6-8-14/h4-8,10-13,19-20H,9H2,1-3H3	UBMGKRIXKUIXFQ-UHFFFAOYSA-N	3	0.247527	2.27867	2.28727	10.8219	Saar	other
6PPD-quinone	2754428-18-5	pos	2011	E2	365	[M+H]+	InChI=1S/C18H22N2O2/c1-12(2)9-13(3)19-15-10-18(22)16(11-17(15)21)20-14-7-5-4-6-8-14/h4-8,10-13,19-20H,9H2,1-3H3	UBMGKRIXKUIXFQ-UHFFFAOYSA-N	3	0.0156976	0.141995	0.142584	11.0093	Elbe	other
6PPD-quinone	2754428-18-5	pos	2011	R4	365	[M+H]+	InChI=1S/C18H22N2O2/c1-12(2)9-13(3)19-15-10-18(22)16(11-17(15)21)20-14-7-5-4-6-8-14/h4-8,10-13,19-20H,9H2,1-3H3	UBMGKRIXKUIXFQ-UHFFFAOYSA-N	3	0.056741	0.425745	0.428297	13.248	Rhine	other
6PPD-quinone	2754428-18-5	pos	2011	R3	365	[M+H]+	InChI=1S/C18H22N2O2/c1-12(2)9-13(3)19-15-10-18(22)16(11-17(15)21)20-14-7-5-4-6-8-14/h4-8,10-13,19-20H,9H2,1-3H3	UBMGKRIXKUIXFQ-UHFFFAOYSA-N	3	0.071653	0.424622	0.428822	16.7093	Rhine	other
6PPD-quinone	2754428-18-5	pos	2011	R1	365	[M+H]+	InChI=1S/C18H22N2O2/c1-12(2)9-13(3)19-15-10-18(22)16(11-17(15)21)20-14-7-5-4-6-8-14/h4-8,10-13,19-20H,9H2,1-3H3	UBMGKRIXKUIXFQ-UHFFFAOYSA-N	3	0.084716	0.793126	0.796075	10.6417	Rhine	other
6PPD-quinone	2754428-18-5	pos	2011	Sa	365	[M+H]+	InChI=1S/C18H22N2O2/c1-12(2)9-13(3)19-15-10-18(22)16(11-17(15)21)20-14-7-5-4-6-8-14/h4-8,10-13,19-20H,9H2,1-3H3	UBMGKRIXKUIXFQ-UHFFFAOYSA-N	2	0.00606285	0.317984	0.318013	1.90648	Saale	other
6PPD-quinone	2754428-18-5	pos	2011	S1	365	[M+H]+	InChI=1S/C18H22N2O2/c1-12(2)9-13(3)19-15-10-18(22)16(11-17(15)21)20-14-7-5-4-6-8-14/h4-8,10-13,19-20H,9H2,1-3H3	UBMGKRIXKUIXFQ-UHFFFAOYSA-N	3	0.130345	0.589388	0.598906	21.7638	Saar	other
6PPD-quinone	2754428-18-5	pos	2011	S2	365	[M+H]+	InChI=1S/C18H22N2O2/c1-12(2)9-13(3)19-15-10-18(22)16(11-17(15)21)20-14-7-5-4-6-8-14/h4-8,10-13,19-20H,9H2,1-3H3	UBMGKRIXKUIXFQ-UHFFFAOYSA-N	3	0.146334	1.84491	1.84879	7.91511	Saar	other
6PPD-quinone	2754428-18-5	pos	2012	E2	365	[M+H]+	InChI=1S/C18H22N2O2/c1-12(2)9-13(3)19-15-10-18(22)16(11-17(15)21)20-14-7-5-4-6-8-14/h4-8,10-13,19-20H,9H2,1-3H3	UBMGKRIXKUIXFQ-UHFFFAOYSA-N	3	0.0111683	0.177705	0.177935	6.2766	Elbe	other
6PPD-quinone	2754428-18-5	pos	2012	Mu	365	[M+H]+	InChI=1S/C18H22N2O2/c1-12(2)9-13(3)19-15-10-18(22)16(11-17(15)21)20-14-7-5-4-6-8-14/h4-8,10-13,19-20H,9H2,1-3H3	UBMGKRIXKUIXFQ-UHFFFAOYSA-N	2	0.024459	0.127444	0.128612	19.0176	Mulde	other
6PPD-quinone	2754428-18-5	pos	2012	R4	365	[M+H]+	InChI=1S/C18H22N2O2/c1-12(2)9-13(3)19-15-10-18(22)16(11-17(15)21)20-14-7-5-4-6-8-14/h4-8,10-13,19-20H,9H2,1-3H3	UBMGKRIXKUIXFQ-UHFFFAOYSA-N	3	0.0238843	0.577401	0.577727	4.13418	Rhine	other
6PPD-quinone	2754428-18-5	pos	2012	R3	365	[M+H]+	InChI=1S/C18H22N2O2/c1-12(2)9-13(3)19-15-10-18(22)16(11-17(15)21)20-14-7-5-4-6-8-14/h4-8,10-13,19-20H,9H2,1-3H3	UBMGKRIXKUIXFQ-UHFFFAOYSA-N	3	0.0225202	0.524201	0.524528	4.29342	Rhine	other
6PPD-quinone	2754428-18-5	pos	2012	R1	365	[M+H]+	InChI=1S/C18H22N2O2/c1-12(2)9-13(3)19-15-10-18(22)16(11-17(15)21)20-14-7-5-4-6-8-14/h4-8,10-13,19-20H,9H2,1-3H3	UBMGKRIXKUIXFQ-UHFFFAOYSA-N	3	0.0520444	0.655062	0.65645	7.92816	Rhine	other
6PPD-quinone	2754428-18-5	pos	2012	Sa	365	[M+H]+	InChI=1S/C18H22N2O2/c1-12(2)9-13(3)19-15-10-18(22)16(11-17(15)21)20-14-7-5-4-6-8-14/h4-8,10-13,19-20H,9H2,1-3H3	UBMGKRIXKUIXFQ-UHFFFAOYSA-N	2	0.0182381	0.284919	0.285211	6.3946	Saale	other
6PPD-quinone	2754428-18-5	pos	2012	S1	365	[M+H]+	InChI=1S/C18H22N2O2/c1-12(2)9-13(3)19-15-10-18(22)16(11-17(15)21)20-14-7-5-4-6-8-14/h4-8,10-13,19-20H,9H2,1-3H3	UBMGKRIXKUIXFQ-UHFFFAOYSA-N	3	0.145757	0.72772	0.737914	19.7525	Saar	other
6PPD-quinone	2754428-18-5	pos	2012	S2	365	[M+H]+	InChI=1S/C18H22N2O2/c1-12(2)9-13(3)19-15-10-18(22)16(11-17(15)21)20-14-7-5-4-6-8-14/h4-8,10-13,19-20H,9H2,1-3H3	UBMGKRIXKUIXFQ-UHFFFAOYSA-N	3	0.271024	3.35311	3.36018	8.06573	Saar	other
6PPD-quinone	2754428-18-5	pos	2013	E2	365	[M+H]+	InChI=1S/C18H22N2O2/c1-12(2)9-13(3)19-15-10-18(22)16(11-17(15)21)20-14-7-5-4-6-8-14/h4-8,10-13,19-20H,9H2,1-3H3	UBMGKRIXKUIXFQ-UHFFFAOYSA-N	3	0.13958	0.299899	0.325025	42.9445	Elbe	other
6PPD-quinone	2754428-18-5	pos	2013	Mu	365	[M+H]+	InChI=1S/C18H22N2O2/c1-12(2)9-13(3)19-15-10-18(22)16(11-17(15)21)20-14-7-5-4-6-8-14/h4-8,10-13,19-20H,9H2,1-3H3	UBMGKRIXKUIXFQ-UHFFFAOYSA-N	3	0.0767908	0.196018	0.207365	37.0317	Mulde	other
6PPD-quinone	2754428-18-5	pos	2013	R4	365	[M+H]+	InChI=1S/C18H22N2O2/c1-12(2)9-13(3)19-15-10-18(22)16(11-17(15)21)20-14-7-5-4-6-8-14/h4-8,10-13,19-20H,9H2,1-3H3	UBMGKRIXKUIXFQ-UHFFFAOYSA-N	3	0.0273035	0.499372	0.499878	5.46204	Rhine	other
6PPD-quinone	2754428-18-5	pos	2013	R3	365	[M+H]+	InChI=1S/C18H22N2O2/c1-12(2)9-13(3)19-15-10-18(22)16(11-17(15)21)20-14-7-5-4-6-8-14/h4-8,10-13,19-20H,9H2,1-3H3	UBMGKRIXKUIXFQ-UHFFFAOYSA-N	3	0.0631517	0.467812	0.470721	13.4159	Rhine	other
6PPD-quinone	2754428-18-5	pos	2013	R1	365	[M+H]+	InChI=1S/C18H22N2O2/c1-12(2)9-13(3)19-15-10-18(22)16(11-17(15)21)20-14-7-5-4-6-8-14/h4-8,10-13,19-20H,9H2,1-3H3	UBMGKRIXKUIXFQ-UHFFFAOYSA-N	3	0.0795579	0.71162	0.714685	11.1319	Rhine	other
6PPD-quinone	2754428-18-5	pos	2013	Sa	365	[M+H]+	InChI=1S/C18H22N2O2/c1-12(2)9-13(3)19-15-10-18(22)16(11-17(15)21)20-14-7-5-4-6-8-14/h4-8,10-13,19-20H,9H2,1-3H3	UBMGKRIXKUIXFQ-UHFFFAOYSA-N	3	0.109599	0.54885	0.556658	19.6887	Saale	other
6PPD-quinone	2754428-18-5	pos	2013	S1	365	[M+H]+	InChI=1S/C18H22N2O2/c1-12(2)9-13(3)19-15-10-18(22)16(11-17(15)21)20-14-7-5-4-6-8-14/h4-8,10-13,19-20H,9H2,1-3H3	UBMGKRIXKUIXFQ-UHFFFAOYSA-N	3	0.304581	0.504106	0.577426	52.7481	Saar	other
6PPD-quinone	2754428-18-5	pos	2013	S2	365	[M+H]+	InChI=1S/C18H22N2O2/c1-12(2)9-13(3)19-15-10-18(22)16(11-17(15)21)20-14-7-5-4-6-8-14/h4-8,10-13,19-20H,9H2,1-3H3	UBMGKRIXKUIXFQ-UHFFFAOYSA-N	3	0.138531	2.26276	2.26565	6.1144	Saar	other
6PPD-quinone	2754428-18-5	pos	2014	E2	365	[M+H]+	InChI=1S/C18H22N2O2/c1-12(2)9-13(3)19-15-10-18(22)16(11-17(15)21)20-14-7-5-4-6-8-14/h4-8,10-13,19-20H,9H2,1-3H3	UBMGKRIXKUIXFQ-UHFFFAOYSA-N	3	0.144316	0.311779	0.337607	42.7468	Elbe	other
6PPD-quinone	2754428-18-5	pos	2014	Mu	365	[M+H]+	InChI=1S/C18H22N2O2/c1-12(2)9-13(3)19-15-10-18(22)16(11-17(15)21)20-14-7-5-4-6-8-14/h4-8,10-13,19-20H,9H2,1-3H3	UBMGKRIXKUIXFQ-UHFFFAOYSA-N	3	0.0614924	0.159195	0.166865	36.8517	Mulde	other
6PPD-quinone	2754428-18-5	pos	2014	R4	365	[M+H]+	InChI=1S/C18H22N2O2/c1-12(2)9-13(3)19-15-10-18(22)16(11-17(15)21)20-14-7-5-4-6-8-14/h4-8,10-13,19-20H,9H2,1-3H3	UBMGKRIXKUIXFQ-UHFFFAOYSA-N	3	0.0347852	0.537603	0.53837	6.4612	Rhine	other
6PPD-quinone	2754428-18-5	pos	2014	R3	365	[M+H]+	InChI=1S/C18H22N2O2/c1-12(2)9-13(3)19-15-10-18(22)16(11-17(15)21)20-14-7-5-4-6-8-14/h4-8,10-13,19-20H,9H2,1-3H3	UBMGKRIXKUIXFQ-UHFFFAOYSA-N	3	0.0324699	0.29088	0.292134	11.1147	Rhine	other
6PPD-quinone	2754428-18-5	pos	2014	R1	365	[M+H]+	InChI=1S/C18H22N2O2/c1-12(2)9-13(3)19-15-10-18(22)16(11-17(15)21)20-14-7-5-4-6-8-14/h4-8,10-13,19-20H,9H2,1-3H3	UBMGKRIXKUIXFQ-UHFFFAOYSA-N	3	0.0624569	0.877464	0.878919	7.1061	Rhine	other
6PPD-quinone	2754428-18-5	pos	2014	Sa	365	[M+H]+	InChI=1S/C18H22N2O2/c1-12(2)9-13(3)19-15-10-18(22)16(11-17(15)21)20-14-7-5-4-6-8-14/h4-8,10-13,19-20H,9H2,1-3H3	UBMGKRIXKUIXFQ-UHFFFAOYSA-N	3	0.252763	0.518416	0.560106	45.1277	Saale	other
6PPD-quinone	2754428-18-5	pos	2014	S1	365	[M+H]+	InChI=1S/C18H22N2O2/c1-12(2)9-13(3)19-15-10-18(22)16(11-17(15)21)20-14-7-5-4-6-8-14/h4-8,10-13,19-20H,9H2,1-3H3	UBMGKRIXKUIXFQ-UHFFFAOYSA-N	3	0.0834655	0.443652	0.448532	18.6086	Saar	other
6PPD-quinone	2754428-18-5	pos	2014	S2	365	[M+H]+	InChI=1S/C18H22N2O2/c1-12(2)9-13(3)19-15-10-18(22)16(11-17(15)21)20-14-7-5-4-6-8-14/h4-8,10-13,19-20H,9H2,1-3H3	UBMGKRIXKUIXFQ-UHFFFAOYSA-N	3	0.219249	1.09495	1.11001	19.7521	Saar	other
6PPD-quinone	2754428-18-5	pos	2015	E2	365	[M+H]+	InChI=1S/C18H22N2O2/c1-12(2)9-13(3)19-15-10-18(22)16(11-17(15)21)20-14-7-5-4-6-8-14/h4-8,10-13,19-20H,9H2,1-3H3	UBMGKRIXKUIXFQ-UHFFFAOYSA-N	3	0.0986993	0.475855	0.482463	20.4574	Elbe	other
6PPD-quinone	2754428-18-5	pos	2015	Mu	365	[M+H]+	InChI=1S/C18H22N2O2/c1-12(2)9-13(3)19-15-10-18(22)16(11-17(15)21)20-14-7-5-4-6-8-14/h4-8,10-13,19-20H,9H2,1-3H3	UBMGKRIXKUIXFQ-UHFFFAOYSA-N	2	0.0157059	0.231619	0.231885	6.77312	Mulde	other
6PPD-quinone	2754428-18-5	pos	2015	R4	365	[M+H]+	InChI=1S/C18H22N2O2/c1-12(2)9-13(3)19-15-10-18(22)16(11-17(15)21)20-14-7-5-4-6-8-14/h4-8,10-13,19-20H,9H2,1-3H3	UBMGKRIXKUIXFQ-UHFFFAOYSA-N	3	0.0517109	0.647303	0.648649	7.9721	Rhine	other
6PPD-quinone	2754428-18-5	pos	2015	R3	365	[M+H]+	InChI=1S/C18H22N2O2/c1-12(2)9-13(3)19-15-10-18(22)16(11-17(15)21)20-14-7-5-4-6-8-14/h4-8,10-13,19-20H,9H2,1-3H3	UBMGKRIXKUIXFQ-UHFFFAOYSA-N	3	0.0253478	0.256666	0.257522	9.84296	Rhine	other
6PPD-quinone	2754428-18-5	pos	2015	R1	365	[M+H]+	InChI=1S/C18H22N2O2/c1-12(2)9-13(3)19-15-10-18(22)16(11-17(15)21)20-14-7-5-4-6-8-14/h4-8,10-13,19-20H,9H2,1-3H3	UBMGKRIXKUIXFQ-UHFFFAOYSA-N	3	0.0906781	0.543629	0.548745	16.5246	Rhine	other
6PPD-quinone	2754428-18-5	pos	2015	Sa	365	[M+H]+	InChI=1S/C18H22N2O2/c1-12(2)9-13(3)19-15-10-18(22)16(11-17(15)21)20-14-7-5-4-6-8-14/h4-8,10-13,19-20H,9H2,1-3H3	UBMGKRIXKUIXFQ-UHFFFAOYSA-N	3	0.188983	0.57943	0.602242	31.3799	Saale	other
6PPD-quinone	2754428-18-5	pos	2015	S1	365	[M+H]+	InChI=1S/C18H22N2O2/c1-12(2)9-13(3)19-15-10-18(22)16(11-17(15)21)20-14-7-5-4-6-8-14/h4-8,10-13,19-20H,9H2,1-3H3	UBMGKRIXKUIXFQ-UHFFFAOYSA-N	3	0.287286	0.514974	0.575373	49.9304	Saar	other
6PPD-quinone	2754428-18-5	pos	2015	S2	365	[M+H]+	InChI=1S/C18H22N2O2/c1-12(2)9-13(3)19-15-10-18(22)16(11-17(15)21)20-14-7-5-4-6-8-14/h4-8,10-13,19-20H,9H2,1-3H3	UBMGKRIXKUIXFQ-UHFFFAOYSA-N	3	0.186174	1.48592	1.494	12.4615	Saar	other
6PPD-quinone	2754428-18-5	pos	2016	E2	365	[M+H]+	InChI=1S/C18H22N2O2/c1-12(2)9-13(3)19-15-10-18(22)16(11-17(15)21)20-14-7-5-4-6-8-14/h4-8,10-13,19-20H,9H2,1-3H3	UBMGKRIXKUIXFQ-UHFFFAOYSA-N	3	0.109764	0.464844	0.474219	23.1462	Elbe	other
6PPD-quinone	2754428-18-5	pos	2016	Mu	365	[M+H]+	InChI=1S/C18H22N2O2/c1-12(2)9-13(3)19-15-10-18(22)16(11-17(15)21)20-14-7-5-4-6-8-14/h4-8,10-13,19-20H,9H2,1-3H3	UBMGKRIXKUIXFQ-UHFFFAOYSA-N	3	0.0893616	0.203174	0.218296	40.936	Mulde	other
6PPD-quinone	2754428-18-5	pos	2016	R4	365	[M+H]+	InChI=1S/C18H22N2O2/c1-12(2)9-13(3)19-15-10-18(22)16(11-17(15)21)20-14-7-5-4-6-8-14/h4-8,10-13,19-20H,9H2,1-3H3	UBMGKRIXKUIXFQ-UHFFFAOYSA-N	3	0.0641403	0.509928	0.512686	12.5106	Rhine	other
6PPD-quinone	2754428-18-5	pos	2016	R3	365	[M+H]+	InChI=1S/C18H22N2O2/c1-12(2)9-13(3)19-15-10-18(22)16(11-17(15)21)20-14-7-5-4-6-8-14/h4-8,10-13,19-20H,9H2,1-3H3	UBMGKRIXKUIXFQ-UHFFFAOYSA-N	3	0.0499571	0.48856	0.490249	10.1902	Rhine	other
6PPD-quinone	2754428-18-5	pos	2016	R1	365	[M+H]+	InChI=1S/C18H22N2O2/c1-12(2)9-13(3)19-15-10-18(22)16(11-17(15)21)20-14-7-5-4-6-8-14/h4-8,10-13,19-20H,9H2,1-3H3	UBMGKRIXKUIXFQ-UHFFFAOYSA-N	3	0.0777973	1.01786	1.01984	7.62838	Rhine	other
6PPD-quinone	2754428-18-5	pos	2016	Sa	365	[M+H]+	InChI=1S/C18H22N2O2/c1-12(2)9-13(3)19-15-10-18(22)16(11-17(15)21)20-14-7-5-4-6-8-14/h4-8,10-13,19-20H,9H2,1-3H3	UBMGKRIXKUIXFQ-UHFFFAOYSA-N	3	0.12586	0.647524	0.656261	19.1783	Saale	other
6PPD-quinone	2754428-18-5	pos	2016	S1	365	[M+H]+	InChI=1S/C18H22N2O2/c1-12(2)9-13(3)19-15-10-18(22)16(11-17(15)21)20-14-7-5-4-6-8-14/h4-8,10-13,19-20H,9H2,1-3H3	UBMGKRIXKUIXFQ-UHFFFAOYSA-N	3	0.00468647	0.415894	0.415912	1.12679	Saar	other
6PPD-quinone	2754428-18-5	pos	2016	S2	365	[M+H]+	InChI=1S/C18H22N2O2/c1-12(2)9-13(3)19-15-10-18(22)16(11-17(15)21)20-14-7-5-4-6-8-14/h4-8,10-13,19-20H,9H2,1-3H3	UBMGKRIXKUIXFQ-UHFFFAOYSA-N	3	0.188829	2.12143	2.12694	8.87795	Saar	other
6PPD-quinone	2754428-18-5	pos	2017	E2	365	[M+H]+	InChI=1S/C18H22N2O2/c1-12(2)9-13(3)19-15-10-18(22)16(11-17(15)21)20-14-7-5-4-6-8-14/h4-8,10-13,19-20H,9H2,1-3H3	UBMGKRIXKUIXFQ-UHFFFAOYSA-N	3	0.25493	0.312054	0.396874	64.2345	Elbe	other
6PPD-quinone	2754428-18-5	pos	2017	Mu	365	[M+H]+	InChI=1S/C18H22N2O2/c1-12(2)9-13(3)19-15-10-18(22)16(11-17(15)21)20-14-7-5-4-6-8-14/h4-8,10-13,19-20H,9H2,1-3H3	UBMGKRIXKUIXFQ-UHFFFAOYSA-N	3	0.191918	0.339498	0.374688	51.2207	Mulde	other
6PPD-quinone	2754428-18-5	pos	2017	R4	365	[M+H]+	InChI=1S/C18H22N2O2/c1-12(2)9-13(3)19-15-10-18(22)16(11-17(15)21)20-14-7-5-4-6-8-14/h4-8,10-13,19-20H,9H2,1-3H3	UBMGKRIXKUIXFQ-UHFFFAOYSA-N	3	0.0448783	0.537736	0.538985	8.32645	Rhine	other
6PPD-quinone	2754428-18-5	pos	2017	R3	365	[M+H]+	InChI=1S/C18H22N2O2/c1-12(2)9-13(3)19-15-10-18(22)16(11-17(15)21)20-14-7-5-4-6-8-14/h4-8,10-13,19-20H,9H2,1-3H3	UBMGKRIXKUIXFQ-UHFFFAOYSA-N	3	0.0607119	0.40252	0.405481	14.9728	Rhine	other
6PPD-quinone	2754428-18-5	pos	2017	R1	365	[M+H]+	InChI=1S/C18H22N2O2/c1-12(2)9-13(3)19-15-10-18(22)16(11-17(15)21)20-14-7-5-4-6-8-14/h4-8,10-13,19-20H,9H2,1-3H3	UBMGKRIXKUIXFQ-UHFFFAOYSA-N	3	0.0363078	0.652852	0.653511	5.55581	Rhine	other
6PPD-quinone	2754428-18-5	pos	2017	Sa	365	[M+H]+	InChI=1S/C18H22N2O2/c1-12(2)9-13(3)19-15-10-18(22)16(11-17(15)21)20-14-7-5-4-6-8-14/h4-8,10-13,19-20H,9H2,1-3H3	UBMGKRIXKUIXFQ-UHFFFAOYSA-N	3	0.156741	0.570881	0.585743	26.7593	Saale	other
6PPD-quinone	2754428-18-5	pos	2017	S1	365	[M+H]+	InChI=1S/C18H22N2O2/c1-12(2)9-13(3)19-15-10-18(22)16(11-17(15)21)20-14-7-5-4-6-8-14/h4-8,10-13,19-20H,9H2,1-3H3	UBMGKRIXKUIXFQ-UHFFFAOYSA-N	3	0.0193568	0.504568	0.504815	3.83443	Saar	other
6PPD-quinone	2754428-18-5	pos	2017	S2	365	[M+H]+	InChI=1S/C18H22N2O2/c1-12(2)9-13(3)19-15-10-18(22)16(11-17(15)21)20-14-7-5-4-6-8-14/h4-8,10-13,19-20H,9H2,1-3H3	UBMGKRIXKUIXFQ-UHFFFAOYSA-N	3	0.29807	2.02162	2.03633	14.6376	Saar	other
6PPD-quinone	2754428-18-5	pos	2018	E2	365	[M+H]+	InChI=1S/C18H22N2O2/c1-12(2)9-13(3)19-15-10-18(22)16(11-17(15)21)20-14-7-5-4-6-8-14/h4-8,10-13,19-20H,9H2,1-3H3	UBMGKRIXKUIXFQ-UHFFFAOYSA-N	3	0.0505055	0.496232	0.497886	10.144	Elbe	other
6PPD-quinone	2754428-18-5	pos	2018	Mu	365	[M+H]+	InChI=1S/C18H22N2O2/c1-12(2)9-13(3)19-15-10-18(22)16(11-17(15)21)20-14-7-5-4-6-8-14/h4-8,10-13,19-20H,9H2,1-3H3	UBMGKRIXKUIXFQ-UHFFFAOYSA-N	3	0.217146	0.289496	0.354079	61.3269	Mulde	other
6PPD-quinone	2754428-18-5	pos	2018	R4	365	[M+H]+	InChI=1S/C18H22N2O2/c1-12(2)9-13(3)19-15-10-18(22)16(11-17(15)21)20-14-7-5-4-6-8-14/h4-8,10-13,19-20H,9H2,1-3H3	UBMGKRIXKUIXFQ-UHFFFAOYSA-N	3	0.00479317	0.68737	0.687381	0.697309	Rhine	other
6PPD-quinone	2754428-18-5	pos	2018	R3	365	[M+H]+	InChI=1S/C18H22N2O2/c1-12(2)9-13(3)19-15-10-18(22)16(11-17(15)21)20-14-7-5-4-6-8-14/h4-8,10-13,19-20H,9H2,1-3H3	UBMGKRIXKUIXFQ-UHFFFAOYSA-N	3	0.0574405	0.42907	0.431725	13.3049	Rhine	other
6PPD-quinone	2754428-18-5	pos	2018	R1	365	[M+H]+	InChI=1S/C18H22N2O2/c1-12(2)9-13(3)19-15-10-18(22)16(11-17(15)21)20-14-7-5-4-6-8-14/h4-8,10-13,19-20H,9H2,1-3H3	UBMGKRIXKUIXFQ-UHFFFAOYSA-N	3	0.0533331	0.545843	0.547627	9.73895	Rhine	other
6PPD-quinone	2754428-18-5	pos	2018	Sa	365	[M+H]+	InChI=1S/C18H22N2O2/c1-12(2)9-13(3)19-15-10-18(22)16(11-17(15)21)20-14-7-5-4-6-8-14/h4-8,10-13,19-20H,9H2,1-3H3	UBMGKRIXKUIXFQ-UHFFFAOYSA-N	3	0.211498	0.571531	0.600541	35.2179	Saale	other
6PPD-quinone	2754428-18-5	pos	2018	S1	365	[M+H]+	InChI=1S/C18H22N2O2/c1-12(2)9-13(3)19-15-10-18(22)16(11-17(15)21)20-14-7-5-4-6-8-14/h4-8,10-13,19-20H,9H2,1-3H3	UBMGKRIXKUIXFQ-UHFFFAOYSA-N	3	0.0450547	0.601803	0.602931	7.47262	Saar	other
6PPD-quinone	2754428-18-5	pos	2018	S2	365	[M+H]+	InChI=1S/C18H22N2O2/c1-12(2)9-13(3)19-15-10-18(22)16(11-17(15)21)20-14-7-5-4-6-8-14/h4-8,10-13,19-20H,9H2,1-3H3	UBMGKRIXKUIXFQ-UHFFFAOYSA-N	3	0.0754328	1.51994	1.52118	4.95882	Saar	other
6PPD-quinone	2754428-18-5	pos	2019	E2	365	[M+H]+	InChI=1S/C18H22N2O2/c1-12(2)9-13(3)19-15-10-18(22)16(11-17(15)21)20-14-7-5-4-6-8-14/h4-8,10-13,19-20H,9H2,1-3H3	UBMGKRIXKUIXFQ-UHFFFAOYSA-N	3	0.147471	0.333526	0.352381	41.8498	Elbe	other
6PPD-quinone	2754428-18-5	pos	2019	Mu	365	[M+H]+	InChI=1S/C18H22N2O2/c1-12(2)9-13(3)19-15-10-18(22)16(11-17(15)21)20-14-7-5-4-6-8-14/h4-8,10-13,19-20H,9H2,1-3H3	UBMGKRIXKUIXFQ-UHFFFAOYSA-N	3	0.0487574	0.241988	0.245452	19.8643	Mulde	other
6PPD-quinone	2754428-18-5	pos	2019	R4	365	[M+H]+	InChI=1S/C18H22N2O2/c1-12(2)9-13(3)19-15-10-18(22)16(11-17(15)21)20-14-7-5-4-6-8-14/h4-8,10-13,19-20H,9H2,1-3H3	UBMGKRIXKUIXFQ-UHFFFAOYSA-N	3	0.0786547	0.388101	0.393722	19.9772	Rhine	other
6PPD-quinone	2754428-18-5	pos	2019	R3	365	[M+H]+	InChI=1S/C18H22N2O2/c1-12(2)9-13(3)19-15-10-18(22)16(11-17(15)21)20-14-7-5-4-6-8-14/h4-8,10-13,19-20H,9H2,1-3H3	UBMGKRIXKUIXFQ-UHFFFAOYSA-N	3	0.0157342	0.200853	0.201258	7.81791	Rhine	other
6PPD-quinone	2754428-18-5	pos	2019	R1	365	[M+H]+	InChI=1S/C18H22N2O2/c1-12(2)9-13(3)19-15-10-18(22)16(11-17(15)21)20-14-7-5-4-6-8-14/h4-8,10-13,19-20H,9H2,1-3H3	UBMGKRIXKUIXFQ-UHFFFAOYSA-N	2	0.0171096	0.322007	0.322234	5.30968	Rhine	other
6PPD-quinone	2754428-18-5	pos	2019	Sa	365	[M+H]+	InChI=1S/C18H22N2O2/c1-12(2)9-13(3)19-15-10-18(22)16(11-17(15)21)20-14-7-5-4-6-8-14/h4-8,10-13,19-20H,9H2,1-3H3	UBMGKRIXKUIXFQ-UHFFFAOYSA-N	2	0.151329	0.30467	0.322915	46.8635	Saale	other
6PPD-quinone	2754428-18-5	pos	2019	S1	365	[M+H]+	InChI=1S/C18H22N2O2/c1-12(2)9-13(3)19-15-10-18(22)16(11-17(15)21)20-14-7-5-4-6-8-14/h4-8,10-13,19-20H,9H2,1-3H3	UBMGKRIXKUIXFQ-UHFFFAOYSA-N	3	0.037952	1.14289	1.14331	3.3195	Saar	other
6PPD-quinone	2754428-18-5	pos	2019	S2	365	[M+H]+	InChI=1S/C18H22N2O2/c1-12(2)9-13(3)19-15-10-18(22)16(11-17(15)21)20-14-7-5-4-6-8-14/h4-8,10-13,19-20H,9H2,1-3H3	UBMGKRIXKUIXFQ-UHFFFAOYSA-N	3	0.0448359	2.11148	2.1118	2.12312	Saar	other
6PPD-quinone	2754428-18-5	pos	2020	E2	365	[M+H]+	InChI=1S/C18H22N2O2/c1-12(2)9-13(3)19-15-10-18(22)16(11-17(15)21)20-14-7-5-4-6-8-14/h4-8,10-13,19-20H,9H2,1-3H3	UBMGKRIXKUIXFQ-UHFFFAOYSA-N	3	0.109237	0.279126	0.295284	36.9939	Elbe	other
6PPD-quinone	2754428-18-5	pos	2020	Mu	365	[M+H]+	InChI=1S/C18H22N2O2/c1-12(2)9-13(3)19-15-10-18(22)16(11-17(15)21)20-14-7-5-4-6-8-14/h4-8,10-13,19-20H,9H2,1-3H3	UBMGKRIXKUIXFQ-UHFFFAOYSA-N	2	0.036962	0.209979	0.2116	17.4679	Mulde	other
6PPD-quinone	2754428-18-5	pos	2020	R4	365	[M+H]+	InChI=1S/C18H22N2O2/c1-12(2)9-13(3)19-15-10-18(22)16(11-17(15)21)20-14-7-5-4-6-8-14/h4-8,10-13,19-20H,9H2,1-3H3	UBMGKRIXKUIXFQ-UHFFFAOYSA-N	2	0.0640367	0.296644	0.30008	21.3399	Rhine	other
6PPD-quinone	2754428-18-5	pos	2020	R3	365	[M+H]+	InChI=1S/C18H22N2O2/c1-12(2)9-13(3)19-15-10-18(22)16(11-17(15)21)20-14-7-5-4-6-8-14/h4-8,10-13,19-20H,9H2,1-3H3	UBMGKRIXKUIXFQ-UHFFFAOYSA-N	2	0.00740551	0.310328	0.310372	2.38601	Rhine	other
6PPD-quinone	2754428-18-5	pos	2020	R1	365	[M+H]+	InChI=1S/C18H22N2O2/c1-12(2)9-13(3)19-15-10-18(22)16(11-17(15)21)20-14-7-5-4-6-8-14/h4-8,10-13,19-20H,9H2,1-3H3	UBMGKRIXKUIXFQ-UHFFFAOYSA-N	2	0.00703016	0.420304	0.420334	1.67252	Rhine	other
6PPD-quinone	2754428-18-5	pos	2020	Sa	365	[M+H]+	InChI=1S/C18H22N2O2/c1-12(2)9-13(3)19-15-10-18(22)16(11-17(15)21)20-14-7-5-4-6-8-14/h4-8,10-13,19-20H,9H2,1-3H3	UBMGKRIXKUIXFQ-UHFFFAOYSA-N	3	0.132619	0.48269	0.495755	26.751	Saale	other
6PPD-quinone	2754428-18-5	pos	2020	S1	365	[M+H]+	InChI=1S/C18H22N2O2/c1-12(2)9-13(3)19-15-10-18(22)16(11-17(15)21)20-14-7-5-4-6-8-14/h4-8,10-13,19-20H,9H2,1-3H3	UBMGKRIXKUIXFQ-UHFFFAOYSA-N	3	0.0776421	0.577776	0.581301	13.3566	Saar	other
6PPD-quinone	2754428-18-5	pos	2020	S2	365	[M+H]+	InChI=1S/C18H22N2O2/c1-12(2)9-13(3)19-15-10-18(22)16(11-17(15)21)20-14-7-5-4-6-8-14/h4-8,10-13,19-20H,9H2,1-3H3	UBMGKRIXKUIXFQ-UHFFFAOYSA-N	3	0.0169529	1.51484	1.51491	1.11907	Saar	other
6PPD-quinone	2754428-18-5	pos	2021	E2	365	[M+H]+	InChI=1S/C18H22N2O2/c1-12(2)9-13(3)19-15-10-18(22)16(11-17(15)21)20-14-7-5-4-6-8-14/h4-8,10-13,19-20H,9H2,1-3H3	UBMGKRIXKUIXFQ-UHFFFAOYSA-N	3	0.0673006	0.24419	0.249777	26.9442	Elbe	other
6PPD-quinone	2754428-18-5	pos	2021	Mu	365	[M+H]+	InChI=1S/C18H22N2O2/c1-12(2)9-13(3)19-15-10-18(22)16(11-17(15)21)20-14-7-5-4-6-8-14/h4-8,10-13,19-20H,9H2,1-3H3	UBMGKRIXKUIXFQ-UHFFFAOYSA-N	3	0.0385488	0.179401	0.182052	21.1746	Mulde	other
6PPD-quinone	2754428-18-5	pos	2021	R4	365	[M+H]+	InChI=1S/C18H22N2O2/c1-12(2)9-13(3)19-15-10-18(22)16(11-17(15)21)20-14-7-5-4-6-8-14/h4-8,10-13,19-20H,9H2,1-3H3	UBMGKRIXKUIXFQ-UHFFFAOYSA-N	3	0.0416227	0.265018	0.267319	15.5704	Rhine	other
6PPD-quinone	2754428-18-5	pos	2021	R3	365	[M+H]+	InChI=1S/C18H22N2O2/c1-12(2)9-13(3)19-15-10-18(22)16(11-17(15)21)20-14-7-5-4-6-8-14/h4-8,10-13,19-20H,9H2,1-3H3	UBMGKRIXKUIXFQ-UHFFFAOYSA-N	3	0.0772126	0.232878	0.240799	32.0651	Rhine	other
6PPD-quinone	2754428-18-5	pos	2021	R1	365	[M+H]+	InChI=1S/C18H22N2O2/c1-12(2)9-13(3)19-15-10-18(22)16(11-17(15)21)20-14-7-5-4-6-8-14/h4-8,10-13,19-20H,9H2,1-3H3	UBMGKRIXKUIXFQ-UHFFFAOYSA-N	3	0.0309976	0.270062	0.271196	11.43	Rhine	other
6PPD-quinone	2754428-18-5	pos	2021	Sa	365	[M+H]+	InChI=1S/C18H22N2O2/c1-12(2)9-13(3)19-15-10-18(22)16(11-17(15)21)20-14-7-5-4-6-8-14/h4-8,10-13,19-20H,9H2,1-3H3	UBMGKRIXKUIXFQ-UHFFFAOYSA-N	3	0.0459879	0.395327	0.397098	11.581	Saale	other
6PPD-quinone	2754428-18-5	pos	2021	S1	365	[M+H]+	InChI=1S/C18H22N2O2/c1-12(2)9-13(3)19-15-10-18(22)16(11-17(15)21)20-14-7-5-4-6-8-14/h4-8,10-13,19-20H,9H2,1-3H3	UBMGKRIXKUIXFQ-UHFFFAOYSA-N	3	0.226958	0.708634	0.729958	31.092	Saar	other
6PPD-quinone	2754428-18-5	pos	2021	S2	365	[M+H]+	InChI=1S/C18H22N2O2/c1-12(2)9-13(3)19-15-10-18(22)16(11-17(15)21)20-14-7-5-4-6-8-14/h4-8,10-13,19-20H,9H2,1-3H3	UBMGKRIXKUIXFQ-UHFFFAOYSA-N	3	0.269135	1.00297	1.02935	26.146	Saar	other
6PPD-quinone	2754428-18-5	pos	2022	E2	365	[M+H]+	InChI=1S/C18H22N2O2/c1-12(2)9-13(3)19-15-10-18(22)16(11-17(15)21)20-14-7-5-4-6-8-14/h4-8,10-13,19-20H,9H2,1-3H3	UBMGKRIXKUIXFQ-UHFFFAOYSA-N	3	0.0216823	0.19787	0.198689	10.9127	Elbe	other
6PPD-quinone	2754428-18-5	pos	2022	R4	365	[M+H]+	InChI=1S/C18H22N2O2/c1-12(2)9-13(3)19-15-10-18(22)16(11-17(15)21)20-14-7-5-4-6-8-14/h4-8,10-13,19-20H,9H2,1-3H3	UBMGKRIXKUIXFQ-UHFFFAOYSA-N	3	0.0163017	0.212143	0.212567	7.66899	Rhine	other
6PPD-quinone	2754428-18-5	pos	2022	R3	365	[M+H]+	InChI=1S/C18H22N2O2/c1-12(2)9-13(3)19-15-10-18(22)16(11-17(15)21)20-14-7-5-4-6-8-14/h4-8,10-13,19-20H,9H2,1-3H3	UBMGKRIXKUIXFQ-UHFFFAOYSA-N	3	0.0395324	0.219895	0.222136	17.7964	Rhine	other
6PPD-quinone	2754428-18-5	pos	2022	R1	365	[M+H]+	InChI=1S/C18H22N2O2/c1-12(2)9-13(3)19-15-10-18(22)16(11-17(15)21)20-14-7-5-4-6-8-14/h4-8,10-13,19-20H,9H2,1-3H3	UBMGKRIXKUIXFQ-UHFFFAOYSA-N	3	0.0359613	0.355205	0.356412	10.0898	Rhine	other
6PPD-quinone	2754428-18-5	pos	2022	Sa	365	[M+H]+	InChI=1S/C18H22N2O2/c1-12(2)9-13(3)19-15-10-18(22)16(11-17(15)21)20-14-7-5-4-6-8-14/h4-8,10-13,19-20H,9H2,1-3H3	UBMGKRIXKUIXFQ-UHFFFAOYSA-N	3	0.0290423	0.281865	0.282895	10.2661	Saale	other
6PPD-quinone	2754428-18-5	pos	2022	S1	365	[M+H]+	InChI=1S/C18H22N2O2/c1-12(2)9-13(3)19-15-10-18(22)16(11-17(15)21)20-14-7-5-4-6-8-14/h4-8,10-13,19-20H,9H2,1-3H3	UBMGKRIXKUIXFQ-UHFFFAOYSA-N	3	0.131518	0.430431	0.44324	29.6721	Saar	other
6PPD-quinone	2754428-18-5	pos	2022	S2	365	[M+H]+	InChI=1S/C18H22N2O2/c1-12(2)9-13(3)19-15-10-18(22)16(11-17(15)21)20-14-7-5-4-6-8-14/h4-8,10-13,19-20H,9H2,1-3H3	UBMGKRIXKUIXFQ-UHFFFAOYSA-N	3	0.0409811	0.839648	0.840315	4.87687	Saar	other
Aliskiren	173334-57-1	neg	2005	R4	365	[M+HCOO-]-	InChI=1S/C30H53N3O6/c1-19(2)22(14-21-10-11-26(38-8)27(15-21)39-13-9-12-37-7)16-24(31)25(34)17-23(20(3)4)28(35)33-18-30(5,6)29(32)36/h10-11,15,19-20,22-25,34H,9,12-14,16-18,31H2,1-8H3,(H2,32,36)(H,33,35)/t22-,23-,24-,25-/m0/s1	UXOWGYHJODZGMF-QORCZRPOSA-N	2	0.000962723	0.00617841	0.0062158	15.4883	Rhine	HMP/VMP
Aliskiren	173334-57-1	neg	2006	R4	365	[M+HCOO-]-	InChI=1S/C30H53N3O6/c1-19(2)22(14-21-10-11-26(38-8)27(15-21)39-13-9-12-37-7)16-24(31)25(34)17-23(20(3)4)28(35)33-18-30(5,6)29(32)36/h10-11,15,19-20,22-25,34H,9,12-14,16-18,31H2,1-8H3,(H2,32,36)(H,33,35)/t22-,23-,24-,25-/m0/s1	UXOWGYHJODZGMF-QORCZRPOSA-N	3	0.00384556	0.0302189	0.0303899	12.6541	Rhine	HMP/VMP
Aliskiren	173334-57-1	neg	2006	R3	365	[M+HCOO-]-	InChI=1S/C30H53N3O6/c1-19(2)22(14-21-10-11-26(38-8)27(15-21)39-13-9-12-37-7)16-24(31)25(34)17-23(20(3)4)28(35)33-18-30(5,6)29(32)36/h10-11,15,19-20,22-25,34H,9,12-14,16-18,31H2,1-8H3,(H2,32,36)(H,33,35)/t22-,23-,24-,25-/m0/s1	UXOWGYHJODZGMF-QORCZRPOSA-N	3	0.00569071	0.0371155	0.0373894	15.2201	Rhine	HMP/VMP
Aliskiren	173334-57-1	neg	2006	R1	365	[M+HCOO-]-	InChI=1S/C30H53N3O6/c1-19(2)22(14-21-10-11-26(38-8)27(15-21)39-13-9-12-37-7)16-24(31)25(34)17-23(20(3)4)28(35)33-18-30(5,6)29(32)36/h10-11,15,19-20,22-25,34H,9,12-14,16-18,31H2,1-8H3,(H2,32,36)(H,33,35)/t22-,23-,24-,25-/m0/s1	UXOWGYHJODZGMF-QORCZRPOSA-N	2	0.00287519	0.0220492	0.0221428	12.9848	Rhine	HMP/VMP
Aliskiren	173334-57-1	neg	2007	R4	365	[M+HCOO-]-	InChI=1S/C30H53N3O6/c1-19(2)22(14-21-10-11-26(38-8)27(15-21)39-13-9-12-37-7)16-24(31)25(34)17-23(20(3)4)28(35)33-18-30(5,6)29(32)36/h10-11,15,19-20,22-25,34H,9,12-14,16-18,31H2,1-8H3,(H2,32,36)(H,33,35)/t22-,23-,24-,25-/m0/s1	UXOWGYHJODZGMF-QORCZRPOSA-N	3	0.00733207	0.118339	0.118487	6.18807	Rhine	HMP/VMP
Aliskiren	173334-57-1	neg	2007	R3	365	[M+HCOO-]-	InChI=1S/C30H53N3O6/c1-19(2)22(14-21-10-11-26(38-8)27(15-21)39-13-9-12-37-7)16-24(31)25(34)17-23(20(3)4)28(35)33-18-30(5,6)29(32)36/h10-11,15,19-20,22-25,34H,9,12-14,16-18,31H2,1-8H3,(H2,32,36)(H,33,35)/t22-,23-,24-,25-/m0/s1	UXOWGYHJODZGMF-QORCZRPOSA-N	3	0.0119093	0.114712	0.115112	10.3458	Rhine	HMP/VMP
Aliskiren	173334-57-1	neg	2007	R1	365	[M+HCOO-]-	InChI=1S/C30H53N3O6/c1-19(2)22(14-21-10-11-26(38-8)27(15-21)39-13-9-12-37-7)16-24(31)25(34)17-23(20(3)4)28(35)33-18-30(5,6)29(32)36/h10-11,15,19-20,22-25,34H,9,12-14,16-18,31H2,1-8H3,(H2,32,36)(H,33,35)/t22-,23-,24-,25-/m0/s1	UXOWGYHJODZGMF-QORCZRPOSA-N	3	0.00911744	0.0957191	0.096015	9.49585	Rhine	HMP/VMP
Aliskiren	173334-57-1	neg	2008	E5	365	[M+HCOO-]-	InChI=1S/C30H53N3O6/c1-19(2)22(14-21-10-11-26(38-8)27(15-21)39-13-9-12-37-7)16-24(31)25(34)17-23(20(3)4)28(35)33-18-30(5,6)29(32)36/h10-11,15,19-20,22-25,34H,9,12-14,16-18,31H2,1-8H3,(H2,32,36)(H,33,35)/t22-,23-,24-,25-/m0/s1	UXOWGYHJODZGMF-QORCZRPOSA-N	3	0.0036717	0.114664	0.114703	3.20105	Elbe	HMP/VMP
Aliskiren	173334-57-1	neg	2008	E4	365	[M+HCOO-]-	InChI=1S/C30H53N3O6/c1-19(2)22(14-21-10-11-26(38-8)27(15-21)39-13-9-12-37-7)16-24(31)25(34)17-23(20(3)4)28(35)33-18-30(5,6)29(32)36/h10-11,15,19-20,22-25,34H,9,12-14,16-18,31H2,1-8H3,(H2,32,36)(H,33,35)/t22-,23-,24-,25-/m0/s1	UXOWGYHJODZGMF-QORCZRPOSA-N	3	0.0306657	0.0319821	0.038726	79.1863	Elbe	HMP/VMP
Aliskiren	173334-57-1	neg	2008	E2	365	[M+HCOO-]-	InChI=1S/C30H53N3O6/c1-19(2)22(14-21-10-11-26(38-8)27(15-21)39-13-9-12-37-7)16-24(31)25(34)17-23(20(3)4)28(35)33-18-30(5,6)29(32)36/h10-11,15,19-20,22-25,34H,9,12-14,16-18,31H2,1-8H3,(H2,32,36)(H,33,35)/t22-,23-,24-,25-/m0/s1	UXOWGYHJODZGMF-QORCZRPOSA-N	2	0.00366357	0.0182348	0.0184179	19.8914	Elbe	HMP/VMP
Aliskiren	173334-57-1	neg	2008	Mu	365	[M+HCOO-]-	InChI=1S/C30H53N3O6/c1-19(2)22(14-21-10-11-26(38-8)27(15-21)39-13-9-12-37-7)16-24(31)25(34)17-23(20(3)4)28(35)33-18-30(5,6)29(32)36/h10-11,15,19-20,22-25,34H,9,12-14,16-18,31H2,1-8H3,(H2,32,36)(H,33,35)/t22-,23-,24-,25-/m0/s1	UXOWGYHJODZGMF-QORCZRPOSA-N	3	0.0150023	0.0595339	0.0607668	24.6883	Mulde	HMP/VMP
Aliskiren	173334-57-1	neg	2008	R4	365	[M+HCOO-]-	InChI=1S/C30H53N3O6/c1-19(2)22(14-21-10-11-26(38-8)27(15-21)39-13-9-12-37-7)16-24(31)25(34)17-23(20(3)4)28(35)33-18-30(5,6)29(32)36/h10-11,15,19-20,22-25,34H,9,12-14,16-18,31H2,1-8H3,(H2,32,36)(H,33,35)/t22-,23-,24-,25-/m0/s1	UXOWGYHJODZGMF-QORCZRPOSA-N	3	0.0123529	0.136872	0.137241	9.00083	Rhine	HMP/VMP
Aliskiren	173334-57-1	neg	2008	R3	365	[M+HCOO-]-	InChI=1S/C30H53N3O6/c1-19(2)22(14-21-10-11-26(38-8)27(15-21)39-13-9-12-37-7)16-24(31)25(34)17-23(20(3)4)28(35)33-18-30(5,6)29(32)36/h10-11,15,19-20,22-25,34H,9,12-14,16-18,31H2,1-8H3,(H2,32,36)(H,33,35)/t22-,23-,24-,25-/m0/s1	UXOWGYHJODZGMF-QORCZRPOSA-N	3	0.0177483	0.161034	0.161665	10.9784	Rhine	HMP/VMP
Aliskiren	173334-57-1	neg	2008	R1	365	[M+HCOO-]-	InChI=1S/C30H53N3O6/c1-19(2)22(14-21-10-11-26(38-8)27(15-21)39-13-9-12-37-7)16-24(31)25(34)17-23(20(3)4)28(35)33-18-30(5,6)29(32)36/h10-11,15,19-20,22-25,34H,9,12-14,16-18,31H2,1-8H3,(H2,32,36)(H,33,35)/t22-,23-,24-,25-/m0/s1	UXOWGYHJODZGMF-QORCZRPOSA-N	3	0.00559494	0.08284	0.0829633	6.74388	Rhine	HMP/VMP
Aliskiren	173334-57-1	neg	2008	Sa	365	[M+HCOO-]-	InChI=1S/C30H53N3O6/c1-19(2)22(14-21-10-11-26(38-8)27(15-21)39-13-9-12-37-7)16-24(31)25(34)17-23(20(3)4)28(35)33-18-30(5,6)29(32)36/h10-11,15,19-20,22-25,34H,9,12-14,16-18,31H2,1-8H3,(H2,32,36)(H,33,35)/t22-,23-,24-,25-/m0/s1	UXOWGYHJODZGMF-QORCZRPOSA-N	3	0.0200031	0.11977	0.120835	16.5541	Saale	HMP/VMP
Aliskiren	173334-57-1	neg	2008	S1	365	[M+HCOO-]-	InChI=1S/C30H53N3O6/c1-19(2)22(14-21-10-11-26(38-8)27(15-21)39-13-9-12-37-7)16-24(31)25(34)17-23(20(3)4)28(35)33-18-30(5,6)29(32)36/h10-11,15,19-20,22-25,34H,9,12-14,16-18,31H2,1-8H3,(H2,32,36)(H,33,35)/t22-,23-,24-,25-/m0/s1	UXOWGYHJODZGMF-QORCZRPOSA-N	2	0.0121285	0.0287039	0.0299577	40.4853	Saar	HMP/VMP
Aliskiren	173334-57-1	neg	2008	S2	365	[M+HCOO-]-	InChI=1S/C30H53N3O6/c1-19(2)22(14-21-10-11-26(38-8)27(15-21)39-13-9-12-37-7)16-24(31)25(34)17-23(20(3)4)28(35)33-18-30(5,6)29(32)36/h10-11,15,19-20,22-25,34H,9,12-14,16-18,31H2,1-8H3,(H2,32,36)(H,33,35)/t22-,23-,24-,25-/m0/s1	UXOWGYHJODZGMF-QORCZRPOSA-N	3	0.0120719	0.0636557	0.0644702	18.7248	Saar	HMP/VMP
Aliskiren	173334-57-1	neg	2009	D3	365	[M+HCOO-]-	InChI=1S/C30H53N3O6/c1-19(2)22(14-21-10-11-26(38-8)27(15-21)39-13-9-12-37-7)16-24(31)25(34)17-23(20(3)4)28(35)33-18-30(5,6)29(32)36/h10-11,15,19-20,22-25,34H,9,12-14,16-18,31H2,1-8H3,(H2,32,36)(H,33,35)/t22-,23-,24-,25-/m0/s1	UXOWGYHJODZGMF-QORCZRPOSA-N	3	0.00771658	0.0253686	0.0260829	29.5848	Danube	HMP/VMP
Aliskiren	173334-57-1	neg	2009	D1	365	[M+HCOO-]-	InChI=1S/C30H53N3O6/c1-19(2)22(14-21-10-11-26(38-8)27(15-21)39-13-9-12-37-7)16-24(31)25(34)17-23(20(3)4)28(35)33-18-30(5,6)29(32)36/h10-11,15,19-20,22-25,34H,9,12-14,16-18,31H2,1-8H3,(H2,32,36)(H,33,35)/t22-,23-,24-,25-/m0/s1	UXOWGYHJODZGMF-QORCZRPOSA-N	2	0.00180505	0.0622802	0.0622933	2.89767	Danube	HMP/VMP
Aliskiren	173334-57-1	neg	2009	E5	365	[M+HCOO-]-	InChI=1S/C30H53N3O6/c1-19(2)22(14-21-10-11-26(38-8)27(15-21)39-13-9-12-37-7)16-24(31)25(34)17-23(20(3)4)28(35)33-18-30(5,6)29(32)36/h10-11,15,19-20,22-25,34H,9,12-14,16-18,31H2,1-8H3,(H2,32,36)(H,33,35)/t22-,23-,24-,25-/m0/s1	UXOWGYHJODZGMF-QORCZRPOSA-N	3	0.0108539	0.315479	0.315603	3.43912	Elbe	HMP/VMP
Aliskiren	173334-57-1	neg	2009	E4	365	[M+HCOO-]-	InChI=1S/C30H53N3O6/c1-19(2)22(14-21-10-11-26(38-8)27(15-21)39-13-9-12-37-7)16-24(31)25(34)17-23(20(3)4)28(35)33-18-30(5,6)29(32)36/h10-11,15,19-20,22-25,34H,9,12-14,16-18,31H2,1-8H3,(H2,32,36)(H,33,35)/t22-,23-,24-,25-/m0/s1	UXOWGYHJODZGMF-QORCZRPOSA-N	3	0.0911279	0.137923	0.153351	59.4246	Elbe	HMP/VMP
Aliskiren	173334-57-1	neg	2009	E2	365	[M+HCOO-]-	InChI=1S/C30H53N3O6/c1-19(2)22(14-21-10-11-26(38-8)27(15-21)39-13-9-12-37-7)16-24(31)25(34)17-23(20(3)4)28(35)33-18-30(5,6)29(32)36/h10-11,15,19-20,22-25,34H,9,12-14,16-18,31H2,1-8H3,(H2,32,36)(H,33,35)/t22-,23-,24-,25-/m0/s1	UXOWGYHJODZGMF-QORCZRPOSA-N	3	0.0118202	0.0436243	0.0446095	26.497	Elbe	HMP/VMP
Aliskiren	173334-57-1	neg	2009	Mu	365	[M+HCOO-]-	InChI=1S/C30H53N3O6/c1-19(2)22(14-21-10-11-26(38-8)27(15-21)39-13-9-12-37-7)16-24(31)25(34)17-23(20(3)4)28(35)33-18-30(5,6)29(32)36/h10-11,15,19-20,22-25,34H,9,12-14,16-18,31H2,1-8H3,(H2,32,36)(H,33,35)/t22-,23-,24-,25-/m0/s1	UXOWGYHJODZGMF-QORCZRPOSA-N	3	0.0657549	0.400233	0.404043	16.2742	Mulde	HMP/VMP
Aliskiren	173334-57-1	neg	2009	R4	365	[M+HCOO-]-	InChI=1S/C30H53N3O6/c1-19(2)22(14-21-10-11-26(38-8)27(15-21)39-13-9-12-37-7)16-24(31)25(34)17-23(20(3)4)28(35)33-18-30(5,6)29(32)36/h10-11,15,19-20,22-25,34H,9,12-14,16-18,31H2,1-8H3,(H2,32,36)(H,33,35)/t22-,23-,24-,25-/m0/s1	UXOWGYHJODZGMF-QORCZRPOSA-N	3	0.00617997	0.248942	0.248993	2.48199	Rhine	HMP/VMP
Aliskiren	173334-57-1	neg	2009	R3	365	[M+HCOO-]-	InChI=1S/C30H53N3O6/c1-19(2)22(14-21-10-11-26(38-8)27(15-21)39-13-9-12-37-7)16-24(31)25(34)17-23(20(3)4)28(35)33-18-30(5,6)29(32)36/h10-11,15,19-20,22-25,34H,9,12-14,16-18,31H2,1-8H3,(H2,32,36)(H,33,35)/t22-,23-,24-,25-/m0/s1	UXOWGYHJODZGMF-QORCZRPOSA-N	3	0.0384738	0.278976	0.280657	13.7085	Rhine	HMP/VMP
Aliskiren	173334-57-1	neg	2009	R1	365	[M+HCOO-]-	InChI=1S/C30H53N3O6/c1-19(2)22(14-21-10-11-26(38-8)27(15-21)39-13-9-12-37-7)16-24(31)25(34)17-23(20(3)4)28(35)33-18-30(5,6)29(32)36/h10-11,15,19-20,22-25,34H,9,12-14,16-18,31H2,1-8H3,(H2,32,36)(H,33,35)/t22-,23-,24-,25-/m0/s1	UXOWGYHJODZGMF-QORCZRPOSA-N	3	0.00333021	0.145371	0.145397	2.29043	Rhine	HMP/VMP
Aliskiren	173334-57-1	neg	2009	Sa	365	[M+HCOO-]-	InChI=1S/C30H53N3O6/c1-19(2)22(14-21-10-11-26(38-8)27(15-21)39-13-9-12-37-7)16-24(31)25(34)17-23(20(3)4)28(35)33-18-30(5,6)29(32)36/h10-11,15,19-20,22-25,34H,9,12-14,16-18,31H2,1-8H3,(H2,32,36)(H,33,35)/t22-,23-,24-,25-/m0/s1	UXOWGYHJODZGMF-QORCZRPOSA-N	3	0.151816	0.70195	0.713658	21.2729	Saale	HMP/VMP
Aliskiren	173334-57-1	neg	2009	S1	365	[M+HCOO-]-	InChI=1S/C30H53N3O6/c1-19(2)22(14-21-10-11-26(38-8)27(15-21)39-13-9-12-37-7)16-24(31)25(34)17-23(20(3)4)28(35)33-18-30(5,6)29(32)36/h10-11,15,19-20,22-25,34H,9,12-14,16-18,31H2,1-8H3,(H2,32,36)(H,33,35)/t22-,23-,24-,25-/m0/s1	UXOWGYHJODZGMF-QORCZRPOSA-N	3	0.0454008	0.242393	0.245423	18.499	Saar	HMP/VMP
Aliskiren	173334-57-1	neg	2009	S2	365	[M+HCOO-]-	InChI=1S/C30H53N3O6/c1-19(2)22(14-21-10-11-26(38-8)27(15-21)39-13-9-12-37-7)16-24(31)25(34)17-23(20(3)4)28(35)33-18-30(5,6)29(32)36/h10-11,15,19-20,22-25,34H,9,12-14,16-18,31H2,1-8H3,(H2,32,36)(H,33,35)/t22-,23-,24-,25-/m0/s1	UXOWGYHJODZGMF-QORCZRPOSA-N	2	0.0147732	0.204297	0.204564	7.22181	Saar	HMP/VMP
Aliskiren	173334-57-1	neg	2010	D3	365	[M+HCOO-]-	InChI=1S/C30H53N3O6/c1-19(2)22(14-21-10-11-26(38-8)27(15-21)39-13-9-12-37-7)16-24(31)25(34)17-23(20(3)4)28(35)33-18-30(5,6)29(32)36/h10-11,15,19-20,22-25,34H,9,12-14,16-18,31H2,1-8H3,(H2,32,36)(H,33,35)/t22-,23-,24-,25-/m0/s1	UXOWGYHJODZGMF-QORCZRPOSA-N	3	0.0267035	0.0628504	0.0661358	40.3768	Danube	HMP/VMP
Aliskiren	173334-57-1	neg	2010	D1	365	[M+HCOO-]-	InChI=1S/C30H53N3O6/c1-19(2)22(14-21-10-11-26(38-8)27(15-21)39-13-9-12-37-7)16-24(31)25(34)17-23(20(3)4)28(35)33-18-30(5,6)29(32)36/h10-11,15,19-20,22-25,34H,9,12-14,16-18,31H2,1-8H3,(H2,32,36)(H,33,35)/t22-,23-,24-,25-/m0/s1	UXOWGYHJODZGMF-QORCZRPOSA-N	3	0.00852731	0.0848736	0.0851689	10.0122	Danube	HMP/VMP
Aliskiren	173334-57-1	neg	2010	E5	365	[M+HCOO-]-	InChI=1S/C30H53N3O6/c1-19(2)22(14-21-10-11-26(38-8)27(15-21)39-13-9-12-37-7)16-24(31)25(34)17-23(20(3)4)28(35)33-18-30(5,6)29(32)36/h10-11,15,19-20,22-25,34H,9,12-14,16-18,31H2,1-8H3,(H2,32,36)(H,33,35)/t22-,23-,24-,25-/m0/s1	UXOWGYHJODZGMF-QORCZRPOSA-N	3	0.0202543	0.326584	0.32701	6.19381	Elbe	HMP/VMP
Aliskiren	173334-57-1	neg	2010	E4	365	[M+HCOO-]-	InChI=1S/C30H53N3O6/c1-19(2)22(14-21-10-11-26(38-8)27(15-21)39-13-9-12-37-7)16-24(31)25(34)17-23(20(3)4)28(35)33-18-30(5,6)29(32)36/h10-11,15,19-20,22-25,34H,9,12-14,16-18,31H2,1-8H3,(H2,32,36)(H,33,35)/t22-,23-,24-,25-/m0/s1	UXOWGYHJODZGMF-QORCZRPOSA-N	3	0.0499452	0.187667	0.191839	26.0349	Elbe	HMP/VMP
Aliskiren	173334-57-1	neg	2010	E2	365	[M+HCOO-]-	InChI=1S/C30H53N3O6/c1-19(2)22(14-21-10-11-26(38-8)27(15-21)39-13-9-12-37-7)16-24(31)25(34)17-23(20(3)4)28(35)33-18-30(5,6)29(32)36/h10-11,15,19-20,22-25,34H,9,12-14,16-18,31H2,1-8H3,(H2,32,36)(H,33,35)/t22-,23-,24-,25-/m0/s1	UXOWGYHJODZGMF-QORCZRPOSA-N	3	0.00536378	0.0691353	0.0692764	7.74258	Elbe	HMP/VMP
Aliskiren	173334-57-1	neg	2010	Mu	365	[M+HCOO-]-	InChI=1S/C30H53N3O6/c1-19(2)22(14-21-10-11-26(38-8)27(15-21)39-13-9-12-37-7)16-24(31)25(34)17-23(20(3)4)28(35)33-18-30(5,6)29(32)36/h10-11,15,19-20,22-25,34H,9,12-14,16-18,31H2,1-8H3,(H2,32,36)(H,33,35)/t22-,23-,24-,25-/m0/s1	UXOWGYHJODZGMF-QORCZRPOSA-N	3	0.0613816	0.736922	0.738659	8.30988	Mulde	HMP/VMP
Aliskiren	173334-57-1	neg	2010	R4	365	[M+HCOO-]-	InChI=1S/C30H53N3O6/c1-19(2)22(14-21-10-11-26(38-8)27(15-21)39-13-9-12-37-7)16-24(31)25(34)17-23(20(3)4)28(35)33-18-30(5,6)29(32)36/h10-11,15,19-20,22-25,34H,9,12-14,16-18,31H2,1-8H3,(H2,32,36)(H,33,35)/t22-,23-,24-,25-/m0/s1	UXOWGYHJODZGMF-QORCZRPOSA-N	3	0.00426177	0.431316	0.43133	0.988053	Rhine	HMP/VMP
Aliskiren	173334-57-1	neg	2010	R3	365	[M+HCOO-]-	InChI=1S/C30H53N3O6/c1-19(2)22(14-21-10-11-26(38-8)27(15-21)39-13-9-12-37-7)16-24(31)25(34)17-23(20(3)4)28(35)33-18-30(5,6)29(32)36/h10-11,15,19-20,22-25,34H,9,12-14,16-18,31H2,1-8H3,(H2,32,36)(H,33,35)/t22-,23-,24-,25-/m0/s1	UXOWGYHJODZGMF-QORCZRPOSA-N	3	0.0245783	0.458471	0.458902	5.3559	Rhine	HMP/VMP
Aliskiren	173334-57-1	neg	2010	R1	365	[M+HCOO-]-	InChI=1S/C30H53N3O6/c1-19(2)22(14-21-10-11-26(38-8)27(15-21)39-13-9-12-37-7)16-24(31)25(34)17-23(20(3)4)28(35)33-18-30(5,6)29(32)36/h10-11,15,19-20,22-25,34H,9,12-14,16-18,31H2,1-8H3,(H2,32,36)(H,33,35)/t22-,23-,24-,25-/m0/s1	UXOWGYHJODZGMF-QORCZRPOSA-N	3	0.00799949	0.189717	0.189829	4.21405	Rhine	HMP/VMP
Aliskiren	173334-57-1	neg	2010	Sa	365	[M+HCOO-]-	InChI=1S/C30H53N3O6/c1-19(2)22(14-21-10-11-26(38-8)27(15-21)39-13-9-12-37-7)16-24(31)25(34)17-23(20(3)4)28(35)33-18-30(5,6)29(32)36/h10-11,15,19-20,22-25,34H,9,12-14,16-18,31H2,1-8H3,(H2,32,36)(H,33,35)/t22-,23-,24-,25-/m0/s1	UXOWGYHJODZGMF-QORCZRPOSA-N	3	0.0613148	1.09325	1.09442	5.60248	Saale	HMP/VMP
Aliskiren	173334-57-1	neg	2010	S1	365	[M+HCOO-]-	InChI=1S/C30H53N3O6/c1-19(2)22(14-21-10-11-26(38-8)27(15-21)39-13-9-12-37-7)16-24(31)25(34)17-23(20(3)4)28(35)33-18-30(5,6)29(32)36/h10-11,15,19-20,22-25,34H,9,12-14,16-18,31H2,1-8H3,(H2,32,36)(H,33,35)/t22-,23-,24-,25-/m0/s1	UXOWGYHJODZGMF-QORCZRPOSA-N	3	0.123453	0.41646	0.427323	28.8899	Saar	HMP/VMP
Aliskiren	173334-57-1	neg	2010	S2	365	[M+HCOO-]-	InChI=1S/C30H53N3O6/c1-19(2)22(14-21-10-11-26(38-8)27(15-21)39-13-9-12-37-7)16-24(31)25(34)17-23(20(3)4)28(35)33-18-30(5,6)29(32)36/h10-11,15,19-20,22-25,34H,9,12-14,16-18,31H2,1-8H3,(H2,32,36)(H,33,35)/t22-,23-,24-,25-/m0/s1	UXOWGYHJODZGMF-QORCZRPOSA-N	3	0.0164395	0.35009	0.350352	4.69227	Saar	HMP/VMP
Aliskiren	173334-57-1	neg	2011	D3	365	[M+HCOO-]-	InChI=1S/C30H53N3O6/c1-19(2)22(14-21-10-11-26(38-8)27(15-21)39-13-9-12-37-7)16-24(31)25(34)17-23(20(3)4)28(35)33-18-30(5,6)29(32)36/h10-11,15,19-20,22-25,34H,9,12-14,16-18,31H2,1-8H3,(H2,32,36)(H,33,35)/t22-,23-,24-,25-/m0/s1	UXOWGYHJODZGMF-QORCZRPOSA-N	3	0.0159821	0.0580941	0.0594819	26.8689	Danube	HMP/VMP
Aliskiren	173334-57-1	neg	2011	D1	365	[M+HCOO-]-	InChI=1S/C30H53N3O6/c1-19(2)22(14-21-10-11-26(38-8)27(15-21)39-13-9-12-37-7)16-24(31)25(34)17-23(20(3)4)28(35)33-18-30(5,6)29(32)36/h10-11,15,19-20,22-25,34H,9,12-14,16-18,31H2,1-8H3,(H2,32,36)(H,33,35)/t22-,23-,24-,25-/m0/s1	UXOWGYHJODZGMF-QORCZRPOSA-N	3	0.00823543	0.131629	0.131798	6.24854	Danube	HMP/VMP
Aliskiren	173334-57-1	neg	2011	E5	365	[M+HCOO-]-	InChI=1S/C30H53N3O6/c1-19(2)22(14-21-10-11-26(38-8)27(15-21)39-13-9-12-37-7)16-24(31)25(34)17-23(20(3)4)28(35)33-18-30(5,6)29(32)36/h10-11,15,19-20,22-25,34H,9,12-14,16-18,31H2,1-8H3,(H2,32,36)(H,33,35)/t22-,23-,24-,25-/m0/s1	UXOWGYHJODZGMF-QORCZRPOSA-N	3	0.0482881	0.55001	0.551457	8.75646	Elbe	HMP/VMP
Aliskiren	173334-57-1	neg	2011	E4	365	[M+HCOO-]-	InChI=1S/C30H53N3O6/c1-19(2)22(14-21-10-11-26(38-8)27(15-21)39-13-9-12-37-7)16-24(31)25(34)17-23(20(3)4)28(35)33-18-30(5,6)29(32)36/h10-11,15,19-20,22-25,34H,9,12-14,16-18,31H2,1-8H3,(H2,32,36)(H,33,35)/t22-,23-,24-,25-/m0/s1	UXOWGYHJODZGMF-QORCZRPOSA-N	3	0.0567413	0.168833	0.174481	32.52	Elbe	HMP/VMP
Aliskiren	173334-57-1	neg	2011	E2	365	[M+HCOO-]-	InChI=1S/C30H53N3O6/c1-19(2)22(14-21-10-11-26(38-8)27(15-21)39-13-9-12-37-7)16-24(31)25(34)17-23(20(3)4)28(35)33-18-30(5,6)29(32)36/h10-11,15,19-20,22-25,34H,9,12-14,16-18,31H2,1-8H3,(H2,32,36)(H,33,35)/t22-,23-,24-,25-/m0/s1	UXOWGYHJODZGMF-QORCZRPOSA-N	3	0.0313445	0.124468	0.12691	24.6982	Elbe	HMP/VMP
Aliskiren	173334-57-1	neg	2011	Mu	365	[M+HCOO-]-	InChI=1S/C30H53N3O6/c1-19(2)22(14-21-10-11-26(38-8)27(15-21)39-13-9-12-37-7)16-24(31)25(34)17-23(20(3)4)28(35)33-18-30(5,6)29(32)36/h10-11,15,19-20,22-25,34H,9,12-14,16-18,31H2,1-8H3,(H2,32,36)(H,33,35)/t22-,23-,24-,25-/m0/s1	UXOWGYHJODZGMF-QORCZRPOSA-N	3	0.320893	0.580819	0.642141	49.9724	Mulde	HMP/VMP
Aliskiren	173334-57-1	neg	2011	R4	365	[M+HCOO-]-	InChI=1S/C30H53N3O6/c1-19(2)22(14-21-10-11-26(38-8)27(15-21)39-13-9-12-37-7)16-24(31)25(34)17-23(20(3)4)28(35)33-18-30(5,6)29(32)36/h10-11,15,19-20,22-25,34H,9,12-14,16-18,31H2,1-8H3,(H2,32,36)(H,33,35)/t22-,23-,24-,25-/m0/s1	UXOWGYHJODZGMF-QORCZRPOSA-N	3	0.0096942	0.383518	0.383599	2.52717	Rhine	HMP/VMP
Aliskiren	173334-57-1	neg	2011	R3	365	[M+HCOO-]-	InChI=1S/C30H53N3O6/c1-19(2)22(14-21-10-11-26(38-8)27(15-21)39-13-9-12-37-7)16-24(31)25(34)17-23(20(3)4)28(35)33-18-30(5,6)29(32)36/h10-11,15,19-20,22-25,34H,9,12-14,16-18,31H2,1-8H3,(H2,32,36)(H,33,35)/t22-,23-,24-,25-/m0/s1	UXOWGYHJODZGMF-QORCZRPOSA-N	3	0.037571	0.572549	0.573366	6.55269	Rhine	HMP/VMP
Aliskiren	173334-57-1	neg	2011	R1	365	[M+HCOO-]-	InChI=1S/C30H53N3O6/c1-19(2)22(14-21-10-11-26(38-8)27(15-21)39-13-9-12-37-7)16-24(31)25(34)17-23(20(3)4)28(35)33-18-30(5,6)29(32)36/h10-11,15,19-20,22-25,34H,9,12-14,16-18,31H2,1-8H3,(H2,32,36)(H,33,35)/t22-,23-,24-,25-/m0/s1	UXOWGYHJODZGMF-QORCZRPOSA-N	3	0.00942305	0.28817	0.288272	3.2688	Rhine	HMP/VMP
Aliskiren	173334-57-1	neg	2011	Sa	365	[M+HCOO-]-	InChI=1S/C30H53N3O6/c1-19(2)22(14-21-10-11-26(38-8)27(15-21)39-13-9-12-37-7)16-24(31)25(34)17-23(20(3)4)28(35)33-18-30(5,6)29(32)36/h10-11,15,19-20,22-25,34H,9,12-14,16-18,31H2,1-8H3,(H2,32,36)(H,33,35)/t22-,23-,24-,25-/m0/s1	UXOWGYHJODZGMF-QORCZRPOSA-N	3	0.193044	2.06757	2.07349	9.3101	Saale	HMP/VMP
Aliskiren	173334-57-1	neg	2011	S1	365	[M+HCOO-]-	InChI=1S/C30H53N3O6/c1-19(2)22(14-21-10-11-26(38-8)27(15-21)39-13-9-12-37-7)16-24(31)25(34)17-23(20(3)4)28(35)33-18-30(5,6)29(32)36/h10-11,15,19-20,22-25,34H,9,12-14,16-18,31H2,1-8H3,(H2,32,36)(H,33,35)/t22-,23-,24-,25-/m0/s1	UXOWGYHJODZGMF-QORCZRPOSA-N	3	0.213394	0.666386	0.690444	30.9068	Saar	HMP/VMP
Aliskiren	173334-57-1	neg	2011	S2	365	[M+HCOO-]-	InChI=1S/C30H53N3O6/c1-19(2)22(14-21-10-11-26(38-8)27(15-21)39-13-9-12-37-7)16-24(31)25(34)17-23(20(3)4)28(35)33-18-30(5,6)29(32)36/h10-11,15,19-20,22-25,34H,9,12-14,16-18,31H2,1-8H3,(H2,32,36)(H,33,35)/t22-,23-,24-,25-/m0/s1	UXOWGYHJODZGMF-QORCZRPOSA-N	3	0.0170442	0.657737	0.657885	2.59076	Saar	HMP/VMP
Aliskiren	173334-57-1	neg	2012	D3	365	[M+HCOO-]-	InChI=1S/C30H53N3O6/c1-19(2)22(14-21-10-11-26(38-8)27(15-21)39-13-9-12-37-7)16-24(31)25(34)17-23(20(3)4)28(35)33-18-30(5,6)29(32)36/h10-11,15,19-20,22-25,34H,9,12-14,16-18,31H2,1-8H3,(H2,32,36)(H,33,35)/t22-,23-,24-,25-/m0/s1	UXOWGYHJODZGMF-QORCZRPOSA-N	3	0.0320947	0.0813051	0.0851408	37.696	Danube	HMP/VMP
Aliskiren	173334-57-1	neg	2012	D1	365	[M+HCOO-]-	InChI=1S/C30H53N3O6/c1-19(2)22(14-21-10-11-26(38-8)27(15-21)39-13-9-12-37-7)16-24(31)25(34)17-23(20(3)4)28(35)33-18-30(5,6)29(32)36/h10-11,15,19-20,22-25,34H,9,12-14,16-18,31H2,1-8H3,(H2,32,36)(H,33,35)/t22-,23-,24-,25-/m0/s1	UXOWGYHJODZGMF-QORCZRPOSA-N	3	0.0244716	0.162909	0.1642	14.9035	Danube	HMP/VMP
Aliskiren	173334-57-1	neg	2012	E5	365	[M+HCOO-]-	InChI=1S/C30H53N3O6/c1-19(2)22(14-21-10-11-26(38-8)27(15-21)39-13-9-12-37-7)16-24(31)25(34)17-23(20(3)4)28(35)33-18-30(5,6)29(32)36/h10-11,15,19-20,22-25,34H,9,12-14,16-18,31H2,1-8H3,(H2,32,36)(H,33,35)/t22-,23-,24-,25-/m0/s1	UXOWGYHJODZGMF-QORCZRPOSA-N	3	0.0699682	0.695927	0.698182	10.0215	Elbe	HMP/VMP
Aliskiren	173334-57-1	neg	2012	E4	365	[M+HCOO-]-	InChI=1S/C30H53N3O6/c1-19(2)22(14-21-10-11-26(38-8)27(15-21)39-13-9-12-37-7)16-24(31)25(34)17-23(20(3)4)28(35)33-18-30(5,6)29(32)36/h10-11,15,19-20,22-25,34H,9,12-14,16-18,31H2,1-8H3,(H2,32,36)(H,33,35)/t22-,23-,24-,25-/m0/s1	UXOWGYHJODZGMF-QORCZRPOSA-N	3	0.0241265	0.168056	0.169148	14.2636	Elbe	HMP/VMP
Aliskiren	173334-57-1	neg	2012	E2	365	[M+HCOO-]-	InChI=1S/C30H53N3O6/c1-19(2)22(14-21-10-11-26(38-8)27(15-21)39-13-9-12-37-7)16-24(31)25(34)17-23(20(3)4)28(35)33-18-30(5,6)29(32)36/h10-11,15,19-20,22-25,34H,9,12-14,16-18,31H2,1-8H3,(H2,32,36)(H,33,35)/t22-,23-,24-,25-/m0/s1	UXOWGYHJODZGMF-QORCZRPOSA-N	3	0.0125552	0.13591	0.136295	9.21176	Elbe	HMP/VMP
Aliskiren	173334-57-1	neg	2012	Mu	365	[M+HCOO-]-	InChI=1S/C30H53N3O6/c1-19(2)22(14-21-10-11-26(38-8)27(15-21)39-13-9-12-37-7)16-24(31)25(34)17-23(20(3)4)28(35)33-18-30(5,6)29(32)36/h10-11,15,19-20,22-25,34H,9,12-14,16-18,31H2,1-8H3,(H2,32,36)(H,33,35)/t22-,23-,24-,25-/m0/s1	UXOWGYHJODZGMF-QORCZRPOSA-N	3	0.130337	1.01586	1.02155	12.7588	Mulde	HMP/VMP
Aliskiren	173334-57-1	neg	2012	R4	365	[M+HCOO-]-	InChI=1S/C30H53N3O6/c1-19(2)22(14-21-10-11-26(38-8)27(15-21)39-13-9-12-37-7)16-24(31)25(34)17-23(20(3)4)28(35)33-18-30(5,6)29(32)36/h10-11,15,19-20,22-25,34H,9,12-14,16-18,31H2,1-8H3,(H2,32,36)(H,33,35)/t22-,23-,24-,25-/m0/s1	UXOWGYHJODZGMF-QORCZRPOSA-N	3	0.0184946	0.440306	0.440562	4.19794	Rhine	HMP/VMP
Aliskiren	173334-57-1	neg	2012	R3	365	[M+HCOO-]-	InChI=1S/C30H53N3O6/c1-19(2)22(14-21-10-11-26(38-8)27(15-21)39-13-9-12-37-7)16-24(31)25(34)17-23(20(3)4)28(35)33-18-30(5,6)29(32)36/h10-11,15,19-20,22-25,34H,9,12-14,16-18,31H2,1-8H3,(H2,32,36)(H,33,35)/t22-,23-,24-,25-/m0/s1	UXOWGYHJODZGMF-QORCZRPOSA-N	3	0.112426	0.542685	0.549905	20.4446	Rhine	HMP/VMP
Aliskiren	173334-57-1	neg	2012	R1	365	[M+HCOO-]-	InChI=1S/C30H53N3O6/c1-19(2)22(14-21-10-11-26(38-8)27(15-21)39-13-9-12-37-7)16-24(31)25(34)17-23(20(3)4)28(35)33-18-30(5,6)29(32)36/h10-11,15,19-20,22-25,34H,9,12-14,16-18,31H2,1-8H3,(H2,32,36)(H,33,35)/t22-,23-,24-,25-/m0/s1	UXOWGYHJODZGMF-QORCZRPOSA-N	3	0.00551223	0.139206	0.139279	3.95768	Rhine	HMP/VMP
Aliskiren	173334-57-1	neg	2012	Sa	365	[M+HCOO-]-	InChI=1S/C30H53N3O6/c1-19(2)22(14-21-10-11-26(38-8)27(15-21)39-13-9-12-37-7)16-24(31)25(34)17-23(20(3)4)28(35)33-18-30(5,6)29(32)36/h10-11,15,19-20,22-25,34H,9,12-14,16-18,31H2,1-8H3,(H2,32,36)(H,33,35)/t22-,23-,24-,25-/m0/s1	UXOWGYHJODZGMF-QORCZRPOSA-N	3	0.162832	1.84718	1.85209	8.79183	Saale	HMP/VMP
Aliskiren	173334-57-1	neg	2012	S1	365	[M+HCOO-]-	InChI=1S/C30H53N3O6/c1-19(2)22(14-21-10-11-26(38-8)27(15-21)39-13-9-12-37-7)16-24(31)25(34)17-23(20(3)4)28(35)33-18-30(5,6)29(32)36/h10-11,15,19-20,22-25,34H,9,12-14,16-18,31H2,1-8H3,(H2,32,36)(H,33,35)/t22-,23-,24-,25-/m0/s1	UXOWGYHJODZGMF-QORCZRPOSA-N	3	0.137639	0.585941	0.595885	23.0983	Saar	HMP/VMP
Aliskiren	173334-57-1	neg	2012	S2	365	[M+HCOO-]-	InChI=1S/C30H53N3O6/c1-19(2)22(14-21-10-11-26(38-8)27(15-21)39-13-9-12-37-7)16-24(31)25(34)17-23(20(3)4)28(35)33-18-30(5,6)29(32)36/h10-11,15,19-20,22-25,34H,9,12-14,16-18,31H2,1-8H3,(H2,32,36)(H,33,35)/t22-,23-,24-,25-/m0/s1	UXOWGYHJODZGMF-QORCZRPOSA-N	3	0.0667709	0.900569	0.902182	7.40105	Saar	HMP/VMP
Aliskiren	173334-57-1	neg	2013	D3	365	[M+HCOO-]-	InChI=1S/C30H53N3O6/c1-19(2)22(14-21-10-11-26(38-8)27(15-21)39-13-9-12-37-7)16-24(31)25(34)17-23(20(3)4)28(35)33-18-30(5,6)29(32)36/h10-11,15,19-20,22-25,34H,9,12-14,16-18,31H2,1-8H3,(H2,32,36)(H,33,35)/t22-,23-,24-,25-/m0/s1	UXOWGYHJODZGMF-QORCZRPOSA-N	3	0.00610364	0.0250521	0.0255468	23.892	Danube	HMP/VMP
Aliskiren	173334-57-1	neg	2013	D1	365	[M+HCOO-]-	InChI=1S/C30H53N3O6/c1-19(2)22(14-21-10-11-26(38-8)27(15-21)39-13-9-12-37-7)16-24(31)25(34)17-23(20(3)4)28(35)33-18-30(5,6)29(32)36/h10-11,15,19-20,22-25,34H,9,12-14,16-18,31H2,1-8H3,(H2,32,36)(H,33,35)/t22-,23-,24-,25-/m0/s1	UXOWGYHJODZGMF-QORCZRPOSA-N	3	0.0131986	0.0907872	0.0914494	14.4327	Danube	HMP/VMP
Aliskiren	173334-57-1	neg	2013	E5	365	[M+HCOO-]-	InChI=1S/C30H53N3O6/c1-19(2)22(14-21-10-11-26(38-8)27(15-21)39-13-9-12-37-7)16-24(31)25(34)17-23(20(3)4)28(35)33-18-30(5,6)29(32)36/h10-11,15,19-20,22-25,34H,9,12-14,16-18,31H2,1-8H3,(H2,32,36)(H,33,35)/t22-,23-,24-,25-/m0/s1	UXOWGYHJODZGMF-QORCZRPOSA-N	3	0.0143061	0.233133	0.233422	6.12887	Elbe	HMP/VMP
Aliskiren	173334-57-1	neg	2013	E4	365	[M+HCOO-]-	InChI=1S/C30H53N3O6/c1-19(2)22(14-21-10-11-26(38-8)27(15-21)39-13-9-12-37-7)16-24(31)25(34)17-23(20(3)4)28(35)33-18-30(5,6)29(32)36/h10-11,15,19-20,22-25,34H,9,12-14,16-18,31H2,1-8H3,(H2,32,36)(H,33,35)/t22-,23-,24-,25-/m0/s1	UXOWGYHJODZGMF-QORCZRPOSA-N	3	0.108585	0.149495	0.169229	64.1647	Elbe	HMP/VMP
Aliskiren	173334-57-1	neg	2013	E2	365	[M+HCOO-]-	InChI=1S/C30H53N3O6/c1-19(2)22(14-21-10-11-26(38-8)27(15-21)39-13-9-12-37-7)16-24(31)25(34)17-23(20(3)4)28(35)33-18-30(5,6)29(32)36/h10-11,15,19-20,22-25,34H,9,12-14,16-18,31H2,1-8H3,(H2,32,36)(H,33,35)/t22-,23-,24-,25-/m0/s1	UXOWGYHJODZGMF-QORCZRPOSA-N	2	0.0234958	0.055284	0.0577265	40.7019	Elbe	HMP/VMP
Aliskiren	173334-57-1	neg	2013	Mu	365	[M+HCOO-]-	InChI=1S/C30H53N3O6/c1-19(2)22(14-21-10-11-26(38-8)27(15-21)39-13-9-12-37-7)16-24(31)25(34)17-23(20(3)4)28(35)33-18-30(5,6)29(32)36/h10-11,15,19-20,22-25,34H,9,12-14,16-18,31H2,1-8H3,(H2,32,36)(H,33,35)/t22-,23-,24-,25-/m0/s1	UXOWGYHJODZGMF-QORCZRPOSA-N	3	0.0393393	0.486276	0.487349	8.07212	Mulde	HMP/VMP
Aliskiren	173334-57-1	neg	2013	R4	365	[M+HCOO-]-	InChI=1S/C30H53N3O6/c1-19(2)22(14-21-10-11-26(38-8)27(15-21)39-13-9-12-37-7)16-24(31)25(34)17-23(20(3)4)28(35)33-18-30(5,6)29(32)36/h10-11,15,19-20,22-25,34H,9,12-14,16-18,31H2,1-8H3,(H2,32,36)(H,33,35)/t22-,23-,24-,25-/m0/s1	UXOWGYHJODZGMF-QORCZRPOSA-N	3	0.0122286	0.286974	0.287148	4.25863	Rhine	HMP/VMP
Aliskiren	173334-57-1	neg	2013	R3	365	[M+HCOO-]-	InChI=1S/C30H53N3O6/c1-19(2)22(14-21-10-11-26(38-8)27(15-21)39-13-9-12-37-7)16-24(31)25(34)17-23(20(3)4)28(35)33-18-30(5,6)29(32)36/h10-11,15,19-20,22-25,34H,9,12-14,16-18,31H2,1-8H3,(H2,32,36)(H,33,35)/t22-,23-,24-,25-/m0/s1	UXOWGYHJODZGMF-QORCZRPOSA-N	3	0.0200412	0.287942	0.288417	6.94871	Rhine	HMP/VMP
Aliskiren	173334-57-1	neg	2013	R1	365	[M+HCOO-]-	InChI=1S/C30H53N3O6/c1-19(2)22(14-21-10-11-26(38-8)27(15-21)39-13-9-12-37-7)16-24(31)25(34)17-23(20(3)4)28(35)33-18-30(5,6)29(32)36/h10-11,15,19-20,22-25,34H,9,12-14,16-18,31H2,1-8H3,(H2,32,36)(H,33,35)/t22-,23-,24-,25-/m0/s1	UXOWGYHJODZGMF-QORCZRPOSA-N	3	0.00177964	0.085471	0.0854833	2.08186	Rhine	HMP/VMP
Aliskiren	173334-57-1	neg	2013	Sa	365	[M+HCOO-]-	InChI=1S/C30H53N3O6/c1-19(2)22(14-21-10-11-26(38-8)27(15-21)39-13-9-12-37-7)16-24(31)25(34)17-23(20(3)4)28(35)33-18-30(5,6)29(32)36/h10-11,15,19-20,22-25,34H,9,12-14,16-18,31H2,1-8H3,(H2,32,36)(H,33,35)/t22-,23-,24-,25-/m0/s1	UXOWGYHJODZGMF-QORCZRPOSA-N	3	0.106612	0.902877	0.907258	11.7511	Saale	HMP/VMP
Aliskiren	173334-57-1	neg	2013	S1	365	[M+HCOO-]-	InChI=1S/C30H53N3O6/c1-19(2)22(14-21-10-11-26(38-8)27(15-21)39-13-9-12-37-7)16-24(31)25(34)17-23(20(3)4)28(35)33-18-30(5,6)29(32)36/h10-11,15,19-20,22-25,34H,9,12-14,16-18,31H2,1-8H3,(H2,32,36)(H,33,35)/t22-,23-,24-,25-/m0/s1	UXOWGYHJODZGMF-QORCZRPOSA-N	3	0.0993524	0.414822	0.422218	23.5311	Saar	HMP/VMP
Aliskiren	173334-57-1	neg	2013	S2	365	[M+HCOO-]-	InChI=1S/C30H53N3O6/c1-19(2)22(14-21-10-11-26(38-8)27(15-21)39-13-9-12-37-7)16-24(31)25(34)17-23(20(3)4)28(35)33-18-30(5,6)29(32)36/h10-11,15,19-20,22-25,34H,9,12-14,16-18,31H2,1-8H3,(H2,32,36)(H,33,35)/t22-,23-,24-,25-/m0/s1	UXOWGYHJODZGMF-QORCZRPOSA-N	3	0.0255555	0.481715	0.482165	5.30016	Saar	HMP/VMP
Aliskiren	173334-57-1	neg	2014	D3	365	[M+HCOO-]-	InChI=1S/C30H53N3O6/c1-19(2)22(14-21-10-11-26(38-8)27(15-21)39-13-9-12-37-7)16-24(31)25(34)17-23(20(3)4)28(35)33-18-30(5,6)29(32)36/h10-11,15,19-20,22-25,34H,9,12-14,16-18,31H2,1-8H3,(H2,32,36)(H,33,35)/t22-,23-,24-,25-/m0/s1	UXOWGYHJODZGMF-QORCZRPOSA-N	3	0.00311091	0.0198339	0.0199911	15.5615	Danube	HMP/VMP
Aliskiren	173334-57-1	neg	2014	D1	365	[M+HCOO-]-	InChI=1S/C30H53N3O6/c1-19(2)22(14-21-10-11-26(38-8)27(15-21)39-13-9-12-37-7)16-24(31)25(34)17-23(20(3)4)28(35)33-18-30(5,6)29(32)36/h10-11,15,19-20,22-25,34H,9,12-14,16-18,31H2,1-8H3,(H2,32,36)(H,33,35)/t22-,23-,24-,25-/m0/s1	UXOWGYHJODZGMF-QORCZRPOSA-N	3	0.00597329	0.0942292	0.0943585	6.33042	Danube	HMP/VMP
Aliskiren	173334-57-1	neg	2014	E5	365	[M+HCOO-]-	InChI=1S/C30H53N3O6/c1-19(2)22(14-21-10-11-26(38-8)27(15-21)39-13-9-12-37-7)16-24(31)25(34)17-23(20(3)4)28(35)33-18-30(5,6)29(32)36/h10-11,15,19-20,22-25,34H,9,12-14,16-18,31H2,1-8H3,(H2,32,36)(H,33,35)/t22-,23-,24-,25-/m0/s1	UXOWGYHJODZGMF-QORCZRPOSA-N	3	0.0222585	0.239324	0.23999	9.27473	Elbe	HMP/VMP
Aliskiren	173334-57-1	neg	2014	E4	365	[M+HCOO-]-	InChI=1S/C30H53N3O6/c1-19(2)22(14-21-10-11-26(38-8)27(15-21)39-13-9-12-37-7)16-24(31)25(34)17-23(20(3)4)28(35)33-18-30(5,6)29(32)36/h10-11,15,19-20,22-25,34H,9,12-14,16-18,31H2,1-8H3,(H2,32,36)(H,33,35)/t22-,23-,24-,25-/m0/s1	UXOWGYHJODZGMF-QORCZRPOSA-N	3	0.0745641	0.0977061	0.111853	66.6627	Elbe	HMP/VMP
Aliskiren	173334-57-1	neg	2014	E2	365	[M+HCOO-]-	InChI=1S/C30H53N3O6/c1-19(2)22(14-21-10-11-26(38-8)27(15-21)39-13-9-12-37-7)16-24(31)25(34)17-23(20(3)4)28(35)33-18-30(5,6)29(32)36/h10-11,15,19-20,22-25,34H,9,12-14,16-18,31H2,1-8H3,(H2,32,36)(H,33,35)/t22-,23-,24-,25-/m0/s1	UXOWGYHJODZGMF-QORCZRPOSA-N	3	0.00839068	0.0353999	0.0361187	23.2308	Elbe	HMP/VMP
Aliskiren	173334-57-1	neg	2014	Mu	365	[M+HCOO-]-	InChI=1S/C30H53N3O6/c1-19(2)22(14-21-10-11-26(38-8)27(15-21)39-13-9-12-37-7)16-24(31)25(34)17-23(20(3)4)28(35)33-18-30(5,6)29(32)36/h10-11,15,19-20,22-25,34H,9,12-14,16-18,31H2,1-8H3,(H2,32,36)(H,33,35)/t22-,23-,24-,25-/m0/s1	UXOWGYHJODZGMF-QORCZRPOSA-N	3	0.0752291	0.482085	0.486096	15.4762	Mulde	HMP/VMP
Aliskiren	173334-57-1	neg	2014	R4	365	[M+HCOO-]-	InChI=1S/C30H53N3O6/c1-19(2)22(14-21-10-11-26(38-8)27(15-21)39-13-9-12-37-7)16-24(31)25(34)17-23(20(3)4)28(35)33-18-30(5,6)29(32)36/h10-11,15,19-20,22-25,34H,9,12-14,16-18,31H2,1-8H3,(H2,32,36)(H,33,35)/t22-,23-,24-,25-/m0/s1	UXOWGYHJODZGMF-QORCZRPOSA-N	3	0.0194033	0.289595	0.290038	6.68992	Rhine	HMP/VMP
Aliskiren	173334-57-1	neg	2014	R3	365	[M+HCOO-]-	InChI=1S/C30H53N3O6/c1-19(2)22(14-21-10-11-26(38-8)27(15-21)39-13-9-12-37-7)16-24(31)25(34)17-23(20(3)4)28(35)33-18-30(5,6)29(32)36/h10-11,15,19-20,22-25,34H,9,12-14,16-18,31H2,1-8H3,(H2,32,36)(H,33,35)/t22-,23-,24-,25-/m0/s1	UXOWGYHJODZGMF-QORCZRPOSA-N	3	0.0229564	0.247344	0.248074	9.25384	Rhine	HMP/VMP
Aliskiren	173334-57-1	neg	2014	R1	365	[M+HCOO-]-	InChI=1S/C30H53N3O6/c1-19(2)22(14-21-10-11-26(38-8)27(15-21)39-13-9-12-37-7)16-24(31)25(34)17-23(20(3)4)28(35)33-18-30(5,6)29(32)36/h10-11,15,19-20,22-25,34H,9,12-14,16-18,31H2,1-8H3,(H2,32,36)(H,33,35)/t22-,23-,24-,25-/m0/s1	UXOWGYHJODZGMF-QORCZRPOSA-N	3	0.00418667	0.106984	0.107039	3.91135	Rhine	HMP/VMP
Aliskiren	173334-57-1	neg	2014	Sa	365	[M+HCOO-]-	InChI=1S/C30H53N3O6/c1-19(2)22(14-21-10-11-26(38-8)27(15-21)39-13-9-12-37-7)16-24(31)25(34)17-23(20(3)4)28(35)33-18-30(5,6)29(32)36/h10-11,15,19-20,22-25,34H,9,12-14,16-18,31H2,1-8H3,(H2,32,36)(H,33,35)/t22-,23-,24-,25-/m0/s1	UXOWGYHJODZGMF-QORCZRPOSA-N	3	0.103203	0.959407	0.9632	10.7146	Saale	HMP/VMP
Aliskiren	173334-57-1	neg	2014	S1	365	[M+HCOO-]-	InChI=1S/C30H53N3O6/c1-19(2)22(14-21-10-11-26(38-8)27(15-21)39-13-9-12-37-7)16-24(31)25(34)17-23(20(3)4)28(35)33-18-30(5,6)29(32)36/h10-11,15,19-20,22-25,34H,9,12-14,16-18,31H2,1-8H3,(H2,32,36)(H,33,35)/t22-,23-,24-,25-/m0/s1	UXOWGYHJODZGMF-QORCZRPOSA-N	3	0.12905	0.281771	0.298235	43.2711	Saar	HMP/VMP
Aliskiren	173334-57-1	neg	2014	S2	365	[M+HCOO-]-	InChI=1S/C30H53N3O6/c1-19(2)22(14-21-10-11-26(38-8)27(15-21)39-13-9-12-37-7)16-24(31)25(34)17-23(20(3)4)28(35)33-18-30(5,6)29(32)36/h10-11,15,19-20,22-25,34H,9,12-14,16-18,31H2,1-8H3,(H2,32,36)(H,33,35)/t22-,23-,24-,25-/m0/s1	UXOWGYHJODZGMF-QORCZRPOSA-N	3	0.0392166	0.353654	0.355043	11.0456	Saar	HMP/VMP
Aliskiren	173334-57-1	neg	2015	D3	365	[M+HCOO-]-	InChI=1S/C30H53N3O6/c1-19(2)22(14-21-10-11-26(38-8)27(15-21)39-13-9-12-37-7)16-24(31)25(34)17-23(20(3)4)28(35)33-18-30(5,6)29(32)36/h10-11,15,19-20,22-25,34H,9,12-14,16-18,31H2,1-8H3,(H2,32,36)(H,33,35)/t22-,23-,24-,25-/m0/s1	UXOWGYHJODZGMF-QORCZRPOSA-N	2	0.00441865	0.0267781	0.0269598	16.3898	Danube	HMP/VMP
Aliskiren	173334-57-1	neg	2015	D1	365	[M+HCOO-]-	InChI=1S/C30H53N3O6/c1-19(2)22(14-21-10-11-26(38-8)27(15-21)39-13-9-12-37-7)16-24(31)25(34)17-23(20(3)4)28(35)33-18-30(5,6)29(32)36/h10-11,15,19-20,22-25,34H,9,12-14,16-18,31H2,1-8H3,(H2,32,36)(H,33,35)/t22-,23-,24-,25-/m0/s1	UXOWGYHJODZGMF-QORCZRPOSA-N	3	0.00538	0.048091	0.0482914	11.1407	Danube	HMP/VMP
Aliskiren	173334-57-1	neg	2015	E5	365	[M+HCOO-]-	InChI=1S/C30H53N3O6/c1-19(2)22(14-21-10-11-26(38-8)27(15-21)39-13-9-12-37-7)16-24(31)25(34)17-23(20(3)4)28(35)33-18-30(5,6)29(32)36/h10-11,15,19-20,22-25,34H,9,12-14,16-18,31H2,1-8H3,(H2,32,36)(H,33,35)/t22-,23-,24-,25-/m0/s1	UXOWGYHJODZGMF-QORCZRPOSA-N	3	0.00427444	0.161856	0.161894	2.64028	Elbe	HMP/VMP
Aliskiren	173334-57-1	neg	2015	E4	365	[M+HCOO-]-	InChI=1S/C30H53N3O6/c1-19(2)22(14-21-10-11-26(38-8)27(15-21)39-13-9-12-37-7)16-24(31)25(34)17-23(20(3)4)28(35)33-18-30(5,6)29(32)36/h10-11,15,19-20,22-25,34H,9,12-14,16-18,31H2,1-8H3,(H2,32,36)(H,33,35)/t22-,23-,24-,25-/m0/s1	UXOWGYHJODZGMF-QORCZRPOSA-N	3	0.073674	0.0725399	0.0893848	82.4235	Elbe	HMP/VMP
Aliskiren	173334-57-1	neg	2015	E2	365	[M+HCOO-]-	InChI=1S/C30H53N3O6/c1-19(2)22(14-21-10-11-26(38-8)27(15-21)39-13-9-12-37-7)16-24(31)25(34)17-23(20(3)4)28(35)33-18-30(5,6)29(32)36/h10-11,15,19-20,22-25,34H,9,12-14,16-18,31H2,1-8H3,(H2,32,36)(H,33,35)/t22-,23-,24-,25-/m0/s1	UXOWGYHJODZGMF-QORCZRPOSA-N	2	0.0236679	0.0473585	0.0502286	47.1204	Elbe	HMP/VMP
Aliskiren	173334-57-1	neg	2015	Mu	365	[M+HCOO-]-	InChI=1S/C30H53N3O6/c1-19(2)22(14-21-10-11-26(38-8)27(15-21)39-13-9-12-37-7)16-24(31)25(34)17-23(20(3)4)28(35)33-18-30(5,6)29(32)36/h10-11,15,19-20,22-25,34H,9,12-14,16-18,31H2,1-8H3,(H2,32,36)(H,33,35)/t22-,23-,24-,25-/m0/s1	UXOWGYHJODZGMF-QORCZRPOSA-N	3	0.143261	0.616696	0.627798	22.8197	Mulde	HMP/VMP
Aliskiren	173334-57-1	neg	2015	R4	365	[M+HCOO-]-	InChI=1S/C30H53N3O6/c1-19(2)22(14-21-10-11-26(38-8)27(15-21)39-13-9-12-37-7)16-24(31)25(34)17-23(20(3)4)28(35)33-18-30(5,6)29(32)36/h10-11,15,19-20,22-25,34H,9,12-14,16-18,31H2,1-8H3,(H2,32,36)(H,33,35)/t22-,23-,24-,25-/m0/s1	UXOWGYHJODZGMF-QORCZRPOSA-N	3	0.00445503	0.247459	0.247486	1.80011	Rhine	HMP/VMP
Aliskiren	173334-57-1	neg	2015	R3	365	[M+HCOO-]-	InChI=1S/C30H53N3O6/c1-19(2)22(14-21-10-11-26(38-8)27(15-21)39-13-9-12-37-7)16-24(31)25(34)17-23(20(3)4)28(35)33-18-30(5,6)29(32)36/h10-11,15,19-20,22-25,34H,9,12-14,16-18,31H2,1-8H3,(H2,32,36)(H,33,35)/t22-,23-,24-,25-/m0/s1	UXOWGYHJODZGMF-QORCZRPOSA-N	3	0.00549386	0.190167	0.19022	2.88817	Rhine	HMP/VMP
Aliskiren	173334-57-1	neg	2015	R1	365	[M+HCOO-]-	InChI=1S/C30H53N3O6/c1-19(2)22(14-21-10-11-26(38-8)27(15-21)39-13-9-12-37-7)16-24(31)25(34)17-23(20(3)4)28(35)33-18-30(5,6)29(32)36/h10-11,15,19-20,22-25,34H,9,12-14,16-18,31H2,1-8H3,(H2,32,36)(H,33,35)/t22-,23-,24-,25-/m0/s1	UXOWGYHJODZGMF-QORCZRPOSA-N	3	0.00308228	0.0630721	0.0631232	4.88296	Rhine	HMP/VMP
Aliskiren	173334-57-1	neg	2015	Sa	365	[M+HCOO-]-	InChI=1S/C30H53N3O6/c1-19(2)22(14-21-10-11-26(38-8)27(15-21)39-13-9-12-37-7)16-24(31)25(34)17-23(20(3)4)28(35)33-18-30(5,6)29(32)36/h10-11,15,19-20,22-25,34H,9,12-14,16-18,31H2,1-8H3,(H2,32,36)(H,33,35)/t22-,23-,24-,25-/m0/s1	UXOWGYHJODZGMF-QORCZRPOSA-N	3	0.0992916	0.651287	0.656361	15.1276	Saale	HMP/VMP
Aliskiren	173334-57-1	neg	2015	S1	365	[M+HCOO-]-	InChI=1S/C30H53N3O6/c1-19(2)22(14-21-10-11-26(38-8)27(15-21)39-13-9-12-37-7)16-24(31)25(34)17-23(20(3)4)28(35)33-18-30(5,6)29(32)36/h10-11,15,19-20,22-25,34H,9,12-14,16-18,31H2,1-8H3,(H2,32,36)(H,33,35)/t22-,23-,24-,25-/m0/s1	UXOWGYHJODZGMF-QORCZRPOSA-N	2	0.116484	0.299041	0.310177	37.554	Saar	HMP/VMP
Aliskiren	173334-57-1	neg	2015	S2	365	[M+HCOO-]-	InChI=1S/C30H53N3O6/c1-19(2)22(14-21-10-11-26(38-8)27(15-21)39-13-9-12-37-7)16-24(31)25(34)17-23(20(3)4)28(35)33-18-30(5,6)29(32)36/h10-11,15,19-20,22-25,34H,9,12-14,16-18,31H2,1-8H3,(H2,32,36)(H,33,35)/t22-,23-,24-,25-/m0/s1	UXOWGYHJODZGMF-QORCZRPOSA-N	3	0.021865	0.227351	0.228061	9.58734	Saar	HMP/VMP
Aliskiren	173334-57-1	neg	2016	D3	365	[M+HCOO-]-	InChI=1S/C30H53N3O6/c1-19(2)22(14-21-10-11-26(38-8)27(15-21)39-13-9-12-37-7)16-24(31)25(34)17-23(20(3)4)28(35)33-18-30(5,6)29(32)36/h10-11,15,19-20,22-25,34H,9,12-14,16-18,31H2,1-8H3,(H2,32,36)(H,33,35)/t22-,23-,24-,25-/m0/s1	UXOWGYHJODZGMF-QORCZRPOSA-N	3	0.00551253	0.0230402	0.0235012	23.4564	Danube	HMP/VMP
Aliskiren	173334-57-1	neg	2016	D1	365	[M+HCOO-]-	InChI=1S/C30H53N3O6/c1-19(2)22(14-21-10-11-26(38-8)27(15-21)39-13-9-12-37-7)16-24(31)25(34)17-23(20(3)4)28(35)33-18-30(5,6)29(32)36/h10-11,15,19-20,22-25,34H,9,12-14,16-18,31H2,1-8H3,(H2,32,36)(H,33,35)/t22-,23-,24-,25-/m0/s1	UXOWGYHJODZGMF-QORCZRPOSA-N	3	0.00882025	0.0453756	0.045948	19.1962	Danube	HMP/VMP
Aliskiren	173334-57-1	neg	2016	E5	365	[M+HCOO-]-	InChI=1S/C30H53N3O6/c1-19(2)22(14-21-10-11-26(38-8)27(15-21)39-13-9-12-37-7)16-24(31)25(34)17-23(20(3)4)28(35)33-18-30(5,6)29(32)36/h10-11,15,19-20,22-25,34H,9,12-14,16-18,31H2,1-8H3,(H2,32,36)(H,33,35)/t22-,23-,24-,25-/m0/s1	UXOWGYHJODZGMF-QORCZRPOSA-N	3	0.055651	0.138047	0.144829	38.4254	Elbe	HMP/VMP
Aliskiren	173334-57-1	neg	2016	E4	365	[M+HCOO-]-	InChI=1S/C30H53N3O6/c1-19(2)22(14-21-10-11-26(38-8)27(15-21)39-13-9-12-37-7)16-24(31)25(34)17-23(20(3)4)28(35)33-18-30(5,6)29(32)36/h10-11,15,19-20,22-25,34H,9,12-14,16-18,31H2,1-8H3,(H2,32,36)(H,33,35)/t22-,23-,24-,25-/m0/s1	UXOWGYHJODZGMF-QORCZRPOSA-N	3	0.0935806	0.130073	0.147526	63.4333	Elbe	HMP/VMP
Aliskiren	173334-57-1	neg	2016	E2	365	[M+HCOO-]-	InChI=1S/C30H53N3O6/c1-19(2)22(14-21-10-11-26(38-8)27(15-21)39-13-9-12-37-7)16-24(31)25(34)17-23(20(3)4)28(35)33-18-30(5,6)29(32)36/h10-11,15,19-20,22-25,34H,9,12-14,16-18,31H2,1-8H3,(H2,32,36)(H,33,35)/t22-,23-,24-,25-/m0/s1	UXOWGYHJODZGMF-QORCZRPOSA-N	2	0.00418459	0.0427503	0.0428526	9.76508	Elbe	HMP/VMP
Aliskiren	173334-57-1	neg	2016	Mu	365	[M+HCOO-]-	InChI=1S/C30H53N3O6/c1-19(2)22(14-21-10-11-26(38-8)27(15-21)39-13-9-12-37-7)16-24(31)25(34)17-23(20(3)4)28(35)33-18-30(5,6)29(32)36/h10-11,15,19-20,22-25,34H,9,12-14,16-18,31H2,1-8H3,(H2,32,36)(H,33,35)/t22-,23-,24-,25-/m0/s1	UXOWGYHJODZGMF-QORCZRPOSA-N	3	0.0283304	0.58932	0.589772	4.80363	Mulde	HMP/VMP
Aliskiren	173334-57-1	neg	2016	R4	365	[M+HCOO-]-	InChI=1S/C30H53N3O6/c1-19(2)22(14-21-10-11-26(38-8)27(15-21)39-13-9-12-37-7)16-24(31)25(34)17-23(20(3)4)28(35)33-18-30(5,6)29(32)36/h10-11,15,19-20,22-25,34H,9,12-14,16-18,31H2,1-8H3,(H2,32,36)(H,33,35)/t22-,23-,24-,25-/m0/s1	UXOWGYHJODZGMF-QORCZRPOSA-N	3	0.0138607	0.252304	0.252555	5.48819	Rhine	HMP/VMP
Aliskiren	173334-57-1	neg	2016	R3	365	[M+HCOO-]-	InChI=1S/C30H53N3O6/c1-19(2)22(14-21-10-11-26(38-8)27(15-21)39-13-9-12-37-7)16-24(31)25(34)17-23(20(3)4)28(35)33-18-30(5,6)29(32)36/h10-11,15,19-20,22-25,34H,9,12-14,16-18,31H2,1-8H3,(H2,32,36)(H,33,35)/t22-,23-,24-,25-/m0/s1	UXOWGYHJODZGMF-QORCZRPOSA-N	3	0.0475371	0.239616	0.242687	19.5878	Rhine	HMP/VMP
Aliskiren	173334-57-1	neg	2016	R1	365	[M+HCOO-]-	InChI=1S/C30H53N3O6/c1-19(2)22(14-21-10-11-26(38-8)27(15-21)39-13-9-12-37-7)16-24(31)25(34)17-23(20(3)4)28(35)33-18-30(5,6)29(32)36/h10-11,15,19-20,22-25,34H,9,12-14,16-18,31H2,1-8H3,(H2,32,36)(H,33,35)/t22-,23-,24-,25-/m0/s1	UXOWGYHJODZGMF-QORCZRPOSA-N	3	0.00696287	0.0872392	0.0874196	7.96488	Rhine	HMP/VMP
Aliskiren	173334-57-1	neg	2016	Sa	365	[M+HCOO-]-	InChI=1S/C30H53N3O6/c1-19(2)22(14-21-10-11-26(38-8)27(15-21)39-13-9-12-37-7)16-24(31)25(34)17-23(20(3)4)28(35)33-18-30(5,6)29(32)36/h10-11,15,19-20,22-25,34H,9,12-14,16-18,31H2,1-8H3,(H2,32,36)(H,33,35)/t22-,23-,24-,25-/m0/s1	UXOWGYHJODZGMF-QORCZRPOSA-N	3	0.0365948	0.684144	0.684785	5.34399	Saale	HMP/VMP
Aliskiren	173334-57-1	neg	2016	S1	365	[M+HCOO-]-	InChI=1S/C30H53N3O6/c1-19(2)22(14-21-10-11-26(38-8)27(15-21)39-13-9-12-37-7)16-24(31)25(34)17-23(20(3)4)28(35)33-18-30(5,6)29(32)36/h10-11,15,19-20,22-25,34H,9,12-14,16-18,31H2,1-8H3,(H2,32,36)(H,33,35)/t22-,23-,24-,25-/m0/s1	UXOWGYHJODZGMF-QORCZRPOSA-N	3	0.00589069	0.280945	0.280987	2.09643	Saar	HMP/VMP
Aliskiren	173334-57-1	neg	2016	S2	365	[M+HCOO-]-	InChI=1S/C30H53N3O6/c1-19(2)22(14-21-10-11-26(38-8)27(15-21)39-13-9-12-37-7)16-24(31)25(34)17-23(20(3)4)28(35)33-18-30(5,6)29(32)36/h10-11,15,19-20,22-25,34H,9,12-14,16-18,31H2,1-8H3,(H2,32,36)(H,33,35)/t22-,23-,24-,25-/m0/s1	UXOWGYHJODZGMF-QORCZRPOSA-N	3	0.0587698	0.390692	0.393471	14.9362	Saar	HMP/VMP
Aliskiren	173334-57-1	neg	2017	D3	365	[M+HCOO-]-	InChI=1S/C30H53N3O6/c1-19(2)22(14-21-10-11-26(38-8)27(15-21)39-13-9-12-37-7)16-24(31)25(34)17-23(20(3)4)28(35)33-18-30(5,6)29(32)36/h10-11,15,19-20,22-25,34H,9,12-14,16-18,31H2,1-8H3,(H2,32,36)(H,33,35)/t22-,23-,24-,25-/m0/s1	UXOWGYHJODZGMF-QORCZRPOSA-N	3	0.00508864	0.0183826	0.0188033	27.0625	Danube	HMP/VMP
Aliskiren	173334-57-1	neg	2017	D1	365	[M+HCOO-]-	InChI=1S/C30H53N3O6/c1-19(2)22(14-21-10-11-26(38-8)27(15-21)39-13-9-12-37-7)16-24(31)25(34)17-23(20(3)4)28(35)33-18-30(5,6)29(32)36/h10-11,15,19-20,22-25,34H,9,12-14,16-18,31H2,1-8H3,(H2,32,36)(H,33,35)/t22-,23-,24-,25-/m0/s1	UXOWGYHJODZGMF-QORCZRPOSA-N	3	0.00767776	0.0358274	0.0363889	21.0992	Danube	HMP/VMP
Aliskiren	173334-57-1	neg	2017	E5	365	[M+HCOO-]-	InChI=1S/C30H53N3O6/c1-19(2)22(14-21-10-11-26(38-8)27(15-21)39-13-9-12-37-7)16-24(31)25(34)17-23(20(3)4)28(35)33-18-30(5,6)29(32)36/h10-11,15,19-20,22-25,34H,9,12-14,16-18,31H2,1-8H3,(H2,32,36)(H,33,35)/t22-,23-,24-,25-/m0/s1	UXOWGYHJODZGMF-QORCZRPOSA-N	3	0.0646076	0.0644403	0.08656	74.639	Elbe	HMP/VMP
Aliskiren	173334-57-1	neg	2017	E4	365	[M+HCOO-]-	InChI=1S/C30H53N3O6/c1-19(2)22(14-21-10-11-26(38-8)27(15-21)39-13-9-12-37-7)16-24(31)25(34)17-23(20(3)4)28(35)33-18-30(5,6)29(32)36/h10-11,15,19-20,22-25,34H,9,12-14,16-18,31H2,1-8H3,(H2,32,36)(H,33,35)/t22-,23-,24-,25-/m0/s1	UXOWGYHJODZGMF-QORCZRPOSA-N	3	0.0703878	0.111356	0.123001	57.2256	Elbe	HMP/VMP
Aliskiren	173334-57-1	neg	2017	Mu	365	[M+HCOO-]-	InChI=1S/C30H53N3O6/c1-19(2)22(14-21-10-11-26(38-8)27(15-21)39-13-9-12-37-7)16-24(31)25(34)17-23(20(3)4)28(35)33-18-30(5,6)29(32)36/h10-11,15,19-20,22-25,34H,9,12-14,16-18,31H2,1-8H3,(H2,32,36)(H,33,35)/t22-,23-,24-,25-/m0/s1	UXOWGYHJODZGMF-QORCZRPOSA-N	3	0.0867039	0.489426	0.494869	17.5206	Mulde	HMP/VMP
Aliskiren	173334-57-1	neg	2017	R4	365	[M+HCOO-]-	InChI=1S/C30H53N3O6/c1-19(2)22(14-21-10-11-26(38-8)27(15-21)39-13-9-12-37-7)16-24(31)25(34)17-23(20(3)4)28(35)33-18-30(5,6)29(32)36/h10-11,15,19-20,22-25,34H,9,12-14,16-18,31H2,1-8H3,(H2,32,36)(H,33,35)/t22-,23-,24-,25-/m0/s1	UXOWGYHJODZGMF-QORCZRPOSA-N	3	0.0056747	0.221362	0.221411	2.56297	Rhine	HMP/VMP
Aliskiren	173334-57-1	neg	2017	R3	365	[M+HCOO-]-	InChI=1S/C30H53N3O6/c1-19(2)22(14-21-10-11-26(38-8)27(15-21)39-13-9-12-37-7)16-24(31)25(34)17-23(20(3)4)28(35)33-18-30(5,6)29(32)36/h10-11,15,19-20,22-25,34H,9,12-14,16-18,31H2,1-8H3,(H2,32,36)(H,33,35)/t22-,23-,24-,25-/m0/s1	UXOWGYHJODZGMF-QORCZRPOSA-N	3	0.010452	0.234776	0.234929	4.44902	Rhine	HMP/VMP
Aliskiren	173334-57-1	neg	2017	R1	365	[M+HCOO-]-	InChI=1S/C30H53N3O6/c1-19(2)22(14-21-10-11-26(38-8)27(15-21)39-13-9-12-37-7)16-24(31)25(34)17-23(20(3)4)28(35)33-18-30(5,6)29(32)36/h10-11,15,19-20,22-25,34H,9,12-14,16-18,31H2,1-8H3,(H2,32,36)(H,33,35)/t22-,23-,24-,25-/m0/s1	UXOWGYHJODZGMF-QORCZRPOSA-N	3	0.00707485	0.0763539	0.0765787	9.23866	Rhine	HMP/VMP
Aliskiren	173334-57-1	neg	2017	Sa	365	[M+HCOO-]-	InChI=1S/C30H53N3O6/c1-19(2)22(14-21-10-11-26(38-8)27(15-21)39-13-9-12-37-7)16-24(31)25(34)17-23(20(3)4)28(35)33-18-30(5,6)29(32)36/h10-11,15,19-20,22-25,34H,9,12-14,16-18,31H2,1-8H3,(H2,32,36)(H,33,35)/t22-,23-,24-,25-/m0/s1	UXOWGYHJODZGMF-QORCZRPOSA-N	3	0.0633587	0.495881	0.498705	12.7047	Saale	HMP/VMP
Aliskiren	173334-57-1	neg	2017	S1	365	[M+HCOO-]-	InChI=1S/C30H53N3O6/c1-19(2)22(14-21-10-11-26(38-8)27(15-21)39-13-9-12-37-7)16-24(31)25(34)17-23(20(3)4)28(35)33-18-30(5,6)29(32)36/h10-11,15,19-20,22-25,34H,9,12-14,16-18,31H2,1-8H3,(H2,32,36)(H,33,35)/t22-,23-,24-,25-/m0/s1	UXOWGYHJODZGMF-QORCZRPOSA-N	3	0.015562	0.269711	0.270017	5.76334	Saar	HMP/VMP
Aliskiren	173334-57-1	neg	2017	S2	365	[M+HCOO-]-	InChI=1S/C30H53N3O6/c1-19(2)22(14-21-10-11-26(38-8)27(15-21)39-13-9-12-37-7)16-24(31)25(34)17-23(20(3)4)28(35)33-18-30(5,6)29(32)36/h10-11,15,19-20,22-25,34H,9,12-14,16-18,31H2,1-8H3,(H2,32,36)(H,33,35)/t22-,23-,24-,25-/m0/s1	UXOWGYHJODZGMF-QORCZRPOSA-N	3	0.0126844	0.446324	0.446443	2.84122	Saar	HMP/VMP
Aliskiren	173334-57-1	neg	2018	D3	365	[M+HCOO-]-	InChI=1S/C30H53N3O6/c1-19(2)22(14-21-10-11-26(38-8)27(15-21)39-13-9-12-37-7)16-24(31)25(34)17-23(20(3)4)28(35)33-18-30(5,6)29(32)36/h10-11,15,19-20,22-25,34H,9,12-14,16-18,31H2,1-8H3,(H2,32,36)(H,33,35)/t22-,23-,24-,25-/m0/s1	UXOWGYHJODZGMF-QORCZRPOSA-N	2	0.00157204	0.0324515	0.0324705	4.84145	Danube	HMP/VMP
Aliskiren	173334-57-1	neg	2018	E5	365	[M+HCOO-]-	InChI=1S/C30H53N3O6/c1-19(2)22(14-21-10-11-26(38-8)27(15-21)39-13-9-12-37-7)16-24(31)25(34)17-23(20(3)4)28(35)33-18-30(5,6)29(32)36/h10-11,15,19-20,22-25,34H,9,12-14,16-18,31H2,1-8H3,(H2,32,36)(H,33,35)/t22-,23-,24-,25-/m0/s1	UXOWGYHJODZGMF-QORCZRPOSA-N	3	0.00675568	0.138573	0.138681	4.87139	Elbe	HMP/VMP
Aliskiren	173334-57-1	neg	2018	E4	365	[M+HCOO-]-	InChI=1S/C30H53N3O6/c1-19(2)22(14-21-10-11-26(38-8)27(15-21)39-13-9-12-37-7)16-24(31)25(34)17-23(20(3)4)28(35)33-18-30(5,6)29(32)36/h10-11,15,19-20,22-25,34H,9,12-14,16-18,31H2,1-8H3,(H2,32,36)(H,33,35)/t22-,23-,24-,25-/m0/s1	UXOWGYHJODZGMF-QORCZRPOSA-N	3	0.0232101	0.0406358	0.0445011	52.1562	Elbe	HMP/VMP
Aliskiren	173334-57-1	neg	2018	Mu	365	[M+HCOO-]-	InChI=1S/C30H53N3O6/c1-19(2)22(14-21-10-11-26(38-8)27(15-21)39-13-9-12-37-7)16-24(31)25(34)17-23(20(3)4)28(35)33-18-30(5,6)29(32)36/h10-11,15,19-20,22-25,34H,9,12-14,16-18,31H2,1-8H3,(H2,32,36)(H,33,35)/t22-,23-,24-,25-/m0/s1	UXOWGYHJODZGMF-QORCZRPOSA-N	2	0.0299766	0.265599	0.266444	11.2506	Mulde	HMP/VMP
Aliskiren	173334-57-1	neg	2018	R4	365	[M+HCOO-]-	InChI=1S/C30H53N3O6/c1-19(2)22(14-21-10-11-26(38-8)27(15-21)39-13-9-12-37-7)16-24(31)25(34)17-23(20(3)4)28(35)33-18-30(5,6)29(32)36/h10-11,15,19-20,22-25,34H,9,12-14,16-18,31H2,1-8H3,(H2,32,36)(H,33,35)/t22-,23-,24-,25-/m0/s1	UXOWGYHJODZGMF-QORCZRPOSA-N	3	0.00845357	0.14176	0.141924	5.95639	Rhine	HMP/VMP
Aliskiren	173334-57-1	neg	2018	R3	365	[M+HCOO-]-	InChI=1S/C30H53N3O6/c1-19(2)22(14-21-10-11-26(38-8)27(15-21)39-13-9-12-37-7)16-24(31)25(34)17-23(20(3)4)28(35)33-18-30(5,6)29(32)36/h10-11,15,19-20,22-25,34H,9,12-14,16-18,31H2,1-8H3,(H2,32,36)(H,33,35)/t22-,23-,24-,25-/m0/s1	UXOWGYHJODZGMF-QORCZRPOSA-N	3	0.0260718	0.160876	0.162353	16.0587	Rhine	HMP/VMP
Aliskiren	173334-57-1	neg	2018	R1	365	[M+HCOO-]-	InChI=1S/C30H53N3O6/c1-19(2)22(14-21-10-11-26(38-8)27(15-21)39-13-9-12-37-7)16-24(31)25(34)17-23(20(3)4)28(35)33-18-30(5,6)29(32)36/h10-11,15,19-20,22-25,34H,9,12-14,16-18,31H2,1-8H3,(H2,32,36)(H,33,35)/t22-,23-,24-,25-/m0/s1	UXOWGYHJODZGMF-QORCZRPOSA-N	2	0.00861932	0.0672226	0.0674983	12.7697	Rhine	HMP/VMP
Aliskiren	173334-57-1	neg	2018	Sa	365	[M+HCOO-]-	InChI=1S/C30H53N3O6/c1-19(2)22(14-21-10-11-26(38-8)27(15-21)39-13-9-12-37-7)16-24(31)25(34)17-23(20(3)4)28(35)33-18-30(5,6)29(32)36/h10-11,15,19-20,22-25,34H,9,12-14,16-18,31H2,1-8H3,(H2,32,36)(H,33,35)/t22-,23-,24-,25-/m0/s1	UXOWGYHJODZGMF-QORCZRPOSA-N	3	0.0121435	0.328942	0.329093	3.68999	Saale	HMP/VMP
Aliskiren	173334-57-1	neg	2018	S2	365	[M+HCOO-]-	InChI=1S/C30H53N3O6/c1-19(2)22(14-21-10-11-26(38-8)27(15-21)39-13-9-12-37-7)16-24(31)25(34)17-23(20(3)4)28(35)33-18-30(5,6)29(32)36/h10-11,15,19-20,22-25,34H,9,12-14,16-18,31H2,1-8H3,(H2,32,36)(H,33,35)/t22-,23-,24-,25-/m0/s1	UXOWGYHJODZGMF-QORCZRPOSA-N	3	0.0240138	0.230523	0.231368	10.379	Saar	HMP/VMP
Aliskiren	173334-57-1	neg	2019	D3	365	[M+HCOO-]-	InChI=1S/C30H53N3O6/c1-19(2)22(14-21-10-11-26(38-8)27(15-21)39-13-9-12-37-7)16-24(31)25(34)17-23(20(3)4)28(35)33-18-30(5,6)29(32)36/h10-11,15,19-20,22-25,34H,9,12-14,16-18,31H2,1-8H3,(H2,32,36)(H,33,35)/t22-,23-,24-,25-/m0/s1	UXOWGYHJODZGMF-QORCZRPOSA-N	2	0.00144094	0.00850936	0.00857014	16.8135	Danube	HMP/VMP
Aliskiren	173334-57-1	neg	2019	D1	365	[M+HCOO-]-	InChI=1S/C30H53N3O6/c1-19(2)22(14-21-10-11-26(38-8)27(15-21)39-13-9-12-37-7)16-24(31)25(34)17-23(20(3)4)28(35)33-18-30(5,6)29(32)36/h10-11,15,19-20,22-25,34H,9,12-14,16-18,31H2,1-8H3,(H2,32,36)(H,33,35)/t22-,23-,24-,25-/m0/s1	UXOWGYHJODZGMF-QORCZRPOSA-N	3	0.00294245	0.0224974	0.0226317	13.0014	Danube	HMP/VMP
Aliskiren	173334-57-1	neg	2019	E5	365	[M+HCOO-]-	InChI=1S/C30H53N3O6/c1-19(2)22(14-21-10-11-26(38-8)27(15-21)39-13-9-12-37-7)16-24(31)25(34)17-23(20(3)4)28(35)33-18-30(5,6)29(32)36/h10-11,15,19-20,22-25,34H,9,12-14,16-18,31H2,1-8H3,(H2,32,36)(H,33,35)/t22-,23-,24-,25-/m0/s1	UXOWGYHJODZGMF-QORCZRPOSA-N	3	0.0125236	0.0914821	0.0920537	13.6047	Elbe	HMP/VMP
Aliskiren	173334-57-1	neg	2019	E4	365	[M+HCOO-]-	InChI=1S/C30H53N3O6/c1-19(2)22(14-21-10-11-26(38-8)27(15-21)39-13-9-12-37-7)16-24(31)25(34)17-23(20(3)4)28(35)33-18-30(5,6)29(32)36/h10-11,15,19-20,22-25,34H,9,12-14,16-18,31H2,1-8H3,(H2,32,36)(H,33,35)/t22-,23-,24-,25-/m0/s1	UXOWGYHJODZGMF-QORCZRPOSA-N	2	0.0305213	0.0598476	0.06362	47.9743	Elbe	HMP/VMP
Aliskiren	173334-57-1	neg	2019	E2	365	[M+HCOO-]-	InChI=1S/C30H53N3O6/c1-19(2)22(14-21-10-11-26(38-8)27(15-21)39-13-9-12-37-7)16-24(31)25(34)17-23(20(3)4)28(35)33-18-30(5,6)29(32)36/h10-11,15,19-20,22-25,34H,9,12-14,16-18,31H2,1-8H3,(H2,32,36)(H,33,35)/t22-,23-,24-,25-/m0/s1	UXOWGYHJODZGMF-QORCZRPOSA-N	2	0.00406206	0.0165133	0.0167612	24.2349	Elbe	HMP/VMP
Aliskiren	173334-57-1	neg	2019	Mu	365	[M+HCOO-]-	InChI=1S/C30H53N3O6/c1-19(2)22(14-21-10-11-26(38-8)27(15-21)39-13-9-12-37-7)16-24(31)25(34)17-23(20(3)4)28(35)33-18-30(5,6)29(32)36/h10-11,15,19-20,22-25,34H,9,12-14,16-18,31H2,1-8H3,(H2,32,36)(H,33,35)/t22-,23-,24-,25-/m0/s1	UXOWGYHJODZGMF-QORCZRPOSA-N	3	0.0460337	0.351993	0.353917	13.0069	Mulde	HMP/VMP
Aliskiren	173334-57-1	neg	2019	R4	365	[M+HCOO-]-	InChI=1S/C30H53N3O6/c1-19(2)22(14-21-10-11-26(38-8)27(15-21)39-13-9-12-37-7)16-24(31)25(34)17-23(20(3)4)28(35)33-18-30(5,6)29(32)36/h10-11,15,19-20,22-25,34H,9,12-14,16-18,31H2,1-8H3,(H2,32,36)(H,33,35)/t22-,23-,24-,25-/m0/s1	UXOWGYHJODZGMF-QORCZRPOSA-N	2	0.0138599	0.0642225	0.0649659	21.3341	Rhine	HMP/VMP
Aliskiren	173334-57-1	neg	2019	R3	365	[M+HCOO-]-	InChI=1S/C30H53N3O6/c1-19(2)22(14-21-10-11-26(38-8)27(15-21)39-13-9-12-37-7)16-24(31)25(34)17-23(20(3)4)28(35)33-18-30(5,6)29(32)36/h10-11,15,19-20,22-25,34H,9,12-14,16-18,31H2,1-8H3,(H2,32,36)(H,33,35)/t22-,23-,24-,25-/m0/s1	UXOWGYHJODZGMF-QORCZRPOSA-N	3	0.0124829	0.0604016	0.0612967	20.3647	Rhine	HMP/VMP
Aliskiren	173334-57-1	neg	2019	Sa	365	[M+HCOO-]-	InChI=1S/C30H53N3O6/c1-19(2)22(14-21-10-11-26(38-8)27(15-21)39-13-9-12-37-7)16-24(31)25(34)17-23(20(3)4)28(35)33-18-30(5,6)29(32)36/h10-11,15,19-20,22-25,34H,9,12-14,16-18,31H2,1-8H3,(H2,32,36)(H,33,35)/t22-,23-,24-,25-/m0/s1	UXOWGYHJODZGMF-QORCZRPOSA-N	3	0.136811	0.177323	0.212504	64.3803	Saale	HMP/VMP
Aliskiren	173334-57-1	neg	2019	S2	365	[M+HCOO-]-	InChI=1S/C30H53N3O6/c1-19(2)22(14-21-10-11-26(38-8)27(15-21)39-13-9-12-37-7)16-24(31)25(34)17-23(20(3)4)28(35)33-18-30(5,6)29(32)36/h10-11,15,19-20,22-25,34H,9,12-14,16-18,31H2,1-8H3,(H2,32,36)(H,33,35)/t22-,23-,24-,25-/m0/s1	UXOWGYHJODZGMF-QORCZRPOSA-N	3	0.017512	0.174471	0.175044	10.0044	Saar	HMP/VMP
Aliskiren	173334-57-1	neg	2020	D3	365	[M+HCOO-]-	InChI=1S/C30H53N3O6/c1-19(2)22(14-21-10-11-26(38-8)27(15-21)39-13-9-12-37-7)16-24(31)25(34)17-23(20(3)4)28(35)33-18-30(5,6)29(32)36/h10-11,15,19-20,22-25,34H,9,12-14,16-18,31H2,1-8H3,(H2,32,36)(H,33,35)/t22-,23-,24-,25-/m0/s1	UXOWGYHJODZGMF-QORCZRPOSA-N	3	0.00136413	0.00708964	0.00718071	18.9971	Danube	HMP/VMP
Aliskiren	173334-57-1	neg	2020	D1	365	[M+HCOO-]-	InChI=1S/C30H53N3O6/c1-19(2)22(14-21-10-11-26(38-8)27(15-21)39-13-9-12-37-7)16-24(31)25(34)17-23(20(3)4)28(35)33-18-30(5,6)29(32)36/h10-11,15,19-20,22-25,34H,9,12-14,16-18,31H2,1-8H3,(H2,32,36)(H,33,35)/t22-,23-,24-,25-/m0/s1	UXOWGYHJODZGMF-QORCZRPOSA-N	2	0.000248304	0.0180775	0.0180784	1.37349	Danube	HMP/VMP
Aliskiren	173334-57-1	neg	2020	E5	365	[M+HCOO-]-	InChI=1S/C30H53N3O6/c1-19(2)22(14-21-10-11-26(38-8)27(15-21)39-13-9-12-37-7)16-24(31)25(34)17-23(20(3)4)28(35)33-18-30(5,6)29(32)36/h10-11,15,19-20,22-25,34H,9,12-14,16-18,31H2,1-8H3,(H2,32,36)(H,33,35)/t22-,23-,24-,25-/m0/s1	UXOWGYHJODZGMF-QORCZRPOSA-N	3	0.0168709	0.0471136	0.0488606	34.5287	Elbe	HMP/VMP
Aliskiren	173334-57-1	neg	2020	E4	365	[M+HCOO-]-	InChI=1S/C30H53N3O6/c1-19(2)22(14-21-10-11-26(38-8)27(15-21)39-13-9-12-37-7)16-24(31)25(34)17-23(20(3)4)28(35)33-18-30(5,6)29(32)36/h10-11,15,19-20,22-25,34H,9,12-14,16-18,31H2,1-8H3,(H2,32,36)(H,33,35)/t22-,23-,24-,25-/m0/s1	UXOWGYHJODZGMF-QORCZRPOSA-N	3	0.03587	0.0443378	0.0514199	69.7591	Elbe	HMP/VMP
Aliskiren	173334-57-1	neg	2020	Mu	365	[M+HCOO-]-	InChI=1S/C30H53N3O6/c1-19(2)22(14-21-10-11-26(38-8)27(15-21)39-13-9-12-37-7)16-24(31)25(34)17-23(20(3)4)28(35)33-18-30(5,6)29(32)36/h10-11,15,19-20,22-25,34H,9,12-14,16-18,31H2,1-8H3,(H2,32,36)(H,33,35)/t22-,23-,24-,25-/m0/s1	UXOWGYHJODZGMF-QORCZRPOSA-N	3	0.032314	0.235517	0.23706	13.6311	Mulde	HMP/VMP
Aliskiren	173334-57-1	neg	2020	R3	365	[M+HCOO-]-	InChI=1S/C30H53N3O6/c1-19(2)22(14-21-10-11-26(38-8)27(15-21)39-13-9-12-37-7)16-24(31)25(34)17-23(20(3)4)28(35)33-18-30(5,6)29(32)36/h10-11,15,19-20,22-25,34H,9,12-14,16-18,31H2,1-8H3,(H2,32,36)(H,33,35)/t22-,23-,24-,25-/m0/s1	UXOWGYHJODZGMF-QORCZRPOSA-N	3	0.0154643	0.107656	0.10836	14.2713	Rhine	HMP/VMP
Aliskiren	173334-57-1	neg	2020	Sa	365	[M+HCOO-]-	InChI=1S/C30H53N3O6/c1-19(2)22(14-21-10-11-26(38-8)27(15-21)39-13-9-12-37-7)16-24(31)25(34)17-23(20(3)4)28(35)33-18-30(5,6)29(32)36/h10-11,15,19-20,22-25,34H,9,12-14,16-18,31H2,1-8H3,(H2,32,36)(H,33,35)/t22-,23-,24-,25-/m0/s1	UXOWGYHJODZGMF-QORCZRPOSA-N	3	0.0391802	0.278066	0.28	13.993	Saale	HMP/VMP
Aliskiren	173334-57-1	neg	2020	S1	365	[M+HCOO-]-	InChI=1S/C30H53N3O6/c1-19(2)22(14-21-10-11-26(38-8)27(15-21)39-13-9-12-37-7)16-24(31)25(34)17-23(20(3)4)28(35)33-18-30(5,6)29(32)36/h10-11,15,19-20,22-25,34H,9,12-14,16-18,31H2,1-8H3,(H2,32,36)(H,33,35)/t22-,23-,24-,25-/m0/s1	UXOWGYHJODZGMF-QORCZRPOSA-N	2	0.000176732	0.0475607	0.0475609	0.371592	Saar	HMP/VMP
Aliskiren	173334-57-1	neg	2020	S2	365	[M+HCOO-]-	InChI=1S/C30H53N3O6/c1-19(2)22(14-21-10-11-26(38-8)27(15-21)39-13-9-12-37-7)16-24(31)25(34)17-23(20(3)4)28(35)33-18-30(5,6)29(32)36/h10-11,15,19-20,22-25,34H,9,12-14,16-18,31H2,1-8H3,(H2,32,36)(H,33,35)/t22-,23-,24-,25-/m0/s1	UXOWGYHJODZGMF-QORCZRPOSA-N	3	0.0018474	0.110766	0.110777	1.66768	Saar	HMP/VMP
Aliskiren	173334-57-1	neg	2021	D3	365	[M+HCOO-]-	InChI=1S/C30H53N3O6/c1-19(2)22(14-21-10-11-26(38-8)27(15-21)39-13-9-12-37-7)16-24(31)25(34)17-23(20(3)4)28(35)33-18-30(5,6)29(32)36/h10-11,15,19-20,22-25,34H,9,12-14,16-18,31H2,1-8H3,(H2,32,36)(H,33,35)/t22-,23-,24-,25-/m0/s1	UXOWGYHJODZGMF-QORCZRPOSA-N	3	0.000920256	0.00551114	0.00555956	16.5527	Danube	HMP/VMP
Aliskiren	173334-57-1	neg	2021	D1	365	[M+HCOO-]-	InChI=1S/C30H53N3O6/c1-19(2)22(14-21-10-11-26(38-8)27(15-21)39-13-9-12-37-7)16-24(31)25(34)17-23(20(3)4)28(35)33-18-30(5,6)29(32)36/h10-11,15,19-20,22-25,34H,9,12-14,16-18,31H2,1-8H3,(H2,32,36)(H,33,35)/t22-,23-,24-,25-/m0/s1	UXOWGYHJODZGMF-QORCZRPOSA-N	2	0.00497085	0.0135815	0.0140289	35.4328	Danube	HMP/VMP
Aliskiren	173334-57-1	neg	2021	E5	365	[M+HCOO-]-	InChI=1S/C30H53N3O6/c1-19(2)22(14-21-10-11-26(38-8)27(15-21)39-13-9-12-37-7)16-24(31)25(34)17-23(20(3)4)28(35)33-18-30(5,6)29(32)36/h10-11,15,19-20,22-25,34H,9,12-14,16-18,31H2,1-8H3,(H2,32,36)(H,33,35)/t22-,23-,24-,25-/m0/s1	UXOWGYHJODZGMF-QORCZRPOSA-N	3	0.00238292	0.0537648	0.0538005	4.42918	Elbe	HMP/VMP
Aliskiren	173334-57-1	neg	2021	E4	365	[M+HCOO-]-	InChI=1S/C30H53N3O6/c1-19(2)22(14-21-10-11-26(38-8)27(15-21)39-13-9-12-37-7)16-24(31)25(34)17-23(20(3)4)28(35)33-18-30(5,6)29(32)36/h10-11,15,19-20,22-25,34H,9,12-14,16-18,31H2,1-8H3,(H2,32,36)(H,33,35)/t22-,23-,24-,25-/m0/s1	UXOWGYHJODZGMF-QORCZRPOSA-N	2	0.0103154	0.0368081	0.0375238	27.4903	Elbe	HMP/VMP
Aliskiren	173334-57-1	neg	2021	Mu	365	[M+HCOO-]-	InChI=1S/C30H53N3O6/c1-19(2)22(14-21-10-11-26(38-8)27(15-21)39-13-9-12-37-7)16-24(31)25(34)17-23(20(3)4)28(35)33-18-30(5,6)29(32)36/h10-11,15,19-20,22-25,34H,9,12-14,16-18,31H2,1-8H3,(H2,32,36)(H,33,35)/t22-,23-,24-,25-/m0/s1	UXOWGYHJODZGMF-QORCZRPOSA-N	3	0.0123368	0.314141	0.314305	3.92509	Mulde	HMP/VMP
Aliskiren	173334-57-1	neg	2021	R4	365	[M+HCOO-]-	InChI=1S/C30H53N3O6/c1-19(2)22(14-21-10-11-26(38-8)27(15-21)39-13-9-12-37-7)16-24(31)25(34)17-23(20(3)4)28(35)33-18-30(5,6)29(32)36/h10-11,15,19-20,22-25,34H,9,12-14,16-18,31H2,1-8H3,(H2,32,36)(H,33,35)/t22-,23-,24-,25-/m0/s1	UXOWGYHJODZGMF-QORCZRPOSA-N	3	0.00642649	0.0482057	0.048478	13.2565	Rhine	HMP/VMP
Aliskiren	173334-57-1	neg	2021	R3	365	[M+HCOO-]-	InChI=1S/C30H53N3O6/c1-19(2)22(14-21-10-11-26(38-8)27(15-21)39-13-9-12-37-7)16-24(31)25(34)17-23(20(3)4)28(35)33-18-30(5,6)29(32)36/h10-11,15,19-20,22-25,34H,9,12-14,16-18,31H2,1-8H3,(H2,32,36)(H,33,35)/t22-,23-,24-,25-/m0/s1	UXOWGYHJODZGMF-QORCZRPOSA-N	3	0.0109726	0.0652383	0.0658162	16.6716	Rhine	HMP/VMP
Aliskiren	173334-57-1	neg	2021	R1	365	[M+HCOO-]-	InChI=1S/C30H53N3O6/c1-19(2)22(14-21-10-11-26(38-8)27(15-21)39-13-9-12-37-7)16-24(31)25(34)17-23(20(3)4)28(35)33-18-30(5,6)29(32)36/h10-11,15,19-20,22-25,34H,9,12-14,16-18,31H2,1-8H3,(H2,32,36)(H,33,35)/t22-,23-,24-,25-/m0/s1	UXOWGYHJODZGMF-QORCZRPOSA-N	2	0.00233617	0.0182068	0.0182816	12.7788	Rhine	HMP/VMP
Aliskiren	173334-57-1	neg	2021	Sa	365	[M+HCOO-]-	InChI=1S/C30H53N3O6/c1-19(2)22(14-21-10-11-26(38-8)27(15-21)39-13-9-12-37-7)16-24(31)25(34)17-23(20(3)4)28(35)33-18-30(5,6)29(32)36/h10-11,15,19-20,22-25,34H,9,12-14,16-18,31H2,1-8H3,(H2,32,36)(H,33,35)/t22-,23-,24-,25-/m0/s1	UXOWGYHJODZGMF-QORCZRPOSA-N	3	0.0229996	0.25864	0.259341	8.86849	Saale	HMP/VMP
Aliskiren	173334-57-1	neg	2021	S1	365	[M+HCOO-]-	InChI=1S/C30H53N3O6/c1-19(2)22(14-21-10-11-26(38-8)27(15-21)39-13-9-12-37-7)16-24(31)25(34)17-23(20(3)4)28(35)33-18-30(5,6)29(32)36/h10-11,15,19-20,22-25,34H,9,12-14,16-18,31H2,1-8H3,(H2,32,36)(H,33,35)/t22-,23-,24-,25-/m0/s1	UXOWGYHJODZGMF-QORCZRPOSA-N	3	0.0437725	0.053261	0.062318	70.2406	Saar	HMP/VMP
Aliskiren	173334-57-1	neg	2021	S2	365	[M+HCOO-]-	InChI=1S/C30H53N3O6/c1-19(2)22(14-21-10-11-26(38-8)27(15-21)39-13-9-12-37-7)16-24(31)25(34)17-23(20(3)4)28(35)33-18-30(5,6)29(32)36/h10-11,15,19-20,22-25,34H,9,12-14,16-18,31H2,1-8H3,(H2,32,36)(H,33,35)/t22-,23-,24-,25-/m0/s1	UXOWGYHJODZGMF-QORCZRPOSA-N	3	0.0232392	0.10261	0.104412	22.2572	Saar	HMP/VMP
Aliskiren	173334-57-1	neg	2022	D1	365	[M+HCOO-]-	InChI=1S/C30H53N3O6/c1-19(2)22(14-21-10-11-26(38-8)27(15-21)39-13-9-12-37-7)16-24(31)25(34)17-23(20(3)4)28(35)33-18-30(5,6)29(32)36/h10-11,15,19-20,22-25,34H,9,12-14,16-18,31H2,1-8H3,(H2,32,36)(H,33,35)/t22-,23-,24-,25-/m0/s1	UXOWGYHJODZGMF-QORCZRPOSA-N	3	0.00360344	0.0227568	0.0229359	15.7109	Danube	HMP/VMP
Aliskiren	173334-57-1	neg	2022	E5	365	[M+HCOO-]-	InChI=1S/C30H53N3O6/c1-19(2)22(14-21-10-11-26(38-8)27(15-21)39-13-9-12-37-7)16-24(31)25(34)17-23(20(3)4)28(35)33-18-30(5,6)29(32)36/h10-11,15,19-20,22-25,34H,9,12-14,16-18,31H2,1-8H3,(H2,32,36)(H,33,35)/t22-,23-,24-,25-/m0/s1	UXOWGYHJODZGMF-QORCZRPOSA-N	3	0.00399071	0.0351901	0.0353442	11.291	Elbe	HMP/VMP
Aliskiren	173334-57-1	neg	2022	E4	365	[M+HCOO-]-	InChI=1S/C30H53N3O6/c1-19(2)22(14-21-10-11-26(38-8)27(15-21)39-13-9-12-37-7)16-24(31)25(34)17-23(20(3)4)28(35)33-18-30(5,6)29(32)36/h10-11,15,19-20,22-25,34H,9,12-14,16-18,31H2,1-8H3,(H2,32,36)(H,33,35)/t22-,23-,24-,25-/m0/s1	UXOWGYHJODZGMF-QORCZRPOSA-N	2	0.0352281	0.144187	0.146323	24.0756	Elbe	HMP/VMP
Aliskiren	173334-57-1	neg	2022	R4	365	[M+HCOO-]-	InChI=1S/C30H53N3O6/c1-19(2)22(14-21-10-11-26(38-8)27(15-21)39-13-9-12-37-7)16-24(31)25(34)17-23(20(3)4)28(35)33-18-30(5,6)29(32)36/h10-11,15,19-20,22-25,34H,9,12-14,16-18,31H2,1-8H3,(H2,32,36)(H,33,35)/t22-,23-,24-,25-/m0/s1	UXOWGYHJODZGMF-QORCZRPOSA-N	3	0.00732508	0.0386374	0.0390798	18.7439	Rhine	HMP/VMP
Aliskiren	173334-57-1	neg	2022	R3	365	[M+HCOO-]-	InChI=1S/C30H53N3O6/c1-19(2)22(14-21-10-11-26(38-8)27(15-21)39-13-9-12-37-7)16-24(31)25(34)17-23(20(3)4)28(35)33-18-30(5,6)29(32)36/h10-11,15,19-20,22-25,34H,9,12-14,16-18,31H2,1-8H3,(H2,32,36)(H,33,35)/t22-,23-,24-,25-/m0/s1	UXOWGYHJODZGMF-QORCZRPOSA-N	3	0.00462399	0.0660478	0.0661553	6.9896	Rhine	HMP/VMP
Aliskiren	173334-57-1	neg	2022	R1	365	[M+HCOO-]-	InChI=1S/C30H53N3O6/c1-19(2)22(14-21-10-11-26(38-8)27(15-21)39-13-9-12-37-7)16-24(31)25(34)17-23(20(3)4)28(35)33-18-30(5,6)29(32)36/h10-11,15,19-20,22-25,34H,9,12-14,16-18,31H2,1-8H3,(H2,32,36)(H,33,35)/t22-,23-,24-,25-/m0/s1	UXOWGYHJODZGMF-QORCZRPOSA-N	3	0.00609202	0.0289149	0.0293675	20.7441	Rhine	HMP/VMP
Aliskiren	173334-57-1	neg	2022	Sa	365	[M+HCOO-]-	InChI=1S/C30H53N3O6/c1-19(2)22(14-21-10-11-26(38-8)27(15-21)39-13-9-12-37-7)16-24(31)25(34)17-23(20(3)4)28(35)33-18-30(5,6)29(32)36/h10-11,15,19-20,22-25,34H,9,12-14,16-18,31H2,1-8H3,(H2,32,36)(H,33,35)/t22-,23-,24-,25-/m0/s1	UXOWGYHJODZGMF-QORCZRPOSA-N	2	0.00693803	0.180138	0.180205	3.85008	Saale	HMP/VMP
Aliskiren	173334-57-1	neg	2022	S1	365	[M+HCOO-]-	InChI=1S/C30H53N3O6/c1-19(2)22(14-21-10-11-26(38-8)27(15-21)39-13-9-12-37-7)16-24(31)25(34)17-23(20(3)4)28(35)33-18-30(5,6)29(32)36/h10-11,15,19-20,22-25,34H,9,12-14,16-18,31H2,1-8H3,(H2,32,36)(H,33,35)/t22-,23-,24-,25-/m0/s1	UXOWGYHJODZGMF-QORCZRPOSA-N	3	0.00298081	0.0345822	0.0346687	8.59799	Saar	HMP/VMP
Aliskiren	173334-57-1	neg	2022	S2	365	[M+HCOO-]-	InChI=1S/C30H53N3O6/c1-19(2)22(14-21-10-11-26(38-8)27(15-21)39-13-9-12-37-7)16-24(31)25(34)17-23(20(3)4)28(35)33-18-30(5,6)29(32)36/h10-11,15,19-20,22-25,34H,9,12-14,16-18,31H2,1-8H3,(H2,32,36)(H,33,35)/t22-,23-,24-,25-/m0/s1	UXOWGYHJODZGMF-QORCZRPOSA-N	2	0.00394516	0.0644577	0.064518	6.11481	Saar	HMP/VMP
Aliskiren	173334-57-1	pos	2006	R4	365	[M+H]+	InChI=1S/C30H53N3O6/c1-19(2)22(14-21-10-11-26(38-8)27(15-21)39-13-9-12-37-7)16-24(31)25(34)17-23(20(3)4)28(35)33-18-30(5,6)29(32)36/h10-11,15,19-20,22-25,34H,9,12-14,16-18,31H2,1-8H3,(H2,32,36)(H,33,35)/t22-,23-,24-,25-/m0/s1	UXOWGYHJODZGMF-QORCZRPOSA-N	3	0.00587929	0.123057	0.123151	4.77404	Rhine	HMP/VMP
Aliskiren	173334-57-1	pos	2006	R3	365	[M+H]+	InChI=1S/C30H53N3O6/c1-19(2)22(14-21-10-11-26(38-8)27(15-21)39-13-9-12-37-7)16-24(31)25(34)17-23(20(3)4)28(35)33-18-30(5,6)29(32)36/h10-11,15,19-20,22-25,34H,9,12-14,16-18,31H2,1-8H3,(H2,32,36)(H,33,35)/t22-,23-,24-,25-/m0/s1	UXOWGYHJODZGMF-QORCZRPOSA-N	3	0.0108118	0.119541	0.119865	9.02	Rhine	HMP/VMP
Aliskiren	173334-57-1	pos	2006	R1	365	[M+H]+	InChI=1S/C30H53N3O6/c1-19(2)22(14-21-10-11-26(38-8)27(15-21)39-13-9-12-37-7)16-24(31)25(34)17-23(20(3)4)28(35)33-18-30(5,6)29(32)36/h10-11,15,19-20,22-25,34H,9,12-14,16-18,31H2,1-8H3,(H2,32,36)(H,33,35)/t22-,23-,24-,25-/m0/s1	UXOWGYHJODZGMF-QORCZRPOSA-N	3	0.048626	0.142975	0.147938	32.8692	Rhine	HMP/VMP
Aliskiren	173334-57-1	pos	2007	R4	365	[M+H]+	InChI=1S/C30H53N3O6/c1-19(2)22(14-21-10-11-26(38-8)27(15-21)39-13-9-12-37-7)16-24(31)25(34)17-23(20(3)4)28(35)33-18-30(5,6)29(32)36/h10-11,15,19-20,22-25,34H,9,12-14,16-18,31H2,1-8H3,(H2,32,36)(H,33,35)/t22-,23-,24-,25-/m0/s1	UXOWGYHJODZGMF-QORCZRPOSA-N	3	0.0226939	0.496327	0.496669	4.56923	Rhine	HMP/VMP
Aliskiren	173334-57-1	pos	2007	R3	365	[M+H]+	InChI=1S/C30H53N3O6/c1-19(2)22(14-21-10-11-26(38-8)27(15-21)39-13-9-12-37-7)16-24(31)25(34)17-23(20(3)4)28(35)33-18-30(5,6)29(32)36/h10-11,15,19-20,22-25,34H,9,12-14,16-18,31H2,1-8H3,(H2,32,36)(H,33,35)/t22-,23-,24-,25-/m0/s1	UXOWGYHJODZGMF-QORCZRPOSA-N	3	0.0278642	0.451264	0.451848	6.16673	Rhine	HMP/VMP
Aliskiren	173334-57-1	pos	2007	R1	365	[M+H]+	InChI=1S/C30H53N3O6/c1-19(2)22(14-21-10-11-26(38-8)27(15-21)39-13-9-12-37-7)16-24(31)25(34)17-23(20(3)4)28(35)33-18-30(5,6)29(32)36/h10-11,15,19-20,22-25,34H,9,12-14,16-18,31H2,1-8H3,(H2,32,36)(H,33,35)/t22-,23-,24-,25-/m0/s1	UXOWGYHJODZGMF-QORCZRPOSA-N	3	0.0424147	0.54326	0.544395	7.79116	Rhine	HMP/VMP
Aliskiren	173334-57-1	pos	2008	E5	365	[M+H]+	InChI=1S/C30H53N3O6/c1-19(2)22(14-21-10-11-26(38-8)27(15-21)39-13-9-12-37-7)16-24(31)25(34)17-23(20(3)4)28(35)33-18-30(5,6)29(32)36/h10-11,15,19-20,22-25,34H,9,12-14,16-18,31H2,1-8H3,(H2,32,36)(H,33,35)/t22-,23-,24-,25-/m0/s1	UXOWGYHJODZGMF-QORCZRPOSA-N	3	0.0385573	0.695125	0.69585	5.54104	Elbe	HMP/VMP
Aliskiren	173334-57-1	pos	2008	E4	365	[M+H]+	InChI=1S/C30H53N3O6/c1-19(2)22(14-21-10-11-26(38-8)27(15-21)39-13-9-12-37-7)16-24(31)25(34)17-23(20(3)4)28(35)33-18-30(5,6)29(32)36/h10-11,15,19-20,22-25,34H,9,12-14,16-18,31H2,1-8H3,(H2,32,36)(H,33,35)/t22-,23-,24-,25-/m0/s1	UXOWGYHJODZGMF-QORCZRPOSA-N	3	0.0343675	0.351468	0.35259	9.74717	Elbe	HMP/VMP
Aliskiren	173334-57-1	pos	2008	E2	365	[M+H]+	InChI=1S/C30H53N3O6/c1-19(2)22(14-21-10-11-26(38-8)27(15-21)39-13-9-12-37-7)16-24(31)25(34)17-23(20(3)4)28(35)33-18-30(5,6)29(32)36/h10-11,15,19-20,22-25,34H,9,12-14,16-18,31H2,1-8H3,(H2,32,36)(H,33,35)/t22-,23-,24-,25-/m0/s1	UXOWGYHJODZGMF-QORCZRPOSA-N	3	0.0447117	0.224868	0.227752	19.6318	Elbe	HMP/VMP
Aliskiren	173334-57-1	pos	2008	Mu	365	[M+H]+	InChI=1S/C30H53N3O6/c1-19(2)22(14-21-10-11-26(38-8)27(15-21)39-13-9-12-37-7)16-24(31)25(34)17-23(20(3)4)28(35)33-18-30(5,6)29(32)36/h10-11,15,19-20,22-25,34H,9,12-14,16-18,31H2,1-8H3,(H2,32,36)(H,33,35)/t22-,23-,24-,25-/m0/s1	UXOWGYHJODZGMF-QORCZRPOSA-N	3	0.0919074	0.405842	0.412817	22.2635	Mulde	HMP/VMP
Aliskiren	173334-57-1	pos	2008	R4	365	[M+H]+	InChI=1S/C30H53N3O6/c1-19(2)22(14-21-10-11-26(38-8)27(15-21)39-13-9-12-37-7)16-24(31)25(34)17-23(20(3)4)28(35)33-18-30(5,6)29(32)36/h10-11,15,19-20,22-25,34H,9,12-14,16-18,31H2,1-8H3,(H2,32,36)(H,33,35)/t22-,23-,24-,25-/m0/s1	UXOWGYHJODZGMF-QORCZRPOSA-N	3	0.00700332	0.54018	0.54021	1.29641	Rhine	HMP/VMP
Aliskiren	173334-57-1	pos	2008	R3	365	[M+H]+	InChI=1S/C30H53N3O6/c1-19(2)22(14-21-10-11-26(38-8)27(15-21)39-13-9-12-37-7)16-24(31)25(34)17-23(20(3)4)28(35)33-18-30(5,6)29(32)36/h10-11,15,19-20,22-25,34H,9,12-14,16-18,31H2,1-8H3,(H2,32,36)(H,33,35)/t22-,23-,24-,25-/m0/s1	UXOWGYHJODZGMF-QORCZRPOSA-N	3	0.0248932	0.535021	0.535414	4.64934	Rhine	HMP/VMP
Aliskiren	173334-57-1	pos	2008	R1	365	[M+H]+	InChI=1S/C30H53N3O6/c1-19(2)22(14-21-10-11-26(38-8)27(15-21)39-13-9-12-37-7)16-24(31)25(34)17-23(20(3)4)28(35)33-18-30(5,6)29(32)36/h10-11,15,19-20,22-25,34H,9,12-14,16-18,31H2,1-8H3,(H2,32,36)(H,33,35)/t22-,23-,24-,25-/m0/s1	UXOWGYHJODZGMF-QORCZRPOSA-N	3	0.0123625	0.47145	0.471557	2.62163	Rhine	HMP/VMP
Aliskiren	173334-57-1	pos	2008	Sa	365	[M+H]+	InChI=1S/C30H53N3O6/c1-19(2)22(14-21-10-11-26(38-8)27(15-21)39-13-9-12-37-7)16-24(31)25(34)17-23(20(3)4)28(35)33-18-30(5,6)29(32)36/h10-11,15,19-20,22-25,34H,9,12-14,16-18,31H2,1-8H3,(H2,32,36)(H,33,35)/t22-,23-,24-,25-/m0/s1	UXOWGYHJODZGMF-QORCZRPOSA-N	3	0.166408	0.766699	0.779569	21.3462	Saale	HMP/VMP
Aliskiren	173334-57-1	pos	2008	S1	365	[M+H]+	InChI=1S/C30H53N3O6/c1-19(2)22(14-21-10-11-26(38-8)27(15-21)39-13-9-12-37-7)16-24(31)25(34)17-23(20(3)4)28(35)33-18-30(5,6)29(32)36/h10-11,15,19-20,22-25,34H,9,12-14,16-18,31H2,1-8H3,(H2,32,36)(H,33,35)/t22-,23-,24-,25-/m0/s1	UXOWGYHJODZGMF-QORCZRPOSA-N	3	0.0814672	0.250529	0.26015	31.3154	Saar	HMP/VMP
Aliskiren	173334-57-1	pos	2008	S2	365	[M+H]+	InChI=1S/C30H53N3O6/c1-19(2)22(14-21-10-11-26(38-8)27(15-21)39-13-9-12-37-7)16-24(31)25(34)17-23(20(3)4)28(35)33-18-30(5,6)29(32)36/h10-11,15,19-20,22-25,34H,9,12-14,16-18,31H2,1-8H3,(H2,32,36)(H,33,35)/t22-,23-,24-,25-/m0/s1	UXOWGYHJODZGMF-QORCZRPOSA-N	3	0.0523519	0.350851	0.353407	14.8135	Saar	HMP/VMP
Aliskiren	173334-57-1	pos	2009	D3	365	[M+H]+	InChI=1S/C30H53N3O6/c1-19(2)22(14-21-10-11-26(38-8)27(15-21)39-13-9-12-37-7)16-24(31)25(34)17-23(20(3)4)28(35)33-18-30(5,6)29(32)36/h10-11,15,19-20,22-25,34H,9,12-14,16-18,31H2,1-8H3,(H2,32,36)(H,33,35)/t22-,23-,24-,25-/m0/s1	UXOWGYHJODZGMF-QORCZRPOSA-N	2	0.00276886	0.140066	0.140079	1.97663	Danube	HMP/VMP
Aliskiren	173334-57-1	pos	2009	D1	365	[M+H]+	InChI=1S/C30H53N3O6/c1-19(2)22(14-21-10-11-26(38-8)27(15-21)39-13-9-12-37-7)16-24(31)25(34)17-23(20(3)4)28(35)33-18-30(5,6)29(32)36/h10-11,15,19-20,22-25,34H,9,12-14,16-18,31H2,1-8H3,(H2,32,36)(H,33,35)/t22-,23-,24-,25-/m0/s1	UXOWGYHJODZGMF-QORCZRPOSA-N	3	0.100779	0.433414	0.440573	22.8745	Danube	HMP/VMP
Aliskiren	173334-57-1	pos	2009	E5	365	[M+H]+	InChI=1S/C30H53N3O6/c1-19(2)22(14-21-10-11-26(38-8)27(15-21)39-13-9-12-37-7)16-24(31)25(34)17-23(20(3)4)28(35)33-18-30(5,6)29(32)36/h10-11,15,19-20,22-25,34H,9,12-14,16-18,31H2,1-8H3,(H2,32,36)(H,33,35)/t22-,23-,24-,25-/m0/s1	UXOWGYHJODZGMF-QORCZRPOSA-N	3	0.174505	2.26311	2.26761	7.69556	Elbe	HMP/VMP
Aliskiren	173334-57-1	pos	2009	E4	365	[M+H]+	InChI=1S/C30H53N3O6/c1-19(2)22(14-21-10-11-26(38-8)27(15-21)39-13-9-12-37-7)16-24(31)25(34)17-23(20(3)4)28(35)33-18-30(5,6)29(32)36/h10-11,15,19-20,22-25,34H,9,12-14,16-18,31H2,1-8H3,(H2,32,36)(H,33,35)/t22-,23-,24-,25-/m0/s1	UXOWGYHJODZGMF-QORCZRPOSA-N	3	0.0761023	1.28627	1.28779	5.90953	Elbe	HMP/VMP
Aliskiren	173334-57-1	pos	2009	E2	365	[M+H]+	InChI=1S/C30H53N3O6/c1-19(2)22(14-21-10-11-26(38-8)27(15-21)39-13-9-12-37-7)16-24(31)25(34)17-23(20(3)4)28(35)33-18-30(5,6)29(32)36/h10-11,15,19-20,22-25,34H,9,12-14,16-18,31H2,1-8H3,(H2,32,36)(H,33,35)/t22-,23-,24-,25-/m0/s1	UXOWGYHJODZGMF-QORCZRPOSA-N	3	0.110476	0.651648	0.657609	16.7996	Elbe	HMP/VMP
Aliskiren	173334-57-1	pos	2009	Mu	365	[M+H]+	InChI=1S/C30H53N3O6/c1-19(2)22(14-21-10-11-26(38-8)27(15-21)39-13-9-12-37-7)16-24(31)25(34)17-23(20(3)4)28(35)33-18-30(5,6)29(32)36/h10-11,15,19-20,22-25,34H,9,12-14,16-18,31H2,1-8H3,(H2,32,36)(H,33,35)/t22-,23-,24-,25-/m0/s1	UXOWGYHJODZGMF-QORCZRPOSA-N	3	0.892199	2.15895	2.26473	39.3953	Mulde	HMP/VMP
Aliskiren	173334-57-1	pos	2009	R4	365	[M+H]+	InChI=1S/C30H53N3O6/c1-19(2)22(14-21-10-11-26(38-8)27(15-21)39-13-9-12-37-7)16-24(31)25(34)17-23(20(3)4)28(35)33-18-30(5,6)29(32)36/h10-11,15,19-20,22-25,34H,9,12-14,16-18,31H2,1-8H3,(H2,32,36)(H,33,35)/t22-,23-,24-,25-/m0/s1	UXOWGYHJODZGMF-QORCZRPOSA-N	3	0.0367883	1.04878	1.04921	3.50628	Rhine	HMP/VMP
Aliskiren	173334-57-1	pos	2009	R3	365	[M+H]+	InChI=1S/C30H53N3O6/c1-19(2)22(14-21-10-11-26(38-8)27(15-21)39-13-9-12-37-7)16-24(31)25(34)17-23(20(3)4)28(35)33-18-30(5,6)29(32)36/h10-11,15,19-20,22-25,34H,9,12-14,16-18,31H2,1-8H3,(H2,32,36)(H,33,35)/t22-,23-,24-,25-/m0/s1	UXOWGYHJODZGMF-QORCZRPOSA-N	3	0.0440828	1.08746	1.08805	4.05155	Rhine	HMP/VMP
Aliskiren	173334-57-1	pos	2009	R1	365	[M+H]+	InChI=1S/C30H53N3O6/c1-19(2)22(14-21-10-11-26(38-8)27(15-21)39-13-9-12-37-7)16-24(31)25(34)17-23(20(3)4)28(35)33-18-30(5,6)29(32)36/h10-11,15,19-20,22-25,34H,9,12-14,16-18,31H2,1-8H3,(H2,32,36)(H,33,35)/t22-,23-,24-,25-/m0/s1	UXOWGYHJODZGMF-QORCZRPOSA-N	3	0.0150053	0.8702	0.870287	1.72418	Rhine	HMP/VMP
Aliskiren	173334-57-1	pos	2009	Sa	365	[M+H]+	InChI=1S/C30H53N3O6/c1-19(2)22(14-21-10-11-26(38-8)27(15-21)39-13-9-12-37-7)16-24(31)25(34)17-23(20(3)4)28(35)33-18-30(5,6)29(32)36/h10-11,15,19-20,22-25,34H,9,12-14,16-18,31H2,1-8H3,(H2,32,36)(H,33,35)/t22-,23-,24-,25-/m0/s1	UXOWGYHJODZGMF-QORCZRPOSA-N	3	1.17361	4.40928	4.51558	25.9902	Saale	HMP/VMP
Aliskiren	173334-57-1	pos	2009	S1	365	[M+H]+	InChI=1S/C30H53N3O6/c1-19(2)22(14-21-10-11-26(38-8)27(15-21)39-13-9-12-37-7)16-24(31)25(34)17-23(20(3)4)28(35)33-18-30(5,6)29(32)36/h10-11,15,19-20,22-25,34H,9,12-14,16-18,31H2,1-8H3,(H2,32,36)(H,33,35)/t22-,23-,24-,25-/m0/s1	UXOWGYHJODZGMF-QORCZRPOSA-N	3	0.857297	1.71417	1.8675	45.9062	Saar	HMP/VMP
Aliskiren	173334-57-1	pos	2009	S2	365	[M+H]+	InChI=1S/C30H53N3O6/c1-19(2)22(14-21-10-11-26(38-8)27(15-21)39-13-9-12-37-7)16-24(31)25(34)17-23(20(3)4)28(35)33-18-30(5,6)29(32)36/h10-11,15,19-20,22-25,34H,9,12-14,16-18,31H2,1-8H3,(H2,32,36)(H,33,35)/t22-,23-,24-,25-/m0/s1	UXOWGYHJODZGMF-QORCZRPOSA-N	3	0.0774529	1.26533	1.2669	6.11359	Saar	HMP/VMP
Aliskiren	173334-57-1	pos	2010	D3	365	[M+H]+	InChI=1S/C30H53N3O6/c1-19(2)22(14-21-10-11-26(38-8)27(15-21)39-13-9-12-37-7)16-24(31)25(34)17-23(20(3)4)28(35)33-18-30(5,6)29(32)36/h10-11,15,19-20,22-25,34H,9,12-14,16-18,31H2,1-8H3,(H2,32,36)(H,33,35)/t22-,23-,24-,25-/m0/s1	UXOWGYHJODZGMF-QORCZRPOSA-N	2	0.0320331	0.28414	0.285041	11.238	Danube	HMP/VMP
Aliskiren	173334-57-1	pos	2010	D1	365	[M+H]+	InChI=1S/C30H53N3O6/c1-19(2)22(14-21-10-11-26(38-8)27(15-21)39-13-9-12-37-7)16-24(31)25(34)17-23(20(3)4)28(35)33-18-30(5,6)29(32)36/h10-11,15,19-20,22-25,34H,9,12-14,16-18,31H2,1-8H3,(H2,32,36)(H,33,35)/t22-,23-,24-,25-/m0/s1	UXOWGYHJODZGMF-QORCZRPOSA-N	3	0.136638	0.577702	0.588328	23.2248	Danube	HMP/VMP
Aliskiren	173334-57-1	pos	2010	E5	365	[M+H]+	InChI=1S/C30H53N3O6/c1-19(2)22(14-21-10-11-26(38-8)27(15-21)39-13-9-12-37-7)16-24(31)25(34)17-23(20(3)4)28(35)33-18-30(5,6)29(32)36/h10-11,15,19-20,22-25,34H,9,12-14,16-18,31H2,1-8H3,(H2,32,36)(H,33,35)/t22-,23-,24-,25-/m0/s1	UXOWGYHJODZGMF-QORCZRPOSA-N	3	0.133782	2.51877	2.52111	5.30647	Elbe	HMP/VMP
Aliskiren	173334-57-1	pos	2010	E4	365	[M+H]+	InChI=1S/C30H53N3O6/c1-19(2)22(14-21-10-11-26(38-8)27(15-21)39-13-9-12-37-7)16-24(31)25(34)17-23(20(3)4)28(35)33-18-30(5,6)29(32)36/h10-11,15,19-20,22-25,34H,9,12-14,16-18,31H2,1-8H3,(H2,32,36)(H,33,35)/t22-,23-,24-,25-/m0/s1	UXOWGYHJODZGMF-QORCZRPOSA-N	3	0.546554	1.67356	1.73651	31.4743	Elbe	HMP/VMP
Aliskiren	173334-57-1	pos	2010	E2	365	[M+H]+	InChI=1S/C30H53N3O6/c1-19(2)22(14-21-10-11-26(38-8)27(15-21)39-13-9-12-37-7)16-24(31)25(34)17-23(20(3)4)28(35)33-18-30(5,6)29(32)36/h10-11,15,19-20,22-25,34H,9,12-14,16-18,31H2,1-8H3,(H2,32,36)(H,33,35)/t22-,23-,24-,25-/m0/s1	UXOWGYHJODZGMF-QORCZRPOSA-N	3	0.112776	0.925599	0.929966	12.1269	Elbe	HMP/VMP
Aliskiren	173334-57-1	pos	2010	Mu	365	[M+H]+	InChI=1S/C30H53N3O6/c1-19(2)22(14-21-10-11-26(38-8)27(15-21)39-13-9-12-37-7)16-24(31)25(34)17-23(20(3)4)28(35)33-18-30(5,6)29(32)36/h10-11,15,19-20,22-25,34H,9,12-14,16-18,31H2,1-8H3,(H2,32,36)(H,33,35)/t22-,23-,24-,25-/m0/s1	UXOWGYHJODZGMF-QORCZRPOSA-N	3	1.41567	3.52701	3.72471	38.0075	Mulde	HMP/VMP
Aliskiren	173334-57-1	pos	2010	R4	365	[M+H]+	InChI=1S/C30H53N3O6/c1-19(2)22(14-21-10-11-26(38-8)27(15-21)39-13-9-12-37-7)16-24(31)25(34)17-23(20(3)4)28(35)33-18-30(5,6)29(32)36/h10-11,15,19-20,22-25,34H,9,12-14,16-18,31H2,1-8H3,(H2,32,36)(H,33,35)/t22-,23-,24-,25-/m0/s1	UXOWGYHJODZGMF-QORCZRPOSA-N	3	0.0164067	1.90035	1.90039	0.863334	Rhine	HMP/VMP
Aliskiren	173334-57-1	pos	2010	R3	365	[M+H]+	InChI=1S/C30H53N3O6/c1-19(2)22(14-21-10-11-26(38-8)27(15-21)39-13-9-12-37-7)16-24(31)25(34)17-23(20(3)4)28(35)33-18-30(5,6)29(32)36/h10-11,15,19-20,22-25,34H,9,12-14,16-18,31H2,1-8H3,(H2,32,36)(H,33,35)/t22-,23-,24-,25-/m0/s1	UXOWGYHJODZGMF-QORCZRPOSA-N	3	0.157183	2.02676	2.03075	7.74016	Rhine	HMP/VMP
Aliskiren	173334-57-1	pos	2010	R1	365	[M+H]+	InChI=1S/C30H53N3O6/c1-19(2)22(14-21-10-11-26(38-8)27(15-21)39-13-9-12-37-7)16-24(31)25(34)17-23(20(3)4)28(35)33-18-30(5,6)29(32)36/h10-11,15,19-20,22-25,34H,9,12-14,16-18,31H2,1-8H3,(H2,32,36)(H,33,35)/t22-,23-,24-,25-/m0/s1	UXOWGYHJODZGMF-QORCZRPOSA-N	3	0.065505	1.10298	1.1043	5.93181	Rhine	HMP/VMP
Aliskiren	173334-57-1	pos	2010	Sa	365	[M+H]+	InChI=1S/C30H53N3O6/c1-19(2)22(14-21-10-11-26(38-8)27(15-21)39-13-9-12-37-7)16-24(31)25(34)17-23(20(3)4)28(35)33-18-30(5,6)29(32)36/h10-11,15,19-20,22-25,34H,9,12-14,16-18,31H2,1-8H3,(H2,32,36)(H,33,35)/t22-,23-,24-,25-/m0/s1	UXOWGYHJODZGMF-QORCZRPOSA-N	3	1.70666	6.29132	6.46097	26.4149	Saale	HMP/VMP
Aliskiren	173334-57-1	pos	2010	S1	365	[M+H]+	InChI=1S/C30H53N3O6/c1-19(2)22(14-21-10-11-26(38-8)27(15-21)39-13-9-12-37-7)16-24(31)25(34)17-23(20(3)4)28(35)33-18-30(5,6)29(32)36/h10-11,15,19-20,22-25,34H,9,12-14,16-18,31H2,1-8H3,(H2,32,36)(H,33,35)/t22-,23-,24-,25-/m0/s1	UXOWGYHJODZGMF-QORCZRPOSA-N	3	0.638794	2.75718	2.80992	22.7336	Saar	HMP/VMP
Aliskiren	173334-57-1	pos	2010	S2	365	[M+H]+	InChI=1S/C30H53N3O6/c1-19(2)22(14-21-10-11-26(38-8)27(15-21)39-13-9-12-37-7)16-24(31)25(34)17-23(20(3)4)28(35)33-18-30(5,6)29(32)36/h10-11,15,19-20,22-25,34H,9,12-14,16-18,31H2,1-8H3,(H2,32,36)(H,33,35)/t22-,23-,24-,25-/m0/s1	UXOWGYHJODZGMF-QORCZRPOSA-N	3	0.270472	2.29936	2.30971	11.7103	Saar	HMP/VMP
Aliskiren	173334-57-1	pos	2011	D3	365	[M+H]+	InChI=1S/C30H53N3O6/c1-19(2)22(14-21-10-11-26(38-8)27(15-21)39-13-9-12-37-7)16-24(31)25(34)17-23(20(3)4)28(35)33-18-30(5,6)29(32)36/h10-11,15,19-20,22-25,34H,9,12-14,16-18,31H2,1-8H3,(H2,32,36)(H,33,35)/t22-,23-,24-,25-/m0/s1	UXOWGYHJODZGMF-QORCZRPOSA-N	2	0.0898152	0.323713	0.329884	27.2263	Danube	HMP/VMP
Aliskiren	173334-57-1	pos	2011	D1	365	[M+H]+	InChI=1S/C30H53N3O6/c1-19(2)22(14-21-10-11-26(38-8)27(15-21)39-13-9-12-37-7)16-24(31)25(34)17-23(20(3)4)28(35)33-18-30(5,6)29(32)36/h10-11,15,19-20,22-25,34H,9,12-14,16-18,31H2,1-8H3,(H2,32,36)(H,33,35)/t22-,23-,24-,25-/m0/s1	UXOWGYHJODZGMF-QORCZRPOSA-N	3	0.27268	0.895267	0.922972	29.5436	Danube	HMP/VMP
Aliskiren	173334-57-1	pos	2011	E5	365	[M+H]+	InChI=1S/C30H53N3O6/c1-19(2)22(14-21-10-11-26(38-8)27(15-21)39-13-9-12-37-7)16-24(31)25(34)17-23(20(3)4)28(35)33-18-30(5,6)29(32)36/h10-11,15,19-20,22-25,34H,9,12-14,16-18,31H2,1-8H3,(H2,32,36)(H,33,35)/t22-,23-,24-,25-/m0/s1	UXOWGYHJODZGMF-QORCZRPOSA-N	3	0.047549	4.09886	4.09904	1.16	Elbe	HMP/VMP
Aliskiren	173334-57-1	pos	2011	E4	365	[M+H]+	InChI=1S/C30H53N3O6/c1-19(2)22(14-21-10-11-26(38-8)27(15-21)39-13-9-12-37-7)16-24(31)25(34)17-23(20(3)4)28(35)33-18-30(5,6)29(32)36/h10-11,15,19-20,22-25,34H,9,12-14,16-18,31H2,1-8H3,(H2,32,36)(H,33,35)/t22-,23-,24-,25-/m0/s1	UXOWGYHJODZGMF-QORCZRPOSA-N	3	0.403898	1.56307	1.59863	25.2653	Elbe	HMP/VMP
Aliskiren	173334-57-1	pos	2011	E2	365	[M+H]+	InChI=1S/C30H53N3O6/c1-19(2)22(14-21-10-11-26(38-8)27(15-21)39-13-9-12-37-7)16-24(31)25(34)17-23(20(3)4)28(35)33-18-30(5,6)29(32)36/h10-11,15,19-20,22-25,34H,9,12-14,16-18,31H2,1-8H3,(H2,32,36)(H,33,35)/t22-,23-,24-,25-/m0/s1	UXOWGYHJODZGMF-QORCZRPOSA-N	3	0.131555	1.39054	1.39477	9.43203	Elbe	HMP/VMP
Aliskiren	173334-57-1	pos	2011	Mu	365	[M+H]+	InChI=1S/C30H53N3O6/c1-19(2)22(14-21-10-11-26(38-8)27(15-21)39-13-9-12-37-7)16-24(31)25(34)17-23(20(3)4)28(35)33-18-30(5,6)29(32)36/h10-11,15,19-20,22-25,34H,9,12-14,16-18,31H2,1-8H3,(H2,32,36)(H,33,35)/t22-,23-,24-,25-/m0/s1	UXOWGYHJODZGMF-QORCZRPOSA-N	3	3.11701	2.89028	4.16129	74.905	Mulde	HMP/VMP
Aliskiren	173334-57-1	pos	2011	R4	365	[M+H]+	InChI=1S/C30H53N3O6/c1-19(2)22(14-21-10-11-26(38-8)27(15-21)39-13-9-12-37-7)16-24(31)25(34)17-23(20(3)4)28(35)33-18-30(5,6)29(32)36/h10-11,15,19-20,22-25,34H,9,12-14,16-18,31H2,1-8H3,(H2,32,36)(H,33,35)/t22-,23-,24-,25-/m0/s1	UXOWGYHJODZGMF-QORCZRPOSA-N	3	0.0727295	1.87048	1.87141	3.88635	Rhine	HMP/VMP
Aliskiren	173334-57-1	pos	2011	R3	365	[M+H]+	InChI=1S/C30H53N3O6/c1-19(2)22(14-21-10-11-26(38-8)27(15-21)39-13-9-12-37-7)16-24(31)25(34)17-23(20(3)4)28(35)33-18-30(5,6)29(32)36/h10-11,15,19-20,22-25,34H,9,12-14,16-18,31H2,1-8H3,(H2,32,36)(H,33,35)/t22-,23-,24-,25-/m0/s1	UXOWGYHJODZGMF-QORCZRPOSA-N	3	0.0719728	2.42611	2.42682	2.96572	Rhine	HMP/VMP
Aliskiren	173334-57-1	pos	2011	R1	365	[M+H]+	InChI=1S/C30H53N3O6/c1-19(2)22(14-21-10-11-26(38-8)27(15-21)39-13-9-12-37-7)16-24(31)25(34)17-23(20(3)4)28(35)33-18-30(5,6)29(32)36/h10-11,15,19-20,22-25,34H,9,12-14,16-18,31H2,1-8H3,(H2,32,36)(H,33,35)/t22-,23-,24-,25-/m0/s1	UXOWGYHJODZGMF-QORCZRPOSA-N	3	0.0818062	1.89268	1.89384	4.3196	Rhine	HMP/VMP
Aliskiren	173334-57-1	pos	2011	Sa	365	[M+H]+	InChI=1S/C30H53N3O6/c1-19(2)22(14-21-10-11-26(38-8)27(15-21)39-13-9-12-37-7)16-24(31)25(34)17-23(20(3)4)28(35)33-18-30(5,6)29(32)36/h10-11,15,19-20,22-25,34H,9,12-14,16-18,31H2,1-8H3,(H2,32,36)(H,33,35)/t22-,23-,24-,25-/m0/s1	UXOWGYHJODZGMF-QORCZRPOSA-N	3	4.0979	11.3977	11.9496	34.2933	Saale	HMP/VMP
Aliskiren	173334-57-1	pos	2011	S1	365	[M+H]+	InChI=1S/C30H53N3O6/c1-19(2)22(14-21-10-11-26(38-8)27(15-21)39-13-9-12-37-7)16-24(31)25(34)17-23(20(3)4)28(35)33-18-30(5,6)29(32)36/h10-11,15,19-20,22-25,34H,9,12-14,16-18,31H2,1-8H3,(H2,32,36)(H,33,35)/t22-,23-,24-,25-/m0/s1	UXOWGYHJODZGMF-QORCZRPOSA-N	3	1.63055	4.27011	4.46116	36.5501	Saar	HMP/VMP
Aliskiren	173334-57-1	pos	2011	S2	365	[M+H]+	InChI=1S/C30H53N3O6/c1-19(2)22(14-21-10-11-26(38-8)27(15-21)39-13-9-12-37-7)16-24(31)25(34)17-23(20(3)4)28(35)33-18-30(5,6)29(32)36/h10-11,15,19-20,22-25,34H,9,12-14,16-18,31H2,1-8H3,(H2,32,36)(H,33,35)/t22-,23-,24-,25-/m0/s1	UXOWGYHJODZGMF-QORCZRPOSA-N	3	0.0989202	4.30574	4.30651	2.29699	Saar	HMP/VMP
Aliskiren	173334-57-1	pos	2012	D3	365	[M+H]+	InChI=1S/C30H53N3O6/c1-19(2)22(14-21-10-11-26(38-8)27(15-21)39-13-9-12-37-7)16-24(31)25(34)17-23(20(3)4)28(35)33-18-30(5,6)29(32)36/h10-11,15,19-20,22-25,34H,9,12-14,16-18,31H2,1-8H3,(H2,32,36)(H,33,35)/t22-,23-,24-,25-/m0/s1	UXOWGYHJODZGMF-QORCZRPOSA-N	2	0.0748078	0.37796	0.381643	19.6015	Danube	HMP/VMP
Aliskiren	173334-57-1	pos	2012	D1	365	[M+H]+	InChI=1S/C30H53N3O6/c1-19(2)22(14-21-10-11-26(38-8)27(15-21)39-13-9-12-37-7)16-24(31)25(34)17-23(20(3)4)28(35)33-18-30(5,6)29(32)36/h10-11,15,19-20,22-25,34H,9,12-14,16-18,31H2,1-8H3,(H2,32,36)(H,33,35)/t22-,23-,24-,25-/m0/s1	UXOWGYHJODZGMF-QORCZRPOSA-N	3	0.305844	0.926839	0.964463	31.7114	Danube	HMP/VMP
Aliskiren	173334-57-1	pos	2012	E5	365	[M+H]+	InChI=1S/C30H53N3O6/c1-19(2)22(14-21-10-11-26(38-8)27(15-21)39-13-9-12-37-7)16-24(31)25(34)17-23(20(3)4)28(35)33-18-30(5,6)29(32)36/h10-11,15,19-20,22-25,34H,9,12-14,16-18,31H2,1-8H3,(H2,32,36)(H,33,35)/t22-,23-,24-,25-/m0/s1	UXOWGYHJODZGMF-QORCZRPOSA-N	3	0.162282	5.12635	5.12809	3.16457	Elbe	HMP/VMP
Aliskiren	173334-57-1	pos	2012	E4	365	[M+H]+	InChI=1S/C30H53N3O6/c1-19(2)22(14-21-10-11-26(38-8)27(15-21)39-13-9-12-37-7)16-24(31)25(34)17-23(20(3)4)28(35)33-18-30(5,6)29(32)36/h10-11,15,19-20,22-25,34H,9,12-14,16-18,31H2,1-8H3,(H2,32,36)(H,33,35)/t22-,23-,24-,25-/m0/s1	UXOWGYHJODZGMF-QORCZRPOSA-N	3	0.448829	1.60236	1.64854	27.2258	Elbe	HMP/VMP
Aliskiren	173334-57-1	pos	2012	E2	365	[M+H]+	InChI=1S/C30H53N3O6/c1-19(2)22(14-21-10-11-26(38-8)27(15-21)39-13-9-12-37-7)16-24(31)25(34)17-23(20(3)4)28(35)33-18-30(5,6)29(32)36/h10-11,15,19-20,22-25,34H,9,12-14,16-18,31H2,1-8H3,(H2,32,36)(H,33,35)/t22-,23-,24-,25-/m0/s1	UXOWGYHJODZGMF-QORCZRPOSA-N	3	0.298171	1.68583	1.70257	17.5131	Elbe	HMP/VMP
Aliskiren	173334-57-1	pos	2012	Mu	365	[M+H]+	InChI=1S/C30H53N3O6/c1-19(2)22(14-21-10-11-26(38-8)27(15-21)39-13-9-12-37-7)16-24(31)25(34)17-23(20(3)4)28(35)33-18-30(5,6)29(32)36/h10-11,15,19-20,22-25,34H,9,12-14,16-18,31H2,1-8H3,(H2,32,36)(H,33,35)/t22-,23-,24-,25-/m0/s1	UXOWGYHJODZGMF-QORCZRPOSA-N	3	2.79325	6.18242	6.66989	41.8784	Mulde	HMP/VMP
Aliskiren	173334-57-1	pos	2012	R4	365	[M+H]+	InChI=1S/C30H53N3O6/c1-19(2)22(14-21-10-11-26(38-8)27(15-21)39-13-9-12-37-7)16-24(31)25(34)17-23(20(3)4)28(35)33-18-30(5,6)29(32)36/h10-11,15,19-20,22-25,34H,9,12-14,16-18,31H2,1-8H3,(H2,32,36)(H,33,35)/t22-,23-,24-,25-/m0/s1	UXOWGYHJODZGMF-QORCZRPOSA-N	3	0.0146912	2.04544	2.04548	0.718227	Rhine	HMP/VMP
Aliskiren	173334-57-1	pos	2012	R3	365	[M+H]+	InChI=1S/C30H53N3O6/c1-19(2)22(14-21-10-11-26(38-8)27(15-21)39-13-9-12-37-7)16-24(31)25(34)17-23(20(3)4)28(35)33-18-30(5,6)29(32)36/h10-11,15,19-20,22-25,34H,9,12-14,16-18,31H2,1-8H3,(H2,32,36)(H,33,35)/t22-,23-,24-,25-/m0/s1	UXOWGYHJODZGMF-QORCZRPOSA-N	3	0.312842	2.28641	2.30101	13.5959	Rhine	HMP/VMP
Aliskiren	173334-57-1	pos	2012	R1	365	[M+H]+	InChI=1S/C30H53N3O6/c1-19(2)22(14-21-10-11-26(38-8)27(15-21)39-13-9-12-37-7)16-24(31)25(34)17-23(20(3)4)28(35)33-18-30(5,6)29(32)36/h10-11,15,19-20,22-25,34H,9,12-14,16-18,31H2,1-8H3,(H2,32,36)(H,33,35)/t22-,23-,24-,25-/m0/s1	UXOWGYHJODZGMF-QORCZRPOSA-N	3	0.0160558	0.821724	0.821828	1.95367	Rhine	HMP/VMP
Aliskiren	173334-57-1	pos	2012	Sa	365	[M+H]+	InChI=1S/C30H53N3O6/c1-19(2)22(14-21-10-11-26(38-8)27(15-21)39-13-9-12-37-7)16-24(31)25(34)17-23(20(3)4)28(35)33-18-30(5,6)29(32)36/h10-11,15,19-20,22-25,34H,9,12-14,16-18,31H2,1-8H3,(H2,32,36)(H,33,35)/t22-,23-,24-,25-/m0/s1	UXOWGYHJODZGMF-QORCZRPOSA-N	3	3.08351	10.2668	10.6078	29.0682	Saale	HMP/VMP
Aliskiren	173334-57-1	pos	2012	S1	365	[M+H]+	InChI=1S/C30H53N3O6/c1-19(2)22(14-21-10-11-26(38-8)27(15-21)39-13-9-12-37-7)16-24(31)25(34)17-23(20(3)4)28(35)33-18-30(5,6)29(32)36/h10-11,15,19-20,22-25,34H,9,12-14,16-18,31H2,1-8H3,(H2,32,36)(H,33,35)/t22-,23-,24-,25-/m0/s1	UXOWGYHJODZGMF-QORCZRPOSA-N	3	1.79849	4.37271	4.64312	38.7344	Saar	HMP/VMP
Aliskiren	173334-57-1	pos	2012	S2	365	[M+H]+	InChI=1S/C30H53N3O6/c1-19(2)22(14-21-10-11-26(38-8)27(15-21)39-13-9-12-37-7)16-24(31)25(34)17-23(20(3)4)28(35)33-18-30(5,6)29(32)36/h10-11,15,19-20,22-25,34H,9,12-14,16-18,31H2,1-8H3,(H2,32,36)(H,33,35)/t22-,23-,24-,25-/m0/s1	UXOWGYHJODZGMF-QORCZRPOSA-N	3	0.55117	8.02827	8.0411	6.85441	Saar	HMP/VMP
Aliskiren	173334-57-1	pos	2013	D1	365	[M+H]+	InChI=1S/C30H53N3O6/c1-19(2)22(14-21-10-11-26(38-8)27(15-21)39-13-9-12-37-7)16-24(31)25(34)17-23(20(3)4)28(35)33-18-30(5,6)29(32)36/h10-11,15,19-20,22-25,34H,9,12-14,16-18,31H2,1-8H3,(H2,32,36)(H,33,35)/t22-,23-,24-,25-/m0/s1	UXOWGYHJODZGMF-QORCZRPOSA-N	3	0.146329	0.550996	0.564868	25.905	Danube	HMP/VMP
Aliskiren	173334-57-1	pos	2013	E5	365	[M+H]+	InChI=1S/C30H53N3O6/c1-19(2)22(14-21-10-11-26(38-8)27(15-21)39-13-9-12-37-7)16-24(31)25(34)17-23(20(3)4)28(35)33-18-30(5,6)29(32)36/h10-11,15,19-20,22-25,34H,9,12-14,16-18,31H2,1-8H3,(H2,32,36)(H,33,35)/t22-,23-,24-,25-/m0/s1	UXOWGYHJODZGMF-QORCZRPOSA-N	3	0.116494	1.39987	1.40304	8.30299	Elbe	HMP/VMP
Aliskiren	173334-57-1	pos	2013	E4	365	[M+H]+	InChI=1S/C30H53N3O6/c1-19(2)22(14-21-10-11-26(38-8)27(15-21)39-13-9-12-37-7)16-24(31)25(34)17-23(20(3)4)28(35)33-18-30(5,6)29(32)36/h10-11,15,19-20,22-25,34H,9,12-14,16-18,31H2,1-8H3,(H2,32,36)(H,33,35)/t22-,23-,24-,25-/m0/s1	UXOWGYHJODZGMF-QORCZRPOSA-N	3	0.297509	1.46071	1.47936	20.1106	Elbe	HMP/VMP
Aliskiren	173334-57-1	pos	2013	Mu	365	[M+H]+	InChI=1S/C30H53N3O6/c1-19(2)22(14-21-10-11-26(38-8)27(15-21)39-13-9-12-37-7)16-24(31)25(34)17-23(20(3)4)28(35)33-18-30(5,6)29(32)36/h10-11,15,19-20,22-25,34H,9,12-14,16-18,31H2,1-8H3,(H2,32,36)(H,33,35)/t22-,23-,24-,25-/m0/s1	UXOWGYHJODZGMF-QORCZRPOSA-N	3	0.151012	2.85359	2.85628	5.28703	Mulde	HMP/VMP
Aliskiren	173334-57-1	pos	2013	R4	365	[M+H]+	InChI=1S/C30H53N3O6/c1-19(2)22(14-21-10-11-26(38-8)27(15-21)39-13-9-12-37-7)16-24(31)25(34)17-23(20(3)4)28(35)33-18-30(5,6)29(32)36/h10-11,15,19-20,22-25,34H,9,12-14,16-18,31H2,1-8H3,(H2,32,36)(H,33,35)/t22-,23-,24-,25-/m0/s1	UXOWGYHJODZGMF-QORCZRPOSA-N	3	0.0388488	1.33208	1.33246	2.91557	Rhine	HMP/VMP
Aliskiren	173334-57-1	pos	2013	R3	365	[M+H]+	InChI=1S/C30H53N3O6/c1-19(2)22(14-21-10-11-26(38-8)27(15-21)39-13-9-12-37-7)16-24(31)25(34)17-23(20(3)4)28(35)33-18-30(5,6)29(32)36/h10-11,15,19-20,22-25,34H,9,12-14,16-18,31H2,1-8H3,(H2,32,36)(H,33,35)/t22-,23-,24-,25-/m0/s1	UXOWGYHJODZGMF-QORCZRPOSA-N	3	0.051797	1.16563	1.16639	4.44078	Rhine	HMP/VMP
Aliskiren	173334-57-1	pos	2013	R1	365	[M+H]+	InChI=1S/C30H53N3O6/c1-19(2)22(14-21-10-11-26(38-8)27(15-21)39-13-9-12-37-7)16-24(31)25(34)17-23(20(3)4)28(35)33-18-30(5,6)29(32)36/h10-11,15,19-20,22-25,34H,9,12-14,16-18,31H2,1-8H3,(H2,32,36)(H,33,35)/t22-,23-,24-,25-/m0/s1	UXOWGYHJODZGMF-QORCZRPOSA-N	3	0.0175848	0.495589	0.495799	3.54675	Rhine	HMP/VMP
Aliskiren	173334-57-1	pos	2013	Sa	365	[M+H]+	InChI=1S/C30H53N3O6/c1-19(2)22(14-21-10-11-26(38-8)27(15-21)39-13-9-12-37-7)16-24(31)25(34)17-23(20(3)4)28(35)33-18-30(5,6)29(32)36/h10-11,15,19-20,22-25,34H,9,12-14,16-18,31H2,1-8H3,(H2,32,36)(H,33,35)/t22-,23-,24-,25-/m0/s1	UXOWGYHJODZGMF-QORCZRPOSA-N	3	0.940779	6.14776	6.19503	15.186	Saale	HMP/VMP
Aliskiren	173334-57-1	pos	2013	S1	365	[M+H]+	InChI=1S/C30H53N3O6/c1-19(2)22(14-21-10-11-26(38-8)27(15-21)39-13-9-12-37-7)16-24(31)25(34)17-23(20(3)4)28(35)33-18-30(5,6)29(32)36/h10-11,15,19-20,22-25,34H,9,12-14,16-18,31H2,1-8H3,(H2,32,36)(H,33,35)/t22-,23-,24-,25-/m0/s1	UXOWGYHJODZGMF-QORCZRPOSA-N	3	0.757584	2.88036	2.95328	25.6523	Saar	HMP/VMP
Aliskiren	173334-57-1	pos	2013	S2	365	[M+H]+	InChI=1S/C30H53N3O6/c1-19(2)22(14-21-10-11-26(38-8)27(15-21)39-13-9-12-37-7)16-24(31)25(34)17-23(20(3)4)28(35)33-18-30(5,6)29(32)36/h10-11,15,19-20,22-25,34H,9,12-14,16-18,31H2,1-8H3,(H2,32,36)(H,33,35)/t22-,23-,24-,25-/m0/s1	UXOWGYHJODZGMF-QORCZRPOSA-N	3	0.243736	3.74733	3.75252	6.49526	Saar	HMP/VMP
Aliskiren	173334-57-1	pos	2014	D1	365	[M+H]+	InChI=1S/C30H53N3O6/c1-19(2)22(14-21-10-11-26(38-8)27(15-21)39-13-9-12-37-7)16-24(31)25(34)17-23(20(3)4)28(35)33-18-30(5,6)29(32)36/h10-11,15,19-20,22-25,34H,9,12-14,16-18,31H2,1-8H3,(H2,32,36)(H,33,35)/t22-,23-,24-,25-/m0/s1	UXOWGYHJODZGMF-QORCZRPOSA-N	3	0.172109	0.608826	0.626753	27.4604	Danube	HMP/VMP
Aliskiren	173334-57-1	pos	2014	E5	365	[M+H]+	InChI=1S/C30H53N3O6/c1-19(2)22(14-21-10-11-26(38-8)27(15-21)39-13-9-12-37-7)16-24(31)25(34)17-23(20(3)4)28(35)33-18-30(5,6)29(32)36/h10-11,15,19-20,22-25,34H,9,12-14,16-18,31H2,1-8H3,(H2,32,36)(H,33,35)/t22-,23-,24-,25-/m0/s1	UXOWGYHJODZGMF-QORCZRPOSA-N	3	0.0584454	1.56131	1.56205	3.74158	Elbe	HMP/VMP
Aliskiren	173334-57-1	pos	2014	E4	365	[M+H]+	InChI=1S/C30H53N3O6/c1-19(2)22(14-21-10-11-26(38-8)27(15-21)39-13-9-12-37-7)16-24(31)25(34)17-23(20(3)4)28(35)33-18-30(5,6)29(32)36/h10-11,15,19-20,22-25,34H,9,12-14,16-18,31H2,1-8H3,(H2,32,36)(H,33,35)/t22-,23-,24-,25-/m0/s1	UXOWGYHJODZGMF-QORCZRPOSA-N	3	0.0664948	1.02095	1.02239	6.50385	Elbe	HMP/VMP
Aliskiren	173334-57-1	pos	2014	Mu	365	[M+H]+	InChI=1S/C30H53N3O6/c1-19(2)22(14-21-10-11-26(38-8)27(15-21)39-13-9-12-37-7)16-24(31)25(34)17-23(20(3)4)28(35)33-18-30(5,6)29(32)36/h10-11,15,19-20,22-25,34H,9,12-14,16-18,31H2,1-8H3,(H2,32,36)(H,33,35)/t22-,23-,24-,25-/m0/s1	UXOWGYHJODZGMF-QORCZRPOSA-N	2	0.920494	2.97511	3.04548	30.2249	Mulde	HMP/VMP
Aliskiren	173334-57-1	pos	2014	R4	365	[M+H]+	InChI=1S/C30H53N3O6/c1-19(2)22(14-21-10-11-26(38-8)27(15-21)39-13-9-12-37-7)16-24(31)25(34)17-23(20(3)4)28(35)33-18-30(5,6)29(32)36/h10-11,15,19-20,22-25,34H,9,12-14,16-18,31H2,1-8H3,(H2,32,36)(H,33,35)/t22-,23-,24-,25-/m0/s1	UXOWGYHJODZGMF-QORCZRPOSA-N	3	0.128529	1.26406	1.26843	10.133	Rhine	HMP/VMP
Aliskiren	173334-57-1	pos	2014	R3	365	[M+H]+	InChI=1S/C30H53N3O6/c1-19(2)22(14-21-10-11-26(38-8)27(15-21)39-13-9-12-37-7)16-24(31)25(34)17-23(20(3)4)28(35)33-18-30(5,6)29(32)36/h10-11,15,19-20,22-25,34H,9,12-14,16-18,31H2,1-8H3,(H2,32,36)(H,33,35)/t22-,23-,24-,25-/m0/s1	UXOWGYHJODZGMF-QORCZRPOSA-N	3	0.0785753	0.930273	0.932521	8.42612	Rhine	HMP/VMP
Aliskiren	173334-57-1	pos	2014	R1	365	[M+H]+	InChI=1S/C30H53N3O6/c1-19(2)22(14-21-10-11-26(38-8)27(15-21)39-13-9-12-37-7)16-24(31)25(34)17-23(20(3)4)28(35)33-18-30(5,6)29(32)36/h10-11,15,19-20,22-25,34H,9,12-14,16-18,31H2,1-8H3,(H2,32,36)(H,33,35)/t22-,23-,24-,25-/m0/s1	UXOWGYHJODZGMF-QORCZRPOSA-N	3	0.00259867	0.638325	0.638329	0.407105	Rhine	HMP/VMP
Aliskiren	173334-57-1	pos	2014	Sa	365	[M+H]+	InChI=1S/C30H53N3O6/c1-19(2)22(14-21-10-11-26(38-8)27(15-21)39-13-9-12-37-7)16-24(31)25(34)17-23(20(3)4)28(35)33-18-30(5,6)29(32)36/h10-11,15,19-20,22-25,34H,9,12-14,16-18,31H2,1-8H3,(H2,32,36)(H,33,35)/t22-,23-,24-,25-/m0/s1	UXOWGYHJODZGMF-QORCZRPOSA-N	3	1.19395	6.31607	6.395	18.6701	Saale	HMP/VMP
Aliskiren	173334-57-1	pos	2014	S1	365	[M+H]+	InChI=1S/C30H53N3O6/c1-19(2)22(14-21-10-11-26(38-8)27(15-21)39-13-9-12-37-7)16-24(31)25(34)17-23(20(3)4)28(35)33-18-30(5,6)29(32)36/h10-11,15,19-20,22-25,34H,9,12-14,16-18,31H2,1-8H3,(H2,32,36)(H,33,35)/t22-,23-,24-,25-/m0/s1	UXOWGYHJODZGMF-QORCZRPOSA-N	3	0.215687	1.54182	1.55139	13.9029	Saar	HMP/VMP
Aliskiren	173334-57-1	pos	2014	S2	365	[M+H]+	InChI=1S/C30H53N3O6/c1-19(2)22(14-21-10-11-26(38-8)27(15-21)39-13-9-12-37-7)16-24(31)25(34)17-23(20(3)4)28(35)33-18-30(5,6)29(32)36/h10-11,15,19-20,22-25,34H,9,12-14,16-18,31H2,1-8H3,(H2,32,36)(H,33,35)/t22-,23-,24-,25-/m0/s1	UXOWGYHJODZGMF-QORCZRPOSA-N	3	0.586156	2.05549	2.11502	27.714	Saar	HMP/VMP
Aliskiren	173334-57-1	pos	2015	D1	365	[M+H]+	InChI=1S/C30H53N3O6/c1-19(2)22(14-21-10-11-26(38-8)27(15-21)39-13-9-12-37-7)16-24(31)25(34)17-23(20(3)4)28(35)33-18-30(5,6)29(32)36/h10-11,15,19-20,22-25,34H,9,12-14,16-18,31H2,1-8H3,(H2,32,36)(H,33,35)/t22-,23-,24-,25-/m0/s1	UXOWGYHJODZGMF-QORCZRPOSA-N	3	0.117175	0.386853	0.399669	29.3179	Danube	HMP/VMP
Aliskiren	173334-57-1	pos	2015	E5	365	[M+H]+	InChI=1S/C30H53N3O6/c1-19(2)22(14-21-10-11-26(38-8)27(15-21)39-13-9-12-37-7)16-24(31)25(34)17-23(20(3)4)28(35)33-18-30(5,6)29(32)36/h10-11,15,19-20,22-25,34H,9,12-14,16-18,31H2,1-8H3,(H2,32,36)(H,33,35)/t22-,23-,24-,25-/m0/s1	UXOWGYHJODZGMF-QORCZRPOSA-N	3	0.0460371	0.983138	0.983861	4.67923	Elbe	HMP/VMP
Aliskiren	173334-57-1	pos	2015	E4	365	[M+H]+	InChI=1S/C30H53N3O6/c1-19(2)22(14-21-10-11-26(38-8)27(15-21)39-13-9-12-37-7)16-24(31)25(34)17-23(20(3)4)28(35)33-18-30(5,6)29(32)36/h10-11,15,19-20,22-25,34H,9,12-14,16-18,31H2,1-8H3,(H2,32,36)(H,33,35)/t22-,23-,24-,25-/m0/s1	UXOWGYHJODZGMF-QORCZRPOSA-N	3	0.0876536	0.83869	0.841712	10.4137	Elbe	HMP/VMP
Aliskiren	173334-57-1	pos	2015	Mu	365	[M+H]+	InChI=1S/C30H53N3O6/c1-19(2)22(14-21-10-11-26(38-8)27(15-21)39-13-9-12-37-7)16-24(31)25(34)17-23(20(3)4)28(35)33-18-30(5,6)29(32)36/h10-11,15,19-20,22-25,34H,9,12-14,16-18,31H2,1-8H3,(H2,32,36)(H,33,35)/t22-,23-,24-,25-/m0/s1	UXOWGYHJODZGMF-QORCZRPOSA-N	3	0.666547	4.39731	4.43288	15.0364	Mulde	HMP/VMP
Aliskiren	173334-57-1	pos	2015	R4	365	[M+H]+	InChI=1S/C30H53N3O6/c1-19(2)22(14-21-10-11-26(38-8)27(15-21)39-13-9-12-37-7)16-24(31)25(34)17-23(20(3)4)28(35)33-18-30(5,6)29(32)36/h10-11,15,19-20,22-25,34H,9,12-14,16-18,31H2,1-8H3,(H2,32,36)(H,33,35)/t22-,23-,24-,25-/m0/s1	UXOWGYHJODZGMF-QORCZRPOSA-N	3	0.0753767	1.13581	1.13746	6.62677	Rhine	HMP/VMP
Aliskiren	173334-57-1	pos	2015	R3	365	[M+H]+	InChI=1S/C30H53N3O6/c1-19(2)22(14-21-10-11-26(38-8)27(15-21)39-13-9-12-37-7)16-24(31)25(34)17-23(20(3)4)28(35)33-18-30(5,6)29(32)36/h10-11,15,19-20,22-25,34H,9,12-14,16-18,31H2,1-8H3,(H2,32,36)(H,33,35)/t22-,23-,24-,25-/m0/s1	UXOWGYHJODZGMF-QORCZRPOSA-N	3	0.118537	0.728344	0.734909	16.1294	Rhine	HMP/VMP
Aliskiren	173334-57-1	pos	2015	R1	365	[M+H]+	InChI=1S/C30H53N3O6/c1-19(2)22(14-21-10-11-26(38-8)27(15-21)39-13-9-12-37-7)16-24(31)25(34)17-23(20(3)4)28(35)33-18-30(5,6)29(32)36/h10-11,15,19-20,22-25,34H,9,12-14,16-18,31H2,1-8H3,(H2,32,36)(H,33,35)/t22-,23-,24-,25-/m0/s1	UXOWGYHJODZGMF-QORCZRPOSA-N	3	0.0109047	0.33464	0.334758	3.2575	Rhine	HMP/VMP
Aliskiren	173334-57-1	pos	2015	Sa	365	[M+H]+	InChI=1S/C30H53N3O6/c1-19(2)22(14-21-10-11-26(38-8)27(15-21)39-13-9-12-37-7)16-24(31)25(34)17-23(20(3)4)28(35)33-18-30(5,6)29(32)36/h10-11,15,19-20,22-25,34H,9,12-14,16-18,31H2,1-8H3,(H2,32,36)(H,33,35)/t22-,23-,24-,25-/m0/s1	UXOWGYHJODZGMF-QORCZRPOSA-N	3	0.989424	4.39808	4.4764	22.1031	Saale	HMP/VMP
Aliskiren	173334-57-1	pos	2015	S1	365	[M+H]+	InChI=1S/C30H53N3O6/c1-19(2)22(14-21-10-11-26(38-8)27(15-21)39-13-9-12-37-7)16-24(31)25(34)17-23(20(3)4)28(35)33-18-30(5,6)29(32)36/h10-11,15,19-20,22-25,34H,9,12-14,16-18,31H2,1-8H3,(H2,32,36)(H,33,35)/t22-,23-,24-,25-/m0/s1	UXOWGYHJODZGMF-QORCZRPOSA-N	3	0.0613569	1.46242	1.46327	4.19314	Saar	HMP/VMP
Aliskiren	173334-57-1	pos	2015	S2	365	[M+H]+	InChI=1S/C30H53N3O6/c1-19(2)22(14-21-10-11-26(38-8)27(15-21)39-13-9-12-37-7)16-24(31)25(34)17-23(20(3)4)28(35)33-18-30(5,6)29(32)36/h10-11,15,19-20,22-25,34H,9,12-14,16-18,31H2,1-8H3,(H2,32,36)(H,33,35)/t22-,23-,24-,25-/m0/s1	UXOWGYHJODZGMF-QORCZRPOSA-N	3	0.608845	1.5546	1.63897	37.1479	Saar	HMP/VMP
Aliskiren	173334-57-1	pos	2016	D1	365	[M+H]+	InChI=1S/C30H53N3O6/c1-19(2)22(14-21-10-11-26(38-8)27(15-21)39-13-9-12-37-7)16-24(31)25(34)17-23(20(3)4)28(35)33-18-30(5,6)29(32)36/h10-11,15,19-20,22-25,34H,9,12-14,16-18,31H2,1-8H3,(H2,32,36)(H,33,35)/t22-,23-,24-,25-/m0/s1	UXOWGYHJODZGMF-QORCZRPOSA-N	3	0.0754597	0.25901	0.267035	28.2584	Danube	HMP/VMP
Aliskiren	173334-57-1	pos	2016	E5	365	[M+H]+	InChI=1S/C30H53N3O6/c1-19(2)22(14-21-10-11-26(38-8)27(15-21)39-13-9-12-37-7)16-24(31)25(34)17-23(20(3)4)28(35)33-18-30(5,6)29(32)36/h10-11,15,19-20,22-25,34H,9,12-14,16-18,31H2,1-8H3,(H2,32,36)(H,33,35)/t22-,23-,24-,25-/m0/s1	UXOWGYHJODZGMF-QORCZRPOSA-N	3	0.224664	0.661953	0.684261	32.8331	Elbe	HMP/VMP
Aliskiren	173334-57-1	pos	2016	E4	365	[M+H]+	InChI=1S/C30H53N3O6/c1-19(2)22(14-21-10-11-26(38-8)27(15-21)39-13-9-12-37-7)16-24(31)25(34)17-23(20(3)4)28(35)33-18-30(5,6)29(32)36/h10-11,15,19-20,22-25,34H,9,12-14,16-18,31H2,1-8H3,(H2,32,36)(H,33,35)/t22-,23-,24-,25-/m0/s1	UXOWGYHJODZGMF-QORCZRPOSA-N	3	0.0505973	1.15555	1.1563	4.37579	Elbe	HMP/VMP
Aliskiren	173334-57-1	pos	2016	Mu	365	[M+H]+	InChI=1S/C30H53N3O6/c1-19(2)22(14-21-10-11-26(38-8)27(15-21)39-13-9-12-37-7)16-24(31)25(34)17-23(20(3)4)28(35)33-18-30(5,6)29(32)36/h10-11,15,19-20,22-25,34H,9,12-14,16-18,31H2,1-8H3,(H2,32,36)(H,33,35)/t22-,23-,24-,25-/m0/s1	UXOWGYHJODZGMF-QORCZRPOSA-N	3	0.409208	4.52081	4.53285	9.0276	Mulde	HMP/VMP
Aliskiren	173334-57-1	pos	2016	R4	365	[M+H]+	InChI=1S/C30H53N3O6/c1-19(2)22(14-21-10-11-26(38-8)27(15-21)39-13-9-12-37-7)16-24(31)25(34)17-23(20(3)4)28(35)33-18-30(5,6)29(32)36/h10-11,15,19-20,22-25,34H,9,12-14,16-18,31H2,1-8H3,(H2,32,36)(H,33,35)/t22-,23-,24-,25-/m0/s1	UXOWGYHJODZGMF-QORCZRPOSA-N	3	0.0344104	1.10146	1.10182	3.12305	Rhine	HMP/VMP
Aliskiren	173334-57-1	pos	2016	R3	365	[M+H]+	InChI=1S/C30H53N3O6/c1-19(2)22(14-21-10-11-26(38-8)27(15-21)39-13-9-12-37-7)16-24(31)25(34)17-23(20(3)4)28(35)33-18-30(5,6)29(32)36/h10-11,15,19-20,22-25,34H,9,12-14,16-18,31H2,1-8H3,(H2,32,36)(H,33,35)/t22-,23-,24-,25-/m0/s1	UXOWGYHJODZGMF-QORCZRPOSA-N	3	0.149811	0.928879	0.936446	15.9978	Rhine	HMP/VMP
Aliskiren	173334-57-1	pos	2016	R1	365	[M+H]+	InChI=1S/C30H53N3O6/c1-19(2)22(14-21-10-11-26(38-8)27(15-21)39-13-9-12-37-7)16-24(31)25(34)17-23(20(3)4)28(35)33-18-30(5,6)29(32)36/h10-11,15,19-20,22-25,34H,9,12-14,16-18,31H2,1-8H3,(H2,32,36)(H,33,35)/t22-,23-,24-,25-/m0/s1	UXOWGYHJODZGMF-QORCZRPOSA-N	3	0.033793	0.500346	0.501091	6.74389	Rhine	HMP/VMP
Aliskiren	173334-57-1	pos	2016	Sa	365	[M+H]+	InChI=1S/C30H53N3O6/c1-19(2)22(14-21-10-11-26(38-8)27(15-21)39-13-9-12-37-7)16-24(31)25(34)17-23(20(3)4)28(35)33-18-30(5,6)29(32)36/h10-11,15,19-20,22-25,34H,9,12-14,16-18,31H2,1-8H3,(H2,32,36)(H,33,35)/t22-,23-,24-,25-/m0/s1	UXOWGYHJODZGMF-QORCZRPOSA-N	3	0.74223	4.5272	4.57026	16.2404	Saale	HMP/VMP
Aliskiren	173334-57-1	pos	2016	S1	365	[M+H]+	InChI=1S/C30H53N3O6/c1-19(2)22(14-21-10-11-26(38-8)27(15-21)39-13-9-12-37-7)16-24(31)25(34)17-23(20(3)4)28(35)33-18-30(5,6)29(32)36/h10-11,15,19-20,22-25,34H,9,12-14,16-18,31H2,1-8H3,(H2,32,36)(H,33,35)/t22-,23-,24-,25-/m0/s1	UXOWGYHJODZGMF-QORCZRPOSA-N	3	0.0203219	1.38817	1.38827	1.46383	Saar	HMP/VMP
Aliskiren	173334-57-1	pos	2016	S2	365	[M+H]+	InChI=1S/C30H53N3O6/c1-19(2)22(14-21-10-11-26(38-8)27(15-21)39-13-9-12-37-7)16-24(31)25(34)17-23(20(3)4)28(35)33-18-30(5,6)29(32)36/h10-11,15,19-20,22-25,34H,9,12-14,16-18,31H2,1-8H3,(H2,32,36)(H,33,35)/t22-,23-,24-,25-/m0/s1	UXOWGYHJODZGMF-QORCZRPOSA-N	3	0.346083	2.21334	2.23049	15.516	Saar	HMP/VMP
Aliskiren	173334-57-1	pos	2017	D1	365	[M+H]+	InChI=1S/C30H53N3O6/c1-19(2)22(14-21-10-11-26(38-8)27(15-21)39-13-9-12-37-7)16-24(31)25(34)17-23(20(3)4)28(35)33-18-30(5,6)29(32)36/h10-11,15,19-20,22-25,34H,9,12-14,16-18,31H2,1-8H3,(H2,32,36)(H,33,35)/t22-,23-,24-,25-/m0/s1	UXOWGYHJODZGMF-QORCZRPOSA-N	3	0.0531615	0.227615	0.231777	22.9365	Danube	HMP/VMP
Aliskiren	173334-57-1	pos	2017	E5	365	[M+H]+	InChI=1S/C30H53N3O6/c1-19(2)22(14-21-10-11-26(38-8)27(15-21)39-13-9-12-37-7)16-24(31)25(34)17-23(20(3)4)28(35)33-18-30(5,6)29(32)36/h10-11,15,19-20,22-25,34H,9,12-14,16-18,31H2,1-8H3,(H2,32,36)(H,33,35)/t22-,23-,24-,25-/m0/s1	UXOWGYHJODZGMF-QORCZRPOSA-N	3	0.295971	0.367104	0.440466	67.195	Elbe	HMP/VMP
Aliskiren	173334-57-1	pos	2017	E4	365	[M+H]+	InChI=1S/C30H53N3O6/c1-19(2)22(14-21-10-11-26(38-8)27(15-21)39-13-9-12-37-7)16-24(31)25(34)17-23(20(3)4)28(35)33-18-30(5,6)29(32)36/h10-11,15,19-20,22-25,34H,9,12-14,16-18,31H2,1-8H3,(H2,32,36)(H,33,35)/t22-,23-,24-,25-/m0/s1	UXOWGYHJODZGMF-QORCZRPOSA-N	3	0.024846	0.970019	0.970233	2.56083	Elbe	HMP/VMP
Aliskiren	173334-57-1	pos	2017	Mu	365	[M+H]+	InChI=1S/C30H53N3O6/c1-19(2)22(14-21-10-11-26(38-8)27(15-21)39-13-9-12-37-7)16-24(31)25(34)17-23(20(3)4)28(35)33-18-30(5,6)29(32)36/h10-11,15,19-20,22-25,34H,9,12-14,16-18,31H2,1-8H3,(H2,32,36)(H,33,35)/t22-,23-,24-,25-/m0/s1	UXOWGYHJODZGMF-QORCZRPOSA-N	3	0.526979	3.60956	3.63553	14.4952	Mulde	HMP/VMP
Aliskiren	173334-57-1	pos	2017	R4	365	[M+H]+	InChI=1S/C30H53N3O6/c1-19(2)22(14-21-10-11-26(38-8)27(15-21)39-13-9-12-37-7)16-24(31)25(34)17-23(20(3)4)28(35)33-18-30(5,6)29(32)36/h10-11,15,19-20,22-25,34H,9,12-14,16-18,31H2,1-8H3,(H2,32,36)(H,33,35)/t22-,23-,24-,25-/m0/s1	UXOWGYHJODZGMF-QORCZRPOSA-N	3	0.0417794	0.979724	0.98031	4.26185	Rhine	HMP/VMP
Aliskiren	173334-57-1	pos	2017	R3	365	[M+H]+	InChI=1S/C30H53N3O6/c1-19(2)22(14-21-10-11-26(38-8)27(15-21)39-13-9-12-37-7)16-24(31)25(34)17-23(20(3)4)28(35)33-18-30(5,6)29(32)36/h10-11,15,19-20,22-25,34H,9,12-14,16-18,31H2,1-8H3,(H2,32,36)(H,33,35)/t22-,23-,24-,25-/m0/s1	UXOWGYHJODZGMF-QORCZRPOSA-N	3	0.170764	0.92853	0.938904	18.1875	Rhine	HMP/VMP
Aliskiren	173334-57-1	pos	2017	R1	365	[M+H]+	InChI=1S/C30H53N3O6/c1-19(2)22(14-21-10-11-26(38-8)27(15-21)39-13-9-12-37-7)16-24(31)25(34)17-23(20(3)4)28(35)33-18-30(5,6)29(32)36/h10-11,15,19-20,22-25,34H,9,12-14,16-18,31H2,1-8H3,(H2,32,36)(H,33,35)/t22-,23-,24-,25-/m0/s1	UXOWGYHJODZGMF-QORCZRPOSA-N	3	0.0129538	0.394303	0.394443	3.28406	Rhine	HMP/VMP
Aliskiren	173334-57-1	pos	2017	Sa	365	[M+H]+	InChI=1S/C30H53N3O6/c1-19(2)22(14-21-10-11-26(38-8)27(15-21)39-13-9-12-37-7)16-24(31)25(34)17-23(20(3)4)28(35)33-18-30(5,6)29(32)36/h10-11,15,19-20,22-25,34H,9,12-14,16-18,31H2,1-8H3,(H2,32,36)(H,33,35)/t22-,23-,24-,25-/m0/s1	UXOWGYHJODZGMF-QORCZRPOSA-N	3	0.566898	3.12801	3.16452	17.9142	Saale	HMP/VMP
Aliskiren	173334-57-1	pos	2017	S1	365	[M+H]+	InChI=1S/C30H53N3O6/c1-19(2)22(14-21-10-11-26(38-8)27(15-21)39-13-9-12-37-7)16-24(31)25(34)17-23(20(3)4)28(35)33-18-30(5,6)29(32)36/h10-11,15,19-20,22-25,34H,9,12-14,16-18,31H2,1-8H3,(H2,32,36)(H,33,35)/t22-,23-,24-,25-/m0/s1	UXOWGYHJODZGMF-QORCZRPOSA-N	3	0.0841865	1.45081	1.45242	5.79631	Saar	HMP/VMP
Aliskiren	173334-57-1	pos	2017	S2	365	[M+H]+	InChI=1S/C30H53N3O6/c1-19(2)22(14-21-10-11-26(38-8)27(15-21)39-13-9-12-37-7)16-24(31)25(34)17-23(20(3)4)28(35)33-18-30(5,6)29(32)36/h10-11,15,19-20,22-25,34H,9,12-14,16-18,31H2,1-8H3,(H2,32,36)(H,33,35)/t22-,23-,24-,25-/m0/s1	UXOWGYHJODZGMF-QORCZRPOSA-N	3	0.0412614	2.40307	2.40331	1.71686	Saar	HMP/VMP
Aliskiren	173334-57-1	pos	2018	D1	365	[M+H]+	InChI=1S/C30H53N3O6/c1-19(2)22(14-21-10-11-26(38-8)27(15-21)39-13-9-12-37-7)16-24(31)25(34)17-23(20(3)4)28(35)33-18-30(5,6)29(32)36/h10-11,15,19-20,22-25,34H,9,12-14,16-18,31H2,1-8H3,(H2,32,36)(H,33,35)/t22-,23-,24-,25-/m0/s1	UXOWGYHJODZGMF-QORCZRPOSA-N	3	0.0328363	0.386396	0.387298	8.47832	Danube	HMP/VMP
Aliskiren	173334-57-1	pos	2018	E5	365	[M+H]+	InChI=1S/C30H53N3O6/c1-19(2)22(14-21-10-11-26(38-8)27(15-21)39-13-9-12-37-7)16-24(31)25(34)17-23(20(3)4)28(35)33-18-30(5,6)29(32)36/h10-11,15,19-20,22-25,34H,9,12-14,16-18,31H2,1-8H3,(H2,32,36)(H,33,35)/t22-,23-,24-,25-/m0/s1	UXOWGYHJODZGMF-QORCZRPOSA-N	3	0.0130697	0.771766	0.77184	1.69331	Elbe	HMP/VMP
Aliskiren	173334-57-1	pos	2018	E4	365	[M+H]+	InChI=1S/C30H53N3O6/c1-19(2)22(14-21-10-11-26(38-8)27(15-21)39-13-9-12-37-7)16-24(31)25(34)17-23(20(3)4)28(35)33-18-30(5,6)29(32)36/h10-11,15,19-20,22-25,34H,9,12-14,16-18,31H2,1-8H3,(H2,32,36)(H,33,35)/t22-,23-,24-,25-/m0/s1	UXOWGYHJODZGMF-QORCZRPOSA-N	2	0.0267015	0.494373	0.494733	5.39715	Elbe	HMP/VMP
Aliskiren	173334-57-1	pos	2018	Mu	365	[M+H]+	InChI=1S/C30H53N3O6/c1-19(2)22(14-21-10-11-26(38-8)27(15-21)39-13-9-12-37-7)16-24(31)25(34)17-23(20(3)4)28(35)33-18-30(5,6)29(32)36/h10-11,15,19-20,22-25,34H,9,12-14,16-18,31H2,1-8H3,(H2,32,36)(H,33,35)/t22-,23-,24-,25-/m0/s1	UXOWGYHJODZGMF-QORCZRPOSA-N	3	0.399181	1.98533	2.01004	19.8593	Mulde	HMP/VMP
Aliskiren	173334-57-1	pos	2018	R4	365	[M+H]+	InChI=1S/C30H53N3O6/c1-19(2)22(14-21-10-11-26(38-8)27(15-21)39-13-9-12-37-7)16-24(31)25(34)17-23(20(3)4)28(35)33-18-30(5,6)29(32)36/h10-11,15,19-20,22-25,34H,9,12-14,16-18,31H2,1-8H3,(H2,32,36)(H,33,35)/t22-,23-,24-,25-/m0/s1	UXOWGYHJODZGMF-QORCZRPOSA-N	3	0.0140011	0.692397	0.692491	2.02184	Rhine	HMP/VMP
Aliskiren	173334-57-1	pos	2018	R3	365	[M+H]+	InChI=1S/C30H53N3O6/c1-19(2)22(14-21-10-11-26(38-8)27(15-21)39-13-9-12-37-7)16-24(31)25(34)17-23(20(3)4)28(35)33-18-30(5,6)29(32)36/h10-11,15,19-20,22-25,34H,9,12-14,16-18,31H2,1-8H3,(H2,32,36)(H,33,35)/t22-,23-,24-,25-/m0/s1	UXOWGYHJODZGMF-QORCZRPOSA-N	3	0.0730641	0.654461	0.657215	11.1172	Rhine	HMP/VMP
Aliskiren	173334-57-1	pos	2018	R1	365	[M+H]+	InChI=1S/C30H53N3O6/c1-19(2)22(14-21-10-11-26(38-8)27(15-21)39-13-9-12-37-7)16-24(31)25(34)17-23(20(3)4)28(35)33-18-30(5,6)29(32)36/h10-11,15,19-20,22-25,34H,9,12-14,16-18,31H2,1-8H3,(H2,32,36)(H,33,35)/t22-,23-,24-,25-/m0/s1	UXOWGYHJODZGMF-QORCZRPOSA-N	3	0.0120491	0.340624	0.340765	3.53589	Rhine	HMP/VMP
Aliskiren	173334-57-1	pos	2018	Sa	365	[M+H]+	InChI=1S/C30H53N3O6/c1-19(2)22(14-21-10-11-26(38-8)27(15-21)39-13-9-12-37-7)16-24(31)25(34)17-23(20(3)4)28(35)33-18-30(5,6)29(32)36/h10-11,15,19-20,22-25,34H,9,12-14,16-18,31H2,1-8H3,(H2,32,36)(H,33,35)/t22-,23-,24-,25-/m0/s1	UXOWGYHJODZGMF-QORCZRPOSA-N	3	0.128459	2.4101	2.41241	5.32494	Saale	HMP/VMP
Aliskiren	173334-57-1	pos	2018	S1	365	[M+H]+	InChI=1S/C30H53N3O6/c1-19(2)22(14-21-10-11-26(38-8)27(15-21)39-13-9-12-37-7)16-24(31)25(34)17-23(20(3)4)28(35)33-18-30(5,6)29(32)36/h10-11,15,19-20,22-25,34H,9,12-14,16-18,31H2,1-8H3,(H2,32,36)(H,33,35)/t22-,23-,24-,25-/m0/s1	UXOWGYHJODZGMF-QORCZRPOSA-N	3	0.030256	0.838599	0.838964	3.60636	Saar	HMP/VMP
Aliskiren	173334-57-1	pos	2018	S2	365	[M+H]+	InChI=1S/C30H53N3O6/c1-19(2)22(14-21-10-11-26(38-8)27(15-21)39-13-9-12-37-7)16-24(31)25(34)17-23(20(3)4)28(35)33-18-30(5,6)29(32)36/h10-11,15,19-20,22-25,34H,9,12-14,16-18,31H2,1-8H3,(H2,32,36)(H,33,35)/t22-,23-,24-,25-/m0/s1	UXOWGYHJODZGMF-QORCZRPOSA-N	3	0.0621976	1.17475	1.17584	5.28965	Saar	HMP/VMP
Aliskiren	173334-57-1	pos	2019	E5	365	[M+H]+	InChI=1S/C30H53N3O6/c1-19(2)22(14-21-10-11-26(38-8)27(15-21)39-13-9-12-37-7)16-24(31)25(34)17-23(20(3)4)28(35)33-18-30(5,6)29(32)36/h10-11,15,19-20,22-25,34H,9,12-14,16-18,31H2,1-8H3,(H2,32,36)(H,33,35)/t22-,23-,24-,25-/m0/s1	UXOWGYHJODZGMF-QORCZRPOSA-N	3	0.0261577	0.507886	0.508327	5.14583	Elbe	HMP/VMP
Aliskiren	173334-57-1	pos	2019	E4	365	[M+H]+	InChI=1S/C30H53N3O6/c1-19(2)22(14-21-10-11-26(38-8)27(15-21)39-13-9-12-37-7)16-24(31)25(34)17-23(20(3)4)28(35)33-18-30(5,6)29(32)36/h10-11,15,19-20,22-25,34H,9,12-14,16-18,31H2,1-8H3,(H2,32,36)(H,33,35)/t22-,23-,24-,25-/m0/s1	UXOWGYHJODZGMF-QORCZRPOSA-N	3	0.0985149	0.405798	0.414348	23.7759	Elbe	HMP/VMP
Aliskiren	173334-57-1	pos	2019	Mu	365	[M+H]+	InChI=1S/C30H53N3O6/c1-19(2)22(14-21-10-11-26(38-8)27(15-21)39-13-9-12-37-7)16-24(31)25(34)17-23(20(3)4)28(35)33-18-30(5,6)29(32)36/h10-11,15,19-20,22-25,34H,9,12-14,16-18,31H2,1-8H3,(H2,32,36)(H,33,35)/t22-,23-,24-,25-/m0/s1	UXOWGYHJODZGMF-QORCZRPOSA-N	3	0.237503	2.47144	2.47926	9.57957	Mulde	HMP/VMP
Aliskiren	173334-57-1	pos	2019	R4	365	[M+H]+	InChI=1S/C30H53N3O6/c1-19(2)22(14-21-10-11-26(38-8)27(15-21)39-13-9-12-37-7)16-24(31)25(34)17-23(20(3)4)28(35)33-18-30(5,6)29(32)36/h10-11,15,19-20,22-25,34H,9,12-14,16-18,31H2,1-8H3,(H2,32,36)(H,33,35)/t22-,23-,24-,25-/m0/s1	UXOWGYHJODZGMF-QORCZRPOSA-N	3	0.0915577	0.500131	0.5061	18.0908	Rhine	HMP/VMP
Aliskiren	173334-57-1	pos	2019	R3	365	[M+H]+	InChI=1S/C30H53N3O6/c1-19(2)22(14-21-10-11-26(38-8)27(15-21)39-13-9-12-37-7)16-24(31)25(34)17-23(20(3)4)28(35)33-18-30(5,6)29(32)36/h10-11,15,19-20,22-25,34H,9,12-14,16-18,31H2,1-8H3,(H2,32,36)(H,33,35)/t22-,23-,24-,25-/m0/s1	UXOWGYHJODZGMF-QORCZRPOSA-N	2	0.0646719	0.494413	0.496524	13.0249	Rhine	HMP/VMP
Aliskiren	173334-57-1	pos	2019	Sa	365	[M+H]+	InChI=1S/C30H53N3O6/c1-19(2)22(14-21-10-11-26(38-8)27(15-21)39-13-9-12-37-7)16-24(31)25(34)17-23(20(3)4)28(35)33-18-30(5,6)29(32)36/h10-11,15,19-20,22-25,34H,9,12-14,16-18,31H2,1-8H3,(H2,32,36)(H,33,35)/t22-,23-,24-,25-/m0/s1	UXOWGYHJODZGMF-QORCZRPOSA-N	3	0.932073	0.995114	1.2619	73.8628	Saale	HMP/VMP
Aliskiren	173334-57-1	pos	2019	S1	365	[M+H]+	InChI=1S/C30H53N3O6/c1-19(2)22(14-21-10-11-26(38-8)27(15-21)39-13-9-12-37-7)16-24(31)25(34)17-23(20(3)4)28(35)33-18-30(5,6)29(32)36/h10-11,15,19-20,22-25,34H,9,12-14,16-18,31H2,1-8H3,(H2,32,36)(H,33,35)/t22-,23-,24-,25-/m0/s1	UXOWGYHJODZGMF-QORCZRPOSA-N	3	0.0759945	0.568879	0.572424	13.2759	Saar	HMP/VMP
Aliskiren	173334-57-1	pos	2019	S2	365	[M+H]+	InChI=1S/C30H53N3O6/c1-19(2)22(14-21-10-11-26(38-8)27(15-21)39-13-9-12-37-7)16-24(31)25(34)17-23(20(3)4)28(35)33-18-30(5,6)29(32)36/h10-11,15,19-20,22-25,34H,9,12-14,16-18,31H2,1-8H3,(H2,32,36)(H,33,35)/t22-,23-,24-,25-/m0/s1	UXOWGYHJODZGMF-QORCZRPOSA-N	3	0.100654	1.32368	1.32615	7.58992	Saar	HMP/VMP
Aliskiren	173334-57-1	pos	2020	D1	365	[M+H]+	InChI=1S/C30H53N3O6/c1-19(2)22(14-21-10-11-26(38-8)27(15-21)39-13-9-12-37-7)16-24(31)25(34)17-23(20(3)4)28(35)33-18-30(5,6)29(32)36/h10-11,15,19-20,22-25,34H,9,12-14,16-18,31H2,1-8H3,(H2,32,36)(H,33,35)/t22-,23-,24-,25-/m0/s1	UXOWGYHJODZGMF-QORCZRPOSA-N	3	0.0218465	0.119632	0.120872	18.0741	Danube	HMP/VMP
Aliskiren	173334-57-1	pos	2020	E5	365	[M+H]+	InChI=1S/C30H53N3O6/c1-19(2)22(14-21-10-11-26(38-8)27(15-21)39-13-9-12-37-7)16-24(31)25(34)17-23(20(3)4)28(35)33-18-30(5,6)29(32)36/h10-11,15,19-20,22-25,34H,9,12-14,16-18,31H2,1-8H3,(H2,32,36)(H,33,35)/t22-,23-,24-,25-/m0/s1	UXOWGYHJODZGMF-QORCZRPOSA-N	3	0.0415512	0.181006	0.184436	22.5288	Elbe	HMP/VMP
Aliskiren	173334-57-1	pos	2020	E4	365	[M+H]+	InChI=1S/C30H53N3O6/c1-19(2)22(14-21-10-11-26(38-8)27(15-21)39-13-9-12-37-7)16-24(31)25(34)17-23(20(3)4)28(35)33-18-30(5,6)29(32)36/h10-11,15,19-20,22-25,34H,9,12-14,16-18,31H2,1-8H3,(H2,32,36)(H,33,35)/t22-,23-,24-,25-/m0/s1	UXOWGYHJODZGMF-QORCZRPOSA-N	3	0.0294036	0.500753	0.501317	5.86528	Elbe	HMP/VMP
Aliskiren	173334-57-1	pos	2020	E2	365	[M+H]+	InChI=1S/C30H53N3O6/c1-19(2)22(14-21-10-11-26(38-8)27(15-21)39-13-9-12-37-7)16-24(31)25(34)17-23(20(3)4)28(35)33-18-30(5,6)29(32)36/h10-11,15,19-20,22-25,34H,9,12-14,16-18,31H2,1-8H3,(H2,32,36)(H,33,35)/t22-,23-,24-,25-/m0/s1	UXOWGYHJODZGMF-QORCZRPOSA-N	2	0.0190324	0.120031	0.120783	15.7575	Elbe	HMP/VMP
Aliskiren	173334-57-1	pos	2020	Mu	365	[M+H]+	InChI=1S/C30H53N3O6/c1-19(2)22(14-21-10-11-26(38-8)27(15-21)39-13-9-12-37-7)16-24(31)25(34)17-23(20(3)4)28(35)33-18-30(5,6)29(32)36/h10-11,15,19-20,22-25,34H,9,12-14,16-18,31H2,1-8H3,(H2,32,36)(H,33,35)/t22-,23-,24-,25-/m0/s1	UXOWGYHJODZGMF-QORCZRPOSA-N	3	0.141188	1.66128	1.66527	8.47838	Mulde	HMP/VMP
Aliskiren	173334-57-1	pos	2020	R4	365	[M+H]+	InChI=1S/C30H53N3O6/c1-19(2)22(14-21-10-11-26(38-8)27(15-21)39-13-9-12-37-7)16-24(31)25(34)17-23(20(3)4)28(35)33-18-30(5,6)29(32)36/h10-11,15,19-20,22-25,34H,9,12-14,16-18,31H2,1-8H3,(H2,32,36)(H,33,35)/t22-,23-,24-,25-/m0/s1	UXOWGYHJODZGMF-QORCZRPOSA-N	3	0.0633312	0.386347	0.38965	16.2534	Rhine	HMP/VMP
Aliskiren	173334-57-1	pos	2020	R3	365	[M+H]+	InChI=1S/C30H53N3O6/c1-19(2)22(14-21-10-11-26(38-8)27(15-21)39-13-9-12-37-7)16-24(31)25(34)17-23(20(3)4)28(35)33-18-30(5,6)29(32)36/h10-11,15,19-20,22-25,34H,9,12-14,16-18,31H2,1-8H3,(H2,32,36)(H,33,35)/t22-,23-,24-,25-/m0/s1	UXOWGYHJODZGMF-QORCZRPOSA-N	3	0.18984	0.50235	0.526156	36.0805	Rhine	HMP/VMP
Aliskiren	173334-57-1	pos	2020	Sa	365	[M+H]+	InChI=1S/C30H53N3O6/c1-19(2)22(14-21-10-11-26(38-8)27(15-21)39-13-9-12-37-7)16-24(31)25(34)17-23(20(3)4)28(35)33-18-30(5,6)29(32)36/h10-11,15,19-20,22-25,34H,9,12-14,16-18,31H2,1-8H3,(H2,32,36)(H,33,35)/t22-,23-,24-,25-/m0/s1	UXOWGYHJODZGMF-QORCZRPOSA-N	3	0.260105	1.79538	1.8074	14.3911	Saale	HMP/VMP
Aliskiren	173334-57-1	pos	2020	S1	365	[M+H]+	InChI=1S/C30H53N3O6/c1-19(2)22(14-21-10-11-26(38-8)27(15-21)39-13-9-12-37-7)16-24(31)25(34)17-23(20(3)4)28(35)33-18-30(5,6)29(32)36/h10-11,15,19-20,22-25,34H,9,12-14,16-18,31H2,1-8H3,(H2,32,36)(H,33,35)/t22-,23-,24-,25-/m0/s1	UXOWGYHJODZGMF-QORCZRPOSA-N	3	0.0494086	0.336531	0.338817	14.5827	Saar	HMP/VMP
Aliskiren	173334-57-1	pos	2020	S2	365	[M+H]+	InChI=1S/C30H53N3O6/c1-19(2)22(14-21-10-11-26(38-8)27(15-21)39-13-9-12-37-7)16-24(31)25(34)17-23(20(3)4)28(35)33-18-30(5,6)29(32)36/h10-11,15,19-20,22-25,34H,9,12-14,16-18,31H2,1-8H3,(H2,32,36)(H,33,35)/t22-,23-,24-,25-/m0/s1	UXOWGYHJODZGMF-QORCZRPOSA-N	3	0.00481069	0.808229	0.808238	0.595206	Saar	HMP/VMP
Aliskiren	173334-57-1	pos	2021	D1	365	[M+H]+	InChI=1S/C30H53N3O6/c1-19(2)22(14-21-10-11-26(38-8)27(15-21)39-13-9-12-37-7)16-24(31)25(34)17-23(20(3)4)28(35)33-18-30(5,6)29(32)36/h10-11,15,19-20,22-25,34H,9,12-14,16-18,31H2,1-8H3,(H2,32,36)(H,33,35)/t22-,23-,24-,25-/m0/s1	UXOWGYHJODZGMF-QORCZRPOSA-N	3	0.00462782	0.0832795	0.083367	5.55114	Danube	HMP/VMP
Aliskiren	173334-57-1	pos	2021	E5	365	[M+H]+	InChI=1S/C30H53N3O6/c1-19(2)22(14-21-10-11-26(38-8)27(15-21)39-13-9-12-37-7)16-24(31)25(34)17-23(20(3)4)28(35)33-18-30(5,6)29(32)36/h10-11,15,19-20,22-25,34H,9,12-14,16-18,31H2,1-8H3,(H2,32,36)(H,33,35)/t22-,23-,24-,25-/m0/s1	UXOWGYHJODZGMF-QORCZRPOSA-N	3	0.0398614	0.338672	0.340228	11.7161	Elbe	HMP/VMP
Aliskiren	173334-57-1	pos	2021	E4	365	[M+H]+	InChI=1S/C30H53N3O6/c1-19(2)22(14-21-10-11-26(38-8)27(15-21)39-13-9-12-37-7)16-24(31)25(34)17-23(20(3)4)28(35)33-18-30(5,6)29(32)36/h10-11,15,19-20,22-25,34H,9,12-14,16-18,31H2,1-8H3,(H2,32,36)(H,33,35)/t22-,23-,24-,25-/m0/s1	UXOWGYHJODZGMF-QORCZRPOSA-N	3	0.0620991	0.507553	0.51019	12.1717	Elbe	HMP/VMP
Aliskiren	173334-57-1	pos	2021	Mu	365	[M+H]+	InChI=1S/C30H53N3O6/c1-19(2)22(14-21-10-11-26(38-8)27(15-21)39-13-9-12-37-7)16-24(31)25(34)17-23(20(3)4)28(35)33-18-30(5,6)29(32)36/h10-11,15,19-20,22-25,34H,9,12-14,16-18,31H2,1-8H3,(H2,32,36)(H,33,35)/t22-,23-,24-,25-/m0/s1	UXOWGYHJODZGMF-QORCZRPOSA-N	3	0.11892	2.42189	2.42385	4.90624	Mulde	HMP/VMP
Aliskiren	173334-57-1	pos	2021	R4	365	[M+H]+	InChI=1S/C30H53N3O6/c1-19(2)22(14-21-10-11-26(38-8)27(15-21)39-13-9-12-37-7)16-24(31)25(34)17-23(20(3)4)28(35)33-18-30(5,6)29(32)36/h10-11,15,19-20,22-25,34H,9,12-14,16-18,31H2,1-8H3,(H2,32,36)(H,33,35)/t22-,23-,24-,25-/m0/s1	UXOWGYHJODZGMF-QORCZRPOSA-N	3	0.0113465	0.659048	0.659113	1.72149	Rhine	HMP/VMP
Aliskiren	173334-57-1	pos	2021	R3	365	[M+H]+	InChI=1S/C30H53N3O6/c1-19(2)22(14-21-10-11-26(38-8)27(15-21)39-13-9-12-37-7)16-24(31)25(34)17-23(20(3)4)28(35)33-18-30(5,6)29(32)36/h10-11,15,19-20,22-25,34H,9,12-14,16-18,31H2,1-8H3,(H2,32,36)(H,33,35)/t22-,23-,24-,25-/m0/s1	UXOWGYHJODZGMF-QORCZRPOSA-N	3	0.0574335	0.712399	0.713902	8.04501	Rhine	HMP/VMP
Aliskiren	173334-57-1	pos	2021	R1	365	[M+H]+	InChI=1S/C30H53N3O6/c1-19(2)22(14-21-10-11-26(38-8)27(15-21)39-13-9-12-37-7)16-24(31)25(34)17-23(20(3)4)28(35)33-18-30(5,6)29(32)36/h10-11,15,19-20,22-25,34H,9,12-14,16-18,31H2,1-8H3,(H2,32,36)(H,33,35)/t22-,23-,24-,25-/m0/s1	UXOWGYHJODZGMF-QORCZRPOSA-N	2	0.00412501	0.0922178	0.0922639	4.47088	Rhine	HMP/VMP
Aliskiren	173334-57-1	pos	2021	Sa	365	[M+H]+	InChI=1S/C30H53N3O6/c1-19(2)22(14-21-10-11-26(38-8)27(15-21)39-13-9-12-37-7)16-24(31)25(34)17-23(20(3)4)28(35)33-18-30(5,6)29(32)36/h10-11,15,19-20,22-25,34H,9,12-14,16-18,31H2,1-8H3,(H2,32,36)(H,33,35)/t22-,23-,24-,25-/m0/s1	UXOWGYHJODZGMF-QORCZRPOSA-N	3	0.45542	3.16459	3.18733	14.2884	Saale	HMP/VMP
Aliskiren	173334-57-1	pos	2021	S1	365	[M+H]+	InChI=1S/C30H53N3O6/c1-19(2)22(14-21-10-11-26(38-8)27(15-21)39-13-9-12-37-7)16-24(31)25(34)17-23(20(3)4)28(35)33-18-30(5,6)29(32)36/h10-11,15,19-20,22-25,34H,9,12-14,16-18,31H2,1-8H3,(H2,32,36)(H,33,35)/t22-,23-,24-,25-/m0/s1	UXOWGYHJODZGMF-QORCZRPOSA-N	3	0.235595	0.406864	0.445545	52.878	Saar	HMP/VMP
Aliskiren	173334-57-1	pos	2021	S2	365	[M+H]+	InChI=1S/C30H53N3O6/c1-19(2)22(14-21-10-11-26(38-8)27(15-21)39-13-9-12-37-7)16-24(31)25(34)17-23(20(3)4)28(35)33-18-30(5,6)29(32)36/h10-11,15,19-20,22-25,34H,9,12-14,16-18,31H2,1-8H3,(H2,32,36)(H,33,35)/t22-,23-,24-,25-/m0/s1	UXOWGYHJODZGMF-QORCZRPOSA-N	3	0.246402	1.23693	1.25231	19.6758	Saar	HMP/VMP
Aliskiren	173334-57-1	pos	2022	D1	365	[M+H]+	InChI=1S/C30H53N3O6/c1-19(2)22(14-21-10-11-26(38-8)27(15-21)39-13-9-12-37-7)16-24(31)25(34)17-23(20(3)4)28(35)33-18-30(5,6)29(32)36/h10-11,15,19-20,22-25,34H,9,12-14,16-18,31H2,1-8H3,(H2,32,36)(H,33,35)/t22-,23-,24-,25-/m0/s1	UXOWGYHJODZGMF-QORCZRPOSA-N	3	0.0102104	0.0836629	0.0840792	12.1438	Danube	HMP/VMP
Aliskiren	173334-57-1	pos	2022	E5	365	[M+H]+	InChI=1S/C30H53N3O6/c1-19(2)22(14-21-10-11-26(38-8)27(15-21)39-13-9-12-37-7)16-24(31)25(34)17-23(20(3)4)28(35)33-18-30(5,6)29(32)36/h10-11,15,19-20,22-25,34H,9,12-14,16-18,31H2,1-8H3,(H2,32,36)(H,33,35)/t22-,23-,24-,25-/m0/s1	UXOWGYHJODZGMF-QORCZRPOSA-N	3	0.00896023	0.125165	0.125378	7.14655	Elbe	HMP/VMP
Aliskiren	173334-57-1	pos	2022	E4	365	[M+H]+	InChI=1S/C30H53N3O6/c1-19(2)22(14-21-10-11-26(38-8)27(15-21)39-13-9-12-37-7)16-24(31)25(34)17-23(20(3)4)28(35)33-18-30(5,6)29(32)36/h10-11,15,19-20,22-25,34H,9,12-14,16-18,31H2,1-8H3,(H2,32,36)(H,33,35)/t22-,23-,24-,25-/m0/s1	UXOWGYHJODZGMF-QORCZRPOSA-N	2	0.100921	0.629832	0.633862	15.9216	Elbe	HMP/VMP
Aliskiren	173334-57-1	pos	2022	Mu	365	[M+H]+	InChI=1S/C30H53N3O6/c1-19(2)22(14-21-10-11-26(38-8)27(15-21)39-13-9-12-37-7)16-24(31)25(34)17-23(20(3)4)28(35)33-18-30(5,6)29(32)36/h10-11,15,19-20,22-25,34H,9,12-14,16-18,31H2,1-8H3,(H2,32,36)(H,33,35)/t22-,23-,24-,25-/m0/s1	UXOWGYHJODZGMF-QORCZRPOSA-N	3	0.0171488	0.174333	0.174897	9.80507	Mulde	HMP/VMP
Aliskiren	173334-57-1	pos	2022	R4	365	[M+H]+	InChI=1S/C30H53N3O6/c1-19(2)22(14-21-10-11-26(38-8)27(15-21)39-13-9-12-37-7)16-24(31)25(34)17-23(20(3)4)28(35)33-18-30(5,6)29(32)36/h10-11,15,19-20,22-25,34H,9,12-14,16-18,31H2,1-8H3,(H2,32,36)(H,33,35)/t22-,23-,24-,25-/m0/s1	UXOWGYHJODZGMF-QORCZRPOSA-N	3	0.0188312	0.172822	0.173513	10.8529	Rhine	HMP/VMP
Aliskiren	173334-57-1	pos	2022	R3	365	[M+H]+	InChI=1S/C30H53N3O6/c1-19(2)22(14-21-10-11-26(38-8)27(15-21)39-13-9-12-37-7)16-24(31)25(34)17-23(20(3)4)28(35)33-18-30(5,6)29(32)36/h10-11,15,19-20,22-25,34H,9,12-14,16-18,31H2,1-8H3,(H2,32,36)(H,33,35)/t22-,23-,24-,25-/m0/s1	UXOWGYHJODZGMF-QORCZRPOSA-N	3	0.0115654	0.220121	0.220327	5.24922	Rhine	HMP/VMP
Aliskiren	173334-57-1	pos	2022	R1	365	[M+H]+	InChI=1S/C30H53N3O6/c1-19(2)22(14-21-10-11-26(38-8)27(15-21)39-13-9-12-37-7)16-24(31)25(34)17-23(20(3)4)28(35)33-18-30(5,6)29(32)36/h10-11,15,19-20,22-25,34H,9,12-14,16-18,31H2,1-8H3,(H2,32,36)(H,33,35)/t22-,23-,24-,25-/m0/s1	UXOWGYHJODZGMF-QORCZRPOSA-N	3	0.00425394	0.122476	0.122525	3.4719	Rhine	HMP/VMP
Aliskiren	173334-57-1	pos	2022	Sa	365	[M+H]+	InChI=1S/C30H53N3O6/c1-19(2)22(14-21-10-11-26(38-8)27(15-21)39-13-9-12-37-7)16-24(31)25(34)17-23(20(3)4)28(35)33-18-30(5,6)29(32)36/h10-11,15,19-20,22-25,34H,9,12-14,16-18,31H2,1-8H3,(H2,32,36)(H,33,35)/t22-,23-,24-,25-/m0/s1	UXOWGYHJODZGMF-QORCZRPOSA-N	3	0.0106857	0.81517	0.815217	1.31078	Saale	HMP/VMP
Aliskiren	173334-57-1	pos	2022	S1	365	[M+H]+	InChI=1S/C30H53N3O6/c1-19(2)22(14-21-10-11-26(38-8)27(15-21)39-13-9-12-37-7)16-24(31)25(34)17-23(20(3)4)28(35)33-18-30(5,6)29(32)36/h10-11,15,19-20,22-25,34H,9,12-14,16-18,31H2,1-8H3,(H2,32,36)(H,33,35)/t22-,23-,24-,25-/m0/s1	UXOWGYHJODZGMF-QORCZRPOSA-N	3	0.0353978	0.180424	0.18257	19.3886	Saar	HMP/VMP
Aliskiren	173334-57-1	pos	2022	S2	365	[M+H]+	InChI=1S/C30H53N3O6/c1-19(2)22(14-21-10-11-26(38-8)27(15-21)39-13-9-12-37-7)16-24(31)25(34)17-23(20(3)4)28(35)33-18-30(5,6)29(32)36/h10-11,15,19-20,22-25,34H,9,12-14,16-18,31H2,1-8H3,(H2,32,36)(H,33,35)/t22-,23-,24-,25-/m0/s1	UXOWGYHJODZGMF-QORCZRPOSA-N	3	0.00932502	0.317473	0.317565	2.93641	Saar	HMP/VMP
Amisulpride	71675-85-9	pos	2005	E5	365	[M+H]+	InChI=1S/C17H27N3O4S/c1-4-20-8-6-7-12(20)11-19-17(21)13-9-16(25(22,23)5-2)14(18)10-15(13)24-3/h9-10,12H,4-8,11,18H2,1-3H3,(H,19,21)	NTJOBXMMWNYJFB-UHFFFAOYSA-N	3	0.543807	1.22904	1.31394	41.3875	Elbe	HMP/VMP
Amisulpride	71675-85-9	pos	2005	E4	365	[M+H]+	InChI=1S/C17H27N3O4S/c1-4-20-8-6-7-12(20)11-19-17(21)13-9-16(25(22,23)5-2)14(18)10-15(13)24-3/h9-10,12H,4-8,11,18H2,1-3H3,(H,19,21)	NTJOBXMMWNYJFB-UHFFFAOYSA-N	3	0.125254	0.925893	0.931545	13.4458	Elbe	HMP/VMP
Amisulpride	71675-85-9	pos	2005	E1	365	[M+H]+	InChI=1S/C17H27N3O4S/c1-4-20-8-6-7-12(20)11-19-17(21)13-9-16(25(22,23)5-2)14(18)10-15(13)24-3/h9-10,12H,4-8,11,18H2,1-3H3,(H,19,21)	NTJOBXMMWNYJFB-UHFFFAOYSA-N	3	0.0703457	0.710012	0.712384	9.87469	Elbe	HMP/VMP
Amisulpride	71675-85-9	pos	2005	E2	365	[M+H]+	InChI=1S/C17H27N3O4S/c1-4-20-8-6-7-12(20)11-19-17(21)13-9-16(25(22,23)5-2)14(18)10-15(13)24-3/h9-10,12H,4-8,11,18H2,1-3H3,(H,19,21)	NTJOBXMMWNYJFB-UHFFFAOYSA-N	3	0.257239	2.01072	2.02194	12.7224	Elbe	HMP/VMP
Amisulpride	71675-85-9	pos	2005	Mu	365	[M+H]+	InChI=1S/C17H27N3O4S/c1-4-20-8-6-7-12(20)11-19-17(21)13-9-16(25(22,23)5-2)14(18)10-15(13)24-3/h9-10,12H,4-8,11,18H2,1-3H3,(H,19,21)	NTJOBXMMWNYJFB-UHFFFAOYSA-N	3	0.349238	0.902214	0.953509	36.6266	Mulde	HMP/VMP
Amisulpride	71675-85-9	pos	2005	R4	365	[M+H]+	InChI=1S/C17H27N3O4S/c1-4-20-8-6-7-12(20)11-19-17(21)13-9-16(25(22,23)5-2)14(18)10-15(13)24-3/h9-10,12H,4-8,11,18H2,1-3H3,(H,19,21)	NTJOBXMMWNYJFB-UHFFFAOYSA-N	3	0.0186278	1.12638	1.12648	1.65362	Rhine	HMP/VMP
Amisulpride	71675-85-9	pos	2005	R3	365	[M+H]+	InChI=1S/C17H27N3O4S/c1-4-20-8-6-7-12(20)11-19-17(21)13-9-16(25(22,23)5-2)14(18)10-15(13)24-3/h9-10,12H,4-8,11,18H2,1-3H3,(H,19,21)	NTJOBXMMWNYJFB-UHFFFAOYSA-N	3	0.116215	0.700909	0.707729	16.4209	Rhine	HMP/VMP
Amisulpride	71675-85-9	pos	2005	Sa	365	[M+H]+	InChI=1S/C17H27N3O4S/c1-4-20-8-6-7-12(20)11-19-17(21)13-9-16(25(22,23)5-2)14(18)10-15(13)24-3/h9-10,12H,4-8,11,18H2,1-3H3,(H,19,21)	NTJOBXMMWNYJFB-UHFFFAOYSA-N	3	0.838392	3.36378	3.43887	24.3799	Saale	HMP/VMP
Amisulpride	71675-85-9	pos	2006	E5	365	[M+H]+	InChI=1S/C17H27N3O4S/c1-4-20-8-6-7-12(20)11-19-17(21)13-9-16(25(22,23)5-2)14(18)10-15(13)24-3/h9-10,12H,4-8,11,18H2,1-3H3,(H,19,21)	NTJOBXMMWNYJFB-UHFFFAOYSA-N	3	0.244209	3.55848	3.56399	6.85211	Elbe	HMP/VMP
Amisulpride	71675-85-9	pos	2006	E4	365	[M+H]+	InChI=1S/C17H27N3O4S/c1-4-20-8-6-7-12(20)11-19-17(21)13-9-16(25(22,23)5-2)14(18)10-15(13)24-3/h9-10,12H,4-8,11,18H2,1-3H3,(H,19,21)	NTJOBXMMWNYJFB-UHFFFAOYSA-N	3	0.0862079	1.00683	1.00937	8.54075	Elbe	HMP/VMP
Amisulpride	71675-85-9	pos	2006	E1	365	[M+H]+	InChI=1S/C17H27N3O4S/c1-4-20-8-6-7-12(20)11-19-17(21)13-9-16(25(22,23)5-2)14(18)10-15(13)24-3/h9-10,12H,4-8,11,18H2,1-3H3,(H,19,21)	NTJOBXMMWNYJFB-UHFFFAOYSA-N	3	0.159499	0.928024	0.937082	17.0208	Elbe	HMP/VMP
Amisulpride	71675-85-9	pos	2006	E2	365	[M+H]+	InChI=1S/C17H27N3O4S/c1-4-20-8-6-7-12(20)11-19-17(21)13-9-16(25(22,23)5-2)14(18)10-15(13)24-3/h9-10,12H,4-8,11,18H2,1-3H3,(H,19,21)	NTJOBXMMWNYJFB-UHFFFAOYSA-N	3	0.163808	1.55011	1.55597	10.5277	Elbe	HMP/VMP
Amisulpride	71675-85-9	pos	2006	Mu	365	[M+H]+	InChI=1S/C17H27N3O4S/c1-4-20-8-6-7-12(20)11-19-17(21)13-9-16(25(22,23)5-2)14(18)10-15(13)24-3/h9-10,12H,4-8,11,18H2,1-3H3,(H,19,21)	NTJOBXMMWNYJFB-UHFFFAOYSA-N	3	0.46331	1.16865	1.23852	37.4083	Mulde	HMP/VMP
Amisulpride	71675-85-9	pos	2006	R4	365	[M+H]+	InChI=1S/C17H27N3O4S/c1-4-20-8-6-7-12(20)11-19-17(21)13-9-16(25(22,23)5-2)14(18)10-15(13)24-3/h9-10,12H,4-8,11,18H2,1-3H3,(H,19,21)	NTJOBXMMWNYJFB-UHFFFAOYSA-N	3	0.113241	1.47314	1.47612	7.67152	Rhine	HMP/VMP
Amisulpride	71675-85-9	pos	2006	R3	365	[M+H]+	InChI=1S/C17H27N3O4S/c1-4-20-8-6-7-12(20)11-19-17(21)13-9-16(25(22,23)5-2)14(18)10-15(13)24-3/h9-10,12H,4-8,11,18H2,1-3H3,(H,19,21)	NTJOBXMMWNYJFB-UHFFFAOYSA-N	3	0.0394137	0.957371	0.957906	4.11456	Rhine	HMP/VMP
Amisulpride	71675-85-9	pos	2006	S1	365	[M+H]+	InChI=1S/C17H27N3O4S/c1-4-20-8-6-7-12(20)11-19-17(21)13-9-16(25(22,23)5-2)14(18)10-15(13)24-3/h9-10,12H,4-8,11,18H2,1-3H3,(H,19,21)	NTJOBXMMWNYJFB-UHFFFAOYSA-N	3	0.662138	1.85197	1.93832	34.1603	Saar	HMP/VMP
Amisulpride	71675-85-9	pos	2006	S2	365	[M+H]+	InChI=1S/C17H27N3O4S/c1-4-20-8-6-7-12(20)11-19-17(21)13-9-16(25(22,23)5-2)14(18)10-15(13)24-3/h9-10,12H,4-8,11,18H2,1-3H3,(H,19,21)	NTJOBXMMWNYJFB-UHFFFAOYSA-N	3	0.213231	2.86025	2.8657	7.44078	Saar	HMP/VMP
Amisulpride	71675-85-9	pos	2007	E5	365	[M+H]+	InChI=1S/C17H27N3O4S/c1-4-20-8-6-7-12(20)11-19-17(21)13-9-16(25(22,23)5-2)14(18)10-15(13)24-3/h9-10,12H,4-8,11,18H2,1-3H3,(H,19,21)	NTJOBXMMWNYJFB-UHFFFAOYSA-N	3	0.0969305	3.02995	3.03097	3.198	Elbe	HMP/VMP
Amisulpride	71675-85-9	pos	2007	E4	365	[M+H]+	InChI=1S/C17H27N3O4S/c1-4-20-8-6-7-12(20)11-19-17(21)13-9-16(25(22,23)5-2)14(18)10-15(13)24-3/h9-10,12H,4-8,11,18H2,1-3H3,(H,19,21)	NTJOBXMMWNYJFB-UHFFFAOYSA-N	3	0.215747	1.39628	1.40675	15.3366	Elbe	HMP/VMP
Amisulpride	71675-85-9	pos	2007	E1	365	[M+H]+	InChI=1S/C17H27N3O4S/c1-4-20-8-6-7-12(20)11-19-17(21)13-9-16(25(22,23)5-2)14(18)10-15(13)24-3/h9-10,12H,4-8,11,18H2,1-3H3,(H,19,21)	NTJOBXMMWNYJFB-UHFFFAOYSA-N	3	0.457486	1.52099	1.57102	29.1204	Elbe	HMP/VMP
Amisulpride	71675-85-9	pos	2007	E2	365	[M+H]+	InChI=1S/C17H27N3O4S/c1-4-20-8-6-7-12(20)11-19-17(21)13-9-16(25(22,23)5-2)14(18)10-15(13)24-3/h9-10,12H,4-8,11,18H2,1-3H3,(H,19,21)	NTJOBXMMWNYJFB-UHFFFAOYSA-N	3	0.210643	3.63179	3.63586	5.79348	Elbe	HMP/VMP
Amisulpride	71675-85-9	pos	2007	Mu	365	[M+H]+	InChI=1S/C17H27N3O4S/c1-4-20-8-6-7-12(20)11-19-17(21)13-9-16(25(22,23)5-2)14(18)10-15(13)24-3/h9-10,12H,4-8,11,18H2,1-3H3,(H,19,21)	NTJOBXMMWNYJFB-UHFFFAOYSA-N	3	0.579158	1.45723	1.54152	37.5705	Mulde	HMP/VMP
Amisulpride	71675-85-9	pos	2007	R4	365	[M+H]+	InChI=1S/C17H27N3O4S/c1-4-20-8-6-7-12(20)11-19-17(21)13-9-16(25(22,23)5-2)14(18)10-15(13)24-3/h9-10,12H,4-8,11,18H2,1-3H3,(H,19,21)	NTJOBXMMWNYJFB-UHFFFAOYSA-N	3	0.0831575	1.44689	1.44845	5.74114	Rhine	HMP/VMP
Amisulpride	71675-85-9	pos	2007	R3	365	[M+H]+	InChI=1S/C17H27N3O4S/c1-4-20-8-6-7-12(20)11-19-17(21)13-9-16(25(22,23)5-2)14(18)10-15(13)24-3/h9-10,12H,4-8,11,18H2,1-3H3,(H,19,21)	NTJOBXMMWNYJFB-UHFFFAOYSA-N	3	0.258106	0.923943	0.946431	27.2715	Rhine	HMP/VMP
Amisulpride	71675-85-9	pos	2007	Sa	365	[M+H]+	InChI=1S/C17H27N3O4S/c1-4-20-8-6-7-12(20)11-19-17(21)13-9-16(25(22,23)5-2)14(18)10-15(13)24-3/h9-10,12H,4-8,11,18H2,1-3H3,(H,19,21)	NTJOBXMMWNYJFB-UHFFFAOYSA-N	3	0.566711	2.25909	2.30225	24.6156	Saale	HMP/VMP
Amisulpride	71675-85-9	pos	2007	S1	365	[M+H]+	InChI=1S/C17H27N3O4S/c1-4-20-8-6-7-12(20)11-19-17(21)13-9-16(25(22,23)5-2)14(18)10-15(13)24-3/h9-10,12H,4-8,11,18H2,1-3H3,(H,19,21)	NTJOBXMMWNYJFB-UHFFFAOYSA-N	3	0.797635	1.91757	2.03924	39.1143	Saar	HMP/VMP
Amisulpride	71675-85-9	pos	2007	S2	365	[M+H]+	InChI=1S/C17H27N3O4S/c1-4-20-8-6-7-12(20)11-19-17(21)13-9-16(25(22,23)5-2)14(18)10-15(13)24-3/h9-10,12H,4-8,11,18H2,1-3H3,(H,19,21)	NTJOBXMMWNYJFB-UHFFFAOYSA-N	3	0.0565276	3.04838	3.04874	1.85413	Saar	HMP/VMP
Amisulpride	71675-85-9	pos	2008	E5	365	[M+H]+	InChI=1S/C17H27N3O4S/c1-4-20-8-6-7-12(20)11-19-17(21)13-9-16(25(22,23)5-2)14(18)10-15(13)24-3/h9-10,12H,4-8,11,18H2,1-3H3,(H,19,21)	NTJOBXMMWNYJFB-UHFFFAOYSA-N	3	0.23266	2.91757	2.92373	7.95764	Elbe	HMP/VMP
Amisulpride	71675-85-9	pos	2008	E4	365	[M+H]+	InChI=1S/C17H27N3O4S/c1-4-20-8-6-7-12(20)11-19-17(21)13-9-16(25(22,23)5-2)14(18)10-15(13)24-3/h9-10,12H,4-8,11,18H2,1-3H3,(H,19,21)	NTJOBXMMWNYJFB-UHFFFAOYSA-N	3	0.111618	1.52989	1.53254	7.28321	Elbe	HMP/VMP
Amisulpride	71675-85-9	pos	2008	E1	365	[M+H]+	InChI=1S/C17H27N3O4S/c1-4-20-8-6-7-12(20)11-19-17(21)13-9-16(25(22,23)5-2)14(18)10-15(13)24-3/h9-10,12H,4-8,11,18H2,1-3H3,(H,19,21)	NTJOBXMMWNYJFB-UHFFFAOYSA-N	3	0.167447	1.45743	1.46362	11.4406	Elbe	HMP/VMP
Amisulpride	71675-85-9	pos	2008	E2	365	[M+H]+	InChI=1S/C17H27N3O4S/c1-4-20-8-6-7-12(20)11-19-17(21)13-9-16(25(22,23)5-2)14(18)10-15(13)24-3/h9-10,12H,4-8,11,18H2,1-3H3,(H,19,21)	NTJOBXMMWNYJFB-UHFFFAOYSA-N	3	0.23713	3.18303	3.18895	7.436	Elbe	HMP/VMP
Amisulpride	71675-85-9	pos	2008	Mu	365	[M+H]+	InChI=1S/C17H27N3O4S/c1-4-20-8-6-7-12(20)11-19-17(21)13-9-16(25(22,23)5-2)14(18)10-15(13)24-3/h9-10,12H,4-8,11,18H2,1-3H3,(H,19,21)	NTJOBXMMWNYJFB-UHFFFAOYSA-N	3	0.267062	1.10641	1.12984	23.6373	Mulde	HMP/VMP
Amisulpride	71675-85-9	pos	2008	R4	365	[M+H]+	InChI=1S/C17H27N3O4S/c1-4-20-8-6-7-12(20)11-19-17(21)13-9-16(25(22,23)5-2)14(18)10-15(13)24-3/h9-10,12H,4-8,11,18H2,1-3H3,(H,19,21)	NTJOBXMMWNYJFB-UHFFFAOYSA-N	3	0.148666	1.11417	1.12049	13.268	Rhine	HMP/VMP
Amisulpride	71675-85-9	pos	2008	R3	365	[M+H]+	InChI=1S/C17H27N3O4S/c1-4-20-8-6-7-12(20)11-19-17(21)13-9-16(25(22,23)5-2)14(18)10-15(13)24-3/h9-10,12H,4-8,11,18H2,1-3H3,(H,19,21)	NTJOBXMMWNYJFB-UHFFFAOYSA-N	3	0.208552	1.10725	1.12127	18.5995	Rhine	HMP/VMP
Amisulpride	71675-85-9	pos	2008	Sa	365	[M+H]+	InChI=1S/C17H27N3O4S/c1-4-20-8-6-7-12(20)11-19-17(21)13-9-16(25(22,23)5-2)14(18)10-15(13)24-3/h9-10,12H,4-8,11,18H2,1-3H3,(H,19,21)	NTJOBXMMWNYJFB-UHFFFAOYSA-N	3	0.541425	2.43006	2.47291	21.8943	Saale	HMP/VMP
Amisulpride	71675-85-9	pos	2008	S1	365	[M+H]+	InChI=1S/C17H27N3O4S/c1-4-20-8-6-7-12(20)11-19-17(21)13-9-16(25(22,23)5-2)14(18)10-15(13)24-3/h9-10,12H,4-8,11,18H2,1-3H3,(H,19,21)	NTJOBXMMWNYJFB-UHFFFAOYSA-N	3	1.4723	2.4979	2.84289	51.7889	Saar	HMP/VMP
Amisulpride	71675-85-9	pos	2008	S2	365	[M+H]+	InChI=1S/C17H27N3O4S/c1-4-20-8-6-7-12(20)11-19-17(21)13-9-16(25(22,23)5-2)14(18)10-15(13)24-3/h9-10,12H,4-8,11,18H2,1-3H3,(H,19,21)	NTJOBXMMWNYJFB-UHFFFAOYSA-N	3	0.414127	3.10497	3.12428	13.2551	Saar	HMP/VMP
Amisulpride	71675-85-9	pos	2009	D3	365	[M+H]+	InChI=1S/C17H27N3O4S/c1-4-20-8-6-7-12(20)11-19-17(21)13-9-16(25(22,23)5-2)14(18)10-15(13)24-3/h9-10,12H,4-8,11,18H2,1-3H3,(H,19,21)	NTJOBXMMWNYJFB-UHFFFAOYSA-N	3	0.142639	0.66186	0.672651	21.2055	Danube	HMP/VMP
Amisulpride	71675-85-9	pos	2009	D1	365	[M+H]+	InChI=1S/C17H27N3O4S/c1-4-20-8-6-7-12(20)11-19-17(21)13-9-16(25(22,23)5-2)14(18)10-15(13)24-3/h9-10,12H,4-8,11,18H2,1-3H3,(H,19,21)	NTJOBXMMWNYJFB-UHFFFAOYSA-N	3	0.393896	1.11034	1.16295	33.8703	Danube	HMP/VMP
Amisulpride	71675-85-9	pos	2009	E5	365	[M+H]+	InChI=1S/C17H27N3O4S/c1-4-20-8-6-7-12(20)11-19-17(21)13-9-16(25(22,23)5-2)14(18)10-15(13)24-3/h9-10,12H,4-8,11,18H2,1-3H3,(H,19,21)	NTJOBXMMWNYJFB-UHFFFAOYSA-N	3	0.13319	3.6133	3.61494	3.68442	Elbe	HMP/VMP
Amisulpride	71675-85-9	pos	2009	E4	365	[M+H]+	InChI=1S/C17H27N3O4S/c1-4-20-8-6-7-12(20)11-19-17(21)13-9-16(25(22,23)5-2)14(18)10-15(13)24-3/h9-10,12H,4-8,11,18H2,1-3H3,(H,19,21)	NTJOBXMMWNYJFB-UHFFFAOYSA-N	3	0.0899222	1.45698	1.4588	6.16414	Elbe	HMP/VMP
Amisulpride	71675-85-9	pos	2009	E1	365	[M+H]+	InChI=1S/C17H27N3O4S/c1-4-20-8-6-7-12(20)11-19-17(21)13-9-16(25(22,23)5-2)14(18)10-15(13)24-3/h9-10,12H,4-8,11,18H2,1-3H3,(H,19,21)	NTJOBXMMWNYJFB-UHFFFAOYSA-N	3	0.119376	1.70349	1.70621	6.99653	Elbe	HMP/VMP
Amisulpride	71675-85-9	pos	2009	E2	365	[M+H]+	InChI=1S/C17H27N3O4S/c1-4-20-8-6-7-12(20)11-19-17(21)13-9-16(25(22,23)5-2)14(18)10-15(13)24-3/h9-10,12H,4-8,11,18H2,1-3H3,(H,19,21)	NTJOBXMMWNYJFB-UHFFFAOYSA-N	3	0.221819	3.38391	3.38884	6.54559	Elbe	HMP/VMP
Amisulpride	71675-85-9	pos	2009	Mu	365	[M+H]+	InChI=1S/C17H27N3O4S/c1-4-20-8-6-7-12(20)11-19-17(21)13-9-16(25(22,23)5-2)14(18)10-15(13)24-3/h9-10,12H,4-8,11,18H2,1-3H3,(H,19,21)	NTJOBXMMWNYJFB-UHFFFAOYSA-N	3	1.06318	1.80616	2.01773	52.6916	Mulde	HMP/VMP
Amisulpride	71675-85-9	pos	2009	R4	365	[M+H]+	InChI=1S/C17H27N3O4S/c1-4-20-8-6-7-12(20)11-19-17(21)13-9-16(25(22,23)5-2)14(18)10-15(13)24-3/h9-10,12H,4-8,11,18H2,1-3H3,(H,19,21)	NTJOBXMMWNYJFB-UHFFFAOYSA-N	3	0.0914831	1.43135	1.43333	6.38255	Rhine	HMP/VMP
Amisulpride	71675-85-9	pos	2009	R3	365	[M+H]+	InChI=1S/C17H27N3O4S/c1-4-20-8-6-7-12(20)11-19-17(21)13-9-16(25(22,23)5-2)14(18)10-15(13)24-3/h9-10,12H,4-8,11,18H2,1-3H3,(H,19,21)	NTJOBXMMWNYJFB-UHFFFAOYSA-N	3	0.302525	1.23183	1.25831	24.0422	Rhine	HMP/VMP
Amisulpride	71675-85-9	pos	2009	Sa	365	[M+H]+	InChI=1S/C17H27N3O4S/c1-4-20-8-6-7-12(20)11-19-17(21)13-9-16(25(22,23)5-2)14(18)10-15(13)24-3/h9-10,12H,4-8,11,18H2,1-3H3,(H,19,21)	NTJOBXMMWNYJFB-UHFFFAOYSA-N	3	1.67504	4.30001	4.54093	36.8877	Saale	HMP/VMP
Amisulpride	71675-85-9	pos	2009	S1	365	[M+H]+	InChI=1S/C17H27N3O4S/c1-4-20-8-6-7-12(20)11-19-17(21)13-9-16(25(22,23)5-2)14(18)10-15(13)24-3/h9-10,12H,4-8,11,18H2,1-3H3,(H,19,21)	NTJOBXMMWNYJFB-UHFFFAOYSA-N	3	2.35133	3.52448	4.0837	57.5786	Saar	HMP/VMP
Amisulpride	71675-85-9	pos	2009	S2	365	[M+H]+	InChI=1S/C17H27N3O4S/c1-4-20-8-6-7-12(20)11-19-17(21)13-9-16(25(22,23)5-2)14(18)10-15(13)24-3/h9-10,12H,4-8,11,18H2,1-3H3,(H,19,21)	NTJOBXMMWNYJFB-UHFFFAOYSA-N	3	0.0986349	3.61158	3.61247	2.7304	Saar	HMP/VMP
Amisulpride	71675-85-9	pos	2010	D3	365	[M+H]+	InChI=1S/C17H27N3O4S/c1-4-20-8-6-7-12(20)11-19-17(21)13-9-16(25(22,23)5-2)14(18)10-15(13)24-3/h9-10,12H,4-8,11,18H2,1-3H3,(H,19,21)	NTJOBXMMWNYJFB-UHFFFAOYSA-N	3	0.0353129	0.761106	0.761644	4.6364	Danube	HMP/VMP
Amisulpride	71675-85-9	pos	2010	D1	365	[M+H]+	InChI=1S/C17H27N3O4S/c1-4-20-8-6-7-12(20)11-19-17(21)13-9-16(25(22,23)5-2)14(18)10-15(13)24-3/h9-10,12H,4-8,11,18H2,1-3H3,(H,19,21)	NTJOBXMMWNYJFB-UHFFFAOYSA-N	3	0.235338	0.978698	0.998348	23.5728	Danube	HMP/VMP
Amisulpride	71675-85-9	pos	2010	E5	365	[M+H]+	InChI=1S/C17H27N3O4S/c1-4-20-8-6-7-12(20)11-19-17(21)13-9-16(25(22,23)5-2)14(18)10-15(13)24-3/h9-10,12H,4-8,11,18H2,1-3H3,(H,19,21)	NTJOBXMMWNYJFB-UHFFFAOYSA-N	3	0.143208	2.46052	2.46326	5.81377	Elbe	HMP/VMP
Amisulpride	71675-85-9	pos	2010	E4	365	[M+H]+	InChI=1S/C17H27N3O4S/c1-4-20-8-6-7-12(20)11-19-17(21)13-9-16(25(22,23)5-2)14(18)10-15(13)24-3/h9-10,12H,4-8,11,18H2,1-3H3,(H,19,21)	NTJOBXMMWNYJFB-UHFFFAOYSA-N	3	0.387121	1.4213	1.46002	26.5148	Elbe	HMP/VMP
Amisulpride	71675-85-9	pos	2010	E1	365	[M+H]+	InChI=1S/C17H27N3O4S/c1-4-20-8-6-7-12(20)11-19-17(21)13-9-16(25(22,23)5-2)14(18)10-15(13)24-3/h9-10,12H,4-8,11,18H2,1-3H3,(H,19,21)	NTJOBXMMWNYJFB-UHFFFAOYSA-N	3	0.359271	1.36469	1.39895	25.6814	Elbe	HMP/VMP
Amisulpride	71675-85-9	pos	2010	E2	365	[M+H]+	InChI=1S/C17H27N3O4S/c1-4-20-8-6-7-12(20)11-19-17(21)13-9-16(25(22,23)5-2)14(18)10-15(13)24-3/h9-10,12H,4-8,11,18H2,1-3H3,(H,19,21)	NTJOBXMMWNYJFB-UHFFFAOYSA-N	3	0.209568	2.62721	2.63261	7.96048	Elbe	HMP/VMP
Amisulpride	71675-85-9	pos	2010	Mu	365	[M+H]+	InChI=1S/C17H27N3O4S/c1-4-20-8-6-7-12(20)11-19-17(21)13-9-16(25(22,23)5-2)14(18)10-15(13)24-3/h9-10,12H,4-8,11,18H2,1-3H3,(H,19,21)	NTJOBXMMWNYJFB-UHFFFAOYSA-N	3	1.10836	1.91599	2.16126	51.2829	Mulde	HMP/VMP
Amisulpride	71675-85-9	pos	2010	R4	365	[M+H]+	InChI=1S/C17H27N3O4S/c1-4-20-8-6-7-12(20)11-19-17(21)13-9-16(25(22,23)5-2)14(18)10-15(13)24-3/h9-10,12H,4-8,11,18H2,1-3H3,(H,19,21)	NTJOBXMMWNYJFB-UHFFFAOYSA-N	3	0.00686168	1.63512	1.63513	0.41964	Rhine	HMP/VMP
Amisulpride	71675-85-9	pos	2010	R3	365	[M+H]+	InChI=1S/C17H27N3O4S/c1-4-20-8-6-7-12(20)11-19-17(21)13-9-16(25(22,23)5-2)14(18)10-15(13)24-3/h9-10,12H,4-8,11,18H2,1-3H3,(H,19,21)	NTJOBXMMWNYJFB-UHFFFAOYSA-N	3	0.0993747	0.921768	0.925465	10.7378	Rhine	HMP/VMP
Amisulpride	71675-85-9	pos	2010	Sa	365	[M+H]+	InChI=1S/C17H27N3O4S/c1-4-20-8-6-7-12(20)11-19-17(21)13-9-16(25(22,23)5-2)14(18)10-15(13)24-3/h9-10,12H,4-8,11,18H2,1-3H3,(H,19,21)	NTJOBXMMWNYJFB-UHFFFAOYSA-N	3	1.37287	3.14654	3.37703	40.6533	Saale	HMP/VMP
Amisulpride	71675-85-9	pos	2010	S1	365	[M+H]+	InChI=1S/C17H27N3O4S/c1-4-20-8-6-7-12(20)11-19-17(21)13-9-16(25(22,23)5-2)14(18)10-15(13)24-3/h9-10,12H,4-8,11,18H2,1-3H3,(H,19,21)	NTJOBXMMWNYJFB-UHFFFAOYSA-N	3	1.0408	2.36634	2.53851	41.0005	Saar	HMP/VMP
Amisulpride	71675-85-9	pos	2010	S2	365	[M+H]+	InChI=1S/C17H27N3O4S/c1-4-20-8-6-7-12(20)11-19-17(21)13-9-16(25(22,23)5-2)14(18)10-15(13)24-3/h9-10,12H,4-8,11,18H2,1-3H3,(H,19,21)	NTJOBXMMWNYJFB-UHFFFAOYSA-N	3	0.272865	3.11559	3.1233	8.73642	Saar	HMP/VMP
Amisulpride	71675-85-9	pos	2011	D3	365	[M+H]+	InChI=1S/C17H27N3O4S/c1-4-20-8-6-7-12(20)11-19-17(21)13-9-16(25(22,23)5-2)14(18)10-15(13)24-3/h9-10,12H,4-8,11,18H2,1-3H3,(H,19,21)	NTJOBXMMWNYJFB-UHFFFAOYSA-N	3	0.027715	0.542273	0.542754	5.10636	Danube	HMP/VMP
Amisulpride	71675-85-9	pos	2011	D1	365	[M+H]+	InChI=1S/C17H27N3O4S/c1-4-20-8-6-7-12(20)11-19-17(21)13-9-16(25(22,23)5-2)14(18)10-15(13)24-3/h9-10,12H,4-8,11,18H2,1-3H3,(H,19,21)	NTJOBXMMWNYJFB-UHFFFAOYSA-N	3	0.336717	1.07631	1.11518	30.194	Danube	HMP/VMP
Amisulpride	71675-85-9	pos	2011	E5	365	[M+H]+	InChI=1S/C17H27N3O4S/c1-4-20-8-6-7-12(20)11-19-17(21)13-9-16(25(22,23)5-2)14(18)10-15(13)24-3/h9-10,12H,4-8,11,18H2,1-3H3,(H,19,21)	NTJOBXMMWNYJFB-UHFFFAOYSA-N	3	0.0943363	2.57763	2.57877	3.65819	Elbe	HMP/VMP
Amisulpride	71675-85-9	pos	2011	E4	365	[M+H]+	InChI=1S/C17H27N3O4S/c1-4-20-8-6-7-12(20)11-19-17(21)13-9-16(25(22,23)5-2)14(18)10-15(13)24-3/h9-10,12H,4-8,11,18H2,1-3H3,(H,19,21)	NTJOBXMMWNYJFB-UHFFFAOYSA-N	3	0.251612	1.03123	1.05356	23.8821	Elbe	HMP/VMP
Amisulpride	71675-85-9	pos	2011	E1	365	[M+H]+	InChI=1S/C17H27N3O4S/c1-4-20-8-6-7-12(20)11-19-17(21)13-9-16(25(22,23)5-2)14(18)10-15(13)24-3/h9-10,12H,4-8,11,18H2,1-3H3,(H,19,21)	NTJOBXMMWNYJFB-UHFFFAOYSA-N	3	0.0752617	0.929986	0.932013	8.07518	Elbe	HMP/VMP
Amisulpride	71675-85-9	pos	2011	E2	365	[M+H]+	InChI=1S/C17H27N3O4S/c1-4-20-8-6-7-12(20)11-19-17(21)13-9-16(25(22,23)5-2)14(18)10-15(13)24-3/h9-10,12H,4-8,11,18H2,1-3H3,(H,19,21)	NTJOBXMMWNYJFB-UHFFFAOYSA-N	3	0.15181	1.73656	1.74094	8.72002	Elbe	HMP/VMP
Amisulpride	71675-85-9	pos	2011	Mu	365	[M+H]+	InChI=1S/C17H27N3O4S/c1-4-20-8-6-7-12(20)11-19-17(21)13-9-16(25(22,23)5-2)14(18)10-15(13)24-3/h9-10,12H,4-8,11,18H2,1-3H3,(H,19,21)	NTJOBXMMWNYJFB-UHFFFAOYSA-N	3	1.15642	0.951854	1.49771	77.2125	Mulde	HMP/VMP
Amisulpride	71675-85-9	pos	2011	R4	365	[M+H]+	InChI=1S/C17H27N3O4S/c1-4-20-8-6-7-12(20)11-19-17(21)13-9-16(25(22,23)5-2)14(18)10-15(13)24-3/h9-10,12H,4-8,11,18H2,1-3H3,(H,19,21)	NTJOBXMMWNYJFB-UHFFFAOYSA-N	3	0.125268	1.34148	1.34535	9.31123	Rhine	HMP/VMP
Amisulpride	71675-85-9	pos	2011	R3	365	[M+H]+	InChI=1S/C17H27N3O4S/c1-4-20-8-6-7-12(20)11-19-17(21)13-9-16(25(22,23)5-2)14(18)10-15(13)24-3/h9-10,12H,4-8,11,18H2,1-3H3,(H,19,21)	NTJOBXMMWNYJFB-UHFFFAOYSA-N	3	0.0669095	1.16703	1.16831	5.72703	Rhine	HMP/VMP
Amisulpride	71675-85-9	pos	2011	Sa	365	[M+H]+	InChI=1S/C17H27N3O4S/c1-4-20-8-6-7-12(20)11-19-17(21)13-9-16(25(22,23)5-2)14(18)10-15(13)24-3/h9-10,12H,4-8,11,18H2,1-3H3,(H,19,21)	NTJOBXMMWNYJFB-UHFFFAOYSA-N	3	1.96702	4.23202	4.58632	42.8889	Saale	HMP/VMP
Amisulpride	71675-85-9	pos	2011	S1	365	[M+H]+	InChI=1S/C17H27N3O4S/c1-4-20-8-6-7-12(20)11-19-17(21)13-9-16(25(22,23)5-2)14(18)10-15(13)24-3/h9-10,12H,4-8,11,18H2,1-3H3,(H,19,21)	NTJOBXMMWNYJFB-UHFFFAOYSA-N	3	1.14582	3.16346	3.3086	34.6316	Saar	HMP/VMP
Amisulpride	71675-85-9	pos	2011	S2	365	[M+H]+	InChI=1S/C17H27N3O4S/c1-4-20-8-6-7-12(20)11-19-17(21)13-9-16(25(22,23)5-2)14(18)10-15(13)24-3/h9-10,12H,4-8,11,18H2,1-3H3,(H,19,21)	NTJOBXMMWNYJFB-UHFFFAOYSA-N	3	0.0809772	3.29114	3.29181	2.45996	Saar	HMP/VMP
Amisulpride	71675-85-9	pos	2012	D3	365	[M+H]+	InChI=1S/C17H27N3O4S/c1-4-20-8-6-7-12(20)11-19-17(21)13-9-16(25(22,23)5-2)14(18)10-15(13)24-3/h9-10,12H,4-8,11,18H2,1-3H3,(H,19,21)	NTJOBXMMWNYJFB-UHFFFAOYSA-N	3	0.078955	0.805214	0.807882	9.77309	Danube	HMP/VMP
Amisulpride	71675-85-9	pos	2012	D1	365	[M+H]+	InChI=1S/C17H27N3O4S/c1-4-20-8-6-7-12(20)11-19-17(21)13-9-16(25(22,23)5-2)14(18)10-15(13)24-3/h9-10,12H,4-8,11,18H2,1-3H3,(H,19,21)	NTJOBXMMWNYJFB-UHFFFAOYSA-N	3	0.391371	1.05034	1.10495	35.4197	Danube	HMP/VMP
Amisulpride	71675-85-9	pos	2012	E5	365	[M+H]+	InChI=1S/C17H27N3O4S/c1-4-20-8-6-7-12(20)11-19-17(21)13-9-16(25(22,23)5-2)14(18)10-15(13)24-3/h9-10,12H,4-8,11,18H2,1-3H3,(H,19,21)	NTJOBXMMWNYJFB-UHFFFAOYSA-N	3	0.228413	3.67238	3.67708	6.2118	Elbe	HMP/VMP
Amisulpride	71675-85-9	pos	2012	E4	365	[M+H]+	InChI=1S/C17H27N3O4S/c1-4-20-8-6-7-12(20)11-19-17(21)13-9-16(25(22,23)5-2)14(18)10-15(13)24-3/h9-10,12H,4-8,11,18H2,1-3H3,(H,19,21)	NTJOBXMMWNYJFB-UHFFFAOYSA-N	3	0.365615	1.32148	1.35851	26.913	Elbe	HMP/VMP
Amisulpride	71675-85-9	pos	2012	E1	365	[M+H]+	InChI=1S/C17H27N3O4S/c1-4-20-8-6-7-12(20)11-19-17(21)13-9-16(25(22,23)5-2)14(18)10-15(13)24-3/h9-10,12H,4-8,11,18H2,1-3H3,(H,19,21)	NTJOBXMMWNYJFB-UHFFFAOYSA-N	3	0.219332	1.21756	1.22983	17.8344	Elbe	HMP/VMP
Amisulpride	71675-85-9	pos	2012	E2	365	[M+H]+	InChI=1S/C17H27N3O4S/c1-4-20-8-6-7-12(20)11-19-17(21)13-9-16(25(22,23)5-2)14(18)10-15(13)24-3/h9-10,12H,4-8,11,18H2,1-3H3,(H,19,21)	NTJOBXMMWNYJFB-UHFFFAOYSA-N	3	0.758838	3.76042	3.81232	19.9049	Elbe	HMP/VMP
Amisulpride	71675-85-9	pos	2012	Mu	365	[M+H]+	InChI=1S/C17H27N3O4S/c1-4-20-8-6-7-12(20)11-19-17(21)13-9-16(25(22,23)5-2)14(18)10-15(13)24-3/h9-10,12H,4-8,11,18H2,1-3H3,(H,19,21)	NTJOBXMMWNYJFB-UHFFFAOYSA-N	3	1.61037	2.24503	2.71247	59.3692	Mulde	HMP/VMP
Amisulpride	71675-85-9	pos	2012	R4	365	[M+H]+	InChI=1S/C17H27N3O4S/c1-4-20-8-6-7-12(20)11-19-17(21)13-9-16(25(22,23)5-2)14(18)10-15(13)24-3/h9-10,12H,4-8,11,18H2,1-3H3,(H,19,21)	NTJOBXMMWNYJFB-UHFFFAOYSA-N	3	0.210478	1.51025	1.51954	13.8514	Rhine	HMP/VMP
Amisulpride	71675-85-9	pos	2012	R3	365	[M+H]+	InChI=1S/C17H27N3O4S/c1-4-20-8-6-7-12(20)11-19-17(21)13-9-16(25(22,23)5-2)14(18)10-15(13)24-3/h9-10,12H,4-8,11,18H2,1-3H3,(H,19,21)	NTJOBXMMWNYJFB-UHFFFAOYSA-N	3	0.198497	1.05814	1.07139	18.527	Rhine	HMP/VMP
Amisulpride	71675-85-9	pos	2012	Sa	365	[M+H]+	InChI=1S/C17H27N3O4S/c1-4-20-8-6-7-12(20)11-19-17(21)13-9-16(25(22,23)5-2)14(18)10-15(13)24-3/h9-10,12H,4-8,11,18H2,1-3H3,(H,19,21)	NTJOBXMMWNYJFB-UHFFFAOYSA-N	3	1.93031	4.67166	4.97675	38.7865	Saale	HMP/VMP
Amisulpride	71675-85-9	pos	2012	S1	365	[M+H]+	InChI=1S/C17H27N3O4S/c1-4-20-8-6-7-12(20)11-19-17(21)13-9-16(25(22,23)5-2)14(18)10-15(13)24-3/h9-10,12H,4-8,11,18H2,1-3H3,(H,19,21)	NTJOBXMMWNYJFB-UHFFFAOYSA-N	3	1.52552	2.6264	2.97739	51.2368	Saar	HMP/VMP
Amisulpride	71675-85-9	pos	2012	S2	365	[M+H]+	InChI=1S/C17H27N3O4S/c1-4-20-8-6-7-12(20)11-19-17(21)13-9-16(25(22,23)5-2)14(18)10-15(13)24-3/h9-10,12H,4-8,11,18H2,1-3H3,(H,19,21)	NTJOBXMMWNYJFB-UHFFFAOYSA-N	3	0.306983	4.92185	4.92814	6.22919	Saar	HMP/VMP
Amisulpride	71675-85-9	pos	2013	D3	365	[M+H]+	InChI=1S/C17H27N3O4S/c1-4-20-8-6-7-12(20)11-19-17(21)13-9-16(25(22,23)5-2)14(18)10-15(13)24-3/h9-10,12H,4-8,11,18H2,1-3H3,(H,19,21)	NTJOBXMMWNYJFB-UHFFFAOYSA-N	3	0.103617	0.596169	0.602516	17.1973	Danube	HMP/VMP
Amisulpride	71675-85-9	pos	2013	D1	365	[M+H]+	InChI=1S/C17H27N3O4S/c1-4-20-8-6-7-12(20)11-19-17(21)13-9-16(25(22,23)5-2)14(18)10-15(13)24-3/h9-10,12H,4-8,11,18H2,1-3H3,(H,19,21)	NTJOBXMMWNYJFB-UHFFFAOYSA-N	3	0.242592	0.88052	0.904684	26.8151	Danube	HMP/VMP
Amisulpride	71675-85-9	pos	2013	E5	365	[M+H]+	InChI=1S/C17H27N3O4S/c1-4-20-8-6-7-12(20)11-19-17(21)13-9-16(25(22,23)5-2)14(18)10-15(13)24-3/h9-10,12H,4-8,11,18H2,1-3H3,(H,19,21)	NTJOBXMMWNYJFB-UHFFFAOYSA-N	3	0.0636777	2.01679	2.01747	3.15631	Elbe	HMP/VMP
Amisulpride	71675-85-9	pos	2013	E4	365	[M+H]+	InChI=1S/C17H27N3O4S/c1-4-20-8-6-7-12(20)11-19-17(21)13-9-16(25(22,23)5-2)14(18)10-15(13)24-3/h9-10,12H,4-8,11,18H2,1-3H3,(H,19,21)	NTJOBXMMWNYJFB-UHFFFAOYSA-N	3	0.196976	1.62945	1.63764	12.028	Elbe	HMP/VMP
Amisulpride	71675-85-9	pos	2013	E1	365	[M+H]+	InChI=1S/C17H27N3O4S/c1-4-20-8-6-7-12(20)11-19-17(21)13-9-16(25(22,23)5-2)14(18)10-15(13)24-3/h9-10,12H,4-8,11,18H2,1-3H3,(H,19,21)	NTJOBXMMWNYJFB-UHFFFAOYSA-N	3	0.251198	1.46158	1.47541	17.0256	Elbe	HMP/VMP
Amisulpride	71675-85-9	pos	2013	E2	365	[M+H]+	InChI=1S/C17H27N3O4S/c1-4-20-8-6-7-12(20)11-19-17(21)13-9-16(25(22,23)5-2)14(18)10-15(13)24-3/h9-10,12H,4-8,11,18H2,1-3H3,(H,19,21)	NTJOBXMMWNYJFB-UHFFFAOYSA-N	3	0.754728	2.13607	2.21388	34.0907	Elbe	HMP/VMP
Amisulpride	71675-85-9	pos	2013	Mu	365	[M+H]+	InChI=1S/C17H27N3O4S/c1-4-20-8-6-7-12(20)11-19-17(21)13-9-16(25(22,23)5-2)14(18)10-15(13)24-3/h9-10,12H,4-8,11,18H2,1-3H3,(H,19,21)	NTJOBXMMWNYJFB-UHFFFAOYSA-N	3	0.244519	1.28275	1.29752	18.8451	Mulde	HMP/VMP
Amisulpride	71675-85-9	pos	2013	R4	365	[M+H]+	InChI=1S/C17H27N3O4S/c1-4-20-8-6-7-12(20)11-19-17(21)13-9-16(25(22,23)5-2)14(18)10-15(13)24-3/h9-10,12H,4-8,11,18H2,1-3H3,(H,19,21)	NTJOBXMMWNYJFB-UHFFFAOYSA-N	3	0.0627683	1.57846	1.5793	3.97443	Rhine	HMP/VMP
Amisulpride	71675-85-9	pos	2013	R3	365	[M+H]+	InChI=1S/C17H27N3O4S/c1-4-20-8-6-7-12(20)11-19-17(21)13-9-16(25(22,23)5-2)14(18)10-15(13)24-3/h9-10,12H,4-8,11,18H2,1-3H3,(H,19,21)	NTJOBXMMWNYJFB-UHFFFAOYSA-N	3	0.0657259	1.1671	1.16836	5.6255	Rhine	HMP/VMP
Amisulpride	71675-85-9	pos	2013	Sa	365	[M+H]+	InChI=1S/C17H27N3O4S/c1-4-20-8-6-7-12(20)11-19-17(21)13-9-16(25(22,23)5-2)14(18)10-15(13)24-3/h9-10,12H,4-8,11,18H2,1-3H3,(H,19,21)	NTJOBXMMWNYJFB-UHFFFAOYSA-N	3	0.377379	3.78297	3.79552	9.94276	Saale	HMP/VMP
Amisulpride	71675-85-9	pos	2013	S1	365	[M+H]+	InChI=1S/C17H27N3O4S/c1-4-20-8-6-7-12(20)11-19-17(21)13-9-16(25(22,23)5-2)14(18)10-15(13)24-3/h9-10,12H,4-8,11,18H2,1-3H3,(H,19,21)	NTJOBXMMWNYJFB-UHFFFAOYSA-N	3	1.20992	2.8529	3.04591	39.723	Saar	HMP/VMP
Amisulpride	71675-85-9	pos	2013	S2	365	[M+H]+	InChI=1S/C17H27N3O4S/c1-4-20-8-6-7-12(20)11-19-17(21)13-9-16(25(22,23)5-2)14(18)10-15(13)24-3/h9-10,12H,4-8,11,18H2,1-3H3,(H,19,21)	NTJOBXMMWNYJFB-UHFFFAOYSA-N	3	0.212677	3.65482	3.65903	5.81238	Saar	HMP/VMP
Amisulpride	71675-85-9	pos	2014	D3	365	[M+H]+	InChI=1S/C17H27N3O4S/c1-4-20-8-6-7-12(20)11-19-17(21)13-9-16(25(22,23)5-2)14(18)10-15(13)24-3/h9-10,12H,4-8,11,18H2,1-3H3,(H,19,21)	NTJOBXMMWNYJFB-UHFFFAOYSA-N	3	0.10761	0.534799	0.542552	19.8341	Danube	HMP/VMP
Amisulpride	71675-85-9	pos	2014	D1	365	[M+H]+	InChI=1S/C17H27N3O4S/c1-4-20-8-6-7-12(20)11-19-17(21)13-9-16(25(22,23)5-2)14(18)10-15(13)24-3/h9-10,12H,4-8,11,18H2,1-3H3,(H,19,21)	NTJOBXMMWNYJFB-UHFFFAOYSA-N	3	0.32785	1.05719	1.09476	29.9472	Danube	HMP/VMP
Amisulpride	71675-85-9	pos	2014	E5	365	[M+H]+	InChI=1S/C17H27N3O4S/c1-4-20-8-6-7-12(20)11-19-17(21)13-9-16(25(22,23)5-2)14(18)10-15(13)24-3/h9-10,12H,4-8,11,18H2,1-3H3,(H,19,21)	NTJOBXMMWNYJFB-UHFFFAOYSA-N	3	0.178512	3.16039	3.16374	5.64243	Elbe	HMP/VMP
Amisulpride	71675-85-9	pos	2014	E4	365	[M+H]+	InChI=1S/C17H27N3O4S/c1-4-20-8-6-7-12(20)11-19-17(21)13-9-16(25(22,23)5-2)14(18)10-15(13)24-3/h9-10,12H,4-8,11,18H2,1-3H3,(H,19,21)	NTJOBXMMWNYJFB-UHFFFAOYSA-N	3	0.28452	1.34653	1.36815	20.796	Elbe	HMP/VMP
Amisulpride	71675-85-9	pos	2014	E1	365	[M+H]+	InChI=1S/C17H27N3O4S/c1-4-20-8-6-7-12(20)11-19-17(21)13-9-16(25(22,23)5-2)14(18)10-15(13)24-3/h9-10,12H,4-8,11,18H2,1-3H3,(H,19,21)	NTJOBXMMWNYJFB-UHFFFAOYSA-N	3	0.14416	1.4763	1.48114	9.73308	Elbe	HMP/VMP
Amisulpride	71675-85-9	pos	2014	E2	365	[M+H]+	InChI=1S/C17H27N3O4S/c1-4-20-8-6-7-12(20)11-19-17(21)13-9-16(25(22,23)5-2)14(18)10-15(13)24-3/h9-10,12H,4-8,11,18H2,1-3H3,(H,19,21)	NTJOBXMMWNYJFB-UHFFFAOYSA-N	3	0.692011	1.69336	1.7735	39.0194	Elbe	HMP/VMP
Amisulpride	71675-85-9	pos	2014	Mu	365	[M+H]+	InChI=1S/C17H27N3O4S/c1-4-20-8-6-7-12(20)11-19-17(21)13-9-16(25(22,23)5-2)14(18)10-15(13)24-3/h9-10,12H,4-8,11,18H2,1-3H3,(H,19,21)	NTJOBXMMWNYJFB-UHFFFAOYSA-N	3	0.286489	1.74159	1.758	16.2963	Mulde	HMP/VMP
Amisulpride	71675-85-9	pos	2014	R4	365	[M+H]+	InChI=1S/C17H27N3O4S/c1-4-20-8-6-7-12(20)11-19-17(21)13-9-16(25(22,23)5-2)14(18)10-15(13)24-3/h9-10,12H,4-8,11,18H2,1-3H3,(H,19,21)	NTJOBXMMWNYJFB-UHFFFAOYSA-N	3	0.030594	1.46318	1.4634	2.09061	Rhine	HMP/VMP
Amisulpride	71675-85-9	pos	2014	R3	365	[M+H]+	InChI=1S/C17H27N3O4S/c1-4-20-8-6-7-12(20)11-19-17(21)13-9-16(25(22,23)5-2)14(18)10-15(13)24-3/h9-10,12H,4-8,11,18H2,1-3H3,(H,19,21)	NTJOBXMMWNYJFB-UHFFFAOYSA-N	3	0.0126605	1.11349	1.11354	1.13697	Rhine	HMP/VMP
Amisulpride	71675-85-9	pos	2014	Sa	365	[M+H]+	InChI=1S/C17H27N3O4S/c1-4-20-8-6-7-12(20)11-19-17(21)13-9-16(25(22,23)5-2)14(18)10-15(13)24-3/h9-10,12H,4-8,11,18H2,1-3H3,(H,19,21)	NTJOBXMMWNYJFB-UHFFFAOYSA-N	3	0.865794	5.18865	5.23906	16.5257	Saale	HMP/VMP
Amisulpride	71675-85-9	pos	2014	S1	365	[M+H]+	InChI=1S/C17H27N3O4S/c1-4-20-8-6-7-12(20)11-19-17(21)13-9-16(25(22,23)5-2)14(18)10-15(13)24-3/h9-10,12H,4-8,11,18H2,1-3H3,(H,19,21)	NTJOBXMMWNYJFB-UHFFFAOYSA-N	3	0.119189	2.3615	2.36352	5.04285	Saar	HMP/VMP
Amisulpride	71675-85-9	pos	2014	S2	365	[M+H]+	InChI=1S/C17H27N3O4S/c1-4-20-8-6-7-12(20)11-19-17(21)13-9-16(25(22,23)5-2)14(18)10-15(13)24-3/h9-10,12H,4-8,11,18H2,1-3H3,(H,19,21)	NTJOBXMMWNYJFB-UHFFFAOYSA-N	3	0.786654	2.08222	2.19438	35.8485	Saar	HMP/VMP
Amisulpride	71675-85-9	pos	2015	D3	365	[M+H]+	InChI=1S/C17H27N3O4S/c1-4-20-8-6-7-12(20)11-19-17(21)13-9-16(25(22,23)5-2)14(18)10-15(13)24-3/h9-10,12H,4-8,11,18H2,1-3H3,(H,19,21)	NTJOBXMMWNYJFB-UHFFFAOYSA-N	3	0.162033	0.725172	0.737157	21.9808	Danube	HMP/VMP
Amisulpride	71675-85-9	pos	2015	D1	365	[M+H]+	InChI=1S/C17H27N3O4S/c1-4-20-8-6-7-12(20)11-19-17(21)13-9-16(25(22,23)5-2)14(18)10-15(13)24-3/h9-10,12H,4-8,11,18H2,1-3H3,(H,19,21)	NTJOBXMMWNYJFB-UHFFFAOYSA-N	3	0.343433	0.95549	1.00203	34.2739	Danube	HMP/VMP
Amisulpride	71675-85-9	pos	2015	E5	365	[M+H]+	InChI=1S/C17H27N3O4S/c1-4-20-8-6-7-12(20)11-19-17(21)13-9-16(25(22,23)5-2)14(18)10-15(13)24-3/h9-10,12H,4-8,11,18H2,1-3H3,(H,19,21)	NTJOBXMMWNYJFB-UHFFFAOYSA-N	3	0.120825	2.48345	2.48543	4.86132	Elbe	HMP/VMP
Amisulpride	71675-85-9	pos	2015	E4	365	[M+H]+	InChI=1S/C17H27N3O4S/c1-4-20-8-6-7-12(20)11-19-17(21)13-9-16(25(22,23)5-2)14(18)10-15(13)24-3/h9-10,12H,4-8,11,18H2,1-3H3,(H,19,21)	NTJOBXMMWNYJFB-UHFFFAOYSA-N	3	0.161106	1.30869	1.31558	12.246	Elbe	HMP/VMP
Amisulpride	71675-85-9	pos	2015	E1	365	[M+H]+	InChI=1S/C17H27N3O4S/c1-4-20-8-6-7-12(20)11-19-17(21)13-9-16(25(22,23)5-2)14(18)10-15(13)24-3/h9-10,12H,4-8,11,18H2,1-3H3,(H,19,21)	NTJOBXMMWNYJFB-UHFFFAOYSA-N	3	0.673521	1.70796	1.80582	37.2972	Elbe	HMP/VMP
Amisulpride	71675-85-9	pos	2015	E2	365	[M+H]+	InChI=1S/C17H27N3O4S/c1-4-20-8-6-7-12(20)11-19-17(21)13-9-16(25(22,23)5-2)14(18)10-15(13)24-3/h9-10,12H,4-8,11,18H2,1-3H3,(H,19,21)	NTJOBXMMWNYJFB-UHFFFAOYSA-N	3	1.02568	2.79885	2.90763	35.2754	Elbe	HMP/VMP
Amisulpride	71675-85-9	pos	2015	Mu	365	[M+H]+	InChI=1S/C17H27N3O4S/c1-4-20-8-6-7-12(20)11-19-17(21)13-9-16(25(22,23)5-2)14(18)10-15(13)24-3/h9-10,12H,4-8,11,18H2,1-3H3,(H,19,21)	NTJOBXMMWNYJFB-UHFFFAOYSA-N	3	0.621248	2.99351	3.03466	20.4718	Mulde	HMP/VMP
Amisulpride	71675-85-9	pos	2015	R4	365	[M+H]+	InChI=1S/C17H27N3O4S/c1-4-20-8-6-7-12(20)11-19-17(21)13-9-16(25(22,23)5-2)14(18)10-15(13)24-3/h9-10,12H,4-8,11,18H2,1-3H3,(H,19,21)	NTJOBXMMWNYJFB-UHFFFAOYSA-N	3	0.0880172	2.50388	2.5049	3.5138	Rhine	HMP/VMP
Amisulpride	71675-85-9	pos	2015	R3	365	[M+H]+	InChI=1S/C17H27N3O4S/c1-4-20-8-6-7-12(20)11-19-17(21)13-9-16(25(22,23)5-2)14(18)10-15(13)24-3/h9-10,12H,4-8,11,18H2,1-3H3,(H,19,21)	NTJOBXMMWNYJFB-UHFFFAOYSA-N	3	0.369545	1.12123	1.16537	31.7106	Rhine	HMP/VMP
Amisulpride	71675-85-9	pos	2015	Sa	365	[M+H]+	InChI=1S/C17H27N3O4S/c1-4-20-8-6-7-12(20)11-19-17(21)13-9-16(25(22,23)5-2)14(18)10-15(13)24-3/h9-10,12H,4-8,11,18H2,1-3H3,(H,19,21)	NTJOBXMMWNYJFB-UHFFFAOYSA-N	3	0.894079	5.15888	5.21261	17.1522	Saale	HMP/VMP
Amisulpride	71675-85-9	pos	2015	S1	365	[M+H]+	InChI=1S/C17H27N3O4S/c1-4-20-8-6-7-12(20)11-19-17(21)13-9-16(25(22,23)5-2)14(18)10-15(13)24-3/h9-10,12H,4-8,11,18H2,1-3H3,(H,19,21)	NTJOBXMMWNYJFB-UHFFFAOYSA-N	3	1.33692	3.65925	3.82676	34.936	Saar	HMP/VMP
Amisulpride	71675-85-9	pos	2015	S2	365	[M+H]+	InChI=1S/C17H27N3O4S/c1-4-20-8-6-7-12(20)11-19-17(21)13-9-16(25(22,23)5-2)14(18)10-15(13)24-3/h9-10,12H,4-8,11,18H2,1-3H3,(H,19,21)	NTJOBXMMWNYJFB-UHFFFAOYSA-N	3	0.934122	1.86957	2.04773	45.6175	Saar	HMP/VMP
Amisulpride	71675-85-9	pos	2016	D3	365	[M+H]+	InChI=1S/C17H27N3O4S/c1-4-20-8-6-7-12(20)11-19-17(21)13-9-16(25(22,23)5-2)14(18)10-15(13)24-3/h9-10,12H,4-8,11,18H2,1-3H3,(H,19,21)	NTJOBXMMWNYJFB-UHFFFAOYSA-N	3	0.106943	0.804254	0.809229	13.2154	Danube	HMP/VMP
Amisulpride	71675-85-9	pos	2016	D1	365	[M+H]+	InChI=1S/C17H27N3O4S/c1-4-20-8-6-7-12(20)11-19-17(21)13-9-16(25(22,23)5-2)14(18)10-15(13)24-3/h9-10,12H,4-8,11,18H2,1-3H3,(H,19,21)	NTJOBXMMWNYJFB-UHFFFAOYSA-N	3	0.362755	0.90579	0.960124	37.7821	Danube	HMP/VMP
Amisulpride	71675-85-9	pos	2016	E5	365	[M+H]+	InChI=1S/C17H27N3O4S/c1-4-20-8-6-7-12(20)11-19-17(21)13-9-16(25(22,23)5-2)14(18)10-15(13)24-3/h9-10,12H,4-8,11,18H2,1-3H3,(H,19,21)	NTJOBXMMWNYJFB-UHFFFAOYSA-N	3	2.04881	0.782102	2.19322	93.4153	Elbe	HMP/VMP
Amisulpride	71675-85-9	pos	2016	E4	365	[M+H]+	InChI=1S/C17H27N3O4S/c1-4-20-8-6-7-12(20)11-19-17(21)13-9-16(25(22,23)5-2)14(18)10-15(13)24-3/h9-10,12H,4-8,11,18H2,1-3H3,(H,19,21)	NTJOBXMMWNYJFB-UHFFFAOYSA-N	3	0.701642	2.28751	2.36147	29.7121	Elbe	HMP/VMP
Amisulpride	71675-85-9	pos	2016	E1	365	[M+H]+	InChI=1S/C17H27N3O4S/c1-4-20-8-6-7-12(20)11-19-17(21)13-9-16(25(22,23)5-2)14(18)10-15(13)24-3/h9-10,12H,4-8,11,18H2,1-3H3,(H,19,21)	NTJOBXMMWNYJFB-UHFFFAOYSA-N	3	0.420755	2.2615	2.28639	18.4026	Elbe	HMP/VMP
Amisulpride	71675-85-9	pos	2016	E2	365	[M+H]+	InChI=1S/C17H27N3O4S/c1-4-20-8-6-7-12(20)11-19-17(21)13-9-16(25(22,23)5-2)14(18)10-15(13)24-3/h9-10,12H,4-8,11,18H2,1-3H3,(H,19,21)	NTJOBXMMWNYJFB-UHFFFAOYSA-N	3	1.12496	2.66798	2.80195	40.1491	Elbe	HMP/VMP
Amisulpride	71675-85-9	pos	2016	Mu	365	[M+H]+	InChI=1S/C17H27N3O4S/c1-4-20-8-6-7-12(20)11-19-17(21)13-9-16(25(22,23)5-2)14(18)10-15(13)24-3/h9-10,12H,4-8,11,18H2,1-3H3,(H,19,21)	NTJOBXMMWNYJFB-UHFFFAOYSA-N	3	0.582539	2.81443	2.85161	20.4284	Mulde	HMP/VMP
Amisulpride	71675-85-9	pos	2016	R4	365	[M+H]+	InChI=1S/C17H27N3O4S/c1-4-20-8-6-7-12(20)11-19-17(21)13-9-16(25(22,23)5-2)14(18)10-15(13)24-3/h9-10,12H,4-8,11,18H2,1-3H3,(H,19,21)	NTJOBXMMWNYJFB-UHFFFAOYSA-N	3	0.0623504	2.71319	2.71368	2.29764	Rhine	HMP/VMP
Amisulpride	71675-85-9	pos	2016	Sa	365	[M+H]+	InChI=1S/C17H27N3O4S/c1-4-20-8-6-7-12(20)11-19-17(21)13-9-16(25(22,23)5-2)14(18)10-15(13)24-3/h9-10,12H,4-8,11,18H2,1-3H3,(H,19,21)	NTJOBXMMWNYJFB-UHFFFAOYSA-N	3	1.64283	6.02377	6.18784	26.5494	Saale	HMP/VMP
Amisulpride	71675-85-9	pos	2016	S1	365	[M+H]+	InChI=1S/C17H27N3O4S/c1-4-20-8-6-7-12(20)11-19-17(21)13-9-16(25(22,23)5-2)14(18)10-15(13)24-3/h9-10,12H,4-8,11,18H2,1-3H3,(H,19,21)	NTJOBXMMWNYJFB-UHFFFAOYSA-N	3	0.0883587	2.80801	2.80894	3.14562	Saar	HMP/VMP
Amisulpride	71675-85-9	pos	2016	S2	365	[M+H]+	InChI=1S/C17H27N3O4S/c1-4-20-8-6-7-12(20)11-19-17(21)13-9-16(25(22,23)5-2)14(18)10-15(13)24-3/h9-10,12H,4-8,11,18H2,1-3H3,(H,19,21)	NTJOBXMMWNYJFB-UHFFFAOYSA-N	3	0.303358	4.39078	4.39785	6.89786	Saar	HMP/VMP
Amisulpride	71675-85-9	pos	2017	D3	365	[M+H]+	InChI=1S/C17H27N3O4S/c1-4-20-8-6-7-12(20)11-19-17(21)13-9-16(25(22,23)5-2)14(18)10-15(13)24-3/h9-10,12H,4-8,11,18H2,1-3H3,(H,19,21)	NTJOBXMMWNYJFB-UHFFFAOYSA-N	3	0.0124678	0.768839	0.768907	1.6215	Danube	HMP/VMP
Amisulpride	71675-85-9	pos	2017	D1	365	[M+H]+	InChI=1S/C17H27N3O4S/c1-4-20-8-6-7-12(20)11-19-17(21)13-9-16(25(22,23)5-2)14(18)10-15(13)24-3/h9-10,12H,4-8,11,18H2,1-3H3,(H,19,21)	NTJOBXMMWNYJFB-UHFFFAOYSA-N	3	0.271679	0.833013	0.865385	31.3941	Danube	HMP/VMP
Amisulpride	71675-85-9	pos	2017	E5	365	[M+H]+	InChI=1S/C17H27N3O4S/c1-4-20-8-6-7-12(20)11-19-17(21)13-9-16(25(22,23)5-2)14(18)10-15(13)24-3/h9-10,12H,4-8,11,18H2,1-3H3,(H,19,21)	NTJOBXMMWNYJFB-UHFFFAOYSA-N	3	1.55821	1.75923	2.1969	70.9278	Elbe	HMP/VMP
Amisulpride	71675-85-9	pos	2017	E4	365	[M+H]+	InChI=1S/C17H27N3O4S/c1-4-20-8-6-7-12(20)11-19-17(21)13-9-16(25(22,23)5-2)14(18)10-15(13)24-3/h9-10,12H,4-8,11,18H2,1-3H3,(H,19,21)	NTJOBXMMWNYJFB-UHFFFAOYSA-N	3	0.375723	2.28281	2.30442	16.3044	Elbe	HMP/VMP
Amisulpride	71675-85-9	pos	2017	E1	365	[M+H]+	InChI=1S/C17H27N3O4S/c1-4-20-8-6-7-12(20)11-19-17(21)13-9-16(25(22,23)5-2)14(18)10-15(13)24-3/h9-10,12H,4-8,11,18H2,1-3H3,(H,19,21)	NTJOBXMMWNYJFB-UHFFFAOYSA-N	3	0.186393	1.7939	1.80017	10.3542	Elbe	HMP/VMP
Amisulpride	71675-85-9	pos	2017	E2	365	[M+H]+	InChI=1S/C17H27N3O4S/c1-4-20-8-6-7-12(20)11-19-17(21)13-9-16(25(22,23)5-2)14(18)10-15(13)24-3/h9-10,12H,4-8,11,18H2,1-3H3,(H,19,21)	NTJOBXMMWNYJFB-UHFFFAOYSA-N	3	0.25648	2.165	2.1755	11.7895	Elbe	HMP/VMP
Amisulpride	71675-85-9	pos	2017	Mu	365	[M+H]+	InChI=1S/C17H27N3O4S/c1-4-20-8-6-7-12(20)11-19-17(21)13-9-16(25(22,23)5-2)14(18)10-15(13)24-3/h9-10,12H,4-8,11,18H2,1-3H3,(H,19,21)	NTJOBXMMWNYJFB-UHFFFAOYSA-N	3	0.450012	2.76759	2.79057	16.1261	Mulde	HMP/VMP
Amisulpride	71675-85-9	pos	2017	R4	365	[M+H]+	InChI=1S/C17H27N3O4S/c1-4-20-8-6-7-12(20)11-19-17(21)13-9-16(25(22,23)5-2)14(18)10-15(13)24-3/h9-10,12H,4-8,11,18H2,1-3H3,(H,19,21)	NTJOBXMMWNYJFB-UHFFFAOYSA-N	3	0.112579	2.64045	2.64203	4.26109	Rhine	HMP/VMP
Amisulpride	71675-85-9	pos	2017	R3	365	[M+H]+	InChI=1S/C17H27N3O4S/c1-4-20-8-6-7-12(20)11-19-17(21)13-9-16(25(22,23)5-2)14(18)10-15(13)24-3/h9-10,12H,4-8,11,18H2,1-3H3,(H,19,21)	NTJOBXMMWNYJFB-UHFFFAOYSA-N	3	0.0320343	1.13437	1.13467	2.82323	Rhine	HMP/VMP
Amisulpride	71675-85-9	pos	2017	Sa	365	[M+H]+	InChI=1S/C17H27N3O4S/c1-4-20-8-6-7-12(20)11-19-17(21)13-9-16(25(22,23)5-2)14(18)10-15(13)24-3/h9-10,12H,4-8,11,18H2,1-3H3,(H,19,21)	NTJOBXMMWNYJFB-UHFFFAOYSA-N	3	0.908217	4.80008	4.85939	18.6899	Saale	HMP/VMP
Amisulpride	71675-85-9	pos	2017	S1	365	[M+H]+	InChI=1S/C17H27N3O4S/c1-4-20-8-6-7-12(20)11-19-17(21)13-9-16(25(22,23)5-2)14(18)10-15(13)24-3/h9-10,12H,4-8,11,18H2,1-3H3,(H,19,21)	NTJOBXMMWNYJFB-UHFFFAOYSA-N	3	0.0896475	3.95327	3.95395	2.26729	Saar	HMP/VMP
Amisulpride	71675-85-9	pos	2017	S2	365	[M+H]+	InChI=1S/C17H27N3O4S/c1-4-20-8-6-7-12(20)11-19-17(21)13-9-16(25(22,23)5-2)14(18)10-15(13)24-3/h9-10,12H,4-8,11,18H2,1-3H3,(H,19,21)	NTJOBXMMWNYJFB-UHFFFAOYSA-N	3	0.314289	6.85806	6.86291	4.57953	Saar	HMP/VMP
Amisulpride	71675-85-9	pos	2018	D3	365	[M+H]+	InChI=1S/C17H27N3O4S/c1-4-20-8-6-7-12(20)11-19-17(21)13-9-16(25(22,23)5-2)14(18)10-15(13)24-3/h9-10,12H,4-8,11,18H2,1-3H3,(H,19,21)	NTJOBXMMWNYJFB-UHFFFAOYSA-N	3	0.0949982	0.573404	0.578475	16.4222	Danube	HMP/VMP
Amisulpride	71675-85-9	pos	2018	D1	365	[M+H]+	InChI=1S/C17H27N3O4S/c1-4-20-8-6-7-12(20)11-19-17(21)13-9-16(25(22,23)5-2)14(18)10-15(13)24-3/h9-10,12H,4-8,11,18H2,1-3H3,(H,19,21)	NTJOBXMMWNYJFB-UHFFFAOYSA-N	3	0.212743	1.59725	1.60663	13.2416	Danube	HMP/VMP
Amisulpride	71675-85-9	pos	2018	E5	365	[M+H]+	InChI=1S/C17H27N3O4S/c1-4-20-8-6-7-12(20)11-19-17(21)13-9-16(25(22,23)5-2)14(18)10-15(13)24-3/h9-10,12H,4-8,11,18H2,1-3H3,(H,19,21)	NTJOBXMMWNYJFB-UHFFFAOYSA-N	3	0.19573	3.20184	3.20574	6.10561	Elbe	HMP/VMP
Amisulpride	71675-85-9	pos	2018	E4	365	[M+H]+	InChI=1S/C17H27N3O4S/c1-4-20-8-6-7-12(20)11-19-17(21)13-9-16(25(22,23)5-2)14(18)10-15(13)24-3/h9-10,12H,4-8,11,18H2,1-3H3,(H,19,21)	NTJOBXMMWNYJFB-UHFFFAOYSA-N	2	0.398752	1.31311	1.34304	29.6903	Elbe	HMP/VMP
Amisulpride	71675-85-9	pos	2018	E1	365	[M+H]+	InChI=1S/C17H27N3O4S/c1-4-20-8-6-7-12(20)11-19-17(21)13-9-16(25(22,23)5-2)14(18)10-15(13)24-3/h9-10,12H,4-8,11,18H2,1-3H3,(H,19,21)	NTJOBXMMWNYJFB-UHFFFAOYSA-N	3	0.0618871	2.16838	2.16897	2.8533	Elbe	HMP/VMP
Amisulpride	71675-85-9	pos	2018	E2	365	[M+H]+	InChI=1S/C17H27N3O4S/c1-4-20-8-6-7-12(20)11-19-17(21)13-9-16(25(22,23)5-2)14(18)10-15(13)24-3/h9-10,12H,4-8,11,18H2,1-3H3,(H,19,21)	NTJOBXMMWNYJFB-UHFFFAOYSA-N	3	0.193519	2.39835	2.40353	8.05144	Elbe	HMP/VMP
Amisulpride	71675-85-9	pos	2018	Mu	365	[M+H]+	InChI=1S/C17H27N3O4S/c1-4-20-8-6-7-12(20)11-19-17(21)13-9-16(25(22,23)5-2)14(18)10-15(13)24-3/h9-10,12H,4-8,11,18H2,1-3H3,(H,19,21)	NTJOBXMMWNYJFB-UHFFFAOYSA-N	3	0.155331	2.10488	2.1088	7.36587	Mulde	HMP/VMP
Amisulpride	71675-85-9	pos	2018	R4	365	[M+H]+	InChI=1S/C17H27N3O4S/c1-4-20-8-6-7-12(20)11-19-17(21)13-9-16(25(22,23)5-2)14(18)10-15(13)24-3/h9-10,12H,4-8,11,18H2,1-3H3,(H,19,21)	NTJOBXMMWNYJFB-UHFFFAOYSA-N	3	0.0305862	2.97403	2.97414	1.0284	Rhine	HMP/VMP
Amisulpride	71675-85-9	pos	2018	R3	365	[M+H]+	InChI=1S/C17H27N3O4S/c1-4-20-8-6-7-12(20)11-19-17(21)13-9-16(25(22,23)5-2)14(18)10-15(13)24-3/h9-10,12H,4-8,11,18H2,1-3H3,(H,19,21)	NTJOBXMMWNYJFB-UHFFFAOYSA-N	3	0.178826	0.616797	0.632205	28.286	Rhine	HMP/VMP
Amisulpride	71675-85-9	pos	2018	Sa	365	[M+H]+	InChI=1S/C17H27N3O4S/c1-4-20-8-6-7-12(20)11-19-17(21)13-9-16(25(22,23)5-2)14(18)10-15(13)24-3/h9-10,12H,4-8,11,18H2,1-3H3,(H,19,21)	NTJOBXMMWNYJFB-UHFFFAOYSA-N	3	0.257952	4.47896	4.48388	5.75287	Saale	HMP/VMP
Amisulpride	71675-85-9	pos	2018	S1	365	[M+H]+	InChI=1S/C17H27N3O4S/c1-4-20-8-6-7-12(20)11-19-17(21)13-9-16(25(22,23)5-2)14(18)10-15(13)24-3/h9-10,12H,4-8,11,18H2,1-3H3,(H,19,21)	NTJOBXMMWNYJFB-UHFFFAOYSA-N	3	0.0942944	2.59266	2.59381	3.63537	Saar	HMP/VMP
Amisulpride	71675-85-9	pos	2018	S2	365	[M+H]+	InChI=1S/C17H27N3O4S/c1-4-20-8-6-7-12(20)11-19-17(21)13-9-16(25(22,23)5-2)14(18)10-15(13)24-3/h9-10,12H,4-8,11,18H2,1-3H3,(H,19,21)	NTJOBXMMWNYJFB-UHFFFAOYSA-N	3	0.372385	3.40256	3.41612	10.9008	Saar	HMP/VMP
Amisulpride	71675-85-9	pos	2019	D3	365	[M+H]+	InChI=1S/C17H27N3O4S/c1-4-20-8-6-7-12(20)11-19-17(21)13-9-16(25(22,23)5-2)14(18)10-15(13)24-3/h9-10,12H,4-8,11,18H2,1-3H3,(H,19,21)	NTJOBXMMWNYJFB-UHFFFAOYSA-N	3	0.00338331	0.650016	0.650022	0.520492	Danube	HMP/VMP
Amisulpride	71675-85-9	pos	2019	D1	365	[M+H]+	InChI=1S/C17H27N3O4S/c1-4-20-8-6-7-12(20)11-19-17(21)13-9-16(25(22,23)5-2)14(18)10-15(13)24-3/h9-10,12H,4-8,11,18H2,1-3H3,(H,19,21)	NTJOBXMMWNYJFB-UHFFFAOYSA-N	3	0.0818378	1.15431	1.15622	7.07806	Danube	HMP/VMP
Amisulpride	71675-85-9	pos	2019	E5	365	[M+H]+	InChI=1S/C17H27N3O4S/c1-4-20-8-6-7-12(20)11-19-17(21)13-9-16(25(22,23)5-2)14(18)10-15(13)24-3/h9-10,12H,4-8,11,18H2,1-3H3,(H,19,21)	NTJOBXMMWNYJFB-UHFFFAOYSA-N	3	0.0226038	3.86372	3.86377	0.585018	Elbe	HMP/VMP
Amisulpride	71675-85-9	pos	2019	E4	365	[M+H]+	InChI=1S/C17H27N3O4S/c1-4-20-8-6-7-12(20)11-19-17(21)13-9-16(25(22,23)5-2)14(18)10-15(13)24-3/h9-10,12H,4-8,11,18H2,1-3H3,(H,19,21)	NTJOBXMMWNYJFB-UHFFFAOYSA-N	3	0.244693	1.25508	1.26986	19.2693	Elbe	HMP/VMP
Amisulpride	71675-85-9	pos	2019	E1	365	[M+H]+	InChI=1S/C17H27N3O4S/c1-4-20-8-6-7-12(20)11-19-17(21)13-9-16(25(22,23)5-2)14(18)10-15(13)24-3/h9-10,12H,4-8,11,18H2,1-3H3,(H,19,21)	NTJOBXMMWNYJFB-UHFFFAOYSA-N	2	0.0764605	2.80354	2.80407	2.72677	Elbe	HMP/VMP
Amisulpride	71675-85-9	pos	2019	E2	365	[M+H]+	InChI=1S/C17H27N3O4S/c1-4-20-8-6-7-12(20)11-19-17(21)13-9-16(25(22,23)5-2)14(18)10-15(13)24-3/h9-10,12H,4-8,11,18H2,1-3H3,(H,19,21)	NTJOBXMMWNYJFB-UHFFFAOYSA-N	3	0.2646	2.35786	2.36811	11.1734	Elbe	HMP/VMP
Amisulpride	71675-85-9	pos	2019	Mu	365	[M+H]+	InChI=1S/C17H27N3O4S/c1-4-20-8-6-7-12(20)11-19-17(21)13-9-16(25(22,23)5-2)14(18)10-15(13)24-3/h9-10,12H,4-8,11,18H2,1-3H3,(H,19,21)	NTJOBXMMWNYJFB-UHFFFAOYSA-N	3	1.22078	3.55685	3.68021	33.1715	Mulde	HMP/VMP
Amisulpride	71675-85-9	pos	2019	R4	365	[M+H]+	InChI=1S/C17H27N3O4S/c1-4-20-8-6-7-12(20)11-19-17(21)13-9-16(25(22,23)5-2)14(18)10-15(13)24-3/h9-10,12H,4-8,11,18H2,1-3H3,(H,19,21)	NTJOBXMMWNYJFB-UHFFFAOYSA-N	3	0.733401	2.3353	2.42076	30.2964	Rhine	HMP/VMP
Amisulpride	71675-85-9	pos	2019	R3	365	[M+H]+	InChI=1S/C17H27N3O4S/c1-4-20-8-6-7-12(20)11-19-17(21)13-9-16(25(22,23)5-2)14(18)10-15(13)24-3/h9-10,12H,4-8,11,18H2,1-3H3,(H,19,21)	NTJOBXMMWNYJFB-UHFFFAOYSA-N	3	0.107685	1.41152	1.41426	7.61426	Rhine	HMP/VMP
Amisulpride	71675-85-9	pos	2019	R1	365	[M+H]+	InChI=1S/C17H27N3O4S/c1-4-20-8-6-7-12(20)11-19-17(21)13-9-16(25(22,23)5-2)14(18)10-15(13)24-3/h9-10,12H,4-8,11,18H2,1-3H3,(H,19,21)	NTJOBXMMWNYJFB-UHFFFAOYSA-N	3	0.0841048	0.410558	0.415863	20.2242	Rhine	HMP/VMP
Amisulpride	71675-85-9	pos	2019	Sa	365	[M+H]+	InChI=1S/C17H27N3O4S/c1-4-20-8-6-7-12(20)11-19-17(21)13-9-16(25(22,23)5-2)14(18)10-15(13)24-3/h9-10,12H,4-8,11,18H2,1-3H3,(H,19,21)	NTJOBXMMWNYJFB-UHFFFAOYSA-N	3	2.33993	3.73798	4.31595	54.2159	Saale	HMP/VMP
Amisulpride	71675-85-9	pos	2019	S1	365	[M+H]+	InChI=1S/C17H27N3O4S/c1-4-20-8-6-7-12(20)11-19-17(21)13-9-16(25(22,23)5-2)14(18)10-15(13)24-3/h9-10,12H,4-8,11,18H2,1-3H3,(H,19,21)	NTJOBXMMWNYJFB-UHFFFAOYSA-N	3	0.318964	2.46843	2.4815	12.8537	Saar	HMP/VMP
Amisulpride	71675-85-9	pos	2019	S2	365	[M+H]+	InChI=1S/C17H27N3O4S/c1-4-20-8-6-7-12(20)11-19-17(21)13-9-16(25(22,23)5-2)14(18)10-15(13)24-3/h9-10,12H,4-8,11,18H2,1-3H3,(H,19,21)	NTJOBXMMWNYJFB-UHFFFAOYSA-N	3	0.195127	3.3323	3.33602	5.8491	Saar	HMP/VMP
Amisulpride	71675-85-9	pos	2020	D3	365	[M+H]+	InChI=1S/C17H27N3O4S/c1-4-20-8-6-7-12(20)11-19-17(21)13-9-16(25(22,23)5-2)14(18)10-15(13)24-3/h9-10,12H,4-8,11,18H2,1-3H3,(H,19,21)	NTJOBXMMWNYJFB-UHFFFAOYSA-N	3	0.177645	0.401783	0.432005	41.121	Danube	HMP/VMP
Amisulpride	71675-85-9	pos	2020	D1	365	[M+H]+	InChI=1S/C17H27N3O4S/c1-4-20-8-6-7-12(20)11-19-17(21)13-9-16(25(22,23)5-2)14(18)10-15(13)24-3/h9-10,12H,4-8,11,18H2,1-3H3,(H,19,21)	NTJOBXMMWNYJFB-UHFFFAOYSA-N	2	0.0272778	0.724914	0.725171	3.76156	Danube	HMP/VMP
Amisulpride	71675-85-9	pos	2020	E5	365	[M+H]+	InChI=1S/C17H27N3O4S/c1-4-20-8-6-7-12(20)11-19-17(21)13-9-16(25(22,23)5-2)14(18)10-15(13)24-3/h9-10,12H,4-8,11,18H2,1-3H3,(H,19,21)	NTJOBXMMWNYJFB-UHFFFAOYSA-N	2	0.168084	1.66991	1.67413	10.0401	Elbe	HMP/VMP
Amisulpride	71675-85-9	pos	2020	E4	365	[M+H]+	InChI=1S/C17H27N3O4S/c1-4-20-8-6-7-12(20)11-19-17(21)13-9-16(25(22,23)5-2)14(18)10-15(13)24-3/h9-10,12H,4-8,11,18H2,1-3H3,(H,19,21)	NTJOBXMMWNYJFB-UHFFFAOYSA-N	3	0.368289	1.88161	1.90655	19.317	Elbe	HMP/VMP
Amisulpride	71675-85-9	pos	2020	E1	365	[M+H]+	InChI=1S/C17H27N3O4S/c1-4-20-8-6-7-12(20)11-19-17(21)13-9-16(25(22,23)5-2)14(18)10-15(13)24-3/h9-10,12H,4-8,11,18H2,1-3H3,(H,19,21)	NTJOBXMMWNYJFB-UHFFFAOYSA-N	3	0.392636	1.20239	1.24975	31.4171	Elbe	HMP/VMP
Amisulpride	71675-85-9	pos	2020	E2	365	[M+H]+	InChI=1S/C17H27N3O4S/c1-4-20-8-6-7-12(20)11-19-17(21)13-9-16(25(22,23)5-2)14(18)10-15(13)24-3/h9-10,12H,4-8,11,18H2,1-3H3,(H,19,21)	NTJOBXMMWNYJFB-UHFFFAOYSA-N	3	1.74765	4.17063	4.43137	39.4382	Elbe	HMP/VMP
Amisulpride	71675-85-9	pos	2020	Mu	365	[M+H]+	InChI=1S/C17H27N3O4S/c1-4-20-8-6-7-12(20)11-19-17(21)13-9-16(25(22,23)5-2)14(18)10-15(13)24-3/h9-10,12H,4-8,11,18H2,1-3H3,(H,19,21)	NTJOBXMMWNYJFB-UHFFFAOYSA-N	3	0.297606	1.98399	1.99899	14.8878	Mulde	HMP/VMP
Amisulpride	71675-85-9	pos	2020	R4	365	[M+H]+	InChI=1S/C17H27N3O4S/c1-4-20-8-6-7-12(20)11-19-17(21)13-9-16(25(22,23)5-2)14(18)10-15(13)24-3/h9-10,12H,4-8,11,18H2,1-3H3,(H,19,21)	NTJOBXMMWNYJFB-UHFFFAOYSA-N	3	0.915604	2.4194	2.54389	35.9922	Rhine	HMP/VMP
Amisulpride	71675-85-9	pos	2020	R3	365	[M+H]+	InChI=1S/C17H27N3O4S/c1-4-20-8-6-7-12(20)11-19-17(21)13-9-16(25(22,23)5-2)14(18)10-15(13)24-3/h9-10,12H,4-8,11,18H2,1-3H3,(H,19,21)	NTJOBXMMWNYJFB-UHFFFAOYSA-N	3	0.556595	1.53605	1.61196	34.529	Rhine	HMP/VMP
Amisulpride	71675-85-9	pos	2020	R1	365	[M+H]+	InChI=1S/C17H27N3O4S/c1-4-20-8-6-7-12(20)11-19-17(21)13-9-16(25(22,23)5-2)14(18)10-15(13)24-3/h9-10,12H,4-8,11,18H2,1-3H3,(H,19,21)	NTJOBXMMWNYJFB-UHFFFAOYSA-N	3	0.112099	0.569463	0.577284	19.4183	Rhine	HMP/VMP
Amisulpride	71675-85-9	pos	2020	Sa	365	[M+H]+	InChI=1S/C17H27N3O4S/c1-4-20-8-6-7-12(20)11-19-17(21)13-9-16(25(22,23)5-2)14(18)10-15(13)24-3/h9-10,12H,4-8,11,18H2,1-3H3,(H,19,21)	NTJOBXMMWNYJFB-UHFFFAOYSA-N	3	0.996673	5.61004	5.66689	17.5877	Saale	HMP/VMP
Amisulpride	71675-85-9	pos	2020	S1	365	[M+H]+	InChI=1S/C17H27N3O4S/c1-4-20-8-6-7-12(20)11-19-17(21)13-9-16(25(22,23)5-2)14(18)10-15(13)24-3/h9-10,12H,4-8,11,18H2,1-3H3,(H,19,21)	NTJOBXMMWNYJFB-UHFFFAOYSA-N	3	0.197404	1.8891	1.89571	10.4132	Saar	HMP/VMP
Amisulpride	71675-85-9	pos	2020	S2	365	[M+H]+	InChI=1S/C17H27N3O4S/c1-4-20-8-6-7-12(20)11-19-17(21)13-9-16(25(22,23)5-2)14(18)10-15(13)24-3/h9-10,12H,4-8,11,18H2,1-3H3,(H,19,21)	NTJOBXMMWNYJFB-UHFFFAOYSA-N	3	0.0950043	2.6271	2.62823	3.61476	Saar	HMP/VMP
Amisulpride	71675-85-9	pos	2021	D3	365	[M+H]+	InChI=1S/C17H27N3O4S/c1-4-20-8-6-7-12(20)11-19-17(21)13-9-16(25(22,23)5-2)14(18)10-15(13)24-3/h9-10,12H,4-8,11,18H2,1-3H3,(H,19,21)	NTJOBXMMWNYJFB-UHFFFAOYSA-N	3	0.0216977	0.493991	0.494311	4.38949	Danube	HMP/VMP
Amisulpride	71675-85-9	pos	2021	D1	365	[M+H]+	InChI=1S/C17H27N3O4S/c1-4-20-8-6-7-12(20)11-19-17(21)13-9-16(25(22,23)5-2)14(18)10-15(13)24-3/h9-10,12H,4-8,11,18H2,1-3H3,(H,19,21)	NTJOBXMMWNYJFB-UHFFFAOYSA-N	3	0.192937	0.699579	0.715694	26.958	Danube	HMP/VMP
Amisulpride	71675-85-9	pos	2021	E5	365	[M+H]+	InChI=1S/C17H27N3O4S/c1-4-20-8-6-7-12(20)11-19-17(21)13-9-16(25(22,23)5-2)14(18)10-15(13)24-3/h9-10,12H,4-8,11,18H2,1-3H3,(H,19,21)	NTJOBXMMWNYJFB-UHFFFAOYSA-N	3	0.729079	3.42103	3.47363	20.989	Elbe	HMP/VMP
Amisulpride	71675-85-9	pos	2021	E4	365	[M+H]+	InChI=1S/C17H27N3O4S/c1-4-20-8-6-7-12(20)11-19-17(21)13-9-16(25(22,23)5-2)14(18)10-15(13)24-3/h9-10,12H,4-8,11,18H2,1-3H3,(H,19,21)	NTJOBXMMWNYJFB-UHFFFAOYSA-N	3	0.22995	2.00265	2.01183	11.4299	Elbe	HMP/VMP
Amisulpride	71675-85-9	pos	2021	E1	365	[M+H]+	InChI=1S/C17H27N3O4S/c1-4-20-8-6-7-12(20)11-19-17(21)13-9-16(25(22,23)5-2)14(18)10-15(13)24-3/h9-10,12H,4-8,11,18H2,1-3H3,(H,19,21)	NTJOBXMMWNYJFB-UHFFFAOYSA-N	3	0.558576	4.2666	4.29198	13.0144	Elbe	HMP/VMP
Amisulpride	71675-85-9	pos	2021	E2	365	[M+H]+	InChI=1S/C17H27N3O4S/c1-4-20-8-6-7-12(20)11-19-17(21)13-9-16(25(22,23)5-2)14(18)10-15(13)24-3/h9-10,12H,4-8,11,18H2,1-3H3,(H,19,21)	NTJOBXMMWNYJFB-UHFFFAOYSA-N	3	0.381941	3.00102	3.01644	12.662	Elbe	HMP/VMP
Amisulpride	71675-85-9	pos	2021	Mu	365	[M+H]+	InChI=1S/C17H27N3O4S/c1-4-20-8-6-7-12(20)11-19-17(21)13-9-16(25(22,23)5-2)14(18)10-15(13)24-3/h9-10,12H,4-8,11,18H2,1-3H3,(H,19,21)	NTJOBXMMWNYJFB-UHFFFAOYSA-N	3	0.426641	3.81338	3.82862	11.1435	Mulde	HMP/VMP
Amisulpride	71675-85-9	pos	2021	R4	365	[M+H]+	InChI=1S/C17H27N3O4S/c1-4-20-8-6-7-12(20)11-19-17(21)13-9-16(25(22,23)5-2)14(18)10-15(13)24-3/h9-10,12H,4-8,11,18H2,1-3H3,(H,19,21)	NTJOBXMMWNYJFB-UHFFFAOYSA-N	3	0.13426	3.33452	3.33634	4.02417	Rhine	HMP/VMP
Amisulpride	71675-85-9	pos	2021	R3	365	[M+H]+	InChI=1S/C17H27N3O4S/c1-4-20-8-6-7-12(20)11-19-17(21)13-9-16(25(22,23)5-2)14(18)10-15(13)24-3/h9-10,12H,4-8,11,18H2,1-3H3,(H,19,21)	NTJOBXMMWNYJFB-UHFFFAOYSA-N	3	1.027	1.89878	2.10486	48.7918	Rhine	HMP/VMP
Amisulpride	71675-85-9	pos	2021	R1	365	[M+H]+	InChI=1S/C17H27N3O4S/c1-4-20-8-6-7-12(20)11-19-17(21)13-9-16(25(22,23)5-2)14(18)10-15(13)24-3/h9-10,12H,4-8,11,18H2,1-3H3,(H,19,21)	NTJOBXMMWNYJFB-UHFFFAOYSA-N	3	0.0948365	0.225134	0.237514	39.9287	Rhine	HMP/VMP
Amisulpride	71675-85-9	pos	2021	Sa	365	[M+H]+	InChI=1S/C17H27N3O4S/c1-4-20-8-6-7-12(20)11-19-17(21)13-9-16(25(22,23)5-2)14(18)10-15(13)24-3/h9-10,12H,4-8,11,18H2,1-3H3,(H,19,21)	NTJOBXMMWNYJFB-UHFFFAOYSA-N	3	1.2617	8.8488	8.91199	14.1574	Saale	HMP/VMP
Amisulpride	71675-85-9	pos	2021	S1	365	[M+H]+	InChI=1S/C17H27N3O4S/c1-4-20-8-6-7-12(20)11-19-17(21)13-9-16(25(22,23)5-2)14(18)10-15(13)24-3/h9-10,12H,4-8,11,18H2,1-3H3,(H,19,21)	NTJOBXMMWNYJFB-UHFFFAOYSA-N	3	0.285611	2.48779	2.49826	11.4324	Saar	HMP/VMP
Amisulpride	71675-85-9	pos	2021	S2	365	[M+H]+	InChI=1S/C17H27N3O4S/c1-4-20-8-6-7-12(20)11-19-17(21)13-9-16(25(22,23)5-2)14(18)10-15(13)24-3/h9-10,12H,4-8,11,18H2,1-3H3,(H,19,21)	NTJOBXMMWNYJFB-UHFFFAOYSA-N	3	0.680068	4.07444	4.11079	16.5435	Saar	HMP/VMP
Amisulpride	71675-85-9	pos	2022	D3	365	[M+H]+	InChI=1S/C17H27N3O4S/c1-4-20-8-6-7-12(20)11-19-17(21)13-9-16(25(22,23)5-2)14(18)10-15(13)24-3/h9-10,12H,4-8,11,18H2,1-3H3,(H,19,21)	NTJOBXMMWNYJFB-UHFFFAOYSA-N	3	0.0209161	0.319259	0.319704	6.54234	Danube	HMP/VMP
Amisulpride	71675-85-9	pos	2022	D1	365	[M+H]+	InChI=1S/C17H27N3O4S/c1-4-20-8-6-7-12(20)11-19-17(21)13-9-16(25(22,23)5-2)14(18)10-15(13)24-3/h9-10,12H,4-8,11,18H2,1-3H3,(H,19,21)	NTJOBXMMWNYJFB-UHFFFAOYSA-N	3	0.0807658	0.758732	0.761711	10.6032	Danube	HMP/VMP
Amisulpride	71675-85-9	pos	2022	E5	365	[M+H]+	InChI=1S/C17H27N3O4S/c1-4-20-8-6-7-12(20)11-19-17(21)13-9-16(25(22,23)5-2)14(18)10-15(13)24-3/h9-10,12H,4-8,11,18H2,1-3H3,(H,19,21)	NTJOBXMMWNYJFB-UHFFFAOYSA-N	3	0.0974805	1.36411	1.36637	7.13425	Elbe	HMP/VMP
Amisulpride	71675-85-9	pos	2022	E4	365	[M+H]+	InChI=1S/C17H27N3O4S/c1-4-20-8-6-7-12(20)11-19-17(21)13-9-16(25(22,23)5-2)14(18)10-15(13)24-3/h9-10,12H,4-8,11,18H2,1-3H3,(H,19,21)	NTJOBXMMWNYJFB-UHFFFAOYSA-N	2	0.00548305	0.789024	0.789033	0.694907	Elbe	HMP/VMP
Amisulpride	71675-85-9	pos	2022	E1	365	[M+H]+	InChI=1S/C17H27N3O4S/c1-4-20-8-6-7-12(20)11-19-17(21)13-9-16(25(22,23)5-2)14(18)10-15(13)24-3/h9-10,12H,4-8,11,18H2,1-3H3,(H,19,21)	NTJOBXMMWNYJFB-UHFFFAOYSA-N	3	0.14362	1.33276	1.33789	10.7348	Elbe	HMP/VMP
Amisulpride	71675-85-9	pos	2022	E2	365	[M+H]+	InChI=1S/C17H27N3O4S/c1-4-20-8-6-7-12(20)11-19-17(21)13-9-16(25(22,23)5-2)14(18)10-15(13)24-3/h9-10,12H,4-8,11,18H2,1-3H3,(H,19,21)	NTJOBXMMWNYJFB-UHFFFAOYSA-N	3	0.110897	1.1697	1.17332	9.45153	Elbe	HMP/VMP
Amisulpride	71675-85-9	pos	2022	Mu	365	[M+H]+	InChI=1S/C17H27N3O4S/c1-4-20-8-6-7-12(20)11-19-17(21)13-9-16(25(22,23)5-2)14(18)10-15(13)24-3/h9-10,12H,4-8,11,18H2,1-3H3,(H,19,21)	NTJOBXMMWNYJFB-UHFFFAOYSA-N	3	0.0963154	0.822003	0.825632	11.6657	Mulde	HMP/VMP
Amisulpride	71675-85-9	pos	2022	R4	365	[M+H]+	InChI=1S/C17H27N3O4S/c1-4-20-8-6-7-12(20)11-19-17(21)13-9-16(25(22,23)5-2)14(18)10-15(13)24-3/h9-10,12H,4-8,11,18H2,1-3H3,(H,19,21)	NTJOBXMMWNYJFB-UHFFFAOYSA-N	3	0.0439729	1.30004	1.30054	3.38111	Rhine	HMP/VMP
Amisulpride	71675-85-9	pos	2022	R3	365	[M+H]+	InChI=1S/C17H27N3O4S/c1-4-20-8-6-7-12(20)11-19-17(21)13-9-16(25(22,23)5-2)14(18)10-15(13)24-3/h9-10,12H,4-8,11,18H2,1-3H3,(H,19,21)	NTJOBXMMWNYJFB-UHFFFAOYSA-N	3	0.0449329	1.25609	1.25662	3.57569	Rhine	HMP/VMP
Amisulpride	71675-85-9	pos	2022	R1	365	[M+H]+	InChI=1S/C17H27N3O4S/c1-4-20-8-6-7-12(20)11-19-17(21)13-9-16(25(22,23)5-2)14(18)10-15(13)24-3/h9-10,12H,4-8,11,18H2,1-3H3,(H,19,21)	NTJOBXMMWNYJFB-UHFFFAOYSA-N	3	0.00806357	0.31967	0.319738	2.52194	Rhine	HMP/VMP
Amisulpride	71675-85-9	pos	2022	Sa	365	[M+H]+	InChI=1S/C17H27N3O4S/c1-4-20-8-6-7-12(20)11-19-17(21)13-9-16(25(22,23)5-2)14(18)10-15(13)24-3/h9-10,12H,4-8,11,18H2,1-3H3,(H,19,21)	NTJOBXMMWNYJFB-UHFFFAOYSA-N	3	0.195346	3.28409	3.28798	5.94122	Saale	HMP/VMP
Amisulpride	71675-85-9	pos	2022	S1	365	[M+H]+	InChI=1S/C17H27N3O4S/c1-4-20-8-6-7-12(20)11-19-17(21)13-9-16(25(22,23)5-2)14(18)10-15(13)24-3/h9-10,12H,4-8,11,18H2,1-3H3,(H,19,21)	NTJOBXMMWNYJFB-UHFFFAOYSA-N	2	0.259342	1.50164	1.51279	17.1433	Saar	HMP/VMP
Amisulpride	71675-85-9	pos	2022	S2	365	[M+H]+	InChI=1S/C17H27N3O4S/c1-4-20-8-6-7-12(20)11-19-17(21)13-9-16(25(22,23)5-2)14(18)10-15(13)24-3/h9-10,12H,4-8,11,18H2,1-3H3,(H,19,21)	NTJOBXMMWNYJFB-UHFFFAOYSA-N	3	0.074351	1.36081	1.36217	5.45829	Saar	HMP/VMP
Avobenzone	70356-09-1	pos	2005	E5	365	[M+H]+	InChI=1S/C20H22O3/c1-20(2,3)16-9-5-14(6-10-16)18(21)13-19(22)15-7-11-17(23-4)12-8-15/h5-12H,13H2,1-4H3	XNEFYCZVKIDDMS-UHFFFAOYSA-N	3	0.0453721	0.154167	0.159059	28.5254	Elbe	cosmetics
Avobenzone	70356-09-1	pos	2005	E4	365	[M+H]+	InChI=1S/C20H22O3/c1-20(2,3)16-9-5-14(6-10-16)18(21)13-19(22)15-7-11-17(23-4)12-8-15/h5-12H,13H2,1-4H3	XNEFYCZVKIDDMS-UHFFFAOYSA-N	3	0.103938	0.13134	0.151728	68.5027	Elbe	cosmetics
Avobenzone	70356-09-1	pos	2005	E1	365	[M+H]+	InChI=1S/C20H22O3/c1-20(2,3)16-9-5-14(6-10-16)18(21)13-19(22)15-7-11-17(23-4)12-8-15/h5-12H,13H2,1-4H3	XNEFYCZVKIDDMS-UHFFFAOYSA-N	3	0.0493792	0.727878	0.729014	6.77343	Elbe	cosmetics
Avobenzone	70356-09-1	pos	2005	E2	365	[M+H]+	InChI=1S/C20H22O3/c1-20(2,3)16-9-5-14(6-10-16)18(21)13-19(22)15-7-11-17(23-4)12-8-15/h5-12H,13H2,1-4H3	XNEFYCZVKIDDMS-UHFFFAOYSA-N	3	0.0629647	0.62018	0.622345	10.1173	Elbe	cosmetics
Avobenzone	70356-09-1	pos	2005	Mu	365	[M+H]+	InChI=1S/C20H22O3/c1-20(2,3)16-9-5-14(6-10-16)18(21)13-19(22)15-7-11-17(23-4)12-8-15/h5-12H,13H2,1-4H3	XNEFYCZVKIDDMS-UHFFFAOYSA-N	3	0.0254037	0.246881	0.247748	10.2539	Mulde	cosmetics
Avobenzone	70356-09-1	pos	2005	R4	365	[M+H]+	InChI=1S/C20H22O3/c1-20(2,3)16-9-5-14(6-10-16)18(21)13-19(22)15-7-11-17(23-4)12-8-15/h5-12H,13H2,1-4H3	XNEFYCZVKIDDMS-UHFFFAOYSA-N	3	0.140585	0.968942	0.976116	14.4025	Rhine	cosmetics
Avobenzone	70356-09-1	pos	2005	R3	365	[M+H]+	InChI=1S/C20H22O3/c1-20(2,3)16-9-5-14(6-10-16)18(21)13-19(22)15-7-11-17(23-4)12-8-15/h5-12H,13H2,1-4H3	XNEFYCZVKIDDMS-UHFFFAOYSA-N	3	0.121894	0.635077	0.642316	18.9773	Rhine	cosmetics
Avobenzone	70356-09-1	pos	2005	R1	365	[M+H]+	InChI=1S/C20H22O3/c1-20(2,3)16-9-5-14(6-10-16)18(21)13-19(22)15-7-11-17(23-4)12-8-15/h5-12H,13H2,1-4H3	XNEFYCZVKIDDMS-UHFFFAOYSA-N	3	0.516247	1.35056	1.42295	36.28	Rhine	cosmetics
Avobenzone	70356-09-1	pos	2005	Sa	365	[M+H]+	InChI=1S/C20H22O3/c1-20(2,3)16-9-5-14(6-10-16)18(21)13-19(22)15-7-11-17(23-4)12-8-15/h5-12H,13H2,1-4H3	XNEFYCZVKIDDMS-UHFFFAOYSA-N	3	0.505081	1.05705	1.1504	43.9048	Saale	cosmetics
Avobenzone	70356-09-1	pos	2006	E5	365	[M+H]+	InChI=1S/C20H22O3/c1-20(2,3)16-9-5-14(6-10-16)18(21)13-19(22)15-7-11-17(23-4)12-8-15/h5-12H,13H2,1-4H3	XNEFYCZVKIDDMS-UHFFFAOYSA-N	3	0.0733193	0.20576	0.215263	34.0604	Elbe	cosmetics
Avobenzone	70356-09-1	pos	2006	E4	365	[M+H]+	InChI=1S/C20H22O3/c1-20(2,3)16-9-5-14(6-10-16)18(21)13-19(22)15-7-11-17(23-4)12-8-15/h5-12H,13H2,1-4H3	XNEFYCZVKIDDMS-UHFFFAOYSA-N	3	0.0518374	0.136031	0.141881	36.5358	Elbe	cosmetics
Avobenzone	70356-09-1	pos	2006	E1	365	[M+H]+	InChI=1S/C20H22O3/c1-20(2,3)16-9-5-14(6-10-16)18(21)13-19(22)15-7-11-17(23-4)12-8-15/h5-12H,13H2,1-4H3	XNEFYCZVKIDDMS-UHFFFAOYSA-N	3	0.192397	0.923431	0.93607	20.5537	Elbe	cosmetics
Avobenzone	70356-09-1	pos	2006	E2	365	[M+H]+	InChI=1S/C20H22O3/c1-20(2,3)16-9-5-14(6-10-16)18(21)13-19(22)15-7-11-17(23-4)12-8-15/h5-12H,13H2,1-4H3	XNEFYCZVKIDDMS-UHFFFAOYSA-N	3	0.0455386	0.436352	0.437927	10.3987	Elbe	cosmetics
Avobenzone	70356-09-1	pos	2006	Mu	365	[M+H]+	InChI=1S/C20H22O3/c1-20(2,3)16-9-5-14(6-10-16)18(21)13-19(22)15-7-11-17(23-4)12-8-15/h5-12H,13H2,1-4H3	XNEFYCZVKIDDMS-UHFFFAOYSA-N	3	0.339261	0.431442	0.497404	68.2063	Mulde	cosmetics
Avobenzone	70356-09-1	pos	2006	R4	365	[M+H]+	InChI=1S/C20H22O3/c1-20(2,3)16-9-5-14(6-10-16)18(21)13-19(22)15-7-11-17(23-4)12-8-15/h5-12H,13H2,1-4H3	XNEFYCZVKIDDMS-UHFFFAOYSA-N	3	0.0707976	1.48883	1.48994	4.75172	Rhine	cosmetics
Avobenzone	70356-09-1	pos	2006	R3	365	[M+H]+	InChI=1S/C20H22O3/c1-20(2,3)16-9-5-14(6-10-16)18(21)13-19(22)15-7-11-17(23-4)12-8-15/h5-12H,13H2,1-4H3	XNEFYCZVKIDDMS-UHFFFAOYSA-N	3	0.285257	1.32155	1.34285	21.2426	Rhine	cosmetics
Avobenzone	70356-09-1	pos	2006	R1	365	[M+H]+	InChI=1S/C20H22O3/c1-20(2,3)16-9-5-14(6-10-16)18(21)13-19(22)15-7-11-17(23-4)12-8-15/h5-12H,13H2,1-4H3	XNEFYCZVKIDDMS-UHFFFAOYSA-N	3	0.280649	1.38895	1.40924	19.9149	Rhine	cosmetics
Avobenzone	70356-09-1	pos	2006	Sa	365	[M+H]+	InChI=1S/C20H22O3/c1-20(2,3)16-9-5-14(6-10-16)18(21)13-19(22)15-7-11-17(23-4)12-8-15/h5-12H,13H2,1-4H3	XNEFYCZVKIDDMS-UHFFFAOYSA-N	3	0.221835	0.873306	0.893111	24.8385	Saale	cosmetics
Avobenzone	70356-09-1	pos	2006	S1	365	[M+H]+	InChI=1S/C20H22O3/c1-20(2,3)16-9-5-14(6-10-16)18(21)13-19(22)15-7-11-17(23-4)12-8-15/h5-12H,13H2,1-4H3	XNEFYCZVKIDDMS-UHFFFAOYSA-N	3	0.248719	2.45258	2.46067	10.1078	Saar	cosmetics
Avobenzone	70356-09-1	pos	2006	S2	365	[M+H]+	InChI=1S/C20H22O3/c1-20(2,3)16-9-5-14(6-10-16)18(21)13-19(22)15-7-11-17(23-4)12-8-15/h5-12H,13H2,1-4H3	XNEFYCZVKIDDMS-UHFFFAOYSA-N	3	0.695134	3.72135	3.76628	18.4568	Saar	cosmetics
Avobenzone	70356-09-1	pos	2007	E5	365	[M+H]+	InChI=1S/C20H22O3/c1-20(2,3)16-9-5-14(6-10-16)18(21)13-19(22)15-7-11-17(23-4)12-8-15/h5-12H,13H2,1-4H3	XNEFYCZVKIDDMS-UHFFFAOYSA-N	3	0.145035	0.343174	0.360683	40.2111	Elbe	cosmetics
Avobenzone	70356-09-1	pos	2007	E4	365	[M+H]+	InChI=1S/C20H22O3/c1-20(2,3)16-9-5-14(6-10-16)18(21)13-19(22)15-7-11-17(23-4)12-8-15/h5-12H,13H2,1-4H3	XNEFYCZVKIDDMS-UHFFFAOYSA-N	3	0.147459	0.176223	0.212235	69.4791	Elbe	cosmetics
Avobenzone	70356-09-1	pos	2007	E1	365	[M+H]+	InChI=1S/C20H22O3/c1-20(2,3)16-9-5-14(6-10-16)18(21)13-19(22)15-7-11-17(23-4)12-8-15/h5-12H,13H2,1-4H3	XNEFYCZVKIDDMS-UHFFFAOYSA-N	3	0.368476	1.41367	1.44869	25.4351	Elbe	cosmetics
Avobenzone	70356-09-1	pos	2007	E2	365	[M+H]+	InChI=1S/C20H22O3/c1-20(2,3)16-9-5-14(6-10-16)18(21)13-19(22)15-7-11-17(23-4)12-8-15/h5-12H,13H2,1-4H3	XNEFYCZVKIDDMS-UHFFFAOYSA-N	3	0.180339	1.06514	1.07573	16.7643	Elbe	cosmetics
Avobenzone	70356-09-1	pos	2007	Mu	365	[M+H]+	InChI=1S/C20H22O3/c1-20(2,3)16-9-5-14(6-10-16)18(21)13-19(22)15-7-11-17(23-4)12-8-15/h5-12H,13H2,1-4H3	XNEFYCZVKIDDMS-UHFFFAOYSA-N	3	0.0378421	0.242776	0.244644	15.4683	Mulde	cosmetics
Avobenzone	70356-09-1	pos	2007	R4	365	[M+H]+	InChI=1S/C20H22O3/c1-20(2,3)16-9-5-14(6-10-16)18(21)13-19(22)15-7-11-17(23-4)12-8-15/h5-12H,13H2,1-4H3	XNEFYCZVKIDDMS-UHFFFAOYSA-N	3	0.138279	2.33757	2.34031	5.90855	Rhine	cosmetics
Avobenzone	70356-09-1	pos	2007	R3	365	[M+H]+	InChI=1S/C20H22O3/c1-20(2,3)16-9-5-14(6-10-16)18(21)13-19(22)15-7-11-17(23-4)12-8-15/h5-12H,13H2,1-4H3	XNEFYCZVKIDDMS-UHFFFAOYSA-N	3	0.0479398	1.79811	1.79853	2.6655	Rhine	cosmetics
Avobenzone	70356-09-1	pos	2007	R1	365	[M+H]+	InChI=1S/C20H22O3/c1-20(2,3)16-9-5-14(6-10-16)18(21)13-19(22)15-7-11-17(23-4)12-8-15/h5-12H,13H2,1-4H3	XNEFYCZVKIDDMS-UHFFFAOYSA-N	3	0.815506	1.90642	2.01228	40.5266	Rhine	cosmetics
Avobenzone	70356-09-1	pos	2007	Sa	365	[M+H]+	InChI=1S/C20H22O3/c1-20(2,3)16-9-5-14(6-10-16)18(21)13-19(22)15-7-11-17(23-4)12-8-15/h5-12H,13H2,1-4H3	XNEFYCZVKIDDMS-UHFFFAOYSA-N	3	0.491402	1.70258	1.75143	28.0571	Saale	cosmetics
Avobenzone	70356-09-1	pos	2007	S1	365	[M+H]+	InChI=1S/C20H22O3/c1-20(2,3)16-9-5-14(6-10-16)18(21)13-19(22)15-7-11-17(23-4)12-8-15/h5-12H,13H2,1-4H3	XNEFYCZVKIDDMS-UHFFFAOYSA-N	3	0.642955	2.57041	2.62136	24.5275	Saar	cosmetics
Avobenzone	70356-09-1	pos	2007	S2	365	[M+H]+	InChI=1S/C20H22O3/c1-20(2,3)16-9-5-14(6-10-16)18(21)13-19(22)15-7-11-17(23-4)12-8-15/h5-12H,13H2,1-4H3	XNEFYCZVKIDDMS-UHFFFAOYSA-N	3	1.01059	6.71943	6.77098	14.9254	Saar	cosmetics
Avobenzone	70356-09-1	pos	2008	E5	365	[M+H]+	InChI=1S/C20H22O3/c1-20(2,3)16-9-5-14(6-10-16)18(21)13-19(22)15-7-11-17(23-4)12-8-15/h5-12H,13H2,1-4H3	XNEFYCZVKIDDMS-UHFFFAOYSA-N	3	0.0223245	0.70455	0.704783	3.16757	Elbe	cosmetics
Avobenzone	70356-09-1	pos	2008	E4	365	[M+H]+	InChI=1S/C20H22O3/c1-20(2,3)16-9-5-14(6-10-16)18(21)13-19(22)15-7-11-17(23-4)12-8-15/h5-12H,13H2,1-4H3	XNEFYCZVKIDDMS-UHFFFAOYSA-N	3	0.286774	0.331823	0.395002	72.6006	Elbe	cosmetics
Avobenzone	70356-09-1	pos	2008	E1	365	[M+H]+	InChI=1S/C20H22O3/c1-20(2,3)16-9-5-14(6-10-16)18(21)13-19(22)15-7-11-17(23-4)12-8-15/h5-12H,13H2,1-4H3	XNEFYCZVKIDDMS-UHFFFAOYSA-N	3	0.161906	1.67851	1.68372	9.61599	Elbe	cosmetics
Avobenzone	70356-09-1	pos	2008	E2	365	[M+H]+	InChI=1S/C20H22O3/c1-20(2,3)16-9-5-14(6-10-16)18(21)13-19(22)15-7-11-17(23-4)12-8-15/h5-12H,13H2,1-4H3	XNEFYCZVKIDDMS-UHFFFAOYSA-N	3	0.200232	1.16661	1.17866	16.9882	Elbe	cosmetics
Avobenzone	70356-09-1	pos	2008	Mu	365	[M+H]+	InChI=1S/C20H22O3/c1-20(2,3)16-9-5-14(6-10-16)18(21)13-19(22)15-7-11-17(23-4)12-8-15/h5-12H,13H2,1-4H3	XNEFYCZVKIDDMS-UHFFFAOYSA-N	3	0.0277259	0.309934	0.310765	8.92181	Mulde	cosmetics
Avobenzone	70356-09-1	pos	2008	R4	365	[M+H]+	InChI=1S/C20H22O3/c1-20(2,3)16-9-5-14(6-10-16)18(21)13-19(22)15-7-11-17(23-4)12-8-15/h5-12H,13H2,1-4H3	XNEFYCZVKIDDMS-UHFFFAOYSA-N	3	0.295198	2.20854	2.22138	13.2889	Rhine	cosmetics
Avobenzone	70356-09-1	pos	2008	R3	365	[M+H]+	InChI=1S/C20H22O3/c1-20(2,3)16-9-5-14(6-10-16)18(21)13-19(22)15-7-11-17(23-4)12-8-15/h5-12H,13H2,1-4H3	XNEFYCZVKIDDMS-UHFFFAOYSA-N	3	1.35483	2.42709	2.62921	51.5299	Rhine	cosmetics
Avobenzone	70356-09-1	pos	2008	R1	365	[M+H]+	InChI=1S/C20H22O3/c1-20(2,3)16-9-5-14(6-10-16)18(21)13-19(22)15-7-11-17(23-4)12-8-15/h5-12H,13H2,1-4H3	XNEFYCZVKIDDMS-UHFFFAOYSA-N	3	0.475315	1.13944	1.19775	39.6839	Rhine	cosmetics
Avobenzone	70356-09-1	pos	2008	Sa	365	[M+H]+	InChI=1S/C20H22O3/c1-20(2,3)16-9-5-14(6-10-16)18(21)13-19(22)15-7-11-17(23-4)12-8-15/h5-12H,13H2,1-4H3	XNEFYCZVKIDDMS-UHFFFAOYSA-N	3	0.357483	1.42029	1.45286	24.6054	Saale	cosmetics
Avobenzone	70356-09-1	pos	2008	S1	365	[M+H]+	InChI=1S/C20H22O3/c1-20(2,3)16-9-5-14(6-10-16)18(21)13-19(22)15-7-11-17(23-4)12-8-15/h5-12H,13H2,1-4H3	XNEFYCZVKIDDMS-UHFFFAOYSA-N	3	1.3387	2.95607	3.18954	41.9717	Saar	cosmetics
Avobenzone	70356-09-1	pos	2008	S2	365	[M+H]+	InChI=1S/C20H22O3/c1-20(2,3)16-9-5-14(6-10-16)18(21)13-19(22)15-7-11-17(23-4)12-8-15/h5-12H,13H2,1-4H3	XNEFYCZVKIDDMS-UHFFFAOYSA-N	3	1.70483	5.62462	5.809	29.348	Saar	cosmetics
Avobenzone	70356-09-1	pos	2009	D3	365	[M+H]+	InChI=1S/C20H22O3/c1-20(2,3)16-9-5-14(6-10-16)18(21)13-19(22)15-7-11-17(23-4)12-8-15/h5-12H,13H2,1-4H3	XNEFYCZVKIDDMS-UHFFFAOYSA-N	3	0.23069	0.535741	0.565398	40.8013	Danube	cosmetics
Avobenzone	70356-09-1	pos	2009	D1	365	[M+H]+	InChI=1S/C20H22O3/c1-20(2,3)16-9-5-14(6-10-16)18(21)13-19(22)15-7-11-17(23-4)12-8-15/h5-12H,13H2,1-4H3	XNEFYCZVKIDDMS-UHFFFAOYSA-N	3	0.349902	1.26942	1.29871	26.9423	Danube	cosmetics
Avobenzone	70356-09-1	pos	2009	E5	365	[M+H]+	InChI=1S/C20H22O3/c1-20(2,3)16-9-5-14(6-10-16)18(21)13-19(22)15-7-11-17(23-4)12-8-15/h5-12H,13H2,1-4H3	XNEFYCZVKIDDMS-UHFFFAOYSA-N	3	0.0420414	0.292478	0.294504	14.2753	Elbe	cosmetics
Avobenzone	70356-09-1	pos	2009	E4	365	[M+H]+	InChI=1S/C20H22O3/c1-20(2,3)16-9-5-14(6-10-16)18(21)13-19(22)15-7-11-17(23-4)12-8-15/h5-12H,13H2,1-4H3	XNEFYCZVKIDDMS-UHFFFAOYSA-N	3	0.252246	0.362396	0.406757	62.0141	Elbe	cosmetics
Avobenzone	70356-09-1	pos	2009	E1	365	[M+H]+	InChI=1S/C20H22O3/c1-20(2,3)16-9-5-14(6-10-16)18(21)13-19(22)15-7-11-17(23-4)12-8-15/h5-12H,13H2,1-4H3	XNEFYCZVKIDDMS-UHFFFAOYSA-N	3	0.423159	1.67158	1.70571	24.8085	Elbe	cosmetics
Avobenzone	70356-09-1	pos	2009	E2	365	[M+H]+	InChI=1S/C20H22O3/c1-20(2,3)16-9-5-14(6-10-16)18(21)13-19(22)15-7-11-17(23-4)12-8-15/h5-12H,13H2,1-4H3	XNEFYCZVKIDDMS-UHFFFAOYSA-N	3	0.107036	0.921737	0.92596	11.5595	Elbe	cosmetics
Avobenzone	70356-09-1	pos	2009	Mu	365	[M+H]+	InChI=1S/C20H22O3/c1-20(2,3)16-9-5-14(6-10-16)18(21)13-19(22)15-7-11-17(23-4)12-8-15/h5-12H,13H2,1-4H3	XNEFYCZVKIDDMS-UHFFFAOYSA-N	3	0.18928	0.529051	0.548857	34.4863	Mulde	cosmetics
Avobenzone	70356-09-1	pos	2009	R4	365	[M+H]+	InChI=1S/C20H22O3/c1-20(2,3)16-9-5-14(6-10-16)18(21)13-19(22)15-7-11-17(23-4)12-8-15/h5-12H,13H2,1-4H3	XNEFYCZVKIDDMS-UHFFFAOYSA-N	3	0.0970462	1.87122	1.87293	5.18153	Rhine	cosmetics
Avobenzone	70356-09-1	pos	2009	R3	365	[M+H]+	InChI=1S/C20H22O3/c1-20(2,3)16-9-5-14(6-10-16)18(21)13-19(22)15-7-11-17(23-4)12-8-15/h5-12H,13H2,1-4H3	XNEFYCZVKIDDMS-UHFFFAOYSA-N	3	0.35287	2.21862	2.23665	15.7767	Rhine	cosmetics
Avobenzone	70356-09-1	pos	2009	R1	365	[M+H]+	InChI=1S/C20H22O3/c1-20(2,3)16-9-5-14(6-10-16)18(21)13-19(22)15-7-11-17(23-4)12-8-15/h5-12H,13H2,1-4H3	XNEFYCZVKIDDMS-UHFFFAOYSA-N	3	0.48784	2.41412	2.44513	19.9515	Rhine	cosmetics
Avobenzone	70356-09-1	pos	2009	Sa	365	[M+H]+	InChI=1S/C20H22O3/c1-20(2,3)16-9-5-14(6-10-16)18(21)13-19(22)15-7-11-17(23-4)12-8-15/h5-12H,13H2,1-4H3	XNEFYCZVKIDDMS-UHFFFAOYSA-N	3	0.259492	1.31293	1.33128	19.4919	Saale	cosmetics
Avobenzone	70356-09-1	pos	2009	S1	365	[M+H]+	InChI=1S/C20H22O3/c1-20(2,3)16-9-5-14(6-10-16)18(21)13-19(22)15-7-11-17(23-4)12-8-15/h5-12H,13H2,1-4H3	XNEFYCZVKIDDMS-UHFFFAOYSA-N	3	1.01277	4.54702	4.62581	21.8939	Saar	cosmetics
Avobenzone	70356-09-1	pos	2009	S2	365	[M+H]+	InChI=1S/C20H22O3/c1-20(2,3)16-9-5-14(6-10-16)18(21)13-19(22)15-7-11-17(23-4)12-8-15/h5-12H,13H2,1-4H3	XNEFYCZVKIDDMS-UHFFFAOYSA-N	3	1.49339	7.1895	7.29734	20.4648	Saar	cosmetics
Avobenzone	70356-09-1	pos	2010	D3	365	[M+H]+	InChI=1S/C20H22O3/c1-20(2,3)16-9-5-14(6-10-16)18(21)13-19(22)15-7-11-17(23-4)12-8-15/h5-12H,13H2,1-4H3	XNEFYCZVKIDDMS-UHFFFAOYSA-N	3	0.255993	0.500536	0.536168	47.7449	Danube	cosmetics
Avobenzone	70356-09-1	pos	2010	D1	365	[M+H]+	InChI=1S/C20H22O3/c1-20(2,3)16-9-5-14(6-10-16)18(21)13-19(22)15-7-11-17(23-4)12-8-15/h5-12H,13H2,1-4H3	XNEFYCZVKIDDMS-UHFFFAOYSA-N	3	0.882198	1.46355	1.63468	53.9675	Danube	cosmetics
Avobenzone	70356-09-1	pos	2010	E5	365	[M+H]+	InChI=1S/C20H22O3/c1-20(2,3)16-9-5-14(6-10-16)18(21)13-19(22)15-7-11-17(23-4)12-8-15/h5-12H,13H2,1-4H3	XNEFYCZVKIDDMS-UHFFFAOYSA-N	3	0.0529332	0.628941	0.630407	8.39667	Elbe	cosmetics
Avobenzone	70356-09-1	pos	2010	E4	365	[M+H]+	InChI=1S/C20H22O3/c1-20(2,3)16-9-5-14(6-10-16)18(21)13-19(22)15-7-11-17(23-4)12-8-15/h5-12H,13H2,1-4H3	XNEFYCZVKIDDMS-UHFFFAOYSA-N	3	0.149917	0.305737	0.327044	45.8401	Elbe	cosmetics
Avobenzone	70356-09-1	pos	2010	E1	365	[M+H]+	InChI=1S/C20H22O3/c1-20(2,3)16-9-5-14(6-10-16)18(21)13-19(22)15-7-11-17(23-4)12-8-15/h5-12H,13H2,1-4H3	XNEFYCZVKIDDMS-UHFFFAOYSA-N	3	0.5637	1.48136	1.56266	36.0732	Elbe	cosmetics
Avobenzone	70356-09-1	pos	2010	E2	365	[M+H]+	InChI=1S/C20H22O3/c1-20(2,3)16-9-5-14(6-10-16)18(21)13-19(22)15-7-11-17(23-4)12-8-15/h5-12H,13H2,1-4H3	XNEFYCZVKIDDMS-UHFFFAOYSA-N	3	0.104423	1.04818	1.05153	9.93057	Elbe	cosmetics
Avobenzone	70356-09-1	pos	2010	Mu	365	[M+H]+	InChI=1S/C20H22O3/c1-20(2,3)16-9-5-14(6-10-16)18(21)13-19(22)15-7-11-17(23-4)12-8-15/h5-12H,13H2,1-4H3	XNEFYCZVKIDDMS-UHFFFAOYSA-N	3	0.0993612	0.462966	0.4696	21.1587	Mulde	cosmetics
Avobenzone	70356-09-1	pos	2010	R4	365	[M+H]+	InChI=1S/C20H22O3/c1-20(2,3)16-9-5-14(6-10-16)18(21)13-19(22)15-7-11-17(23-4)12-8-15/h5-12H,13H2,1-4H3	XNEFYCZVKIDDMS-UHFFFAOYSA-N	3	0.112864	2.36508	2.36691	4.76842	Rhine	cosmetics
Avobenzone	70356-09-1	pos	2010	R3	365	[M+H]+	InChI=1S/C20H22O3/c1-20(2,3)16-9-5-14(6-10-16)18(21)13-19(22)15-7-11-17(23-4)12-8-15/h5-12H,13H2,1-4H3	XNEFYCZVKIDDMS-UHFFFAOYSA-N	3	0.386998	3.01634	3.03209	12.7634	Rhine	cosmetics
Avobenzone	70356-09-1	pos	2010	R1	365	[M+H]+	InChI=1S/C20H22O3/c1-20(2,3)16-9-5-14(6-10-16)18(21)13-19(22)15-7-11-17(23-4)12-8-15/h5-12H,13H2,1-4H3	XNEFYCZVKIDDMS-UHFFFAOYSA-N	3	0.518339	1.67348	1.73187	29.9294	Rhine	cosmetics
Avobenzone	70356-09-1	pos	2010	Sa	365	[M+H]+	InChI=1S/C20H22O3/c1-20(2,3)16-9-5-14(6-10-16)18(21)13-19(22)15-7-11-17(23-4)12-8-15/h5-12H,13H2,1-4H3	XNEFYCZVKIDDMS-UHFFFAOYSA-N	3	0.413019	1.46576	1.50048	27.5257	Saale	cosmetics
Avobenzone	70356-09-1	pos	2010	S1	365	[M+H]+	InChI=1S/C20H22O3/c1-20(2,3)16-9-5-14(6-10-16)18(21)13-19(22)15-7-11-17(23-4)12-8-15/h5-12H,13H2,1-4H3	XNEFYCZVKIDDMS-UHFFFAOYSA-N	3	0.529492	4.93985	4.95851	10.6784	Saar	cosmetics
Avobenzone	70356-09-1	pos	2010	S2	365	[M+H]+	InChI=1S/C20H22O3/c1-20(2,3)16-9-5-14(6-10-16)18(21)13-19(22)15-7-11-17(23-4)12-8-15/h5-12H,13H2,1-4H3	XNEFYCZVKIDDMS-UHFFFAOYSA-N	3	1.47427	7.14027	7.23636	20.3731	Saar	cosmetics
Avobenzone	70356-09-1	pos	2011	D3	365	[M+H]+	InChI=1S/C20H22O3/c1-20(2,3)16-9-5-14(6-10-16)18(21)13-19(22)15-7-11-17(23-4)12-8-15/h5-12H,13H2,1-4H3	XNEFYCZVKIDDMS-UHFFFAOYSA-N	3	0.113405	0.432858	0.441889	25.6638	Danube	cosmetics
Avobenzone	70356-09-1	pos	2011	D1	365	[M+H]+	InChI=1S/C20H22O3/c1-20(2,3)16-9-5-14(6-10-16)18(21)13-19(22)15-7-11-17(23-4)12-8-15/h5-12H,13H2,1-4H3	XNEFYCZVKIDDMS-UHFFFAOYSA-N	3	0.775528	1.31471	1.45279	53.3818	Danube	cosmetics
Avobenzone	70356-09-1	pos	2011	E5	365	[M+H]+	InChI=1S/C20H22O3/c1-20(2,3)16-9-5-14(6-10-16)18(21)13-19(22)15-7-11-17(23-4)12-8-15/h5-12H,13H2,1-4H3	XNEFYCZVKIDDMS-UHFFFAOYSA-N	3	0.0168345	0.502287	0.502474	3.35032	Elbe	cosmetics
Avobenzone	70356-09-1	pos	2011	E4	365	[M+H]+	InChI=1S/C20H22O3/c1-20(2,3)16-9-5-14(6-10-16)18(21)13-19(22)15-7-11-17(23-4)12-8-15/h5-12H,13H2,1-4H3	XNEFYCZVKIDDMS-UHFFFAOYSA-N	3	0.0167972	0.172665	0.173198	9.69828	Elbe	cosmetics
Avobenzone	70356-09-1	pos	2011	E1	365	[M+H]+	InChI=1S/C20H22O3/c1-20(2,3)16-9-5-14(6-10-16)18(21)13-19(22)15-7-11-17(23-4)12-8-15/h5-12H,13H2,1-4H3	XNEFYCZVKIDDMS-UHFFFAOYSA-N	3	0.401426	1.69455	1.72908	23.2162	Elbe	cosmetics
Avobenzone	70356-09-1	pos	2011	E2	365	[M+H]+	InChI=1S/C20H22O3/c1-20(2,3)16-9-5-14(6-10-16)18(21)13-19(22)15-7-11-17(23-4)12-8-15/h5-12H,13H2,1-4H3	XNEFYCZVKIDDMS-UHFFFAOYSA-N	3	0.131112	0.80105	0.808402	16.2187	Elbe	cosmetics
Avobenzone	70356-09-1	pos	2011	Mu	365	[M+H]+	InChI=1S/C20H22O3/c1-20(2,3)16-9-5-14(6-10-16)18(21)13-19(22)15-7-11-17(23-4)12-8-15/h5-12H,13H2,1-4H3	XNEFYCZVKIDDMS-UHFFFAOYSA-N	2	0.166133	0.198478	0.230638	72.032	Mulde	cosmetics
Avobenzone	70356-09-1	pos	2011	R4	365	[M+H]+	InChI=1S/C20H22O3/c1-20(2,3)16-9-5-14(6-10-16)18(21)13-19(22)15-7-11-17(23-4)12-8-15/h5-12H,13H2,1-4H3	XNEFYCZVKIDDMS-UHFFFAOYSA-N	3	0.084455	1.26258	1.2645	6.67891	Rhine	cosmetics
Avobenzone	70356-09-1	pos	2011	R3	365	[M+H]+	InChI=1S/C20H22O3/c1-20(2,3)16-9-5-14(6-10-16)18(21)13-19(22)15-7-11-17(23-4)12-8-15/h5-12H,13H2,1-4H3	XNEFYCZVKIDDMS-UHFFFAOYSA-N	3	0.0116141	2.05944	2.05946	0.563941	Rhine	cosmetics
Avobenzone	70356-09-1	pos	2011	R1	365	[M+H]+	InChI=1S/C20H22O3/c1-20(2,3)16-9-5-14(6-10-16)18(21)13-19(22)15-7-11-17(23-4)12-8-15/h5-12H,13H2,1-4H3	XNEFYCZVKIDDMS-UHFFFAOYSA-N	3	1.25398	2.56472	2.73277	45.8867	Rhine	cosmetics
Avobenzone	70356-09-1	pos	2011	Sa	365	[M+H]+	InChI=1S/C20H22O3/c1-20(2,3)16-9-5-14(6-10-16)18(21)13-19(22)15-7-11-17(23-4)12-8-15/h5-12H,13H2,1-4H3	XNEFYCZVKIDDMS-UHFFFAOYSA-N	3	0.479208	1.37404	1.42754	33.5687	Saale	cosmetics
Avobenzone	70356-09-1	pos	2011	S1	365	[M+H]+	InChI=1S/C20H22O3/c1-20(2,3)16-9-5-14(6-10-16)18(21)13-19(22)15-7-11-17(23-4)12-8-15/h5-12H,13H2,1-4H3	XNEFYCZVKIDDMS-UHFFFAOYSA-N	3	0.374433	3.14995	3.16487	11.8309	Saar	cosmetics
Avobenzone	70356-09-1	pos	2011	S2	365	[M+H]+	InChI=1S/C20H22O3/c1-20(2,3)16-9-5-14(6-10-16)18(21)13-19(22)15-7-11-17(23-4)12-8-15/h5-12H,13H2,1-4H3	XNEFYCZVKIDDMS-UHFFFAOYSA-N	3	0.184781	6.1805	6.18236	2.98885	Saar	cosmetics
Avobenzone	70356-09-1	pos	2012	D3	365	[M+H]+	InChI=1S/C20H22O3/c1-20(2,3)16-9-5-14(6-10-16)18(21)13-19(22)15-7-11-17(23-4)12-8-15/h5-12H,13H2,1-4H3	XNEFYCZVKIDDMS-UHFFFAOYSA-N	3	0.0546459	0.576513	0.578219	9.45072	Danube	cosmetics
Avobenzone	70356-09-1	pos	2012	D1	365	[M+H]+	InChI=1S/C20H22O3/c1-20(2,3)16-9-5-14(6-10-16)18(21)13-19(22)15-7-11-17(23-4)12-8-15/h5-12H,13H2,1-4H3	XNEFYCZVKIDDMS-UHFFFAOYSA-N	3	0.57883	0.99373	1.10442	52.4102	Danube	cosmetics
Avobenzone	70356-09-1	pos	2012	E5	365	[M+H]+	InChI=1S/C20H22O3/c1-20(2,3)16-9-5-14(6-10-16)18(21)13-19(22)15-7-11-17(23-4)12-8-15/h5-12H,13H2,1-4H3	XNEFYCZVKIDDMS-UHFFFAOYSA-N	3	0.052881	0.334361	0.336984	15.6924	Elbe	cosmetics
Avobenzone	70356-09-1	pos	2012	E4	365	[M+H]+	InChI=1S/C20H22O3/c1-20(2,3)16-9-5-14(6-10-16)18(21)13-19(22)15-7-11-17(23-4)12-8-15/h5-12H,13H2,1-4H3	XNEFYCZVKIDDMS-UHFFFAOYSA-N	3	0.0480856	0.152728	0.15753	30.5248	Elbe	cosmetics
Avobenzone	70356-09-1	pos	2012	E1	365	[M+H]+	InChI=1S/C20H22O3/c1-20(2,3)16-9-5-14(6-10-16)18(21)13-19(22)15-7-11-17(23-4)12-8-15/h5-12H,13H2,1-4H3	XNEFYCZVKIDDMS-UHFFFAOYSA-N	3	0.428007	1.99725	2.02635	21.1221	Elbe	cosmetics
Avobenzone	70356-09-1	pos	2012	E2	365	[M+H]+	InChI=1S/C20H22O3/c1-20(2,3)16-9-5-14(6-10-16)18(21)13-19(22)15-7-11-17(23-4)12-8-15/h5-12H,13H2,1-4H3	XNEFYCZVKIDDMS-UHFFFAOYSA-N	3	0.231865	1.21977	1.23406	18.7888	Elbe	cosmetics
Avobenzone	70356-09-1	pos	2012	Mu	365	[M+H]+	InChI=1S/C20H22O3/c1-20(2,3)16-9-5-14(6-10-16)18(21)13-19(22)15-7-11-17(23-4)12-8-15/h5-12H,13H2,1-4H3	XNEFYCZVKIDDMS-UHFFFAOYSA-N	3	0.227425	0.537723	0.565528	40.2145	Mulde	cosmetics
Avobenzone	70356-09-1	pos	2012	R4	365	[M+H]+	InChI=1S/C20H22O3/c1-20(2,3)16-9-5-14(6-10-16)18(21)13-19(22)15-7-11-17(23-4)12-8-15/h5-12H,13H2,1-4H3	XNEFYCZVKIDDMS-UHFFFAOYSA-N	3	0.166296	1.79437	1.79943	9.24156	Rhine	cosmetics
Avobenzone	70356-09-1	pos	2012	R3	365	[M+H]+	InChI=1S/C20H22O3/c1-20(2,3)16-9-5-14(6-10-16)18(21)13-19(22)15-7-11-17(23-4)12-8-15/h5-12H,13H2,1-4H3	XNEFYCZVKIDDMS-UHFFFAOYSA-N	3	0.549502	2.37037	2.41025	22.7985	Rhine	cosmetics
Avobenzone	70356-09-1	pos	2012	R1	365	[M+H]+	InChI=1S/C20H22O3/c1-20(2,3)16-9-5-14(6-10-16)18(21)13-19(22)15-7-11-17(23-4)12-8-15/h5-12H,13H2,1-4H3	XNEFYCZVKIDDMS-UHFFFAOYSA-N	3	0.940377	2.28834	2.42364	38.8002	Rhine	cosmetics
Avobenzone	70356-09-1	pos	2012	Sa	365	[M+H]+	InChI=1S/C20H22O3/c1-20(2,3)16-9-5-14(6-10-16)18(21)13-19(22)15-7-11-17(23-4)12-8-15/h5-12H,13H2,1-4H3	XNEFYCZVKIDDMS-UHFFFAOYSA-N	3	0.686963	1.43218	1.52624	45.0101	Saale	cosmetics
Avobenzone	70356-09-1	pos	2012	S1	365	[M+H]+	InChI=1S/C20H22O3/c1-20(2,3)16-9-5-14(6-10-16)18(21)13-19(22)15-7-11-17(23-4)12-8-15/h5-12H,13H2,1-4H3	XNEFYCZVKIDDMS-UHFFFAOYSA-N	3	1.02043	3.82006	3.91986	26.0324	Saar	cosmetics
Avobenzone	70356-09-1	pos	2012	S2	365	[M+H]+	InChI=1S/C20H22O3/c1-20(2,3)16-9-5-14(6-10-16)18(21)13-19(22)15-7-11-17(23-4)12-8-15/h5-12H,13H2,1-4H3	XNEFYCZVKIDDMS-UHFFFAOYSA-N	3	1.13551	5.22398	5.31158	21.378	Saar	cosmetics
Avobenzone	70356-09-1	pos	2013	D3	365	[M+H]+	InChI=1S/C20H22O3/c1-20(2,3)16-9-5-14(6-10-16)18(21)13-19(22)15-7-11-17(23-4)12-8-15/h5-12H,13H2,1-4H3	XNEFYCZVKIDDMS-UHFFFAOYSA-N	3	0.0951114	0.607889	0.612665	15.5242	Danube	cosmetics
Avobenzone	70356-09-1	pos	2013	D1	365	[M+H]+	InChI=1S/C20H22O3/c1-20(2,3)16-9-5-14(6-10-16)18(21)13-19(22)15-7-11-17(23-4)12-8-15/h5-12H,13H2,1-4H3	XNEFYCZVKIDDMS-UHFFFAOYSA-N	3	0.394253	1.22977	1.27602	30.897	Danube	cosmetics
Avobenzone	70356-09-1	pos	2013	E5	365	[M+H]+	InChI=1S/C20H22O3/c1-20(2,3)16-9-5-14(6-10-16)18(21)13-19(22)15-7-11-17(23-4)12-8-15/h5-12H,13H2,1-4H3	XNEFYCZVKIDDMS-UHFFFAOYSA-N	3	0.0355289	0.285737	0.287258	12.3683	Elbe	cosmetics
Avobenzone	70356-09-1	pos	2013	E4	365	[M+H]+	InChI=1S/C20H22O3/c1-20(2,3)16-9-5-14(6-10-16)18(21)13-19(22)15-7-11-17(23-4)12-8-15/h5-12H,13H2,1-4H3	XNEFYCZVKIDDMS-UHFFFAOYSA-N	3	0.390605	0.410877	0.496364	78.6932	Elbe	cosmetics
Avobenzone	70356-09-1	pos	2013	E1	365	[M+H]+	InChI=1S/C20H22O3/c1-20(2,3)16-9-5-14(6-10-16)18(21)13-19(22)15-7-11-17(23-4)12-8-15/h5-12H,13H2,1-4H3	XNEFYCZVKIDDMS-UHFFFAOYSA-N	3	0.399567	2.21553	2.23908	17.8452	Elbe	cosmetics
Avobenzone	70356-09-1	pos	2013	E2	365	[M+H]+	InChI=1S/C20H22O3/c1-20(2,3)16-9-5-14(6-10-16)18(21)13-19(22)15-7-11-17(23-4)12-8-15/h5-12H,13H2,1-4H3	XNEFYCZVKIDDMS-UHFFFAOYSA-N	3	0.617387	2.06048	2.12865	29.0037	Elbe	cosmetics
Avobenzone	70356-09-1	pos	2013	Mu	365	[M+H]+	InChI=1S/C20H22O3/c1-20(2,3)16-9-5-14(6-10-16)18(21)13-19(22)15-7-11-17(23-4)12-8-15/h5-12H,13H2,1-4H3	XNEFYCZVKIDDMS-UHFFFAOYSA-N	3	0.113735	0.713841	0.720179	15.7926	Mulde	cosmetics
Avobenzone	70356-09-1	pos	2013	R4	365	[M+H]+	InChI=1S/C20H22O3/c1-20(2,3)16-9-5-14(6-10-16)18(21)13-19(22)15-7-11-17(23-4)12-8-15/h5-12H,13H2,1-4H3	XNEFYCZVKIDDMS-UHFFFAOYSA-N	3	0.105248	2.05949	2.0613	5.10589	Rhine	cosmetics
Avobenzone	70356-09-1	pos	2013	R3	365	[M+H]+	InChI=1S/C20H22O3/c1-20(2,3)16-9-5-14(6-10-16)18(21)13-19(22)15-7-11-17(23-4)12-8-15/h5-12H,13H2,1-4H3	XNEFYCZVKIDDMS-UHFFFAOYSA-N	3	0.121453	2.49902	2.50095	4.85627	Rhine	cosmetics
Avobenzone	70356-09-1	pos	2013	R1	365	[M+H]+	InChI=1S/C20H22O3/c1-20(2,3)16-9-5-14(6-10-16)18(21)13-19(22)15-7-11-17(23-4)12-8-15/h5-12H,13H2,1-4H3	XNEFYCZVKIDDMS-UHFFFAOYSA-N	3	1.28247	2.97067	3.16301	40.546	Rhine	cosmetics
Avobenzone	70356-09-1	pos	2013	Sa	365	[M+H]+	InChI=1S/C20H22O3/c1-20(2,3)16-9-5-14(6-10-16)18(21)13-19(22)15-7-11-17(23-4)12-8-15/h5-12H,13H2,1-4H3	XNEFYCZVKIDDMS-UHFFFAOYSA-N	3	0.835045	3.48933	3.55779	23.4709	Saale	cosmetics
Avobenzone	70356-09-1	pos	2013	S1	365	[M+H]+	InChI=1S/C20H22O3/c1-20(2,3)16-9-5-14(6-10-16)18(21)13-19(22)15-7-11-17(23-4)12-8-15/h5-12H,13H2,1-4H3	XNEFYCZVKIDDMS-UHFFFAOYSA-N	3	0.822041	5.12341	5.16471	15.9165	Saar	cosmetics
Avobenzone	70356-09-1	pos	2013	S2	365	[M+H]+	InChI=1S/C20H22O3/c1-20(2,3)16-9-5-14(6-10-16)18(21)13-19(22)15-7-11-17(23-4)12-8-15/h5-12H,13H2,1-4H3	XNEFYCZVKIDDMS-UHFFFAOYSA-N	3	0.447416	4.90576	4.91901	9.09566	Saar	cosmetics
Avobenzone	70356-09-1	pos	2014	D3	365	[M+H]+	InChI=1S/C20H22O3/c1-20(2,3)16-9-5-14(6-10-16)18(21)13-19(22)15-7-11-17(23-4)12-8-15/h5-12H,13H2,1-4H3	XNEFYCZVKIDDMS-UHFFFAOYSA-N	3	0.0407175	0.76926	0.769976	5.28815	Danube	cosmetics
Avobenzone	70356-09-1	pos	2014	D1	365	[M+H]+	InChI=1S/C20H22O3/c1-20(2,3)16-9-5-14(6-10-16)18(21)13-19(22)15-7-11-17(23-4)12-8-15/h5-12H,13H2,1-4H3	XNEFYCZVKIDDMS-UHFFFAOYSA-N	3	0.394798	1.72271	1.75542	22.4903	Danube	cosmetics
Avobenzone	70356-09-1	pos	2014	E5	365	[M+H]+	InChI=1S/C20H22O3/c1-20(2,3)16-9-5-14(6-10-16)18(21)13-19(22)15-7-11-17(23-4)12-8-15/h5-12H,13H2,1-4H3	XNEFYCZVKIDDMS-UHFFFAOYSA-N	3	0.0178187	0.153158	0.153879	11.5797	Elbe	cosmetics
Avobenzone	70356-09-1	pos	2014	E4	365	[M+H]+	InChI=1S/C20H22O3/c1-20(2,3)16-9-5-14(6-10-16)18(21)13-19(22)15-7-11-17(23-4)12-8-15/h5-12H,13H2,1-4H3	XNEFYCZVKIDDMS-UHFFFAOYSA-N	3	0.274687	0.309761	0.369046	74.4316	Elbe	cosmetics
Avobenzone	70356-09-1	pos	2014	E1	365	[M+H]+	InChI=1S/C20H22O3/c1-20(2,3)16-9-5-14(6-10-16)18(21)13-19(22)15-7-11-17(23-4)12-8-15/h5-12H,13H2,1-4H3	XNEFYCZVKIDDMS-UHFFFAOYSA-N	3	0.130287	2.83076	2.83277	4.59929	Elbe	cosmetics
Avobenzone	70356-09-1	pos	2014	E2	365	[M+H]+	InChI=1S/C20H22O3/c1-20(2,3)16-9-5-14(6-10-16)18(21)13-19(22)15-7-11-17(23-4)12-8-15/h5-12H,13H2,1-4H3	XNEFYCZVKIDDMS-UHFFFAOYSA-N	3	0.571099	2.07973	2.13265	26.7788	Elbe	cosmetics
Avobenzone	70356-09-1	pos	2014	Mu	365	[M+H]+	InChI=1S/C20H22O3/c1-20(2,3)16-9-5-14(6-10-16)18(21)13-19(22)15-7-11-17(23-4)12-8-15/h5-12H,13H2,1-4H3	XNEFYCZVKIDDMS-UHFFFAOYSA-N	3	0.144252	0.639674	0.651267	22.1495	Mulde	cosmetics
Avobenzone	70356-09-1	pos	2014	R4	365	[M+H]+	InChI=1S/C20H22O3/c1-20(2,3)16-9-5-14(6-10-16)18(21)13-19(22)15-7-11-17(23-4)12-8-15/h5-12H,13H2,1-4H3	XNEFYCZVKIDDMS-UHFFFAOYSA-N	3	0.133476	2.08545	2.08829	6.39162	Rhine	cosmetics
Avobenzone	70356-09-1	pos	2014	R3	365	[M+H]+	InChI=1S/C20H22O3/c1-20(2,3)16-9-5-14(6-10-16)18(21)13-19(22)15-7-11-17(23-4)12-8-15/h5-12H,13H2,1-4H3	XNEFYCZVKIDDMS-UHFFFAOYSA-N	2	0.296109	0.629847	0.663738	44.6124	Rhine	cosmetics
Avobenzone	70356-09-1	pos	2014	R1	365	[M+H]+	InChI=1S/C20H22O3/c1-20(2,3)16-9-5-14(6-10-16)18(21)13-19(22)15-7-11-17(23-4)12-8-15/h5-12H,13H2,1-4H3	XNEFYCZVKIDDMS-UHFFFAOYSA-N	3	1.69568	2.91585	3.17769	53.3619	Rhine	cosmetics
Avobenzone	70356-09-1	pos	2014	Sa	365	[M+H]+	InChI=1S/C20H22O3/c1-20(2,3)16-9-5-14(6-10-16)18(21)13-19(22)15-7-11-17(23-4)12-8-15/h5-12H,13H2,1-4H3	XNEFYCZVKIDDMS-UHFFFAOYSA-N	3	1.28639	4.53604	4.66574	27.571	Saale	cosmetics
Avobenzone	70356-09-1	pos	2014	S1	365	[M+H]+	InChI=1S/C20H22O3/c1-20(2,3)16-9-5-14(6-10-16)18(21)13-19(22)15-7-11-17(23-4)12-8-15/h5-12H,13H2,1-4H3	XNEFYCZVKIDDMS-UHFFFAOYSA-N	3	0.580355	4.81918	4.84343	11.9823	Saar	cosmetics
Avobenzone	70356-09-1	pos	2014	S2	365	[M+H]+	InChI=1S/C20H22O3/c1-20(2,3)16-9-5-14(6-10-16)18(21)13-19(22)15-7-11-17(23-4)12-8-15/h5-12H,13H2,1-4H3	XNEFYCZVKIDDMS-UHFFFAOYSA-N	3	1.0593	4.7723	4.85634	21.8128	Saar	cosmetics
Avobenzone	70356-09-1	pos	2015	D3	365	[M+H]+	InChI=1S/C20H22O3/c1-20(2,3)16-9-5-14(6-10-16)18(21)13-19(22)15-7-11-17(23-4)12-8-15/h5-12H,13H2,1-4H3	XNEFYCZVKIDDMS-UHFFFAOYSA-N	3	0.199013	0.772961	0.788773	25.2307	Danube	cosmetics
Avobenzone	70356-09-1	pos	2015	D1	365	[M+H]+	InChI=1S/C20H22O3/c1-20(2,3)16-9-5-14(6-10-16)18(21)13-19(22)15-7-11-17(23-4)12-8-15/h5-12H,13H2,1-4H3	XNEFYCZVKIDDMS-UHFFFAOYSA-N	3	0.482363	1.26094	1.32761	36.3331	Danube	cosmetics
Avobenzone	70356-09-1	pos	2015	E5	365	[M+H]+	InChI=1S/C20H22O3/c1-20(2,3)16-9-5-14(6-10-16)18(21)13-19(22)15-7-11-17(23-4)12-8-15/h5-12H,13H2,1-4H3	XNEFYCZVKIDDMS-UHFFFAOYSA-N	3	0.0267828	0.094451	0.0971122	27.5792	Elbe	cosmetics
Avobenzone	70356-09-1	pos	2015	E4	365	[M+H]+	InChI=1S/C20H22O3/c1-20(2,3)16-9-5-14(6-10-16)18(21)13-19(22)15-7-11-17(23-4)12-8-15/h5-12H,13H2,1-4H3	XNEFYCZVKIDDMS-UHFFFAOYSA-N	3	0.392365	0.318887	0.420009	93.4184	Elbe	cosmetics
Avobenzone	70356-09-1	pos	2015	E1	365	[M+H]+	InChI=1S/C20H22O3/c1-20(2,3)16-9-5-14(6-10-16)18(21)13-19(22)15-7-11-17(23-4)12-8-15/h5-12H,13H2,1-4H3	XNEFYCZVKIDDMS-UHFFFAOYSA-N	3	0.237098	2.64103	2.64837	8.95261	Elbe	cosmetics
Avobenzone	70356-09-1	pos	2015	E2	365	[M+H]+	InChI=1S/C20H22O3/c1-20(2,3)16-9-5-14(6-10-16)18(21)13-19(22)15-7-11-17(23-4)12-8-15/h5-12H,13H2,1-4H3	XNEFYCZVKIDDMS-UHFFFAOYSA-N	3	0.70377	3.0376	3.09527	22.737	Elbe	cosmetics
Avobenzone	70356-09-1	pos	2015	Mu	365	[M+H]+	InChI=1S/C20H22O3/c1-20(2,3)16-9-5-14(6-10-16)18(21)13-19(22)15-7-11-17(23-4)12-8-15/h5-12H,13H2,1-4H3	XNEFYCZVKIDDMS-UHFFFAOYSA-N	3	0.245521	0.795061	0.820552	29.9215	Mulde	cosmetics
Avobenzone	70356-09-1	pos	2015	R4	365	[M+H]+	InChI=1S/C20H22O3/c1-20(2,3)16-9-5-14(6-10-16)18(21)13-19(22)15-7-11-17(23-4)12-8-15/h5-12H,13H2,1-4H3	XNEFYCZVKIDDMS-UHFFFAOYSA-N	3	0.430293	2.67472	2.69909	15.9421	Rhine	cosmetics
Avobenzone	70356-09-1	pos	2015	R3	365	[M+H]+	InChI=1S/C20H22O3/c1-20(2,3)16-9-5-14(6-10-16)18(21)13-19(22)15-7-11-17(23-4)12-8-15/h5-12H,13H2,1-4H3	XNEFYCZVKIDDMS-UHFFFAOYSA-N	3	0.0700027	0.733119	0.735393	9.51908	Rhine	cosmetics
Avobenzone	70356-09-1	pos	2015	R1	365	[M+H]+	InChI=1S/C20H22O3/c1-20(2,3)16-9-5-14(6-10-16)18(21)13-19(22)15-7-11-17(23-4)12-8-15/h5-12H,13H2,1-4H3	XNEFYCZVKIDDMS-UHFFFAOYSA-N	3	0.556801	1.78528	1.84621	30.1591	Rhine	cosmetics
Avobenzone	70356-09-1	pos	2015	Sa	365	[M+H]+	InChI=1S/C20H22O3/c1-20(2,3)16-9-5-14(6-10-16)18(21)13-19(22)15-7-11-17(23-4)12-8-15/h5-12H,13H2,1-4H3	XNEFYCZVKIDDMS-UHFFFAOYSA-N	3	0.787378	3.92361	3.9778	19.7943	Saale	cosmetics
Avobenzone	70356-09-1	pos	2015	S1	365	[M+H]+	InChI=1S/C20H22O3/c1-20(2,3)16-9-5-14(6-10-16)18(21)13-19(22)15-7-11-17(23-4)12-8-15/h5-12H,13H2,1-4H3	XNEFYCZVKIDDMS-UHFFFAOYSA-N	3	0.957245	4.65412	4.7151	20.3017	Saar	cosmetics
Avobenzone	70356-09-1	pos	2015	S2	365	[M+H]+	InChI=1S/C20H22O3/c1-20(2,3)16-9-5-14(6-10-16)18(21)13-19(22)15-7-11-17(23-4)12-8-15/h5-12H,13H2,1-4H3	XNEFYCZVKIDDMS-UHFFFAOYSA-N	3	1.1309	4.29994	4.40634	25.6654	Saar	cosmetics
Avobenzone	70356-09-1	pos	2016	D3	365	[M+H]+	InChI=1S/C20H22O3/c1-20(2,3)16-9-5-14(6-10-16)18(21)13-19(22)15-7-11-17(23-4)12-8-15/h5-12H,13H2,1-4H3	XNEFYCZVKIDDMS-UHFFFAOYSA-N	3	0.153612	0.708787	0.719568	21.3478	Danube	cosmetics
Avobenzone	70356-09-1	pos	2016	D1	365	[M+H]+	InChI=1S/C20H22O3/c1-20(2,3)16-9-5-14(6-10-16)18(21)13-19(22)15-7-11-17(23-4)12-8-15/h5-12H,13H2,1-4H3	XNEFYCZVKIDDMS-UHFFFAOYSA-N	3	0.572174	1.28622	1.382	41.4019	Danube	cosmetics
Avobenzone	70356-09-1	pos	2016	E5	365	[M+H]+	InChI=1S/C20H22O3/c1-20(2,3)16-9-5-14(6-10-16)18(21)13-19(22)15-7-11-17(23-4)12-8-15/h5-12H,13H2,1-4H3	XNEFYCZVKIDDMS-UHFFFAOYSA-N	3	0.0193118	0.162631	0.16343	11.8166	Elbe	cosmetics
Avobenzone	70356-09-1	pos	2016	E4	365	[M+H]+	InChI=1S/C20H22O3/c1-20(2,3)16-9-5-14(6-10-16)18(21)13-19(22)15-7-11-17(23-4)12-8-15/h5-12H,13H2,1-4H3	XNEFYCZVKIDDMS-UHFFFAOYSA-N	3	0.297391	0.55491	0.59813	49.7201	Elbe	cosmetics
Avobenzone	70356-09-1	pos	2016	E1	365	[M+H]+	InChI=1S/C20H22O3/c1-20(2,3)16-9-5-14(6-10-16)18(21)13-19(22)15-7-11-17(23-4)12-8-15/h5-12H,13H2,1-4H3	XNEFYCZVKIDDMS-UHFFFAOYSA-N	3	0.721666	2.87853	2.93661	24.5748	Elbe	cosmetics
Avobenzone	70356-09-1	pos	2016	E2	365	[M+H]+	InChI=1S/C20H22O3/c1-20(2,3)16-9-5-14(6-10-16)18(21)13-19(22)15-7-11-17(23-4)12-8-15/h5-12H,13H2,1-4H3	XNEFYCZVKIDDMS-UHFFFAOYSA-N	3	0.717436	2.49236	2.5682	27.9353	Elbe	cosmetics
Avobenzone	70356-09-1	pos	2016	Mu	365	[M+H]+	InChI=1S/C20H22O3/c1-20(2,3)16-9-5-14(6-10-16)18(21)13-19(22)15-7-11-17(23-4)12-8-15/h5-12H,13H2,1-4H3	XNEFYCZVKIDDMS-UHFFFAOYSA-N	3	0.068374	1.18895	1.19026	5.74448	Mulde	cosmetics
Avobenzone	70356-09-1	pos	2016	R4	365	[M+H]+	InChI=1S/C20H22O3/c1-20(2,3)16-9-5-14(6-10-16)18(21)13-19(22)15-7-11-17(23-4)12-8-15/h5-12H,13H2,1-4H3	XNEFYCZVKIDDMS-UHFFFAOYSA-N	3	0.74453	3.54353	3.5971	20.698	Rhine	cosmetics
Avobenzone	70356-09-1	pos	2016	R3	365	[M+H]+	InChI=1S/C20H22O3/c1-20(2,3)16-9-5-14(6-10-16)18(21)13-19(22)15-7-11-17(23-4)12-8-15/h5-12H,13H2,1-4H3	XNEFYCZVKIDDMS-UHFFFAOYSA-N	3	0.286521	3.48788	3.49584	8.19606	Rhine	cosmetics
Avobenzone	70356-09-1	pos	2016	R1	365	[M+H]+	InChI=1S/C20H22O3/c1-20(2,3)16-9-5-14(6-10-16)18(21)13-19(22)15-7-11-17(23-4)12-8-15/h5-12H,13H2,1-4H3	XNEFYCZVKIDDMS-UHFFFAOYSA-N	3	0.287386	4.81669	4.82237	5.95943	Rhine	cosmetics
Avobenzone	70356-09-1	pos	2016	Sa	365	[M+H]+	InChI=1S/C20H22O3/c1-20(2,3)16-9-5-14(6-10-16)18(21)13-19(22)15-7-11-17(23-4)12-8-15/h5-12H,13H2,1-4H3	XNEFYCZVKIDDMS-UHFFFAOYSA-N	3	1.54841	4.90375	5.07266	30.5245	Saale	cosmetics
Avobenzone	70356-09-1	pos	2016	S1	365	[M+H]+	InChI=1S/C20H22O3/c1-20(2,3)16-9-5-14(6-10-16)18(21)13-19(22)15-7-11-17(23-4)12-8-15/h5-12H,13H2,1-4H3	XNEFYCZVKIDDMS-UHFFFAOYSA-N	3	0.332182	3.52284	3.53359	9.40068	Saar	cosmetics
Avobenzone	70356-09-1	pos	2016	S2	365	[M+H]+	InChI=1S/C20H22O3/c1-20(2,3)16-9-5-14(6-10-16)18(21)13-19(22)15-7-11-17(23-4)12-8-15/h5-12H,13H2,1-4H3	XNEFYCZVKIDDMS-UHFFFAOYSA-N	3	0.557414	6.51233	6.52785	8.53901	Saar	cosmetics
Avobenzone	70356-09-1	pos	2017	D3	365	[M+H]+	InChI=1S/C20H22O3/c1-20(2,3)16-9-5-14(6-10-16)18(21)13-19(22)15-7-11-17(23-4)12-8-15/h5-12H,13H2,1-4H3	XNEFYCZVKIDDMS-UHFFFAOYSA-N	3	0.0409915	0.908515	0.909142	4.50881	Danube	cosmetics
Avobenzone	70356-09-1	pos	2017	D1	365	[M+H]+	InChI=1S/C20H22O3/c1-20(2,3)16-9-5-14(6-10-16)18(21)13-19(22)15-7-11-17(23-4)12-8-15/h5-12H,13H2,1-4H3	XNEFYCZVKIDDMS-UHFFFAOYSA-N	3	0.388502	1.52272	1.55765	24.9415	Danube	cosmetics
Avobenzone	70356-09-1	pos	2017	E5	365	[M+H]+	InChI=1S/C20H22O3/c1-20(2,3)16-9-5-14(6-10-16)18(21)13-19(22)15-7-11-17(23-4)12-8-15/h5-12H,13H2,1-4H3	XNEFYCZVKIDDMS-UHFFFAOYSA-N	3	0.0397469	0.163833	0.167304	23.7572	Elbe	cosmetics
Avobenzone	70356-09-1	pos	2017	E4	365	[M+H]+	InChI=1S/C20H22O3/c1-20(2,3)16-9-5-14(6-10-16)18(21)13-19(22)15-7-11-17(23-4)12-8-15/h5-12H,13H2,1-4H3	XNEFYCZVKIDDMS-UHFFFAOYSA-N	2	0.541816	0.713812	0.810129	66.8802	Elbe	cosmetics
Avobenzone	70356-09-1	pos	2017	E1	365	[M+H]+	InChI=1S/C20H22O3/c1-20(2,3)16-9-5-14(6-10-16)18(21)13-19(22)15-7-11-17(23-4)12-8-15/h5-12H,13H2,1-4H3	XNEFYCZVKIDDMS-UHFFFAOYSA-N	3	0.738612	2.25985	2.34316	31.5221	Elbe	cosmetics
Avobenzone	70356-09-1	pos	2017	E2	365	[M+H]+	InChI=1S/C20H22O3/c1-20(2,3)16-9-5-14(6-10-16)18(21)13-19(22)15-7-11-17(23-4)12-8-15/h5-12H,13H2,1-4H3	XNEFYCZVKIDDMS-UHFFFAOYSA-N	3	1.36255	1.87738	2.2567	60.3779	Elbe	cosmetics
Avobenzone	70356-09-1	pos	2017	Mu	365	[M+H]+	InChI=1S/C20H22O3/c1-20(2,3)16-9-5-14(6-10-16)18(21)13-19(22)15-7-11-17(23-4)12-8-15/h5-12H,13H2,1-4H3	XNEFYCZVKIDDMS-UHFFFAOYSA-N	3	0.348306	1.11065	1.14896	30.3149	Mulde	cosmetics
Avobenzone	70356-09-1	pos	2017	R4	365	[M+H]+	InChI=1S/C20H22O3/c1-20(2,3)16-9-5-14(6-10-16)18(21)13-19(22)15-7-11-17(23-4)12-8-15/h5-12H,13H2,1-4H3	XNEFYCZVKIDDMS-UHFFFAOYSA-N	3	0.217153	3.47742	3.48192	6.23659	Rhine	cosmetics
Avobenzone	70356-09-1	pos	2017	R3	365	[M+H]+	InChI=1S/C20H22O3/c1-20(2,3)16-9-5-14(6-10-16)18(21)13-19(22)15-7-11-17(23-4)12-8-15/h5-12H,13H2,1-4H3	XNEFYCZVKIDDMS-UHFFFAOYSA-N	3	0.121841	3.83436	3.83564	3.17655	Rhine	cosmetics
Avobenzone	70356-09-1	pos	2017	R1	365	[M+H]+	InChI=1S/C20H22O3/c1-20(2,3)16-9-5-14(6-10-16)18(21)13-19(22)15-7-11-17(23-4)12-8-15/h5-12H,13H2,1-4H3	XNEFYCZVKIDDMS-UHFFFAOYSA-N	3	0.120674	2.86694	2.86861	4.2067	Rhine	cosmetics
Avobenzone	70356-09-1	pos	2017	Sa	365	[M+H]+	InChI=1S/C20H22O3/c1-20(2,3)16-9-5-14(6-10-16)18(21)13-19(22)15-7-11-17(23-4)12-8-15/h5-12H,13H2,1-4H3	XNEFYCZVKIDDMS-UHFFFAOYSA-N	3	0.685556	4.22585	4.26431	16.0766	Saale	cosmetics
Avobenzone	70356-09-1	pos	2017	S1	365	[M+H]+	InChI=1S/C20H22O3/c1-20(2,3)16-9-5-14(6-10-16)18(21)13-19(22)15-7-11-17(23-4)12-8-15/h5-12H,13H2,1-4H3	XNEFYCZVKIDDMS-UHFFFAOYSA-N	3	0.393358	3.57979	3.5942	10.9442	Saar	cosmetics
Avobenzone	70356-09-1	pos	2017	S2	365	[M+H]+	InChI=1S/C20H22O3/c1-20(2,3)16-9-5-14(6-10-16)18(21)13-19(22)15-7-11-17(23-4)12-8-15/h5-12H,13H2,1-4H3	XNEFYCZVKIDDMS-UHFFFAOYSA-N	3	0.682605	6.10486	6.13024	11.135	Saar	cosmetics
Avobenzone	70356-09-1	pos	2018	D3	365	[M+H]+	InChI=1S/C20H22O3/c1-20(2,3)16-9-5-14(6-10-16)18(21)13-19(22)15-7-11-17(23-4)12-8-15/h5-12H,13H2,1-4H3	XNEFYCZVKIDDMS-UHFFFAOYSA-N	3	0.127293	0.744016	0.750817	16.954	Danube	cosmetics
Avobenzone	70356-09-1	pos	2018	D1	365	[M+H]+	InChI=1S/C20H22O3/c1-20(2,3)16-9-5-14(6-10-16)18(21)13-19(22)15-7-11-17(23-4)12-8-15/h5-12H,13H2,1-4H3	XNEFYCZVKIDDMS-UHFFFAOYSA-N	3	0.0930962	2.08519	2.08658	4.46167	Danube	cosmetics
Avobenzone	70356-09-1	pos	2018	E5	365	[M+H]+	InChI=1S/C20H22O3/c1-20(2,3)16-9-5-14(6-10-16)18(21)13-19(22)15-7-11-17(23-4)12-8-15/h5-12H,13H2,1-4H3	XNEFYCZVKIDDMS-UHFFFAOYSA-N	2	0.00574305	0.160361	0.160413	3.58017	Elbe	cosmetics
Avobenzone	70356-09-1	pos	2018	E1	365	[M+H]+	InChI=1S/C20H22O3/c1-20(2,3)16-9-5-14(6-10-16)18(21)13-19(22)15-7-11-17(23-4)12-8-15/h5-12H,13H2,1-4H3	XNEFYCZVKIDDMS-UHFFFAOYSA-N	3	0.250876	3.46264	3.46875	7.23246	Elbe	cosmetics
Avobenzone	70356-09-1	pos	2018	E2	365	[M+H]+	InChI=1S/C20H22O3/c1-20(2,3)16-9-5-14(6-10-16)18(21)13-19(22)15-7-11-17(23-4)12-8-15/h5-12H,13H2,1-4H3	XNEFYCZVKIDDMS-UHFFFAOYSA-N	3	0.149533	2.34969	2.35292	6.3552	Elbe	cosmetics
Avobenzone	70356-09-1	pos	2018	Mu	365	[M+H]+	InChI=1S/C20H22O3/c1-20(2,3)16-9-5-14(6-10-16)18(21)13-19(22)15-7-11-17(23-4)12-8-15/h5-12H,13H2,1-4H3	XNEFYCZVKIDDMS-UHFFFAOYSA-N	3	0.494714	1.56338	1.61145	30.6999	Mulde	cosmetics
Avobenzone	70356-09-1	pos	2018	R4	365	[M+H]+	InChI=1S/C20H22O3/c1-20(2,3)16-9-5-14(6-10-16)18(21)13-19(22)15-7-11-17(23-4)12-8-15/h5-12H,13H2,1-4H3	XNEFYCZVKIDDMS-UHFFFAOYSA-N	3	0.0995792	3.46752	3.46847	2.87099	Rhine	cosmetics
Avobenzone	70356-09-1	pos	2018	R3	365	[M+H]+	InChI=1S/C20H22O3/c1-20(2,3)16-9-5-14(6-10-16)18(21)13-19(22)15-7-11-17(23-4)12-8-15/h5-12H,13H2,1-4H3	XNEFYCZVKIDDMS-UHFFFAOYSA-N	3	0.365213	2.75377	2.76926	13.1881	Rhine	cosmetics
Avobenzone	70356-09-1	pos	2018	R1	365	[M+H]+	InChI=1S/C20H22O3/c1-20(2,3)16-9-5-14(6-10-16)18(21)13-19(22)15-7-11-17(23-4)12-8-15/h5-12H,13H2,1-4H3	XNEFYCZVKIDDMS-UHFFFAOYSA-N	3	0.974252	2.87346	2.98471	32.6415	Rhine	cosmetics
Avobenzone	70356-09-1	pos	2018	Sa	365	[M+H]+	InChI=1S/C20H22O3/c1-20(2,3)16-9-5-14(6-10-16)18(21)13-19(22)15-7-11-17(23-4)12-8-15/h5-12H,13H2,1-4H3	XNEFYCZVKIDDMS-UHFFFAOYSA-N	3	0.530397	3.43438	3.46061	15.3267	Saale	cosmetics
Avobenzone	70356-09-1	pos	2018	S1	365	[M+H]+	InChI=1S/C20H22O3/c1-20(2,3)16-9-5-14(6-10-16)18(21)13-19(22)15-7-11-17(23-4)12-8-15/h5-12H,13H2,1-4H3	XNEFYCZVKIDDMS-UHFFFAOYSA-N	3	0.224938	4.17252	4.17664	5.38562	Saar	cosmetics
Avobenzone	70356-09-1	pos	2018	S2	365	[M+H]+	InChI=1S/C20H22O3/c1-20(2,3)16-9-5-14(6-10-16)18(21)13-19(22)15-7-11-17(23-4)12-8-15/h5-12H,13H2,1-4H3	XNEFYCZVKIDDMS-UHFFFAOYSA-N	3	1.87589	3.93328	4.22358	44.4146	Saar	cosmetics
Avobenzone	70356-09-1	pos	2019	D3	365	[M+H]+	InChI=1S/C20H22O3/c1-20(2,3)16-9-5-14(6-10-16)18(21)13-19(22)15-7-11-17(23-4)12-8-15/h5-12H,13H2,1-4H3	XNEFYCZVKIDDMS-UHFFFAOYSA-N	3	0.109125	0.485139	0.493246	22.1239	Danube	cosmetics
Avobenzone	70356-09-1	pos	2019	D1	365	[M+H]+	InChI=1S/C20H22O3/c1-20(2,3)16-9-5-14(6-10-16)18(21)13-19(22)15-7-11-17(23-4)12-8-15/h5-12H,13H2,1-4H3	XNEFYCZVKIDDMS-UHFFFAOYSA-N	3	0.163493	1.54097	1.54697	10.5685	Danube	cosmetics
Avobenzone	70356-09-1	pos	2019	E5	365	[M+H]+	InChI=1S/C20H22O3/c1-20(2,3)16-9-5-14(6-10-16)18(21)13-19(22)15-7-11-17(23-4)12-8-15/h5-12H,13H2,1-4H3	XNEFYCZVKIDDMS-UHFFFAOYSA-N	3	0.0359363	0.18214	0.184594	19.4677	Elbe	cosmetics
Avobenzone	70356-09-1	pos	2019	E4	365	[M+H]+	InChI=1S/C20H22O3/c1-20(2,3)16-9-5-14(6-10-16)18(21)13-19(22)15-7-11-17(23-4)12-8-15/h5-12H,13H2,1-4H3	XNEFYCZVKIDDMS-UHFFFAOYSA-N	3	0.323979	0.310808	0.386108	83.909	Elbe	cosmetics
Avobenzone	70356-09-1	pos	2019	E1	365	[M+H]+	InChI=1S/C20H22O3/c1-20(2,3)16-9-5-14(6-10-16)18(21)13-19(22)15-7-11-17(23-4)12-8-15/h5-12H,13H2,1-4H3	XNEFYCZVKIDDMS-UHFFFAOYSA-N	3	0.425092	3.28203	3.30007	12.8813	Elbe	cosmetics
Avobenzone	70356-09-1	pos	2019	E2	365	[M+H]+	InChI=1S/C20H22O3/c1-20(2,3)16-9-5-14(6-10-16)18(21)13-19(22)15-7-11-17(23-4)12-8-15/h5-12H,13H2,1-4H3	XNEFYCZVKIDDMS-UHFFFAOYSA-N	3	0.0501067	1.49659	1.49715	3.34682	Elbe	cosmetics
Avobenzone	70356-09-1	pos	2019	Mu	365	[M+H]+	InChI=1S/C20H22O3/c1-20(2,3)16-9-5-14(6-10-16)18(21)13-19(22)15-7-11-17(23-4)12-8-15/h5-12H,13H2,1-4H3	XNEFYCZVKIDDMS-UHFFFAOYSA-N	3	0.713536	1.40803	1.51639	47.055	Mulde	cosmetics
Avobenzone	70356-09-1	pos	2019	R4	365	[M+H]+	InChI=1S/C20H22O3/c1-20(2,3)16-9-5-14(6-10-16)18(21)13-19(22)15-7-11-17(23-4)12-8-15/h5-12H,13H2,1-4H3	XNEFYCZVKIDDMS-UHFFFAOYSA-N	3	0.170943	1.53473	1.54103	11.0928	Rhine	cosmetics
Avobenzone	70356-09-1	pos	2019	R3	365	[M+H]+	InChI=1S/C20H22O3/c1-20(2,3)16-9-5-14(6-10-16)18(21)13-19(22)15-7-11-17(23-4)12-8-15/h5-12H,13H2,1-4H3	XNEFYCZVKIDDMS-UHFFFAOYSA-N	3	0.251491	1.18573	1.20475	20.875	Rhine	cosmetics
Avobenzone	70356-09-1	pos	2019	R1	365	[M+H]+	InChI=1S/C20H22O3/c1-20(2,3)16-9-5-14(6-10-16)18(21)13-19(22)15-7-11-17(23-4)12-8-15/h5-12H,13H2,1-4H3	XNEFYCZVKIDDMS-UHFFFAOYSA-N	3	0.134518	2.50139	2.50383	5.3725	Rhine	cosmetics
Avobenzone	70356-09-1	pos	2019	Sa	365	[M+H]+	InChI=1S/C20H22O3/c1-20(2,3)16-9-5-14(6-10-16)18(21)13-19(22)15-7-11-17(23-4)12-8-15/h5-12H,13H2,1-4H3	XNEFYCZVKIDDMS-UHFFFAOYSA-N	3	1.65982	1.1122	1.69468	97.943	Saale	cosmetics
Avobenzone	70356-09-1	pos	2019	S1	365	[M+H]+	InChI=1S/C20H22O3/c1-20(2,3)16-9-5-14(6-10-16)18(21)13-19(22)15-7-11-17(23-4)12-8-15/h5-12H,13H2,1-4H3	XNEFYCZVKIDDMS-UHFFFAOYSA-N	3	1.46837	5.45595	5.59039	26.2659	Saar	cosmetics
Avobenzone	70356-09-1	pos	2019	S2	365	[M+H]+	InChI=1S/C20H22O3/c1-20(2,3)16-9-5-14(6-10-16)18(21)13-19(22)15-7-11-17(23-4)12-8-15/h5-12H,13H2,1-4H3	XNEFYCZVKIDDMS-UHFFFAOYSA-N	3	1.36507	6.05862	6.15238	22.1876	Saar	cosmetics
Avobenzone	70356-09-1	pos	2020	D3	365	[M+H]+	InChI=1S/C20H22O3/c1-20(2,3)16-9-5-14(6-10-16)18(21)13-19(22)15-7-11-17(23-4)12-8-15/h5-12H,13H2,1-4H3	XNEFYCZVKIDDMS-UHFFFAOYSA-N	3	0.153075	0.382645	0.403802	37.9085	Danube	cosmetics
Avobenzone	70356-09-1	pos	2020	D1	365	[M+H]+	InChI=1S/C20H22O3/c1-20(2,3)16-9-5-14(6-10-16)18(21)13-19(22)15-7-11-17(23-4)12-8-15/h5-12H,13H2,1-4H3	XNEFYCZVKIDDMS-UHFFFAOYSA-N	3	0.738037	1.56671	1.70076	43.3944	Danube	cosmetics
Avobenzone	70356-09-1	pos	2020	E5	365	[M+H]+	InChI=1S/C20H22O3/c1-20(2,3)16-9-5-14(6-10-16)18(21)13-19(22)15-7-11-17(23-4)12-8-15/h5-12H,13H2,1-4H3	XNEFYCZVKIDDMS-UHFFFAOYSA-N	3	0.0561984	0.120003	0.12896	43.5782	Elbe	cosmetics
Avobenzone	70356-09-1	pos	2020	E4	365	[M+H]+	InChI=1S/C20H22O3/c1-20(2,3)16-9-5-14(6-10-16)18(21)13-19(22)15-7-11-17(23-4)12-8-15/h5-12H,13H2,1-4H3	XNEFYCZVKIDDMS-UHFFFAOYSA-N	3	0.274394	0.528529	0.567119	48.3839	Elbe	cosmetics
Avobenzone	70356-09-1	pos	2020	E1	365	[M+H]+	InChI=1S/C20H22O3/c1-20(2,3)16-9-5-14(6-10-16)18(21)13-19(22)15-7-11-17(23-4)12-8-15/h5-12H,13H2,1-4H3	XNEFYCZVKIDDMS-UHFFFAOYSA-N	3	0.268352	2.33957	2.34948	11.4218	Elbe	cosmetics
Avobenzone	70356-09-1	pos	2020	E2	365	[M+H]+	InChI=1S/C20H22O3/c1-20(2,3)16-9-5-14(6-10-16)18(21)13-19(22)15-7-11-17(23-4)12-8-15/h5-12H,13H2,1-4H3	XNEFYCZVKIDDMS-UHFFFAOYSA-N	3	0.411405	2.67872	2.69982	15.2382	Elbe	cosmetics
Avobenzone	70356-09-1	pos	2020	Mu	365	[M+H]+	InChI=1S/C20H22O3/c1-20(2,3)16-9-5-14(6-10-16)18(21)13-19(22)15-7-11-17(23-4)12-8-15/h5-12H,13H2,1-4H3	XNEFYCZVKIDDMS-UHFFFAOYSA-N	3	0.0687943	0.726041	0.728135	9.44802	Mulde	cosmetics
Avobenzone	70356-09-1	pos	2020	R4	365	[M+H]+	InChI=1S/C20H22O3/c1-20(2,3)16-9-5-14(6-10-16)18(21)13-19(22)15-7-11-17(23-4)12-8-15/h5-12H,13H2,1-4H3	XNEFYCZVKIDDMS-UHFFFAOYSA-N	3	0.577594	1.45351	1.52096	37.9757	Rhine	cosmetics
Avobenzone	70356-09-1	pos	2020	R3	365	[M+H]+	InChI=1S/C20H22O3/c1-20(2,3)16-9-5-14(6-10-16)18(21)13-19(22)15-7-11-17(23-4)12-8-15/h5-12H,13H2,1-4H3	XNEFYCZVKIDDMS-UHFFFAOYSA-N	3	0.472673	1.77055	1.81662	26.0193	Rhine	cosmetics
Avobenzone	70356-09-1	pos	2020	R1	365	[M+H]+	InChI=1S/C20H22O3/c1-20(2,3)16-9-5-14(6-10-16)18(21)13-19(22)15-7-11-17(23-4)12-8-15/h5-12H,13H2,1-4H3	XNEFYCZVKIDDMS-UHFFFAOYSA-N	3	0.199142	2.3431	2.34878	8.47853	Rhine	cosmetics
Avobenzone	70356-09-1	pos	2020	Sa	365	[M+H]+	InChI=1S/C20H22O3/c1-20(2,3)16-9-5-14(6-10-16)18(21)13-19(22)15-7-11-17(23-4)12-8-15/h5-12H,13H2,1-4H3	XNEFYCZVKIDDMS-UHFFFAOYSA-N	3	0.638461	2.92994	2.97606	21.4532	Saale	cosmetics
Avobenzone	70356-09-1	pos	2020	S1	365	[M+H]+	InChI=1S/C20H22O3/c1-20(2,3)16-9-5-14(6-10-16)18(21)13-19(22)15-7-11-17(23-4)12-8-15/h5-12H,13H2,1-4H3	XNEFYCZVKIDDMS-UHFFFAOYSA-N	3	0.666594	2.77663	2.82969	23.5571	Saar	cosmetics
Avobenzone	70356-09-1	pos	2020	S2	365	[M+H]+	InChI=1S/C20H22O3/c1-20(2,3)16-9-5-14(6-10-16)18(21)13-19(22)15-7-11-17(23-4)12-8-15/h5-12H,13H2,1-4H3	XNEFYCZVKIDDMS-UHFFFAOYSA-N	3	0.24917	3.52381	3.52952	7.0596	Saar	cosmetics
Avobenzone	70356-09-1	pos	2021	D3	365	[M+H]+	InChI=1S/C20H22O3/c1-20(2,3)16-9-5-14(6-10-16)18(21)13-19(22)15-7-11-17(23-4)12-8-15/h5-12H,13H2,1-4H3	XNEFYCZVKIDDMS-UHFFFAOYSA-N	3	0.0597849	0.480434	0.482828	12.3822	Danube	cosmetics
Avobenzone	70356-09-1	pos	2021	D1	365	[M+H]+	InChI=1S/C20H22O3/c1-20(2,3)16-9-5-14(6-10-16)18(21)13-19(22)15-7-11-17(23-4)12-8-15/h5-12H,13H2,1-4H3	XNEFYCZVKIDDMS-UHFFFAOYSA-N	3	0.0727731	1.62401	1.62512	4.47802	Danube	cosmetics
Avobenzone	70356-09-1	pos	2021	E5	365	[M+H]+	InChI=1S/C20H22O3/c1-20(2,3)16-9-5-14(6-10-16)18(21)13-19(22)15-7-11-17(23-4)12-8-15/h5-12H,13H2,1-4H3	XNEFYCZVKIDDMS-UHFFFAOYSA-N	3	0.0216071	0.115917	0.117276	18.4241	Elbe	cosmetics
Avobenzone	70356-09-1	pos	2021	E4	365	[M+H]+	InChI=1S/C20H22O3/c1-20(2,3)16-9-5-14(6-10-16)18(21)13-19(22)15-7-11-17(23-4)12-8-15/h5-12H,13H2,1-4H3	XNEFYCZVKIDDMS-UHFFFAOYSA-N	3	0.0888419	0.454423	0.459794	19.3221	Elbe	cosmetics
Avobenzone	70356-09-1	pos	2021	E1	365	[M+H]+	InChI=1S/C20H22O3/c1-20(2,3)16-9-5-14(6-10-16)18(21)13-19(22)15-7-11-17(23-4)12-8-15/h5-12H,13H2,1-4H3	XNEFYCZVKIDDMS-UHFFFAOYSA-N	3	0.395972	3.10055	3.11793	12.6999	Elbe	cosmetics
Avobenzone	70356-09-1	pos	2021	E2	365	[M+H]+	InChI=1S/C20H22O3/c1-20(2,3)16-9-5-14(6-10-16)18(21)13-19(22)15-7-11-17(23-4)12-8-15/h5-12H,13H2,1-4H3	XNEFYCZVKIDDMS-UHFFFAOYSA-N	3	0.349925	2.04397	2.06286	16.9631	Elbe	cosmetics
Avobenzone	70356-09-1	pos	2021	Mu	365	[M+H]+	InChI=1S/C20H22O3/c1-20(2,3)16-9-5-14(6-10-16)18(21)13-19(22)15-7-11-17(23-4)12-8-15/h5-12H,13H2,1-4H3	XNEFYCZVKIDDMS-UHFFFAOYSA-N	3	0.948584	0.943383	1.16289	81.5714	Mulde	cosmetics
Avobenzone	70356-09-1	pos	2021	R4	365	[M+H]+	InChI=1S/C20H22O3/c1-20(2,3)16-9-5-14(6-10-16)18(21)13-19(22)15-7-11-17(23-4)12-8-15/h5-12H,13H2,1-4H3	XNEFYCZVKIDDMS-UHFFFAOYSA-N	3	0.0767423	1.78717	1.78826	4.29146	Rhine	cosmetics
Avobenzone	70356-09-1	pos	2021	R3	365	[M+H]+	InChI=1S/C20H22O3/c1-20(2,3)16-9-5-14(6-10-16)18(21)13-19(22)15-7-11-17(23-4)12-8-15/h5-12H,13H2,1-4H3	XNEFYCZVKIDDMS-UHFFFAOYSA-N	3	0.347975	1.62654	1.65178	21.0666	Rhine	cosmetics
Avobenzone	70356-09-1	pos	2021	R1	365	[M+H]+	InChI=1S/C20H22O3/c1-20(2,3)16-9-5-14(6-10-16)18(21)13-19(22)15-7-11-17(23-4)12-8-15/h5-12H,13H2,1-4H3	XNEFYCZVKIDDMS-UHFFFAOYSA-N	3	0.203321	1.39291	1.40244	14.4977	Rhine	cosmetics
Avobenzone	70356-09-1	pos	2021	Sa	365	[M+H]+	InChI=1S/C20H22O3/c1-20(2,3)16-9-5-14(6-10-16)18(21)13-19(22)15-7-11-17(23-4)12-8-15/h5-12H,13H2,1-4H3	XNEFYCZVKIDDMS-UHFFFAOYSA-N	3	0.401188	3.28477	3.30164	12.1512	Saale	cosmetics
Avobenzone	70356-09-1	pos	2021	S1	365	[M+H]+	InChI=1S/C20H22O3/c1-20(2,3)16-9-5-14(6-10-16)18(21)13-19(22)15-7-11-17(23-4)12-8-15/h5-12H,13H2,1-4H3	XNEFYCZVKIDDMS-UHFFFAOYSA-N	3	1.20542	3.31713	3.466	34.7785	Saar	cosmetics
Avobenzone	70356-09-1	pos	2021	S2	365	[M+H]+	InChI=1S/C20H22O3/c1-20(2,3)16-9-5-14(6-10-16)18(21)13-19(22)15-7-11-17(23-4)12-8-15/h5-12H,13H2,1-4H3	XNEFYCZVKIDDMS-UHFFFAOYSA-N	3	1.06535	3.99449	4.07998	26.1116	Saar	cosmetics
Avobenzone	70356-09-1	pos	2022	D3	365	[M+H]+	InChI=1S/C20H22O3/c1-20(2,3)16-9-5-14(6-10-16)18(21)13-19(22)15-7-11-17(23-4)12-8-15/h5-12H,13H2,1-4H3	XNEFYCZVKIDDMS-UHFFFAOYSA-N	3	0.0964969	0.292646	0.301962	31.9566	Danube	cosmetics
Avobenzone	70356-09-1	pos	2022	D1	365	[M+H]+	InChI=1S/C20H22O3/c1-20(2,3)16-9-5-14(6-10-16)18(21)13-19(22)15-7-11-17(23-4)12-8-15/h5-12H,13H2,1-4H3	XNEFYCZVKIDDMS-UHFFFAOYSA-N	3	0.109094	1.32399	1.32706	8.22078	Danube	cosmetics
Avobenzone	70356-09-1	pos	2022	E5	365	[M+H]+	InChI=1S/C20H22O3/c1-20(2,3)16-9-5-14(6-10-16)18(21)13-19(22)15-7-11-17(23-4)12-8-15/h5-12H,13H2,1-4H3	XNEFYCZVKIDDMS-UHFFFAOYSA-N	3	0.00919446	0.0624909	0.0629176	14.6135	Elbe	cosmetics
Avobenzone	70356-09-1	pos	2022	E4	365	[M+H]+	InChI=1S/C20H22O3/c1-20(2,3)16-9-5-14(6-10-16)18(21)13-19(22)15-7-11-17(23-4)12-8-15/h5-12H,13H2,1-4H3	XNEFYCZVKIDDMS-UHFFFAOYSA-N	2	0.0598188	0.442626	0.444642	13.4532	Elbe	cosmetics
Avobenzone	70356-09-1	pos	2022	E1	365	[M+H]+	InChI=1S/C20H22O3/c1-20(2,3)16-9-5-14(6-10-16)18(21)13-19(22)15-7-11-17(23-4)12-8-15/h5-12H,13H2,1-4H3	XNEFYCZVKIDDMS-UHFFFAOYSA-N	3	0.0986568	1.48883	1.49096	6.61699	Elbe	cosmetics
Avobenzone	70356-09-1	pos	2022	E2	365	[M+H]+	InChI=1S/C20H22O3/c1-20(2,3)16-9-5-14(6-10-16)18(21)13-19(22)15-7-11-17(23-4)12-8-15/h5-12H,13H2,1-4H3	XNEFYCZVKIDDMS-UHFFFAOYSA-N	3	0.0829518	0.909642	0.912155	9.09404	Elbe	cosmetics
Avobenzone	70356-09-1	pos	2022	Mu	365	[M+H]+	InChI=1S/C20H22O3/c1-20(2,3)16-9-5-14(6-10-16)18(21)13-19(22)15-7-11-17(23-4)12-8-15/h5-12H,13H2,1-4H3	XNEFYCZVKIDDMS-UHFFFAOYSA-N	2	0.041138	0.243889	0.245618	16.7488	Mulde	cosmetics
Avobenzone	70356-09-1	pos	2022	R4	365	[M+H]+	InChI=1S/C20H22O3/c1-20(2,3)16-9-5-14(6-10-16)18(21)13-19(22)15-7-11-17(23-4)12-8-15/h5-12H,13H2,1-4H3	XNEFYCZVKIDDMS-UHFFFAOYSA-N	3	0.116127	0.924141	0.928927	12.5012	Rhine	cosmetics
Avobenzone	70356-09-1	pos	2022	R3	365	[M+H]+	InChI=1S/C20H22O3/c1-20(2,3)16-9-5-14(6-10-16)18(21)13-19(22)15-7-11-17(23-4)12-8-15/h5-12H,13H2,1-4H3	XNEFYCZVKIDDMS-UHFFFAOYSA-N	3	0.386984	1.69572	1.72375	22.4501	Rhine	cosmetics
Avobenzone	70356-09-1	pos	2022	R1	365	[M+H]+	InChI=1S/C20H22O3/c1-20(2,3)16-9-5-14(6-10-16)18(21)13-19(22)15-7-11-17(23-4)12-8-15/h5-12H,13H2,1-4H3	XNEFYCZVKIDDMS-UHFFFAOYSA-N	3	4.05837	3.99027	4.92057	82.4777	Rhine	cosmetics
Avobenzone	70356-09-1	pos	2022	Sa	365	[M+H]+	InChI=1S/C20H22O3/c1-20(2,3)16-9-5-14(6-10-16)18(21)13-19(22)15-7-11-17(23-4)12-8-15/h5-12H,13H2,1-4H3	XNEFYCZVKIDDMS-UHFFFAOYSA-N	3	0.0550233	1.43271	1.43342	3.8386	Saale	cosmetics
Avobenzone	70356-09-1	pos	2022	S1	365	[M+H]+	InChI=1S/C20H22O3/c1-20(2,3)16-9-5-14(6-10-16)18(21)13-19(22)15-7-11-17(23-4)12-8-15/h5-12H,13H2,1-4H3	XNEFYCZVKIDDMS-UHFFFAOYSA-N	3	0.363649	1.78759	1.81412	20.0455	Saar	cosmetics
Avobenzone	70356-09-1	pos	2022	S2	365	[M+H]+	InChI=1S/C20H22O3/c1-20(2,3)16-9-5-14(6-10-16)18(21)13-19(22)15-7-11-17(23-4)12-8-15/h5-12H,13H2,1-4H3	XNEFYCZVKIDDMS-UHFFFAOYSA-N	3	0.614373	2.16882	2.22352	27.6307	Saar	cosmetics
Benzotriazole	95-14-7	neg	2005	E1	365	[M-H]-	InChI=1S/C6H5N3/c1-2-4-6-5(3-1)7-9-8-6/h1-4H,(H,7,8,9)	QRUDEWIWKLJBPS-UHFFFAOYSA-N	3	0.00263366	0.00717345	0.00753854	34.936	Elbe	Industrial
Benzotriazole	95-14-7	neg	2005	E2	365	[M-H]-	InChI=1S/C6H5N3/c1-2-4-6-5(3-1)7-9-8-6/h1-4H,(H,7,8,9)	QRUDEWIWKLJBPS-UHFFFAOYSA-N	2	0.00728544	0.00722517	0.00887366	82.1018	Elbe	Industrial
Benzotriazole	95-14-7	neg	2005	Mu	365	[M-H]-	InChI=1S/C6H5N3/c1-2-4-6-5(3-1)7-9-8-6/h1-4H,(H,7,8,9)	QRUDEWIWKLJBPS-UHFFFAOYSA-N	3	0.0145831	0.0177901	0.0208444	69.9617	Mulde	Industrial
Benzotriazole	95-14-7	neg	2005	R4	365	[M-H]-	InChI=1S/C6H5N3/c1-2-4-6-5(3-1)7-9-8-6/h1-4H,(H,7,8,9)	QRUDEWIWKLJBPS-UHFFFAOYSA-N	3	0.00156087	0.0133003	0.0133595	11.6836	Rhine	Industrial
Benzotriazole	95-14-7	neg	2005	R3	365	[M-H]-	InChI=1S/C6H5N3/c1-2-4-6-5(3-1)7-9-8-6/h1-4H,(H,7,8,9)	QRUDEWIWKLJBPS-UHFFFAOYSA-N	3	0.0137365	0.0478711	0.0490455	28.0075	Rhine	Industrial
Benzotriazole	95-14-7	neg	2005	Sa	365	[M-H]-	InChI=1S/C6H5N3/c1-2-4-6-5(3-1)7-9-8-6/h1-4H,(H,7,8,9)	QRUDEWIWKLJBPS-UHFFFAOYSA-N	3	0.021122	0.0688024	0.0710978	29.7084	Saale	Industrial
Benzotriazole	95-14-7	neg	2006	E1	365	[M-H]-	InChI=1S/C6H5N3/c1-2-4-6-5(3-1)7-9-8-6/h1-4H,(H,7,8,9)	QRUDEWIWKLJBPS-UHFFFAOYSA-N	2	0.00343853	0.00858004	0.0089179	38.5577	Elbe	Industrial
Benzotriazole	95-14-7	neg	2006	E2	365	[M-H]-	InChI=1S/C6H5N3/c1-2-4-6-5(3-1)7-9-8-6/h1-4H,(H,7,8,9)	QRUDEWIWKLJBPS-UHFFFAOYSA-N	3	0.000532694	0.0102862	0.0102955	5.17406	Elbe	Industrial
Benzotriazole	95-14-7	neg	2006	Mu	365	[M-H]-	InChI=1S/C6H5N3/c1-2-4-6-5(3-1)7-9-8-6/h1-4H,(H,7,8,9)	QRUDEWIWKLJBPS-UHFFFAOYSA-N	3	0.010581	0.0117582	0.0143451	73.7605	Mulde	Industrial
Benzotriazole	95-14-7	neg	2006	R4	365	[M-H]-	InChI=1S/C6H5N3/c1-2-4-6-5(3-1)7-9-8-6/h1-4H,(H,7,8,9)	QRUDEWIWKLJBPS-UHFFFAOYSA-N	3	0.00235236	0.0153742	0.0154877	15.1886	Rhine	Industrial
Benzotriazole	95-14-7	neg	2006	R3	365	[M-H]-	InChI=1S/C6H5N3/c1-2-4-6-5(3-1)7-9-8-6/h1-4H,(H,7,8,9)	QRUDEWIWKLJBPS-UHFFFAOYSA-N	3	0.00407725	0.0624018	0.0624916	6.52448	Rhine	Industrial
Benzotriazole	95-14-7	neg	2006	Sa	365	[M-H]-	InChI=1S/C6H5N3/c1-2-4-6-5(3-1)7-9-8-6/h1-4H,(H,7,8,9)	QRUDEWIWKLJBPS-UHFFFAOYSA-N	3	0.0128383	0.0558669	0.056883	22.5697	Saale	Industrial
Benzotriazole	95-14-7	neg	2006	S1	365	[M-H]-	InChI=1S/C6H5N3/c1-2-4-6-5(3-1)7-9-8-6/h1-4H,(H,7,8,9)	QRUDEWIWKLJBPS-UHFFFAOYSA-N	2	0.01897	0.0191039	0.0233429	81.2668	Saar	Industrial
Benzotriazole	95-14-7	neg	2006	S2	365	[M-H]-	InChI=1S/C6H5N3/c1-2-4-6-5(3-1)7-9-8-6/h1-4H,(H,7,8,9)	QRUDEWIWKLJBPS-UHFFFAOYSA-N	3	0.00348114	0.15884	0.158866	2.19125	Saar	Industrial
Benzotriazole	95-14-7	neg	2007	E1	365	[M-H]-	InChI=1S/C6H5N3/c1-2-4-6-5(3-1)7-9-8-6/h1-4H,(H,7,8,9)	QRUDEWIWKLJBPS-UHFFFAOYSA-N	3	0.00214757	0.0203988	0.0204721	10.4902	Elbe	Industrial
Benzotriazole	95-14-7	neg	2007	E2	365	[M-H]-	InChI=1S/C6H5N3/c1-2-4-6-5(3-1)7-9-8-6/h1-4H,(H,7,8,9)	QRUDEWIWKLJBPS-UHFFFAOYSA-N	3	0.00272506	0.0147165	0.0148856	18.3067	Elbe	Industrial
Benzotriazole	95-14-7	neg	2007	Mu	365	[M-H]-	InChI=1S/C6H5N3/c1-2-4-6-5(3-1)7-9-8-6/h1-4H,(H,7,8,9)	QRUDEWIWKLJBPS-UHFFFAOYSA-N	3	0.00114281	0.0106614	0.0107009	10.6796	Mulde	Industrial
Benzotriazole	95-14-7	neg	2007	R4	365	[M-H]-	InChI=1S/C6H5N3/c1-2-4-6-5(3-1)7-9-8-6/h1-4H,(H,7,8,9)	QRUDEWIWKLJBPS-UHFFFAOYSA-N	3	0.00290762	0.0153045	0.015489	18.7722	Rhine	Industrial
Benzotriazole	95-14-7	neg	2007	R3	365	[M-H]-	InChI=1S/C6H5N3/c1-2-4-6-5(3-1)7-9-8-6/h1-4H,(H,7,8,9)	QRUDEWIWKLJBPS-UHFFFAOYSA-N	3	0.00647039	0.0599097	0.0601515	10.7568	Rhine	Industrial
Benzotriazole	95-14-7	neg	2007	Sa	365	[M-H]-	InChI=1S/C6H5N3/c1-2-4-6-5(3-1)7-9-8-6/h1-4H,(H,7,8,9)	QRUDEWIWKLJBPS-UHFFFAOYSA-N	3	0.00827691	0.0408939	0.0414189	19.9834	Saale	Industrial
Benzotriazole	95-14-7	neg	2007	S1	365	[M-H]-	InChI=1S/C6H5N3/c1-2-4-6-5(3-1)7-9-8-6/h1-4H,(H,7,8,9)	QRUDEWIWKLJBPS-UHFFFAOYSA-N	3	0.011408	0.0203171	0.0224854	50.7349	Saar	Industrial
Benzotriazole	95-14-7	neg	2007	S2	365	[M-H]-	InChI=1S/C6H5N3/c1-2-4-6-5(3-1)7-9-8-6/h1-4H,(H,7,8,9)	QRUDEWIWKLJBPS-UHFFFAOYSA-N	3	0.00908994	0.0733255	0.0737132	12.3315	Saar	Industrial
Benzotriazole	95-14-7	neg	2008	E1	365	[M-H]-	InChI=1S/C6H5N3/c1-2-4-6-5(3-1)7-9-8-6/h1-4H,(H,7,8,9)	QRUDEWIWKLJBPS-UHFFFAOYSA-N	3	0.00629539	0.0199148	0.0206407	30.4998	Elbe	Industrial
Benzotriazole	95-14-7	neg	2008	E2	365	[M-H]-	InChI=1S/C6H5N3/c1-2-4-6-5(3-1)7-9-8-6/h1-4H,(H,7,8,9)	QRUDEWIWKLJBPS-UHFFFAOYSA-N	2	0.00235973	0.0183998	0.0184753	12.7723	Elbe	Industrial
Benzotriazole	95-14-7	neg	2008	Mu	365	[M-H]-	InChI=1S/C6H5N3/c1-2-4-6-5(3-1)7-9-8-6/h1-4H,(H,7,8,9)	QRUDEWIWKLJBPS-UHFFFAOYSA-N	3	0.00691029	0.00918567	0.0104844	65.9101	Mulde	Industrial
Benzotriazole	95-14-7	neg	2008	R4	365	[M-H]-	InChI=1S/C6H5N3/c1-2-4-6-5(3-1)7-9-8-6/h1-4H,(H,7,8,9)	QRUDEWIWKLJBPS-UHFFFAOYSA-N	3	0.00289803	0.0102158	0.0104605	27.7044	Rhine	Industrial
Benzotriazole	95-14-7	neg	2008	R3	365	[M-H]-	InChI=1S/C6H5N3/c1-2-4-6-5(3-1)7-9-8-6/h1-4H,(H,7,8,9)	QRUDEWIWKLJBPS-UHFFFAOYSA-N	3	0.00387172	0.0671256	0.0671991	5.76155	Rhine	Industrial
Benzotriazole	95-14-7	neg	2008	S1	365	[M-H]-	InChI=1S/C6H5N3/c1-2-4-6-5(3-1)7-9-8-6/h1-4H,(H,7,8,9)	QRUDEWIWKLJBPS-UHFFFAOYSA-N	3	0.0102766	0.0196374	0.021113	48.6742	Saar	Industrial
Benzotriazole	95-14-7	neg	2008	S2	365	[M-H]-	InChI=1S/C6H5N3/c1-2-4-6-5(3-1)7-9-8-6/h1-4H,(H,7,8,9)	QRUDEWIWKLJBPS-UHFFFAOYSA-N	3	0.0351266	0.0393765	0.0483558	72.642	Saar	Industrial
Benzotriazole	95-14-7	neg	2009	E1	365	[M-H]-	InChI=1S/C6H5N3/c1-2-4-6-5(3-1)7-9-8-6/h1-4H,(H,7,8,9)	QRUDEWIWKLJBPS-UHFFFAOYSA-N	3	0.00951981	0.0173839	0.0191818	49.6293	Elbe	Industrial
Benzotriazole	95-14-7	neg	2009	E2	365	[M-H]-	InChI=1S/C6H5N3/c1-2-4-6-5(3-1)7-9-8-6/h1-4H,(H,7,8,9)	QRUDEWIWKLJBPS-UHFFFAOYSA-N	3	0.00159639	0.0134507	0.0135159	11.8112	Elbe	Industrial
Benzotriazole	95-14-7	neg	2009	Mu	365	[M-H]-	InChI=1S/C6H5N3/c1-2-4-6-5(3-1)7-9-8-6/h1-4H,(H,7,8,9)	QRUDEWIWKLJBPS-UHFFFAOYSA-N	3	0.0101373	0.0182636	0.0204859	49.4841	Mulde	Industrial
Benzotriazole	95-14-7	neg	2009	R4	365	[M-H]-	InChI=1S/C6H5N3/c1-2-4-6-5(3-1)7-9-8-6/h1-4H,(H,7,8,9)	QRUDEWIWKLJBPS-UHFFFAOYSA-N	3	0.000878626	0.0098318	0.00985883	8.91207	Rhine	Industrial
Benzotriazole	95-14-7	neg	2009	R3	365	[M-H]-	InChI=1S/C6H5N3/c1-2-4-6-5(3-1)7-9-8-6/h1-4H,(H,7,8,9)	QRUDEWIWKLJBPS-UHFFFAOYSA-N	3	0.0135439	0.061974	0.0629464	21.5167	Rhine	Industrial
Benzotriazole	95-14-7	neg	2009	Sa	365	[M-H]-	InChI=1S/C6H5N3/c1-2-4-6-5(3-1)7-9-8-6/h1-4H,(H,7,8,9)	QRUDEWIWKLJBPS-UHFFFAOYSA-N	3	0.0235724	0.0378687	0.0427666	55.1186	Saale	Industrial
Benzotriazole	95-14-7	neg	2009	S1	365	[M-H]-	InChI=1S/C6H5N3/c1-2-4-6-5(3-1)7-9-8-6/h1-4H,(H,7,8,9)	QRUDEWIWKLJBPS-UHFFFAOYSA-N	3	0.00718548	0.0139685	0.015124	47.5104	Saar	Industrial
Benzotriazole	95-14-7	neg	2009	S2	365	[M-H]-	InChI=1S/C6H5N3/c1-2-4-6-5(3-1)7-9-8-6/h1-4H,(H,7,8,9)	QRUDEWIWKLJBPS-UHFFFAOYSA-N	3	0.0121687	0.0476843	0.0488152	24.9281	Saar	Industrial
Benzotriazole	95-14-7	neg	2010	E2	365	[M-H]-	InChI=1S/C6H5N3/c1-2-4-6-5(3-1)7-9-8-6/h1-4H,(H,7,8,9)	QRUDEWIWKLJBPS-UHFFFAOYSA-N	3	0.000987175	0.00799713	0.00803924	12.2794	Elbe	Industrial
Benzotriazole	95-14-7	neg	2010	Mu	365	[M-H]-	InChI=1S/C6H5N3/c1-2-4-6-5(3-1)7-9-8-6/h1-4H,(H,7,8,9)	QRUDEWIWKLJBPS-UHFFFAOYSA-N	3	0.0103242	0.0177058	0.0200651	51.4534	Mulde	Industrial
Benzotriazole	95-14-7	neg	2010	R4	365	[M-H]-	InChI=1S/C6H5N3/c1-2-4-6-5(3-1)7-9-8-6/h1-4H,(H,7,8,9)	QRUDEWIWKLJBPS-UHFFFAOYSA-N	3	0.00193995	0.0115537	0.0116691	16.6247	Rhine	Industrial
Benzotriazole	95-14-7	neg	2010	R3	365	[M-H]-	InChI=1S/C6H5N3/c1-2-4-6-5(3-1)7-9-8-6/h1-4H,(H,7,8,9)	QRUDEWIWKLJBPS-UHFFFAOYSA-N	3	0.00820573	0.0593985	0.0597568	13.7319	Rhine	Industrial
Benzotriazole	95-14-7	neg	2010	Sa	365	[M-H]-	InChI=1S/C6H5N3/c1-2-4-6-5(3-1)7-9-8-6/h1-4H,(H,7,8,9)	QRUDEWIWKLJBPS-UHFFFAOYSA-N	3	0.00174446	0.0365114	0.0365397	4.77416	Saale	Industrial
Benzotriazole	95-14-7	neg	2010	S1	365	[M-H]-	InChI=1S/C6H5N3/c1-2-4-6-5(3-1)7-9-8-6/h1-4H,(H,7,8,9)	QRUDEWIWKLJBPS-UHFFFAOYSA-N	3	0.00428614	0.00725355	0.0079372	54.0006	Saar	Industrial
Benzotriazole	95-14-7	neg	2010	S2	365	[M-H]-	InChI=1S/C6H5N3/c1-2-4-6-5(3-1)7-9-8-6/h1-4H,(H,7,8,9)	QRUDEWIWKLJBPS-UHFFFAOYSA-N	3	0.00522901	0.0564041	0.0565647	9.24431	Saar	Industrial
Benzotriazole	95-14-7	neg	2011	E1	365	[M-H]-	InChI=1S/C6H5N3/c1-2-4-6-5(3-1)7-9-8-6/h1-4H,(H,7,8,9)	QRUDEWIWKLJBPS-UHFFFAOYSA-N	2	0.000929181	0.00851609	0.00854139	10.8786	Elbe	Industrial
Benzotriazole	95-14-7	neg	2011	E2	365	[M-H]-	InChI=1S/C6H5N3/c1-2-4-6-5(3-1)7-9-8-6/h1-4H,(H,7,8,9)	QRUDEWIWKLJBPS-UHFFFAOYSA-N	2	0.00135605	0.0047337	0.00482984	28.0765	Elbe	Industrial
Benzotriazole	95-14-7	neg	2011	Mu	365	[M-H]-	InChI=1S/C6H5N3/c1-2-4-6-5(3-1)7-9-8-6/h1-4H,(H,7,8,9)	QRUDEWIWKLJBPS-UHFFFAOYSA-N	3	0.0102105	0.00916781	0.0122105	83.6205	Mulde	Industrial
Benzotriazole	95-14-7	neg	2011	R4	365	[M-H]-	InChI=1S/C6H5N3/c1-2-4-6-5(3-1)7-9-8-6/h1-4H,(H,7,8,9)	QRUDEWIWKLJBPS-UHFFFAOYSA-N	3	0.00149144	0.0112869	0.011351	13.1392	Rhine	Industrial
Benzotriazole	95-14-7	neg	2011	R3	365	[M-H]-	InChI=1S/C6H5N3/c1-2-4-6-5(3-1)7-9-8-6/h1-4H,(H,7,8,9)	QRUDEWIWKLJBPS-UHFFFAOYSA-N	3	0.00415417	0.062177	0.0622688	6.67135	Rhine	Industrial
Benzotriazole	95-14-7	neg	2011	Sa	365	[M-H]-	InChI=1S/C6H5N3/c1-2-4-6-5(3-1)7-9-8-6/h1-4H,(H,7,8,9)	QRUDEWIWKLJBPS-UHFFFAOYSA-N	3	0.00698192	0.047641	0.0479636	14.5567	Saale	Industrial
Benzotriazole	95-14-7	neg	2011	S1	365	[M-H]-	InChI=1S/C6H5N3/c1-2-4-6-5(3-1)7-9-8-6/h1-4H,(H,7,8,9)	QRUDEWIWKLJBPS-UHFFFAOYSA-N	2	0.0112075	0.0207003	0.0221654	50.563	Saar	Industrial
Benzotriazole	95-14-7	neg	2011	S2	365	[M-H]-	InChI=1S/C6H5N3/c1-2-4-6-5(3-1)7-9-8-6/h1-4H,(H,7,8,9)	QRUDEWIWKLJBPS-UHFFFAOYSA-N	3	0.0101923	0.0438104	0.0445415	22.8826	Saar	Industrial
Benzotriazole	95-14-7	neg	2012	E1	365	[M-H]-	InChI=1S/C6H5N3/c1-2-4-6-5(3-1)7-9-8-6/h1-4H,(H,7,8,9)	QRUDEWIWKLJBPS-UHFFFAOYSA-N	3	0.00235722	0.00718002	0.0074284	31.7326	Elbe	Industrial
Benzotriazole	95-14-7	neg	2012	Mu	365	[M-H]-	InChI=1S/C6H5N3/c1-2-4-6-5(3-1)7-9-8-6/h1-4H,(H,7,8,9)	QRUDEWIWKLJBPS-UHFFFAOYSA-N	3	0.00719513	0.0170316	0.018188	39.5597	Mulde	Industrial
Benzotriazole	95-14-7	neg	2012	R4	365	[M-H]-	InChI=1S/C6H5N3/c1-2-4-6-5(3-1)7-9-8-6/h1-4H,(H,7,8,9)	QRUDEWIWKLJBPS-UHFFFAOYSA-N	3	0.0029953	0.0115978	0.0118359	25.307	Rhine	Industrial
Benzotriazole	95-14-7	neg	2012	R3	365	[M-H]-	InChI=1S/C6H5N3/c1-2-4-6-5(3-1)7-9-8-6/h1-4H,(H,7,8,9)	QRUDEWIWKLJBPS-UHFFFAOYSA-N	3	0.00420397	0.053827	0.0539368	7.79424	Rhine	Industrial
Benzotriazole	95-14-7	neg	2012	Sa	365	[M-H]-	InChI=1S/C6H5N3/c1-2-4-6-5(3-1)7-9-8-6/h1-4H,(H,7,8,9)	QRUDEWIWKLJBPS-UHFFFAOYSA-N	3	0.00960733	0.0466293	0.047297	20.3128	Saale	Industrial
Benzotriazole	95-14-7	neg	2012	S1	365	[M-H]-	InChI=1S/C6H5N3/c1-2-4-6-5(3-1)7-9-8-6/h1-4H,(H,7,8,9)	QRUDEWIWKLJBPS-UHFFFAOYSA-N	2	0.00315963	0.0233	0.0234068	13.4987	Saar	Industrial
Benzotriazole	95-14-7	neg	2012	S2	365	[M-H]-	InChI=1S/C6H5N3/c1-2-4-6-5(3-1)7-9-8-6/h1-4H,(H,7,8,9)	QRUDEWIWKLJBPS-UHFFFAOYSA-N	3	0.00386954	0.135257	0.135294	2.86009	Saar	Industrial
Benzotriazole	95-14-7	neg	2013	E1	365	[M-H]-	InChI=1S/C6H5N3/c1-2-4-6-5(3-1)7-9-8-6/h1-4H,(H,7,8,9)	QRUDEWIWKLJBPS-UHFFFAOYSA-N	2	0.000677644	0.0181812	0.0181875	3.72588	Elbe	Industrial
Benzotriazole	95-14-7	neg	2013	E2	365	[M-H]-	InChI=1S/C6H5N3/c1-2-4-6-5(3-1)7-9-8-6/h1-4H,(H,7,8,9)	QRUDEWIWKLJBPS-UHFFFAOYSA-N	3	0.022479	0.0247883	0.0330188	68.0794	Elbe	Industrial
Benzotriazole	95-14-7	neg	2013	Mu	365	[M-H]-	InChI=1S/C6H5N3/c1-2-4-6-5(3-1)7-9-8-6/h1-4H,(H,7,8,9)	QRUDEWIWKLJBPS-UHFFFAOYSA-N	3	0.0516196	0.0469129	0.0681327	75.7634	Mulde	Industrial
Benzotriazole	95-14-7	neg	2013	R4	365	[M-H]-	InChI=1S/C6H5N3/c1-2-4-6-5(3-1)7-9-8-6/h1-4H,(H,7,8,9)	QRUDEWIWKLJBPS-UHFFFAOYSA-N	3	0.00351659	0.00846504	0.00895031	39.2901	Rhine	Industrial
Benzotriazole	95-14-7	neg	2013	R3	365	[M-H]-	InChI=1S/C6H5N3/c1-2-4-6-5(3-1)7-9-8-6/h1-4H,(H,7,8,9)	QRUDEWIWKLJBPS-UHFFFAOYSA-N	3	0.00247828	0.0452383	0.0452844	5.47271	Rhine	Industrial
Benzotriazole	95-14-7	neg	2013	Sa	365	[M-H]-	InChI=1S/C6H5N3/c1-2-4-6-5(3-1)7-9-8-6/h1-4H,(H,7,8,9)	QRUDEWIWKLJBPS-UHFFFAOYSA-N	3	0.0835641	0.0838558	0.117597	71.0598	Saale	Industrial
Benzotriazole	95-14-7	neg	2013	S1	365	[M-H]-	InChI=1S/C6H5N3/c1-2-4-6-5(3-1)7-9-8-6/h1-4H,(H,7,8,9)	QRUDEWIWKLJBPS-UHFFFAOYSA-N	3	0.00773247	0.0127145	0.014163	54.5963	Saar	Industrial
Benzotriazole	95-14-7	neg	2013	S2	365	[M-H]-	InChI=1S/C6H5N3/c1-2-4-6-5(3-1)7-9-8-6/h1-4H,(H,7,8,9)	QRUDEWIWKLJBPS-UHFFFAOYSA-N	3	0.00893513	0.0880849	0.0883939	10.1083	Saar	Industrial
Benzotriazole	95-14-7	neg	2014	E1	365	[M-H]-	InChI=1S/C6H5N3/c1-2-4-6-5(3-1)7-9-8-6/h1-4H,(H,7,8,9)	QRUDEWIWKLJBPS-UHFFFAOYSA-N	3	0.00560402	0.0129349	0.0137705	40.6959	Elbe	Industrial
Benzotriazole	95-14-7	neg	2014	E2	365	[M-H]-	InChI=1S/C6H5N3/c1-2-4-6-5(3-1)7-9-8-6/h1-4H,(H,7,8,9)	QRUDEWIWKLJBPS-UHFFFAOYSA-N	3	0.0114004	0.0259623	0.0278536	40.9298	Elbe	Industrial
Benzotriazole	95-14-7	neg	2014	Mu	365	[M-H]-	InChI=1S/C6H5N3/c1-2-4-6-5(3-1)7-9-8-6/h1-4H,(H,7,8,9)	QRUDEWIWKLJBPS-UHFFFAOYSA-N	3	0.0830945	0.0770412	0.113436	73.2521	Mulde	Industrial
Benzotriazole	95-14-7	neg	2014	R4	365	[M-H]-	InChI=1S/C6H5N3/c1-2-4-6-5(3-1)7-9-8-6/h1-4H,(H,7,8,9)	QRUDEWIWKLJBPS-UHFFFAOYSA-N	3	0.00381714	0.0116546	0.0120276	31.7365	Rhine	Industrial
Benzotriazole	95-14-7	neg	2014	R3	365	[M-H]-	InChI=1S/C6H5N3/c1-2-4-6-5(3-1)7-9-8-6/h1-4H,(H,7,8,9)	QRUDEWIWKLJBPS-UHFFFAOYSA-N	3	0.00191825	0.0311423	0.0311812	6.15194	Rhine	Industrial
Benzotriazole	95-14-7	neg	2014	Sa	365	[M-H]-	InChI=1S/C6H5N3/c1-2-4-6-5(3-1)7-9-8-6/h1-4H,(H,7,8,9)	QRUDEWIWKLJBPS-UHFFFAOYSA-N	3	0.109605	0.128587	0.166743	65.7326	Saale	Industrial
Benzotriazole	95-14-7	neg	2014	S1	365	[M-H]-	InChI=1S/C6H5N3/c1-2-4-6-5(3-1)7-9-8-6/h1-4H,(H,7,8,9)	QRUDEWIWKLJBPS-UHFFFAOYSA-N	3	0.00810069	0.0117052	0.0131456	61.6226	Saar	Industrial
Benzotriazole	95-14-7	neg	2014	S2	365	[M-H]-	InChI=1S/C6H5N3/c1-2-4-6-5(3-1)7-9-8-6/h1-4H,(H,7,8,9)	QRUDEWIWKLJBPS-UHFFFAOYSA-N	3	0.00539251	0.0220002	0.022421	24.0512	Saar	Industrial
Benzotriazole	95-14-7	neg	2015	E1	365	[M-H]-	InChI=1S/C6H5N3/c1-2-4-6-5(3-1)7-9-8-6/h1-4H,(H,7,8,9)	QRUDEWIWKLJBPS-UHFFFAOYSA-N	3	0.00402457	0.0224773	0.0227335	17.7032	Elbe	Industrial
Benzotriazole	95-14-7	neg	2015	E2	365	[M-H]-	InChI=1S/C6H5N3/c1-2-4-6-5(3-1)7-9-8-6/h1-4H,(H,7,8,9)	QRUDEWIWKLJBPS-UHFFFAOYSA-N	3	0.0380275	0.0417953	0.0551223	68.9874	Elbe	Industrial
Benzotriazole	95-14-7	neg	2015	Mu	365	[M-H]-	InChI=1S/C6H5N3/c1-2-4-6-5(3-1)7-9-8-6/h1-4H,(H,7,8,9)	QRUDEWIWKLJBPS-UHFFFAOYSA-N	3	0.108847	0.104429	0.150369	72.3862	Mulde	Industrial
Benzotriazole	95-14-7	neg	2015	R4	365	[M-H]-	InChI=1S/C6H5N3/c1-2-4-6-5(3-1)7-9-8-6/h1-4H,(H,7,8,9)	QRUDEWIWKLJBPS-UHFFFAOYSA-N	3	0.00404445	0.0688838	0.0689644	5.86454	Rhine	Industrial
Benzotriazole	95-14-7	neg	2015	R3	365	[M-H]-	InChI=1S/C6H5N3/c1-2-4-6-5(3-1)7-9-8-6/h1-4H,(H,7,8,9)	QRUDEWIWKLJBPS-UHFFFAOYSA-N	3	0.000486282	0.0274034	0.0274063	1.77434	Rhine	Industrial
Benzotriazole	95-14-7	neg	2015	Sa	365	[M-H]-	InChI=1S/C6H5N3/c1-2-4-6-5(3-1)7-9-8-6/h1-4H,(H,7,8,9)	QRUDEWIWKLJBPS-UHFFFAOYSA-N	3	0.101232	0.109994	0.146822	68.9487	Saale	Industrial
Benzotriazole	95-14-7	neg	2015	S1	365	[M-H]-	InChI=1S/C6H5N3/c1-2-4-6-5(3-1)7-9-8-6/h1-4H,(H,7,8,9)	QRUDEWIWKLJBPS-UHFFFAOYSA-N	3	0.00872654	0.021073	0.0221617	39.3767	Saar	Industrial
Benzotriazole	95-14-7	neg	2015	S2	365	[M-H]-	InChI=1S/C6H5N3/c1-2-4-6-5(3-1)7-9-8-6/h1-4H,(H,7,8,9)	QRUDEWIWKLJBPS-UHFFFAOYSA-N	3	0.00144471	0.0164021	0.0164455	8.7848	Saar	Industrial
Benzotriazole	95-14-7	neg	2016	E1	365	[M-H]-	InChI=1S/C6H5N3/c1-2-4-6-5(3-1)7-9-8-6/h1-4H,(H,7,8,9)	QRUDEWIWKLJBPS-UHFFFAOYSA-N	3	0.0079886	0.0304691	0.0310982	25.6883	Elbe	Industrial
Benzotriazole	95-14-7	neg	2016	E2	365	[M-H]-	InChI=1S/C6H5N3/c1-2-4-6-5(3-1)7-9-8-6/h1-4H,(H,7,8,9)	QRUDEWIWKLJBPS-UHFFFAOYSA-N	3	0.0296763	0.0347187	0.0449615	66.0038	Elbe	Industrial
Benzotriazole	95-14-7	neg	2016	Mu	365	[M-H]-	InChI=1S/C6H5N3/c1-2-4-6-5(3-1)7-9-8-6/h1-4H,(H,7,8,9)	QRUDEWIWKLJBPS-UHFFFAOYSA-N	3	0.10801	0.0977598	0.144605	74.6928	Mulde	Industrial
Benzotriazole	95-14-7	neg	2016	R4	365	[M-H]-	InChI=1S/C6H5N3/c1-2-4-6-5(3-1)7-9-8-6/h1-4H,(H,7,8,9)	QRUDEWIWKLJBPS-UHFFFAOYSA-N	3	0.0221753	0.0920965	0.0939816	23.5953	Rhine	Industrial
Benzotriazole	95-14-7	neg	2016	R3	365	[M-H]-	InChI=1S/C6H5N3/c1-2-4-6-5(3-1)7-9-8-6/h1-4H,(H,7,8,9)	QRUDEWIWKLJBPS-UHFFFAOYSA-N	3	0.012294	0.0787608	0.0794195	15.4799	Rhine	Industrial
Benzotriazole	95-14-7	neg	2016	Sa	365	[M-H]-	InChI=1S/C6H5N3/c1-2-4-6-5(3-1)7-9-8-6/h1-4H,(H,7,8,9)	QRUDEWIWKLJBPS-UHFFFAOYSA-N	3	0.0792498	0.217318	0.228139	34.7375	Saale	Industrial
Benzotriazole	95-14-7	neg	2016	S1	365	[M-H]-	InChI=1S/C6H5N3/c1-2-4-6-5(3-1)7-9-8-6/h1-4H,(H,7,8,9)	QRUDEWIWKLJBPS-UHFFFAOYSA-N	3	0.00463495	0.0960109	0.0960844	4.82383	Saar	Industrial
Benzotriazole	95-14-7	neg	2016	S2	365	[M-H]-	InChI=1S/C6H5N3/c1-2-4-6-5(3-1)7-9-8-6/h1-4H,(H,7,8,9)	QRUDEWIWKLJBPS-UHFFFAOYSA-N	3	0.0137929	0.150707	0.151122	9.127	Saar	Industrial
Benzotriazole	95-14-7	neg	2017	E1	365	[M-H]-	InChI=1S/C6H5N3/c1-2-4-6-5(3-1)7-9-8-6/h1-4H,(H,7,8,9)	QRUDEWIWKLJBPS-UHFFFAOYSA-N	3	0.00481274	0.0305946	0.0308606	15.5951	Elbe	Industrial
Benzotriazole	95-14-7	neg	2017	E2	365	[M-H]-	InChI=1S/C6H5N3/c1-2-4-6-5(3-1)7-9-8-6/h1-4H,(H,7,8,9)	QRUDEWIWKLJBPS-UHFFFAOYSA-N	3	0.0297783	0.0258635	0.039709	74.9912	Elbe	Industrial
Benzotriazole	95-14-7	neg	2017	Mu	365	[M-H]-	InChI=1S/C6H5N3/c1-2-4-6-5(3-1)7-9-8-6/h1-4H,(H,7,8,9)	QRUDEWIWKLJBPS-UHFFFAOYSA-N	3	0.0902804	0.0784439	0.120454	74.9503	Mulde	Industrial
Benzotriazole	95-14-7	neg	2017	R4	365	[M-H]-	InChI=1S/C6H5N3/c1-2-4-6-5(3-1)7-9-8-6/h1-4H,(H,7,8,9)	QRUDEWIWKLJBPS-UHFFFAOYSA-N	3	0.0115537	0.104486	0.104906	11.0134	Rhine	Industrial
Benzotriazole	95-14-7	neg	2017	R3	365	[M-H]-	InChI=1S/C6H5N3/c1-2-4-6-5(3-1)7-9-8-6/h1-4H,(H,7,8,9)	QRUDEWIWKLJBPS-UHFFFAOYSA-N	3	0.0043823	0.100414	0.100477	4.36151	Rhine	Industrial
Benzotriazole	95-14-7	neg	2017	Sa	365	[M-H]-	InChI=1S/C6H5N3/c1-2-4-6-5(3-1)7-9-8-6/h1-4H,(H,7,8,9)	QRUDEWIWKLJBPS-UHFFFAOYSA-N	3	0.118243	0.113978	0.163809	72.1837	Saale	Industrial
Benzotriazole	95-14-7	neg	2017	S1	365	[M-H]-	InChI=1S/C6H5N3/c1-2-4-6-5(3-1)7-9-8-6/h1-4H,(H,7,8,9)	QRUDEWIWKLJBPS-UHFFFAOYSA-N	3	0.00579125	0.127709	0.127795	4.53166	Saar	Industrial
Benzotriazole	95-14-7	neg	2017	S2	365	[M-H]-	InChI=1S/C6H5N3/c1-2-4-6-5(3-1)7-9-8-6/h1-4H,(H,7,8,9)	QRUDEWIWKLJBPS-UHFFFAOYSA-N	3	0.00920446	0.254363	0.254475	3.61703	Saar	Industrial
Benzotriazole	95-14-7	neg	2018	E1	365	[M-H]-	InChI=1S/C6H5N3/c1-2-4-6-5(3-1)7-9-8-6/h1-4H,(H,7,8,9)	QRUDEWIWKLJBPS-UHFFFAOYSA-N	3	0.00606467	0.151413	0.151494	4.00324	Elbe	Industrial
Benzotriazole	95-14-7	neg	2018	E2	365	[M-H]-	InChI=1S/C6H5N3/c1-2-4-6-5(3-1)7-9-8-6/h1-4H,(H,7,8,9)	QRUDEWIWKLJBPS-UHFFFAOYSA-N	3	0.00894039	0.128242	0.128451	6.96013	Elbe	Industrial
Benzotriazole	95-14-7	neg	2018	R4	365	[M-H]-	InChI=1S/C6H5N3/c1-2-4-6-5(3-1)7-9-8-6/h1-4H,(H,7,8,9)	QRUDEWIWKLJBPS-UHFFFAOYSA-N	3	0.00596398	0.100285	0.1004	5.9402	Rhine	Industrial
Benzotriazole	95-14-7	neg	2018	R3	365	[M-H]-	InChI=1S/C6H5N3/c1-2-4-6-5(3-1)7-9-8-6/h1-4H,(H,7,8,9)	QRUDEWIWKLJBPS-UHFFFAOYSA-N	3	0.00916589	0.0941122	0.0943987	9.70977	Rhine	Industrial
Benzotriazole	95-14-7	neg	2018	Sa	365	[M-H]-	InChI=1S/C6H5N3/c1-2-4-6-5(3-1)7-9-8-6/h1-4H,(H,7,8,9)	QRUDEWIWKLJBPS-UHFFFAOYSA-N	3	0.0826721	0.104368	0.130758	63.2254	Saale	Industrial
Benzotriazole	95-14-7	neg	2018	S1	365	[M-H]-	InChI=1S/C6H5N3/c1-2-4-6-5(3-1)7-9-8-6/h1-4H,(H,7,8,9)	QRUDEWIWKLJBPS-UHFFFAOYSA-N	3	0.00123921	0.0967795	0.0967848	1.28038	Saar	Industrial
Benzotriazole	95-14-7	neg	2018	S2	365	[M-H]-	InChI=1S/C6H5N3/c1-2-4-6-5(3-1)7-9-8-6/h1-4H,(H,7,8,9)	QRUDEWIWKLJBPS-UHFFFAOYSA-N	3	0.00546746	0.13962	0.139691	3.91398	Saar	Industrial
Benzotriazole	95-14-7	neg	2019	E1	365	[M-H]-	InChI=1S/C6H5N3/c1-2-4-6-5(3-1)7-9-8-6/h1-4H,(H,7,8,9)	QRUDEWIWKLJBPS-UHFFFAOYSA-N	3	0.0553349	0.0977441	0.110145	50.2384	Elbe	Industrial
Benzotriazole	95-14-7	neg	2019	E2	365	[M-H]-	InChI=1S/C6H5N3/c1-2-4-6-5(3-1)7-9-8-6/h1-4H,(H,7,8,9)	QRUDEWIWKLJBPS-UHFFFAOYSA-N	3	0.0279704	0.0499603	0.055681	50.2333	Elbe	Industrial
Benzotriazole	95-14-7	neg	2019	Mu	365	[M-H]-	InChI=1S/C6H5N3/c1-2-4-6-5(3-1)7-9-8-6/h1-4H,(H,7,8,9)	QRUDEWIWKLJBPS-UHFFFAOYSA-N	3	0.105269	0.123209	0.159394	66.0435	Mulde	Industrial
Benzotriazole	95-14-7	neg	2019	R4	365	[M-H]-	InChI=1S/C6H5N3/c1-2-4-6-5(3-1)7-9-8-6/h1-4H,(H,7,8,9)	QRUDEWIWKLJBPS-UHFFFAOYSA-N	3	0.0744267	0.0877655	0.113061	65.8291	Rhine	Industrial
Benzotriazole	95-14-7	neg	2019	R3	365	[M-H]-	InChI=1S/C6H5N3/c1-2-4-6-5(3-1)7-9-8-6/h1-4H,(H,7,8,9)	QRUDEWIWKLJBPS-UHFFFAOYSA-N	3	0.0395003	0.0472451	0.0605781	65.2056	Rhine	Industrial
Benzotriazole	95-14-7	neg	2019	Sa	365	[M-H]-	InChI=1S/C6H5N3/c1-2-4-6-5(3-1)7-9-8-6/h1-4H,(H,7,8,9)	QRUDEWIWKLJBPS-UHFFFAOYSA-N	3	0.0525148	0.0519207	0.0735098	71.4391	Saale	Industrial
Benzotriazole	95-14-7	neg	2019	S1	365	[M-H]-	InChI=1S/C6H5N3/c1-2-4-6-5(3-1)7-9-8-6/h1-4H,(H,7,8,9)	QRUDEWIWKLJBPS-UHFFFAOYSA-N	3	0.0116457	0.0267628	0.0285421	40.8017	Saar	Industrial
Benzotriazole	95-14-7	neg	2019	S2	365	[M-H]-	InChI=1S/C6H5N3/c1-2-4-6-5(3-1)7-9-8-6/h1-4H,(H,7,8,9)	QRUDEWIWKLJBPS-UHFFFAOYSA-N	3	0.0101978	0.229568	0.229721	4.43921	Saar	Industrial
Benzotriazole	95-14-7	neg	2020	E1	365	[M-H]-	InChI=1S/C6H5N3/c1-2-4-6-5(3-1)7-9-8-6/h1-4H,(H,7,8,9)	QRUDEWIWKLJBPS-UHFFFAOYSA-N	3	0.00446143	0.0297736	0.029984	14.8794	Elbe	Industrial
Benzotriazole	95-14-7	neg	2020	E2	365	[M-H]-	InChI=1S/C6H5N3/c1-2-4-6-5(3-1)7-9-8-6/h1-4H,(H,7,8,9)	QRUDEWIWKLJBPS-UHFFFAOYSA-N	3	0.0194762	0.0383559	0.0412411	47.2252	Elbe	Industrial
Benzotriazole	95-14-7	neg	2020	Mu	365	[M-H]-	InChI=1S/C6H5N3/c1-2-4-6-5(3-1)7-9-8-6/h1-4H,(H,7,8,9)	QRUDEWIWKLJBPS-UHFFFAOYSA-N	3	0.0475218	0.0590552	0.0739439	64.2674	Mulde	Industrial
Benzotriazole	95-14-7	neg	2020	R4	365	[M-H]-	InChI=1S/C6H5N3/c1-2-4-6-5(3-1)7-9-8-6/h1-4H,(H,7,8,9)	QRUDEWIWKLJBPS-UHFFFAOYSA-N	3	0.00739083	0.0199127	0.0207321	35.6493	Rhine	Industrial
Benzotriazole	95-14-7	neg	2020	R3	365	[M-H]-	InChI=1S/C6H5N3/c1-2-4-6-5(3-1)7-9-8-6/h1-4H,(H,7,8,9)	QRUDEWIWKLJBPS-UHFFFAOYSA-N	3	0.0144713	0.0280545	0.0307323	47.0883	Rhine	Industrial
Benzotriazole	95-14-7	neg	2020	Sa	365	[M-H]-	InChI=1S/C6H5N3/c1-2-4-6-5(3-1)7-9-8-6/h1-4H,(H,7,8,9)	QRUDEWIWKLJBPS-UHFFFAOYSA-N	3	0.0417374	0.107789	0.113132	36.8926	Saale	Industrial
Benzotriazole	95-14-7	neg	2020	S1	365	[M-H]-	InChI=1S/C6H5N3/c1-2-4-6-5(3-1)7-9-8-6/h1-4H,(H,7,8,9)	QRUDEWIWKLJBPS-UHFFFAOYSA-N	2	0.00541513	0.0253362	0.0256239	21.1331	Saar	Industrial
Benzotriazole	95-14-7	neg	2020	S2	365	[M-H]-	InChI=1S/C6H5N3/c1-2-4-6-5(3-1)7-9-8-6/h1-4H,(H,7,8,9)	QRUDEWIWKLJBPS-UHFFFAOYSA-N	3	0.017965	0.156088	0.156751	11.4608	Saar	Industrial
Benzotriazole	95-14-7	neg	2021	E1	365	[M-H]-	InChI=1S/C6H5N3/c1-2-4-6-5(3-1)7-9-8-6/h1-4H,(H,7,8,9)	QRUDEWIWKLJBPS-UHFFFAOYSA-N	3	0.00923755	0.0214035	0.0225317	40.9979	Elbe	Industrial
Benzotriazole	95-14-7	neg	2021	Mu	365	[M-H]-	InChI=1S/C6H5N3/c1-2-4-6-5(3-1)7-9-8-6/h1-4H,(H,7,8,9)	QRUDEWIWKLJBPS-UHFFFAOYSA-N	2	0.00348842	0.00484688	0.00543845	64.1436	Mulde	Industrial
Benzotriazole	95-14-7	neg	2021	Sa	365	[M-H]-	InChI=1S/C6H5N3/c1-2-4-6-5(3-1)7-9-8-6/h1-4H,(H,7,8,9)	QRUDEWIWKLJBPS-UHFFFAOYSA-N	3	0.00334155	0.0111829	0.0115451	28.9435	Saale	Industrial
Benzotriazole	95-14-7	neg	2021	S1	365	[M-H]-	InChI=1S/C6H5N3/c1-2-4-6-5(3-1)7-9-8-6/h1-4H,(H,7,8,9)	QRUDEWIWKLJBPS-UHFFFAOYSA-N	3	0.00336998	0.00887684	0.0093216	36.1524	Saar	Industrial
Benzotriazole	95-14-7	neg	2021	S2	365	[M-H]-	InChI=1S/C6H5N3/c1-2-4-6-5(3-1)7-9-8-6/h1-4H,(H,7,8,9)	QRUDEWIWKLJBPS-UHFFFAOYSA-N	2	0.00263822	0.00636535	0.00663308	39.7736	Saar	Industrial
Benzotriazole	95-14-7	neg	2022	E1	365	[M-H]-	InChI=1S/C6H5N3/c1-2-4-6-5(3-1)7-9-8-6/h1-4H,(H,7,8,9)	QRUDEWIWKLJBPS-UHFFFAOYSA-N	3	0.0174476	0.0923096	0.0934748	18.6655	Elbe	Industrial
Benzotriazole	95-14-7	neg	2022	E2	365	[M-H]-	InChI=1S/C6H5N3/c1-2-4-6-5(3-1)7-9-8-6/h1-4H,(H,7,8,9)	QRUDEWIWKLJBPS-UHFFFAOYSA-N	2	0.00747627	0.0315406	0.0319806	23.3775	Elbe	Industrial
Benzotriazole	95-14-7	neg	2022	Mu	365	[M-H]-	InChI=1S/C6H5N3/c1-2-4-6-5(3-1)7-9-8-6/h1-4H,(H,7,8,9)	QRUDEWIWKLJBPS-UHFFFAOYSA-N	3	0.00626923	0.0279832	0.0284122	22.0653	Mulde	Industrial
Benzotriazole	95-14-7	neg	2022	R4	365	[M-H]-	InChI=1S/C6H5N3/c1-2-4-6-5(3-1)7-9-8-6/h1-4H,(H,7,8,9)	QRUDEWIWKLJBPS-UHFFFAOYSA-N	3	0.00781881	0.0355854	0.0361457	21.6314	Rhine	Industrial
Benzotriazole	95-14-7	neg	2022	R3	365	[M-H]-	InChI=1S/C6H5N3/c1-2-4-6-5(3-1)7-9-8-6/h1-4H,(H,7,8,9)	QRUDEWIWKLJBPS-UHFFFAOYSA-N	3	0.00933742	0.0351224	0.0358674	26.0332	Rhine	Industrial
Benzotriazole	95-14-7	neg	2022	Sa	365	[M-H]-	InChI=1S/C6H5N3/c1-2-4-6-5(3-1)7-9-8-6/h1-4H,(H,7,8,9)	QRUDEWIWKLJBPS-UHFFFAOYSA-N	3	0.00371933	0.122947	0.122985	3.02422	Saale	Industrial
Benzotriazole	95-14-7	neg	2022	S1	365	[M-H]-	InChI=1S/C6H5N3/c1-2-4-6-5(3-1)7-9-8-6/h1-4H,(H,7,8,9)	QRUDEWIWKLJBPS-UHFFFAOYSA-N	3	0.00671672	0.0233537	0.0240448	27.9342	Saar	Industrial
Benzotriazole	95-14-7	neg	2022	S2	365	[M-H]-	InChI=1S/C6H5N3/c1-2-4-6-5(3-1)7-9-8-6/h1-4H,(H,7,8,9)	QRUDEWIWKLJBPS-UHFFFAOYSA-N	3	0.0205792	0.0356428	0.0397165	51.8153	Saar	Industrial
Benzotriazole	95-14-7	pos	2005	E5	365	[M+H]+	InChI=1S/C6H5N3/c1-2-4-6-5(3-1)7-9-8-6/h1-4H,(H,7,8,9)	QRUDEWIWKLJBPS-UHFFFAOYSA-N	3	0.0234337	0.0281233	0.0328455	71.3451	Elbe	Industrial
Benzotriazole	95-14-7	pos	2005	E1	365	[M+H]+	InChI=1S/C6H5N3/c1-2-4-6-5(3-1)7-9-8-6/h1-4H,(H,7,8,9)	QRUDEWIWKLJBPS-UHFFFAOYSA-N	3	0.00825945	0.0510512	0.0514877	16.0416	Elbe	Industrial
Benzotriazole	95-14-7	pos	2005	E2	365	[M+H]+	InChI=1S/C6H5N3/c1-2-4-6-5(3-1)7-9-8-6/h1-4H,(H,7,8,9)	QRUDEWIWKLJBPS-UHFFFAOYSA-N	3	0.0150838	0.0428015	0.0444396	33.9423	Elbe	Industrial
Benzotriazole	95-14-7	pos	2005	R4	365	[M+H]+	InChI=1S/C6H5N3/c1-2-4-6-5(3-1)7-9-8-6/h1-4H,(H,7,8,9)	QRUDEWIWKLJBPS-UHFFFAOYSA-N	3	0.0106895	0.0622018	0.0627904	17.0241	Rhine	Industrial
Benzotriazole	95-14-7	pos	2005	R1	365	[M+H]+	InChI=1S/C6H5N3/c1-2-4-6-5(3-1)7-9-8-6/h1-4H,(H,7,8,9)	QRUDEWIWKLJBPS-UHFFFAOYSA-N	3	0.00893576	0.141931	0.142122	6.28738	Rhine	Industrial
Benzotriazole	95-14-7	pos	2005	Sa	365	[M+H]+	InChI=1S/C6H5N3/c1-2-4-6-5(3-1)7-9-8-6/h1-4H,(H,7,8,9)	QRUDEWIWKLJBPS-UHFFFAOYSA-N	3	0.0883004	0.256376	0.266845	33.0906	Saale	Industrial
Benzotriazole	95-14-7	pos	2006	E5	365	[M+H]+	InChI=1S/C6H5N3/c1-2-4-6-5(3-1)7-9-8-6/h1-4H,(H,7,8,9)	QRUDEWIWKLJBPS-UHFFFAOYSA-N	3	0.011198	0.189544	0.189761	5.90112	Elbe	Industrial
Benzotriazole	95-14-7	pos	2006	E1	365	[M+H]+	InChI=1S/C6H5N3/c1-2-4-6-5(3-1)7-9-8-6/h1-4H,(H,7,8,9)	QRUDEWIWKLJBPS-UHFFFAOYSA-N	3	0.0105041	0.0429204	0.0438501	23.9545	Elbe	Industrial
Benzotriazole	95-14-7	pos	2006	E2	365	[M+H]+	InChI=1S/C6H5N3/c1-2-4-6-5(3-1)7-9-8-6/h1-4H,(H,7,8,9)	QRUDEWIWKLJBPS-UHFFFAOYSA-N	3	0.00140465	0.0356371	0.0356553	3.93952	Elbe	Industrial
Benzotriazole	95-14-7	pos	2006	R4	365	[M+H]+	InChI=1S/C6H5N3/c1-2-4-6-5(3-1)7-9-8-6/h1-4H,(H,7,8,9)	QRUDEWIWKLJBPS-UHFFFAOYSA-N	3	0.00856489	0.0830548	0.0833492	10.2759	Rhine	Industrial
Benzotriazole	95-14-7	pos	2006	R1	365	[M+H]+	InChI=1S/C6H5N3/c1-2-4-6-5(3-1)7-9-8-6/h1-4H,(H,7,8,9)	QRUDEWIWKLJBPS-UHFFFAOYSA-N	3	0.0167823	0.0953097	0.0962285	17.44	Rhine	Industrial
Benzotriazole	95-14-7	pos	2006	Sa	365	[M+H]+	InChI=1S/C6H5N3/c1-2-4-6-5(3-1)7-9-8-6/h1-4H,(H,7,8,9)	QRUDEWIWKLJBPS-UHFFFAOYSA-N	3	0.0504192	0.189649	0.194456	25.9284	Saale	Industrial
Benzotriazole	95-14-7	pos	2006	S1	365	[M+H]+	InChI=1S/C6H5N3/c1-2-4-6-5(3-1)7-9-8-6/h1-4H,(H,7,8,9)	QRUDEWIWKLJBPS-UHFFFAOYSA-N	3	0.0264857	0.0983453	0.100628	26.3204	Saar	Industrial
Benzotriazole	95-14-7	pos	2006	S2	365	[M+H]+	InChI=1S/C6H5N3/c1-2-4-6-5(3-1)7-9-8-6/h1-4H,(H,7,8,9)	QRUDEWIWKLJBPS-UHFFFAOYSA-N	3	0.0313733	1.1723	1.17258	2.67557	Saar	Industrial
Benzotriazole	95-14-7	pos	2007	E5	365	[M+H]+	InChI=1S/C6H5N3/c1-2-4-6-5(3-1)7-9-8-6/h1-4H,(H,7,8,9)	QRUDEWIWKLJBPS-UHFFFAOYSA-N	3	0.00831747	0.169121	0.16926	4.91403	Elbe	Industrial
Benzotriazole	95-14-7	pos	2007	E1	365	[M+H]+	InChI=1S/C6H5N3/c1-2-4-6-5(3-1)7-9-8-6/h1-4H,(H,7,8,9)	QRUDEWIWKLJBPS-UHFFFAOYSA-N	3	0.037237	0.105139	0.109946	33.8685	Elbe	Industrial
Benzotriazole	95-14-7	pos	2007	E2	365	[M+H]+	InChI=1S/C6H5N3/c1-2-4-6-5(3-1)7-9-8-6/h1-4H,(H,7,8,9)	QRUDEWIWKLJBPS-UHFFFAOYSA-N	3	0.0171377	0.0703608	0.071861	23.8484	Elbe	Industrial
Benzotriazole	95-14-7	pos	2007	R4	365	[M+H]+	InChI=1S/C6H5N3/c1-2-4-6-5(3-1)7-9-8-6/h1-4H,(H,7,8,9)	QRUDEWIWKLJBPS-UHFFFAOYSA-N	3	0.00624996	0.0790485	0.0792083	7.89054	Rhine	Industrial
Benzotriazole	95-14-7	pos	2007	R1	365	[M+H]+	InChI=1S/C6H5N3/c1-2-4-6-5(3-1)7-9-8-6/h1-4H,(H,7,8,9)	QRUDEWIWKLJBPS-UHFFFAOYSA-N	3	0.00141475	0.11602	0.116025	1.21935	Rhine	Industrial
Benzotriazole	95-14-7	pos	2007	Sa	365	[M+H]+	InChI=1S/C6H5N3/c1-2-4-6-5(3-1)7-9-8-6/h1-4H,(H,7,8,9)	QRUDEWIWKLJBPS-UHFFFAOYSA-N	3	0.0701882	0.16155	0.170202	41.2381	Saale	Industrial
Benzotriazole	95-14-7	pos	2007	S1	365	[M+H]+	InChI=1S/C6H5N3/c1-2-4-6-5(3-1)7-9-8-6/h1-4H,(H,7,8,9)	QRUDEWIWKLJBPS-UHFFFAOYSA-N	3	0.0330314	0.0777999	0.0829215	39.8346	Saar	Industrial
Benzotriazole	95-14-7	pos	2007	S2	365	[M+H]+	InChI=1S/C6H5N3/c1-2-4-6-5(3-1)7-9-8-6/h1-4H,(H,7,8,9)	QRUDEWIWKLJBPS-UHFFFAOYSA-N	3	0.0262073	0.532339	0.532768	4.91908	Saar	Industrial
Benzotriazole	95-14-7	pos	2008	E5	365	[M+H]+	InChI=1S/C6H5N3/c1-2-4-6-5(3-1)7-9-8-6/h1-4H,(H,7,8,9)	QRUDEWIWKLJBPS-UHFFFAOYSA-N	3	0.0202678	0.193038	0.193759	10.4603	Elbe	Industrial
Benzotriazole	95-14-7	pos	2008	E1	365	[M+H]+	InChI=1S/C6H5N3/c1-2-4-6-5(3-1)7-9-8-6/h1-4H,(H,7,8,9)	QRUDEWIWKLJBPS-UHFFFAOYSA-N	3	0.017677	0.0658225	0.0675531	26.1675	Elbe	Industrial
Benzotriazole	95-14-7	pos	2008	E2	365	[M+H]+	InChI=1S/C6H5N3/c1-2-4-6-5(3-1)7-9-8-6/h1-4H,(H,7,8,9)	QRUDEWIWKLJBPS-UHFFFAOYSA-N	3	0.0153346	0.0775155	0.0785803	19.5146	Elbe	Industrial
Benzotriazole	95-14-7	pos	2008	R4	365	[M+H]+	InChI=1S/C6H5N3/c1-2-4-6-5(3-1)7-9-8-6/h1-4H,(H,7,8,9)	QRUDEWIWKLJBPS-UHFFFAOYSA-N	3	0.0183925	0.0539987	0.0558651	32.9231	Rhine	Industrial
Benzotriazole	95-14-7	pos	2008	R1	365	[M+H]+	InChI=1S/C6H5N3/c1-2-4-6-5(3-1)7-9-8-6/h1-4H,(H,7,8,9)	QRUDEWIWKLJBPS-UHFFFAOYSA-N	3	0.00811209	0.12179	0.121974	6.65067	Rhine	Industrial
Benzotriazole	95-14-7	pos	2008	Sa	365	[M+H]+	InChI=1S/C6H5N3/c1-2-4-6-5(3-1)7-9-8-6/h1-4H,(H,7,8,9)	QRUDEWIWKLJBPS-UHFFFAOYSA-N	3	0.0731091	0.132308	0.143203	51.0527	Saale	Industrial
Benzotriazole	95-14-7	pos	2008	S1	365	[M+H]+	InChI=1S/C6H5N3/c1-2-4-6-5(3-1)7-9-8-6/h1-4H,(H,7,8,9)	QRUDEWIWKLJBPS-UHFFFAOYSA-N	3	0.0658973	0.0870014	0.0994078	66.2899	Saar	Industrial
Benzotriazole	95-14-7	pos	2008	S2	365	[M+H]+	InChI=1S/C6H5N3/c1-2-4-6-5(3-1)7-9-8-6/h1-4H,(H,7,8,9)	QRUDEWIWKLJBPS-UHFFFAOYSA-N	3	0.223545	0.239068	0.305724	73.1199	Saar	Industrial
Benzotriazole	95-14-7	pos	2009	D1	365	[M+H]+	InChI=1S/C6H5N3/c1-2-4-6-5(3-1)7-9-8-6/h1-4H,(H,7,8,9)	QRUDEWIWKLJBPS-UHFFFAOYSA-N	3	0.0361211	0.0251872	0.036622	98.6322	Danube	Industrial
Benzotriazole	95-14-7	pos	2009	E5	365	[M+H]+	InChI=1S/C6H5N3/c1-2-4-6-5(3-1)7-9-8-6/h1-4H,(H,7,8,9)	QRUDEWIWKLJBPS-UHFFFAOYSA-N	3	0.0112269	0.199441	0.199648	5.62337	Elbe	Industrial
Benzotriazole	95-14-7	pos	2009	E1	365	[M+H]+	InChI=1S/C6H5N3/c1-2-4-6-5(3-1)7-9-8-6/h1-4H,(H,7,8,9)	QRUDEWIWKLJBPS-UHFFFAOYSA-N	3	0.0216119	0.0734381	0.0757503	28.5304	Elbe	Industrial
Benzotriazole	95-14-7	pos	2009	E2	365	[M+H]+	InChI=1S/C6H5N3/c1-2-4-6-5(3-1)7-9-8-6/h1-4H,(H,7,8,9)	QRUDEWIWKLJBPS-UHFFFAOYSA-N	3	0.0187541	0.0695519	0.0710969	26.3783	Elbe	Industrial
Benzotriazole	95-14-7	pos	2009	R4	365	[M+H]+	InChI=1S/C6H5N3/c1-2-4-6-5(3-1)7-9-8-6/h1-4H,(H,7,8,9)	QRUDEWIWKLJBPS-UHFFFAOYSA-N	3	0.00792677	0.0479835	0.0484466	16.3619	Rhine	Industrial
Benzotriazole	95-14-7	pos	2009	R1	365	[M+H]+	InChI=1S/C6H5N3/c1-2-4-6-5(3-1)7-9-8-6/h1-4H,(H,7,8,9)	QRUDEWIWKLJBPS-UHFFFAOYSA-N	3	0.0147187	0.13572	0.136256	10.8022	Rhine	Industrial
Benzotriazole	95-14-7	pos	2009	Sa	365	[M+H]+	InChI=1S/C6H5N3/c1-2-4-6-5(3-1)7-9-8-6/h1-4H,(H,7,8,9)	QRUDEWIWKLJBPS-UHFFFAOYSA-N	3	0.0971413	0.173256	0.190145	51.088	Saale	Industrial
Benzotriazole	95-14-7	pos	2009	S1	365	[M+H]+	InChI=1S/C6H5N3/c1-2-4-6-5(3-1)7-9-8-6/h1-4H,(H,7,8,9)	QRUDEWIWKLJBPS-UHFFFAOYSA-N	3	0.0349045	0.0790818	0.0833857	41.859	Saar	Industrial
Benzotriazole	95-14-7	pos	2009	S2	365	[M+H]+	InChI=1S/C6H5N3/c1-2-4-6-5(3-1)7-9-8-6/h1-4H,(H,7,8,9)	QRUDEWIWKLJBPS-UHFFFAOYSA-N	3	0.0610543	0.375238	0.378721	16.1212	Saar	Industrial
Benzotriazole	95-14-7	pos	2010	D1	365	[M+H]+	InChI=1S/C6H5N3/c1-2-4-6-5(3-1)7-9-8-6/h1-4H,(H,7,8,9)	QRUDEWIWKLJBPS-UHFFFAOYSA-N	2	0.00229411	0.0121202	0.0122282	18.7607	Danube	Industrial
Benzotriazole	95-14-7	pos	2010	E5	365	[M+H]+	InChI=1S/C6H5N3/c1-2-4-6-5(3-1)7-9-8-6/h1-4H,(H,7,8,9)	QRUDEWIWKLJBPS-UHFFFAOYSA-N	3	0.00537629	0.149894	0.149958	3.5852	Elbe	Industrial
Benzotriazole	95-14-7	pos	2010	E1	365	[M+H]+	InChI=1S/C6H5N3/c1-2-4-6-5(3-1)7-9-8-6/h1-4H,(H,7,8,9)	QRUDEWIWKLJBPS-UHFFFAOYSA-N	3	0.00973493	0.0371287	0.0380125	25.6098	Elbe	Industrial
Benzotriazole	95-14-7	pos	2010	E2	365	[M+H]+	InChI=1S/C6H5N3/c1-2-4-6-5(3-1)7-9-8-6/h1-4H,(H,7,8,9)	QRUDEWIWKLJBPS-UHFFFAOYSA-N	3	0.00170613	0.0326793	0.0327091	5.21609	Elbe	Industrial
Benzotriazole	95-14-7	pos	2010	R4	365	[M+H]+	InChI=1S/C6H5N3/c1-2-4-6-5(3-1)7-9-8-6/h1-4H,(H,7,8,9)	QRUDEWIWKLJBPS-UHFFFAOYSA-N	3	0.00423562	0.0530961	0.0532097	7.96024	Rhine	Industrial
Benzotriazole	95-14-7	pos	2010	R1	365	[M+H]+	InChI=1S/C6H5N3/c1-2-4-6-5(3-1)7-9-8-6/h1-4H,(H,7,8,9)	QRUDEWIWKLJBPS-UHFFFAOYSA-N	3	0.0091687	0.114705	0.11495	7.97625	Rhine	Industrial
Benzotriazole	95-14-7	pos	2010	Sa	365	[M+H]+	InChI=1S/C6H5N3/c1-2-4-6-5(3-1)7-9-8-6/h1-4H,(H,7,8,9)	QRUDEWIWKLJBPS-UHFFFAOYSA-N	3	0.0305479	0.14285	0.145094	21.0539	Saale	Industrial
Benzotriazole	95-14-7	pos	2010	S1	365	[M+H]+	InChI=1S/C6H5N3/c1-2-4-6-5(3-1)7-9-8-6/h1-4H,(H,7,8,9)	QRUDEWIWKLJBPS-UHFFFAOYSA-N	3	0.0148671	0.0472703	0.0489279	30.3857	Saar	Industrial
Benzotriazole	95-14-7	pos	2010	S2	365	[M+H]+	InChI=1S/C6H5N3/c1-2-4-6-5(3-1)7-9-8-6/h1-4H,(H,7,8,9)	QRUDEWIWKLJBPS-UHFFFAOYSA-N	3	0.0447042	0.400594	0.402186	11.1153	Saar	Industrial
Benzotriazole	95-14-7	pos	2011	D1	365	[M+H]+	InChI=1S/C6H5N3/c1-2-4-6-5(3-1)7-9-8-6/h1-4H,(H,7,8,9)	QRUDEWIWKLJBPS-UHFFFAOYSA-N	3	0.0260829	0.0415371	0.045789	56.9632	Danube	Industrial
Benzotriazole	95-14-7	pos	2011	E5	365	[M+H]+	InChI=1S/C6H5N3/c1-2-4-6-5(3-1)7-9-8-6/h1-4H,(H,7,8,9)	QRUDEWIWKLJBPS-UHFFFAOYSA-N	3	0.00177172	0.118606	0.118615	1.49368	Elbe	Industrial
Benzotriazole	95-14-7	pos	2011	E1	365	[M+H]+	InChI=1S/C6H5N3/c1-2-4-6-5(3-1)7-9-8-6/h1-4H,(H,7,8,9)	QRUDEWIWKLJBPS-UHFFFAOYSA-N	3	0.0345911	0.036659	0.0461498	74.954	Elbe	Industrial
Benzotriazole	95-14-7	pos	2011	E2	365	[M+H]+	InChI=1S/C6H5N3/c1-2-4-6-5(3-1)7-9-8-6/h1-4H,(H,7,8,9)	QRUDEWIWKLJBPS-UHFFFAOYSA-N	3	0.0035278	0.0258829	0.026038	13.5487	Elbe	Industrial
Benzotriazole	95-14-7	pos	2011	R4	365	[M+H]+	InChI=1S/C6H5N3/c1-2-4-6-5(3-1)7-9-8-6/h1-4H,(H,7,8,9)	QRUDEWIWKLJBPS-UHFFFAOYSA-N	3	0.00493755	0.0541248	0.054273	9.09762	Rhine	Industrial
Benzotriazole	95-14-7	pos	2011	R1	365	[M+H]+	InChI=1S/C6H5N3/c1-2-4-6-5(3-1)7-9-8-6/h1-4H,(H,7,8,9)	QRUDEWIWKLJBPS-UHFFFAOYSA-N	3	0.00733884	0.160195	0.160305	4.57804	Rhine	Industrial
Benzotriazole	95-14-7	pos	2011	Sa	365	[M+H]+	InChI=1S/C6H5N3/c1-2-4-6-5(3-1)7-9-8-6/h1-4H,(H,7,8,9)	QRUDEWIWKLJBPS-UHFFFAOYSA-N	3	0.0314937	0.178003	0.179908	17.5055	Saale	Industrial
Benzotriazole	95-14-7	pos	2011	S1	365	[M+H]+	InChI=1S/C6H5N3/c1-2-4-6-5(3-1)7-9-8-6/h1-4H,(H,7,8,9)	QRUDEWIWKLJBPS-UHFFFAOYSA-N	3	0.038324	0.0781441	0.0837327	45.7694	Saar	Industrial
Benzotriazole	95-14-7	pos	2011	S2	365	[M+H]+	InChI=1S/C6H5N3/c1-2-4-6-5(3-1)7-9-8-6/h1-4H,(H,7,8,9)	QRUDEWIWKLJBPS-UHFFFAOYSA-N	3	0.0430393	0.268822	0.271221	15.8687	Saar	Industrial
Benzotriazole	95-14-7	pos	2012	D1	365	[M+H]+	InChI=1S/C6H5N3/c1-2-4-6-5(3-1)7-9-8-6/h1-4H,(H,7,8,9)	QRUDEWIWKLJBPS-UHFFFAOYSA-N	3	0.017073	0.0359623	0.0382483	44.6373	Danube	Industrial
Benzotriazole	95-14-7	pos	2012	E5	365	[M+H]+	InChI=1S/C6H5N3/c1-2-4-6-5(3-1)7-9-8-6/h1-4H,(H,7,8,9)	QRUDEWIWKLJBPS-UHFFFAOYSA-N	3	0.0129798	0.150657	0.151042	8.59354	Elbe	Industrial
Benzotriazole	95-14-7	pos	2012	E1	365	[M+H]+	InChI=1S/C6H5N3/c1-2-4-6-5(3-1)7-9-8-6/h1-4H,(H,7,8,9)	QRUDEWIWKLJBPS-UHFFFAOYSA-N	2	0.021944	0.0366533	0.0398024	55.1322	Elbe	Industrial
Benzotriazole	95-14-7	pos	2012	E2	365	[M+H]+	InChI=1S/C6H5N3/c1-2-4-6-5(3-1)7-9-8-6/h1-4H,(H,7,8,9)	QRUDEWIWKLJBPS-UHFFFAOYSA-N	3	0.0268077	0.04842	0.0537568	49.8685	Elbe	Industrial
Benzotriazole	95-14-7	pos	2012	R4	365	[M+H]+	InChI=1S/C6H5N3/c1-2-4-6-5(3-1)7-9-8-6/h1-4H,(H,7,8,9)	QRUDEWIWKLJBPS-UHFFFAOYSA-N	3	0.0100847	0.0677448	0.068273	14.7711	Rhine	Industrial
Benzotriazole	95-14-7	pos	2012	R1	365	[M+H]+	InChI=1S/C6H5N3/c1-2-4-6-5(3-1)7-9-8-6/h1-4H,(H,7,8,9)	QRUDEWIWKLJBPS-UHFFFAOYSA-N	3	0.00683854	0.111026	0.111166	6.15167	Rhine	Industrial
Benzotriazole	95-14-7	pos	2012	Sa	365	[M+H]+	InChI=1S/C6H5N3/c1-2-4-6-5(3-1)7-9-8-6/h1-4H,(H,7,8,9)	QRUDEWIWKLJBPS-UHFFFAOYSA-N	3	0.00331615	0.190493	0.190512	1.74065	Saale	Industrial
Benzotriazole	95-14-7	pos	2012	S1	365	[M+H]+	InChI=1S/C6H5N3/c1-2-4-6-5(3-1)7-9-8-6/h1-4H,(H,7,8,9)	QRUDEWIWKLJBPS-UHFFFAOYSA-N	3	0.0641131	0.0796975	0.096532	66.4164	Saar	Industrial
Benzotriazole	95-14-7	pos	2012	S2	365	[M+H]+	InChI=1S/C6H5N3/c1-2-4-6-5(3-1)7-9-8-6/h1-4H,(H,7,8,9)	QRUDEWIWKLJBPS-UHFFFAOYSA-N	3	0.0628752	1.03187	1.03313	6.08587	Saar	Industrial
Benzotriazole	95-14-7	pos	2013	D1	365	[M+H]+	InChI=1S/C6H5N3/c1-2-4-6-5(3-1)7-9-8-6/h1-4H,(H,7,8,9)	QRUDEWIWKLJBPS-UHFFFAOYSA-N	3	0.0246871	0.0303251	0.035386	69.7652	Danube	Industrial
Benzotriazole	95-14-7	pos	2013	E5	365	[M+H]+	InChI=1S/C6H5N3/c1-2-4-6-5(3-1)7-9-8-6/h1-4H,(H,7,8,9)	QRUDEWIWKLJBPS-UHFFFAOYSA-N	3	0.0103918	0.0924788	0.0928601	11.1909	Elbe	Industrial
Benzotriazole	95-14-7	pos	2013	E1	365	[M+H]+	InChI=1S/C6H5N3/c1-2-4-6-5(3-1)7-9-8-6/h1-4H,(H,7,8,9)	QRUDEWIWKLJBPS-UHFFFAOYSA-N	3	0.00600457	0.0579198	0.0581322	10.3292	Elbe	Industrial
Benzotriazole	95-14-7	pos	2013	E2	365	[M+H]+	InChI=1S/C6H5N3/c1-2-4-6-5(3-1)7-9-8-6/h1-4H,(H,7,8,9)	QRUDEWIWKLJBPS-UHFFFAOYSA-N	3	0.0706838	0.087102	0.101214	69.836	Elbe	Industrial
Benzotriazole	95-14-7	pos	2013	R4	365	[M+H]+	InChI=1S/C6H5N3/c1-2-4-6-5(3-1)7-9-8-6/h1-4H,(H,7,8,9)	QRUDEWIWKLJBPS-UHFFFAOYSA-N	3	0.00375682	0.0560809	0.0561633	6.6891	Rhine	Industrial
Benzotriazole	95-14-7	pos	2013	R1	365	[M+H]+	InChI=1S/C6H5N3/c1-2-4-6-5(3-1)7-9-8-6/h1-4H,(H,7,8,9)	QRUDEWIWKLJBPS-UHFFFAOYSA-N	3	0.00267973	0.11791	0.117931	2.27229	Rhine	Industrial
Benzotriazole	95-14-7	pos	2013	Sa	365	[M+H]+	InChI=1S/C6H5N3/c1-2-4-6-5(3-1)7-9-8-6/h1-4H,(H,7,8,9)	QRUDEWIWKLJBPS-UHFFFAOYSA-N	3	0.0672199	0.188448	0.196465	34.2147	Saale	Industrial
Benzotriazole	95-14-7	pos	2013	S1	365	[M+H]+	InChI=1S/C6H5N3/c1-2-4-6-5(3-1)7-9-8-6/h1-4H,(H,7,8,9)	QRUDEWIWKLJBPS-UHFFFAOYSA-N	3	0.0170602	0.0673383	0.068717	24.8267	Saar	Industrial
Benzotriazole	95-14-7	pos	2013	S2	365	[M+H]+	InChI=1S/C6H5N3/c1-2-4-6-5(3-1)7-9-8-6/h1-4H,(H,7,8,9)	QRUDEWIWKLJBPS-UHFFFAOYSA-N	3	0.0119787	0.603421	0.603501	1.98487	Saar	Industrial
Benzotriazole	95-14-7	pos	2014	D1	365	[M+H]+	InChI=1S/C6H5N3/c1-2-4-6-5(3-1)7-9-8-6/h1-4H,(H,7,8,9)	QRUDEWIWKLJBPS-UHFFFAOYSA-N	3	0.0264227	0.0449515	0.0493002	53.5955	Danube	Industrial
Benzotriazole	95-14-7	pos	2014	E5	365	[M+H]+	InChI=1S/C6H5N3/c1-2-4-6-5(3-1)7-9-8-6/h1-4H,(H,7,8,9)	QRUDEWIWKLJBPS-UHFFFAOYSA-N	3	0.00578655	0.0968946	0.0970124	5.96476	Elbe	Industrial
Benzotriazole	95-14-7	pos	2014	E1	365	[M+H]+	InChI=1S/C6H5N3/c1-2-4-6-5(3-1)7-9-8-6/h1-4H,(H,7,8,9)	QRUDEWIWKLJBPS-UHFFFAOYSA-N	3	0.0391092	0.0542862	0.0639427	61.1628	Elbe	Industrial
Benzotriazole	95-14-7	pos	2014	E2	365	[M+H]+	InChI=1S/C6H5N3/c1-2-4-6-5(3-1)7-9-8-6/h1-4H,(H,7,8,9)	QRUDEWIWKLJBPS-UHFFFAOYSA-N	3	0.0170234	0.0590235	0.0604826	28.146	Elbe	Industrial
Benzotriazole	95-14-7	pos	2014	R4	365	[M+H]+	InChI=1S/C6H5N3/c1-2-4-6-5(3-1)7-9-8-6/h1-4H,(H,7,8,9)	QRUDEWIWKLJBPS-UHFFFAOYSA-N	3	0.0101262	0.0514869	0.0521174	19.4296	Rhine	Industrial
Benzotriazole	95-14-7	pos	2014	R1	365	[M+H]+	InChI=1S/C6H5N3/c1-2-4-6-5(3-1)7-9-8-6/h1-4H,(H,7,8,9)	QRUDEWIWKLJBPS-UHFFFAOYSA-N	3	0.030434	0.182145	0.183923	16.5471	Rhine	Industrial
Benzotriazole	95-14-7	pos	2014	Sa	365	[M+H]+	InChI=1S/C6H5N3/c1-2-4-6-5(3-1)7-9-8-6/h1-4H,(H,7,8,9)	QRUDEWIWKLJBPS-UHFFFAOYSA-N	3	0.10556	0.230719	0.24824	42.5232	Saale	Industrial
Benzotriazole	95-14-7	pos	2014	S1	365	[M+H]+	InChI=1S/C6H5N3/c1-2-4-6-5(3-1)7-9-8-6/h1-4H,(H,7,8,9)	QRUDEWIWKLJBPS-UHFFFAOYSA-N	3	0.0518007	0.0455043	0.059004	87.7919	Saar	Industrial
Benzotriazole	95-14-7	pos	2014	S2	365	[M+H]+	InChI=1S/C6H5N3/c1-2-4-6-5(3-1)7-9-8-6/h1-4H,(H,7,8,9)	QRUDEWIWKLJBPS-UHFFFAOYSA-N	3	0.0324488	0.0942721	0.0982559	33.0248	Saar	Industrial
Benzotriazole	95-14-7	pos	2015	D1	365	[M+H]+	InChI=1S/C6H5N3/c1-2-4-6-5(3-1)7-9-8-6/h1-4H,(H,7,8,9)	QRUDEWIWKLJBPS-UHFFFAOYSA-N	3	0.0327325	0.0322147	0.0400579	81.713	Danube	Industrial
Benzotriazole	95-14-7	pos	2015	E5	365	[M+H]+	InChI=1S/C6H5N3/c1-2-4-6-5(3-1)7-9-8-6/h1-4H,(H,7,8,9)	QRUDEWIWKLJBPS-UHFFFAOYSA-N	3	0.00558399	0.0804611	0.080593	6.92863	Elbe	Industrial
Benzotriazole	95-14-7	pos	2015	E1	365	[M+H]+	InChI=1S/C6H5N3/c1-2-4-6-5(3-1)7-9-8-6/h1-4H,(H,7,8,9)	QRUDEWIWKLJBPS-UHFFFAOYSA-N	3	0.0251079	0.0953364	0.0976469	25.713	Elbe	Industrial
Benzotriazole	95-14-7	pos	2015	E2	365	[M+H]+	InChI=1S/C6H5N3/c1-2-4-6-5(3-1)7-9-8-6/h1-4H,(H,7,8,9)	QRUDEWIWKLJBPS-UHFFFAOYSA-N	3	0.0622224	0.166333	0.174984	35.5588	Elbe	Industrial
Benzotriazole	95-14-7	pos	2015	R4	365	[M+H]+	InChI=1S/C6H5N3/c1-2-4-6-5(3-1)7-9-8-6/h1-4H,(H,7,8,9)	QRUDEWIWKLJBPS-UHFFFAOYSA-N	3	0.0229257	0.370707	0.371171	6.17659	Rhine	Industrial
Benzotriazole	95-14-7	pos	2015	R1	365	[M+H]+	InChI=1S/C6H5N3/c1-2-4-6-5(3-1)7-9-8-6/h1-4H,(H,7,8,9)	QRUDEWIWKLJBPS-UHFFFAOYSA-N	3	0.00453263	0.0873358	0.0874142	5.18523	Rhine	Industrial
Benzotriazole	95-14-7	pos	2015	Sa	365	[M+H]+	InChI=1S/C6H5N3/c1-2-4-6-5(3-1)7-9-8-6/h1-4H,(H,7,8,9)	QRUDEWIWKLJBPS-UHFFFAOYSA-N	3	0.136034	0.234169	0.263987	51.5304	Saale	Industrial
Benzotriazole	95-14-7	pos	2015	S1	365	[M+H]+	InChI=1S/C6H5N3/c1-2-4-6-5(3-1)7-9-8-6/h1-4H,(H,7,8,9)	QRUDEWIWKLJBPS-UHFFFAOYSA-N	3	0.0405749	0.0734776	0.0803802	50.4787	Saar	Industrial
Benzotriazole	95-14-7	pos	2015	S2	365	[M+H]+	InChI=1S/C6H5N3/c1-2-4-6-5(3-1)7-9-8-6/h1-4H,(H,7,8,9)	QRUDEWIWKLJBPS-UHFFFAOYSA-N	3	0.00999215	0.0599422	0.0605112	16.5129	Saar	Industrial
Benzotriazole	95-14-7	pos	2016	D1	365	[M+H]+	InChI=1S/C6H5N3/c1-2-4-6-5(3-1)7-9-8-6/h1-4H,(H,7,8,9)	QRUDEWIWKLJBPS-UHFFFAOYSA-N	2	0.0249445	0.0505224	0.0535129	46.6141	Danube	Industrial
Benzotriazole	95-14-7	pos	2016	E5	365	[M+H]+	InChI=1S/C6H5N3/c1-2-4-6-5(3-1)7-9-8-6/h1-4H,(H,7,8,9)	QRUDEWIWKLJBPS-UHFFFAOYSA-N	3	0.0204798	0.0519506	0.0545278	37.5585	Elbe	Industrial
Benzotriazole	95-14-7	pos	2016	E1	365	[M+H]+	InChI=1S/C6H5N3/c1-2-4-6-5(3-1)7-9-8-6/h1-4H,(H,7,8,9)	QRUDEWIWKLJBPS-UHFFFAOYSA-N	3	0.03836	0.14548	0.148815	25.7771	Elbe	Industrial
Benzotriazole	95-14-7	pos	2016	E2	365	[M+H]+	InChI=1S/C6H5N3/c1-2-4-6-5(3-1)7-9-8-6/h1-4H,(H,7,8,9)	QRUDEWIWKLJBPS-UHFFFAOYSA-N	3	0.0275725	0.130217	0.132313	20.8388	Elbe	Industrial
Benzotriazole	95-14-7	pos	2016	R4	365	[M+H]+	InChI=1S/C6H5N3/c1-2-4-6-5(3-1)7-9-8-6/h1-4H,(H,7,8,9)	QRUDEWIWKLJBPS-UHFFFAOYSA-N	3	0.0785272	0.455662	0.460354	17.058	Rhine	Industrial
Benzotriazole	95-14-7	pos	2016	R1	365	[M+H]+	InChI=1S/C6H5N3/c1-2-4-6-5(3-1)7-9-8-6/h1-4H,(H,7,8,9)	QRUDEWIWKLJBPS-UHFFFAOYSA-N	3	0.0199655	0.219425	0.220025	9.07419	Rhine	Industrial
Benzotriazole	95-14-7	pos	2016	Sa	365	[M+H]+	InChI=1S/C6H5N3/c1-2-4-6-5(3-1)7-9-8-6/h1-4H,(H,7,8,9)	QRUDEWIWKLJBPS-UHFFFAOYSA-N	3	0.092785	0.494041	0.499434	18.578	Saale	Industrial
Benzotriazole	95-14-7	pos	2016	S1	365	[M+H]+	InChI=1S/C6H5N3/c1-2-4-6-5(3-1)7-9-8-6/h1-4H,(H,7,8,9)	QRUDEWIWKLJBPS-UHFFFAOYSA-N	3	0.00856665	0.206642	0.206759	4.1433	Saar	Industrial
Benzotriazole	95-14-7	pos	2016	S2	365	[M+H]+	InChI=1S/C6H5N3/c1-2-4-6-5(3-1)7-9-8-6/h1-4H,(H,7,8,9)	QRUDEWIWKLJBPS-UHFFFAOYSA-N	3	0.191501	1.12355	1.13373	16.8913	Saar	Industrial
Benzotriazole	95-14-7	pos	2017	D1	365	[M+H]+	InChI=1S/C6H5N3/c1-2-4-6-5(3-1)7-9-8-6/h1-4H,(H,7,8,9)	QRUDEWIWKLJBPS-UHFFFAOYSA-N	3	0.0320671	0.0326437	0.0409622	78.2845	Danube	Industrial
Benzotriazole	95-14-7	pos	2017	E5	365	[M+H]+	InChI=1S/C6H5N3/c1-2-4-6-5(3-1)7-9-8-6/h1-4H,(H,7,8,9)	QRUDEWIWKLJBPS-UHFFFAOYSA-N	3	0.0244644	0.0310837	0.0385013	63.5418	Elbe	Industrial
Benzotriazole	95-14-7	pos	2017	E1	365	[M+H]+	InChI=1S/C6H5N3/c1-2-4-6-5(3-1)7-9-8-6/h1-4H,(H,7,8,9)	QRUDEWIWKLJBPS-UHFFFAOYSA-N	3	0.0381807	0.139759	0.143419	26.6217	Elbe	Industrial
Benzotriazole	95-14-7	pos	2017	E2	365	[M+H]+	InChI=1S/C6H5N3/c1-2-4-6-5(3-1)7-9-8-6/h1-4H,(H,7,8,9)	QRUDEWIWKLJBPS-UHFFFAOYSA-N	3	0.0785569	0.0914153	0.112693	69.7085	Elbe	Industrial
Benzotriazole	95-14-7	pos	2017	R4	365	[M+H]+	InChI=1S/C6H5N3/c1-2-4-6-5(3-1)7-9-8-6/h1-4H,(H,7,8,9)	QRUDEWIWKLJBPS-UHFFFAOYSA-N	3	0.0558077	0.585251	0.58701	9.50712	Rhine	Industrial
Benzotriazole	95-14-7	pos	2017	R1	365	[M+H]+	InChI=1S/C6H5N3/c1-2-4-6-5(3-1)7-9-8-6/h1-4H,(H,7,8,9)	QRUDEWIWKLJBPS-UHFFFAOYSA-N	3	0.0137711	0.145461	0.145884	9.43975	Rhine	Industrial
Benzotriazole	95-14-7	pos	2017	Sa	365	[M+H]+	InChI=1S/C6H5N3/c1-2-4-6-5(3-1)7-9-8-6/h1-4H,(H,7,8,9)	QRUDEWIWKLJBPS-UHFFFAOYSA-N	3	0.0969681	0.236718	0.251569	38.5453	Saale	Industrial
Benzotriazole	95-14-7	pos	2017	S1	365	[M+H]+	InChI=1S/C6H5N3/c1-2-4-6-5(3-1)7-9-8-6/h1-4H,(H,7,8,9)	QRUDEWIWKLJBPS-UHFFFAOYSA-N	3	0.0103072	0.292408	0.292531	3.52346	Saar	Industrial
Benzotriazole	95-14-7	pos	2017	S2	365	[M+H]+	InChI=1S/C6H5N3/c1-2-4-6-5(3-1)7-9-8-6/h1-4H,(H,7,8,9)	QRUDEWIWKLJBPS-UHFFFAOYSA-N	3	0.01375	2.09348	2.09351	0.656788	Saar	Industrial
Benzotriazole	95-14-7	pos	2018	D1	365	[M+H]+	InChI=1S/C6H5N3/c1-2-4-6-5(3-1)7-9-8-6/h1-4H,(H,7,8,9)	QRUDEWIWKLJBPS-UHFFFAOYSA-N	3	0.00697483	0.164127	0.164227	4.24708	Danube	Industrial
Benzotriazole	95-14-7	pos	2018	E5	365	[M+H]+	InChI=1S/C6H5N3/c1-2-4-6-5(3-1)7-9-8-6/h1-4H,(H,7,8,9)	QRUDEWIWKLJBPS-UHFFFAOYSA-N	3	0.00626499	0.160483	0.160564	3.90187	Elbe	Industrial
Benzotriazole	95-14-7	pos	2018	E1	365	[M+H]+	InChI=1S/C6H5N3/c1-2-4-6-5(3-1)7-9-8-6/h1-4H,(H,7,8,9)	QRUDEWIWKLJBPS-UHFFFAOYSA-N	3	0.036594	0.198848	0.201017	18.2044	Elbe	Industrial
Benzotriazole	95-14-7	pos	2018	E2	365	[M+H]+	InChI=1S/C6H5N3/c1-2-4-6-5(3-1)7-9-8-6/h1-4H,(H,7,8,9)	QRUDEWIWKLJBPS-UHFFFAOYSA-N	3	0.00708117	0.245676	0.245743	2.88154	Elbe	Industrial
Benzotriazole	95-14-7	pos	2018	R4	365	[M+H]+	InChI=1S/C6H5N3/c1-2-4-6-5(3-1)7-9-8-6/h1-4H,(H,7,8,9)	QRUDEWIWKLJBPS-UHFFFAOYSA-N	3	0.0315444	0.551353	0.551956	5.71503	Rhine	Industrial
Benzotriazole	95-14-7	pos	2018	R1	365	[M+H]+	InChI=1S/C6H5N3/c1-2-4-6-5(3-1)7-9-8-6/h1-4H,(H,7,8,9)	QRUDEWIWKLJBPS-UHFFFAOYSA-N	3	0.0118912	0.122023	0.122418	9.71357	Rhine	Industrial
Benzotriazole	95-14-7	pos	2018	Sa	365	[M+H]+	InChI=1S/C6H5N3/c1-2-4-6-5(3-1)7-9-8-6/h1-4H,(H,7,8,9)	QRUDEWIWKLJBPS-UHFFFAOYSA-N	3	0.0266142	0.192494	0.193738	13.7372	Saale	Industrial
Benzotriazole	95-14-7	pos	2018	S1	365	[M+H]+	InChI=1S/C6H5N3/c1-2-4-6-5(3-1)7-9-8-6/h1-4H,(H,7,8,9)	QRUDEWIWKLJBPS-UHFFFAOYSA-N	3	0.00955639	0.225287	0.225422	4.23933	Saar	Industrial
Benzotriazole	95-14-7	pos	2018	S2	365	[M+H]+	InChI=1S/C6H5N3/c1-2-4-6-5(3-1)7-9-8-6/h1-4H,(H,7,8,9)	QRUDEWIWKLJBPS-UHFFFAOYSA-N	3	0.0424313	0.962334	0.962963	4.40632	Saar	Industrial
Benzotriazole	95-14-7	pos	2019	D1	365	[M+H]+	InChI=1S/C6H5N3/c1-2-4-6-5(3-1)7-9-8-6/h1-4H,(H,7,8,9)	QRUDEWIWKLJBPS-UHFFFAOYSA-N	3	0.0168814	0.0483796	0.050353	33.5261	Danube	Industrial
Benzotriazole	95-14-7	pos	2019	E5	365	[M+H]+	InChI=1S/C6H5N3/c1-2-4-6-5(3-1)7-9-8-6/h1-4H,(H,7,8,9)	QRUDEWIWKLJBPS-UHFFFAOYSA-N	3	0.0123727	0.0477761	0.0488616	25.3219	Elbe	Industrial
Benzotriazole	95-14-7	pos	2019	E1	365	[M+H]+	InChI=1S/C6H5N3/c1-2-4-6-5(3-1)7-9-8-6/h1-4H,(H,7,8,9)	QRUDEWIWKLJBPS-UHFFFAOYSA-N	3	0.100438	0.198095	0.214463	46.8324	Elbe	Industrial
Benzotriazole	95-14-7	pos	2019	E2	365	[M+H]+	InChI=1S/C6H5N3/c1-2-4-6-5(3-1)7-9-8-6/h1-4H,(H,7,8,9)	QRUDEWIWKLJBPS-UHFFFAOYSA-N	3	0.0604012	0.141148	0.149407	40.4273	Elbe	Industrial
Benzotriazole	95-14-7	pos	2019	R4	365	[M+H]+	InChI=1S/C6H5N3/c1-2-4-6-5(3-1)7-9-8-6/h1-4H,(H,7,8,9)	QRUDEWIWKLJBPS-UHFFFAOYSA-N	3	0.0910135	0.247889	0.259903	35.0183	Rhine	Industrial
Benzotriazole	95-14-7	pos	2019	R1	365	[M+H]+	InChI=1S/C6H5N3/c1-2-4-6-5(3-1)7-9-8-6/h1-4H,(H,7,8,9)	QRUDEWIWKLJBPS-UHFFFAOYSA-N	3	0.0173836	0.019669	0.0238594	72.8585	Rhine	Industrial
Benzotriazole	95-14-7	pos	2019	Sa	365	[M+H]+	InChI=1S/C6H5N3/c1-2-4-6-5(3-1)7-9-8-6/h1-4H,(H,7,8,9)	QRUDEWIWKLJBPS-UHFFFAOYSA-N	3	0.16851	0.166382	0.219874	76.6391	Saale	Industrial
Benzotriazole	95-14-7	pos	2019	S1	365	[M+H]+	InChI=1S/C6H5N3/c1-2-4-6-5(3-1)7-9-8-6/h1-4H,(H,7,8,9)	QRUDEWIWKLJBPS-UHFFFAOYSA-N	3	0.0430429	0.06855	0.076336	56.3862	Saar	Industrial
Benzotriazole	95-14-7	pos	2019	S2	365	[M+H]+	InChI=1S/C6H5N3/c1-2-4-6-5(3-1)7-9-8-6/h1-4H,(H,7,8,9)	QRUDEWIWKLJBPS-UHFFFAOYSA-N	3	0.00165212	0.399577	0.399579	0.413465	Saar	Industrial
Benzotriazole	95-14-7	pos	2020	D1	365	[M+H]+	InChI=1S/C6H5N3/c1-2-4-6-5(3-1)7-9-8-6/h1-4H,(H,7,8,9)	QRUDEWIWKLJBPS-UHFFFAOYSA-N	3	0.0176	0.0889325	0.0901596	19.5209	Danube	Industrial
Benzotriazole	95-14-7	pos	2020	E5	365	[M+H]+	InChI=1S/C6H5N3/c1-2-4-6-5(3-1)7-9-8-6/h1-4H,(H,7,8,9)	QRUDEWIWKLJBPS-UHFFFAOYSA-N	3	0.00647863	0.0361282	0.036489	17.755	Elbe	Industrial
Benzotriazole	95-14-7	pos	2020	E1	365	[M+H]+	InChI=1S/C6H5N3/c1-2-4-6-5(3-1)7-9-8-6/h1-4H,(H,7,8,9)	QRUDEWIWKLJBPS-UHFFFAOYSA-N	3	0.0510023	0.135306	0.141194	36.1222	Elbe	Industrial
Benzotriazole	95-14-7	pos	2020	E2	365	[M+H]+	InChI=1S/C6H5N3/c1-2-4-6-5(3-1)7-9-8-6/h1-4H,(H,7,8,9)	QRUDEWIWKLJBPS-UHFFFAOYSA-N	3	0.12474	0.211327	0.231342	53.9203	Elbe	Industrial
Benzotriazole	95-14-7	pos	2020	R4	365	[M+H]+	InChI=1S/C6H5N3/c1-2-4-6-5(3-1)7-9-8-6/h1-4H,(H,7,8,9)	QRUDEWIWKLJBPS-UHFFFAOYSA-N	3	0.0304017	0.0966911	0.0996677	30.503	Rhine	Industrial
Benzotriazole	95-14-7	pos	2020	R1	365	[M+H]+	InChI=1S/C6H5N3/c1-2-4-6-5(3-1)7-9-8-6/h1-4H,(H,7,8,9)	QRUDEWIWKLJBPS-UHFFFAOYSA-N	3	0.0264816	0.0214155	0.0283805	93.3091	Rhine	Industrial
Benzotriazole	95-14-7	pos	2020	Sa	365	[M+H]+	InChI=1S/C6H5N3/c1-2-4-6-5(3-1)7-9-8-6/h1-4H,(H,7,8,9)	QRUDEWIWKLJBPS-UHFFFAOYSA-N	3	0.055638	0.169296	0.174924	31.8069	Saale	Industrial
Benzotriazole	95-14-7	pos	2020	S1	365	[M+H]+	InChI=1S/C6H5N3/c1-2-4-6-5(3-1)7-9-8-6/h1-4H,(H,7,8,9)	QRUDEWIWKLJBPS-UHFFFAOYSA-N	3	0.0488149	0.0432562	0.0558803	87.3561	Saar	Industrial
Benzotriazole	95-14-7	pos	2020	S2	365	[M+H]+	InChI=1S/C6H5N3/c1-2-4-6-5(3-1)7-9-8-6/h1-4H,(H,7,8,9)	QRUDEWIWKLJBPS-UHFFFAOYSA-N	3	0.119846	0.45911	0.46851	25.5802	Saar	Industrial
Benzotriazole	95-14-7	pos	2021	D1	365	[M+H]+	InChI=1S/C6H5N3/c1-2-4-6-5(3-1)7-9-8-6/h1-4H,(H,7,8,9)	QRUDEWIWKLJBPS-UHFFFAOYSA-N	2	0.000810616	0.0351364	0.0351411	2.30675	Danube	Industrial
Benzotriazole	95-14-7	pos	2021	E5	365	[M+H]+	InChI=1S/C6H5N3/c1-2-4-6-5(3-1)7-9-8-6/h1-4H,(H,7,8,9)	QRUDEWIWKLJBPS-UHFFFAOYSA-N	3	0.00872731	0.0423414	0.0429755	20.3076	Elbe	Industrial
Benzotriazole	95-14-7	pos	2021	E1	365	[M+H]+	InChI=1S/C6H5N3/c1-2-4-6-5(3-1)7-9-8-6/h1-4H,(H,7,8,9)	QRUDEWIWKLJBPS-UHFFFAOYSA-N	3	0.020405	0.109241	0.110579	18.4529	Elbe	Industrial
Benzotriazole	95-14-7	pos	2021	E2	365	[M+H]+	InChI=1S/C6H5N3/c1-2-4-6-5(3-1)7-9-8-6/h1-4H,(H,7,8,9)	QRUDEWIWKLJBPS-UHFFFAOYSA-N	3	0.0341427	0.0683081	0.0733864	46.5245	Elbe	Industrial
Benzotriazole	95-14-7	pos	2021	R4	365	[M+H]+	InChI=1S/C6H5N3/c1-2-4-6-5(3-1)7-9-8-6/h1-4H,(H,7,8,9)	QRUDEWIWKLJBPS-UHFFFAOYSA-N	3	0.0159795	0.0419117	0.0437011	36.5653	Rhine	Industrial
Benzotriazole	95-14-7	pos	2021	R1	365	[M+H]+	InChI=1S/C6H5N3/c1-2-4-6-5(3-1)7-9-8-6/h1-4H,(H,7,8,9)	QRUDEWIWKLJBPS-UHFFFAOYSA-N	3	0.0107894	0.0198698	0.0219949	49.0543	Rhine	Industrial
Benzotriazole	95-14-7	pos	2021	Sa	365	[M+H]+	InChI=1S/C6H5N3/c1-2-4-6-5(3-1)7-9-8-6/h1-4H,(H,7,8,9)	QRUDEWIWKLJBPS-UHFFFAOYSA-N	3	0.110425	0.264273	0.281113	39.2813	Saale	Industrial
Benzotriazole	95-14-7	pos	2021	S1	365	[M+H]+	InChI=1S/C6H5N3/c1-2-4-6-5(3-1)7-9-8-6/h1-4H,(H,7,8,9)	QRUDEWIWKLJBPS-UHFFFAOYSA-N	3	0.0259092	0.0358363	0.042373	61.1456	Saar	Industrial
Benzotriazole	95-14-7	pos	2021	S2	365	[M+H]+	InChI=1S/C6H5N3/c1-2-4-6-5(3-1)7-9-8-6/h1-4H,(H,7,8,9)	QRUDEWIWKLJBPS-UHFFFAOYSA-N	3	0.0530558	0.0911891	0.103426	51.2986	Saar	Industrial
Benzotriazole	95-14-7	pos	2022	D1	365	[M+H]+	InChI=1S/C6H5N3/c1-2-4-6-5(3-1)7-9-8-6/h1-4H,(H,7,8,9)	QRUDEWIWKLJBPS-UHFFFAOYSA-N	3	0.022785	0.0780365	0.0802992	28.3751	Danube	Industrial
Benzotriazole	95-14-7	pos	2022	E5	365	[M+H]+	InChI=1S/C6H5N3/c1-2-4-6-5(3-1)7-9-8-6/h1-4H,(H,7,8,9)	QRUDEWIWKLJBPS-UHFFFAOYSA-N	3	0.00932506	0.0155509	0.0171259	54.4499	Elbe	Industrial
Benzotriazole	95-14-7	pos	2022	E1	365	[M+H]+	InChI=1S/C6H5N3/c1-2-4-6-5(3-1)7-9-8-6/h1-4H,(H,7,8,9)	QRUDEWIWKLJBPS-UHFFFAOYSA-N	3	0.0417087	0.185126	0.18852	22.1243	Elbe	Industrial
Benzotriazole	95-14-7	pos	2022	E2	365	[M+H]+	InChI=1S/C6H5N3/c1-2-4-6-5(3-1)7-9-8-6/h1-4H,(H,7,8,9)	QRUDEWIWKLJBPS-UHFFFAOYSA-N	3	0.00890198	0.0713757	0.0717301	12.4104	Elbe	Industrial
Benzotriazole	95-14-7	pos	2022	R4	365	[M+H]+	InChI=1S/C6H5N3/c1-2-4-6-5(3-1)7-9-8-6/h1-4H,(H,7,8,9)	QRUDEWIWKLJBPS-UHFFFAOYSA-N	3	0.0171178	0.083205	0.0842998	20.3059	Rhine	Industrial
Benzotriazole	95-14-7	pos	2022	R1	365	[M+H]+	InChI=1S/C6H5N3/c1-2-4-6-5(3-1)7-9-8-6/h1-4H,(H,7,8,9)	QRUDEWIWKLJBPS-UHFFFAOYSA-N	3	0.013771	0.0361307	0.0381158	36.1294	Rhine	Industrial
Benzotriazole	95-14-7	pos	2022	Sa	365	[M+H]+	InChI=1S/C6H5N3/c1-2-4-6-5(3-1)7-9-8-6/h1-4H,(H,7,8,9)	QRUDEWIWKLJBPS-UHFFFAOYSA-N	3	0.00543194	0.275537	0.275573	1.97115	Saale	Industrial
Benzotriazole	95-14-7	pos	2022	S1	365	[M+H]+	InChI=1S/C6H5N3/c1-2-4-6-5(3-1)7-9-8-6/h1-4H,(H,7,8,9)	QRUDEWIWKLJBPS-UHFFFAOYSA-N	3	0.0266457	0.0316303	0.0407385	65.4066	Saar	Industrial
Benzotriazole	95-14-7	pos	2022	S2	365	[M+H]+	InChI=1S/C6H5N3/c1-2-4-6-5(3-1)7-9-8-6/h1-4H,(H,7,8,9)	QRUDEWIWKLJBPS-UHFFFAOYSA-N	3	0.0309365	0.0859379	0.0894301	34.5929	Saar	Industrial
Carbamazepine	298-46-4	pos	2005	E5	365	[M+H]+	InChI=1S/C15H12N2O/c16-15(18)17-13-7-3-1-5-11(13)9-10-12-6-2-4-8-14(12)17/h1-10H,(H2,16,18)	FFGPTBGBLSHEPO-UHFFFAOYSA-N	3	0.0433668	0.385258	0.38688	11.2093	Elbe	HMP/VMP
Carbamazepine	298-46-4	pos	2005	E4	365	[M+H]+	InChI=1S/C15H12N2O/c16-15(18)17-13-7-3-1-5-11(13)9-10-12-6-2-4-8-14(12)17/h1-10H,(H2,16,18)	FFGPTBGBLSHEPO-UHFFFAOYSA-N	3	0.0596729	0.641476	0.643392	9.27473	Elbe	HMP/VMP
Carbamazepine	298-46-4	pos	2005	E1	365	[M+H]+	InChI=1S/C15H12N2O/c16-15(18)17-13-7-3-1-5-11(13)9-10-12-6-2-4-8-14(12)17/h1-10H,(H2,16,18)	FFGPTBGBLSHEPO-UHFFFAOYSA-N	3	0.0956593	0.238771	0.249685	38.3121	Elbe	HMP/VMP
Carbamazepine	298-46-4	pos	2005	E2	365	[M+H]+	InChI=1S/C15H12N2O/c16-15(18)17-13-7-3-1-5-11(13)9-10-12-6-2-4-8-14(12)17/h1-10H,(H2,16,18)	FFGPTBGBLSHEPO-UHFFFAOYSA-N	3	0.041248	0.780316	0.781057	5.28105	Elbe	HMP/VMP
Carbamazepine	298-46-4	pos	2005	Mu	365	[M+H]+	InChI=1S/C15H12N2O/c16-15(18)17-13-7-3-1-5-11(13)9-10-12-6-2-4-8-14(12)17/h1-10H,(H2,16,18)	FFGPTBGBLSHEPO-UHFFFAOYSA-N	3	0.135224	0.462696	0.477185	28.3378	Mulde	HMP/VMP
Carbamazepine	298-46-4	pos	2005	R4	365	[M+H]+	InChI=1S/C15H12N2O/c16-15(18)17-13-7-3-1-5-11(13)9-10-12-6-2-4-8-14(12)17/h1-10H,(H2,16,18)	FFGPTBGBLSHEPO-UHFFFAOYSA-N	3	0.0294879	0.478443	0.479063	6.15533	Rhine	HMP/VMP
Carbamazepine	298-46-4	pos	2005	R3	365	[M+H]+	InChI=1S/C15H12N2O/c16-15(18)17-13-7-3-1-5-11(13)9-10-12-6-2-4-8-14(12)17/h1-10H,(H2,16,18)	FFGPTBGBLSHEPO-UHFFFAOYSA-N	3	0.0126101	0.154015	0.154368	8.1689	Rhine	HMP/VMP
Carbamazepine	298-46-4	pos	2005	R1	365	[M+H]+	InChI=1S/C15H12N2O/c16-15(18)17-13-7-3-1-5-11(13)9-10-12-6-2-4-8-14(12)17/h1-10H,(H2,16,18)	FFGPTBGBLSHEPO-UHFFFAOYSA-N	3	0.100659	0.241166	0.257242	39.1299	Rhine	HMP/VMP
Carbamazepine	298-46-4	pos	2005	Sa	365	[M+H]+	InChI=1S/C15H12N2O/c16-15(18)17-13-7-3-1-5-11(13)9-10-12-6-2-4-8-14(12)17/h1-10H,(H2,16,18)	FFGPTBGBLSHEPO-UHFFFAOYSA-N	3	0.0174145	1.12316	1.12325	1.55036	Saale	HMP/VMP
Carbamazepine	298-46-4	pos	2006	E5	365	[M+H]+	InChI=1S/C15H12N2O/c16-15(18)17-13-7-3-1-5-11(13)9-10-12-6-2-4-8-14(12)17/h1-10H,(H2,16,18)	FFGPTBGBLSHEPO-UHFFFAOYSA-N	3	0.031819	0.454018	0.454742	6.99716	Elbe	HMP/VMP
Carbamazepine	298-46-4	pos	2006	E4	365	[M+H]+	InChI=1S/C15H12N2O/c16-15(18)17-13-7-3-1-5-11(13)9-10-12-6-2-4-8-14(12)17/h1-10H,(H2,16,18)	FFGPTBGBLSHEPO-UHFFFAOYSA-N	3	0.0272266	0.604347	0.60475	4.50213	Elbe	HMP/VMP
Carbamazepine	298-46-4	pos	2006	E1	365	[M+H]+	InChI=1S/C15H12N2O/c16-15(18)17-13-7-3-1-5-11(13)9-10-12-6-2-4-8-14(12)17/h1-10H,(H2,16,18)	FFGPTBGBLSHEPO-UHFFFAOYSA-N	3	0.00947279	0.225204	0.225338	4.20381	Elbe	HMP/VMP
Carbamazepine	298-46-4	pos	2006	E2	365	[M+H]+	InChI=1S/C15H12N2O/c16-15(18)17-13-7-3-1-5-11(13)9-10-12-6-2-4-8-14(12)17/h1-10H,(H2,16,18)	FFGPTBGBLSHEPO-UHFFFAOYSA-N	3	0.0156605	0.455319	0.455501	3.43809	Elbe	HMP/VMP
Carbamazepine	298-46-4	pos	2006	Mu	365	[M+H]+	InChI=1S/C15H12N2O/c16-15(18)17-13-7-3-1-5-11(13)9-10-12-6-2-4-8-14(12)17/h1-10H,(H2,16,18)	FFGPTBGBLSHEPO-UHFFFAOYSA-N	3	0.0953103	0.440071	0.447405	21.3029	Mulde	HMP/VMP
Carbamazepine	298-46-4	pos	2006	R4	365	[M+H]+	InChI=1S/C15H12N2O/c16-15(18)17-13-7-3-1-5-11(13)9-10-12-6-2-4-8-14(12)17/h1-10H,(H2,16,18)	FFGPTBGBLSHEPO-UHFFFAOYSA-N	3	0.0147655	0.526724	0.526862	2.80254	Rhine	HMP/VMP
Carbamazepine	298-46-4	pos	2006	R3	365	[M+H]+	InChI=1S/C15H12N2O/c16-15(18)17-13-7-3-1-5-11(13)9-10-12-6-2-4-8-14(12)17/h1-10H,(H2,16,18)	FFGPTBGBLSHEPO-UHFFFAOYSA-N	3	0.0270335	0.172841	0.174302	15.5096	Rhine	HMP/VMP
Carbamazepine	298-46-4	pos	2006	R1	365	[M+H]+	InChI=1S/C15H12N2O/c16-15(18)17-13-7-3-1-5-11(13)9-10-12-6-2-4-8-14(12)17/h1-10H,(H2,16,18)	FFGPTBGBLSHEPO-UHFFFAOYSA-N	3	0.0453261	0.130317	0.134987	33.5781	Rhine	HMP/VMP
Carbamazepine	298-46-4	pos	2006	Sa	365	[M+H]+	InChI=1S/C15H12N2O/c16-15(18)17-13-7-3-1-5-11(13)9-10-12-6-2-4-8-14(12)17/h1-10H,(H2,16,18)	FFGPTBGBLSHEPO-UHFFFAOYSA-N	3	0.0363719	0.81424	0.814777	4.46403	Saale	HMP/VMP
Carbamazepine	298-46-4	pos	2006	S1	365	[M+H]+	InChI=1S/C15H12N2O/c16-15(18)17-13-7-3-1-5-11(13)9-10-12-6-2-4-8-14(12)17/h1-10H,(H2,16,18)	FFGPTBGBLSHEPO-UHFFFAOYSA-N	3	0.0843401	0.491368	0.495896	17.0076	Saar	HMP/VMP
Carbamazepine	298-46-4	pos	2006	S2	365	[M+H]+	InChI=1S/C15H12N2O/c16-15(18)17-13-7-3-1-5-11(13)9-10-12-6-2-4-8-14(12)17/h1-10H,(H2,16,18)	FFGPTBGBLSHEPO-UHFFFAOYSA-N	3	0.0498859	0.59445	0.595804	8.37288	Saar	HMP/VMP
Carbamazepine	298-46-4	pos	2007	E5	365	[M+H]+	InChI=1S/C15H12N2O/c16-15(18)17-13-7-3-1-5-11(13)9-10-12-6-2-4-8-14(12)17/h1-10H,(H2,16,18)	FFGPTBGBLSHEPO-UHFFFAOYSA-N	3	0.0268441	0.35942	0.360108	7.45446	Elbe	HMP/VMP
Carbamazepine	298-46-4	pos	2007	E4	365	[M+H]+	InChI=1S/C15H12N2O/c16-15(18)17-13-7-3-1-5-11(13)9-10-12-6-2-4-8-14(12)17/h1-10H,(H2,16,18)	FFGPTBGBLSHEPO-UHFFFAOYSA-N	3	0.0864077	0.665462	0.669042	12.9151	Elbe	HMP/VMP
Carbamazepine	298-46-4	pos	2007	E1	365	[M+H]+	InChI=1S/C15H12N2O/c16-15(18)17-13-7-3-1-5-11(13)9-10-12-6-2-4-8-14(12)17/h1-10H,(H2,16,18)	FFGPTBGBLSHEPO-UHFFFAOYSA-N	3	0.0272321	0.277303	0.278201	9.78863	Elbe	HMP/VMP
Carbamazepine	298-46-4	pos	2007	E2	365	[M+H]+	InChI=1S/C15H12N2O/c16-15(18)17-13-7-3-1-5-11(13)9-10-12-6-2-4-8-14(12)17/h1-10H,(H2,16,18)	FFGPTBGBLSHEPO-UHFFFAOYSA-N	3	0.11386	0.728917	0.73455	15.5007	Elbe	HMP/VMP
Carbamazepine	298-46-4	pos	2007	Mu	365	[M+H]+	InChI=1S/C15H12N2O/c16-15(18)17-13-7-3-1-5-11(13)9-10-12-6-2-4-8-14(12)17/h1-10H,(H2,16,18)	FFGPTBGBLSHEPO-UHFFFAOYSA-N	3	0.0649962	0.530079	0.532857	12.1977	Mulde	HMP/VMP
Carbamazepine	298-46-4	pos	2007	R4	365	[M+H]+	InChI=1S/C15H12N2O/c16-15(18)17-13-7-3-1-5-11(13)9-10-12-6-2-4-8-14(12)17/h1-10H,(H2,16,18)	FFGPTBGBLSHEPO-UHFFFAOYSA-N	3	0.0322964	0.449379	0.450147	7.17464	Rhine	HMP/VMP
Carbamazepine	298-46-4	pos	2007	R3	365	[M+H]+	InChI=1S/C15H12N2O/c16-15(18)17-13-7-3-1-5-11(13)9-10-12-6-2-4-8-14(12)17/h1-10H,(H2,16,18)	FFGPTBGBLSHEPO-UHFFFAOYSA-N	3	0.0133236	0.20486	0.205143	6.49479	Rhine	HMP/VMP
Carbamazepine	298-46-4	pos	2007	R1	365	[M+H]+	InChI=1S/C15H12N2O/c16-15(18)17-13-7-3-1-5-11(13)9-10-12-6-2-4-8-14(12)17/h1-10H,(H2,16,18)	FFGPTBGBLSHEPO-UHFFFAOYSA-N	2	0.0740181	0.127838	0.138138	53.5829	Rhine	HMP/VMP
Carbamazepine	298-46-4	pos	2007	Sa	365	[M+H]+	InChI=1S/C15H12N2O/c16-15(18)17-13-7-3-1-5-11(13)9-10-12-6-2-4-8-14(12)17/h1-10H,(H2,16,18)	FFGPTBGBLSHEPO-UHFFFAOYSA-N	3	0.11912	0.754894	0.76109	15.6512	Saale	HMP/VMP
Carbamazepine	298-46-4	pos	2007	S1	365	[M+H]+	InChI=1S/C15H12N2O/c16-15(18)17-13-7-3-1-5-11(13)9-10-12-6-2-4-8-14(12)17/h1-10H,(H2,16,18)	FFGPTBGBLSHEPO-UHFFFAOYSA-N	3	0.0837741	0.405649	0.411504	20.358	Saar	HMP/VMP
Carbamazepine	298-46-4	pos	2007	S2	365	[M+H]+	InChI=1S/C15H12N2O/c16-15(18)17-13-7-3-1-5-11(13)9-10-12-6-2-4-8-14(12)17/h1-10H,(H2,16,18)	FFGPTBGBLSHEPO-UHFFFAOYSA-N	3	0.0835417	0.621106	0.624819	13.3705	Saar	HMP/VMP
Carbamazepine	298-46-4	pos	2008	E5	365	[M+H]+	InChI=1S/C15H12N2O/c16-15(18)17-13-7-3-1-5-11(13)9-10-12-6-2-4-8-14(12)17/h1-10H,(H2,16,18)	FFGPTBGBLSHEPO-UHFFFAOYSA-N	3	0.0275559	0.399322	0.399964	6.88959	Elbe	HMP/VMP
Carbamazepine	298-46-4	pos	2008	E4	365	[M+H]+	InChI=1S/C15H12N2O/c16-15(18)17-13-7-3-1-5-11(13)9-10-12-6-2-4-8-14(12)17/h1-10H,(H2,16,18)	FFGPTBGBLSHEPO-UHFFFAOYSA-N	3	0.0900861	0.644913	0.649291	13.8745	Elbe	HMP/VMP
Carbamazepine	298-46-4	pos	2008	E1	365	[M+H]+	InChI=1S/C15H12N2O/c16-15(18)17-13-7-3-1-5-11(13)9-10-12-6-2-4-8-14(12)17/h1-10H,(H2,16,18)	FFGPTBGBLSHEPO-UHFFFAOYSA-N	3	0.00197641	0.246026	0.246032	0.803315	Elbe	HMP/VMP
Carbamazepine	298-46-4	pos	2008	E2	365	[M+H]+	InChI=1S/C15H12N2O/c16-15(18)17-13-7-3-1-5-11(13)9-10-12-6-2-4-8-14(12)17/h1-10H,(H2,16,18)	FFGPTBGBLSHEPO-UHFFFAOYSA-N	3	0.0111122	0.558718	0.558792	1.98861	Elbe	HMP/VMP
Carbamazepine	298-46-4	pos	2008	Mu	365	[M+H]+	InChI=1S/C15H12N2O/c16-15(18)17-13-7-3-1-5-11(13)9-10-12-6-2-4-8-14(12)17/h1-10H,(H2,16,18)	FFGPTBGBLSHEPO-UHFFFAOYSA-N	3	0.105012	0.485631	0.493812	21.2655	Mulde	HMP/VMP
Carbamazepine	298-46-4	pos	2008	R4	365	[M+H]+	InChI=1S/C15H12N2O/c16-15(18)17-13-7-3-1-5-11(13)9-10-12-6-2-4-8-14(12)17/h1-10H,(H2,16,18)	FFGPTBGBLSHEPO-UHFFFAOYSA-N	3	0.0329051	0.470354	0.471103	6.9847	Rhine	HMP/VMP
Carbamazepine	298-46-4	pos	2008	R3	365	[M+H]+	InChI=1S/C15H12N2O/c16-15(18)17-13-7-3-1-5-11(13)9-10-12-6-2-4-8-14(12)17/h1-10H,(H2,16,18)	FFGPTBGBLSHEPO-UHFFFAOYSA-N	3	0.0149188	0.181097	0.181518	8.21887	Rhine	HMP/VMP
Carbamazepine	298-46-4	pos	2008	Sa	365	[M+H]+	InChI=1S/C15H12N2O/c16-15(18)17-13-7-3-1-5-11(13)9-10-12-6-2-4-8-14(12)17/h1-10H,(H2,16,18)	FFGPTBGBLSHEPO-UHFFFAOYSA-N	3	0.0938052	0.832106	0.835659	11.2253	Saale	HMP/VMP
Carbamazepine	298-46-4	pos	2008	S1	365	[M+H]+	InChI=1S/C15H12N2O/c16-15(18)17-13-7-3-1-5-11(13)9-10-12-6-2-4-8-14(12)17/h1-10H,(H2,16,18)	FFGPTBGBLSHEPO-UHFFFAOYSA-N	3	0.21969	0.433381	0.476541	46.101	Saar	HMP/VMP
Carbamazepine	298-46-4	pos	2008	S2	365	[M+H]+	InChI=1S/C15H12N2O/c16-15(18)17-13-7-3-1-5-11(13)9-10-12-6-2-4-8-14(12)17/h1-10H,(H2,16,18)	FFGPTBGBLSHEPO-UHFFFAOYSA-N	3	0.145364	0.697306	0.707132	20.5569	Saar	HMP/VMP
Carbamazepine	298-46-4	pos	2009	D3	365	[M+H]+	InChI=1S/C15H12N2O/c16-15(18)17-13-7-3-1-5-11(13)9-10-12-6-2-4-8-14(12)17/h1-10H,(H2,16,18)	FFGPTBGBLSHEPO-UHFFFAOYSA-N	3	0.0171499	0.0895928	0.0906927	18.9099	Danube	HMP/VMP
Carbamazepine	298-46-4	pos	2009	E5	365	[M+H]+	InChI=1S/C15H12N2O/c16-15(18)17-13-7-3-1-5-11(13)9-10-12-6-2-4-8-14(12)17/h1-10H,(H2,16,18)	FFGPTBGBLSHEPO-UHFFFAOYSA-N	3	0.035382	0.371979	0.37306	9.48425	Elbe	HMP/VMP
Carbamazepine	298-46-4	pos	2009	E4	365	[M+H]+	InChI=1S/C15H12N2O/c16-15(18)17-13-7-3-1-5-11(13)9-10-12-6-2-4-8-14(12)17/h1-10H,(H2,16,18)	FFGPTBGBLSHEPO-UHFFFAOYSA-N	3	0.0621489	0.601101	0.603158	10.3039	Elbe	HMP/VMP
Carbamazepine	298-46-4	pos	2009	E1	365	[M+H]+	InChI=1S/C15H12N2O/c16-15(18)17-13-7-3-1-5-11(13)9-10-12-6-2-4-8-14(12)17/h1-10H,(H2,16,18)	FFGPTBGBLSHEPO-UHFFFAOYSA-N	3	0.0120097	0.210911	0.211142	5.68798	Elbe	HMP/VMP
Carbamazepine	298-46-4	pos	2009	E2	365	[M+H]+	InChI=1S/C15H12N2O/c16-15(18)17-13-7-3-1-5-11(13)9-10-12-6-2-4-8-14(12)17/h1-10H,(H2,16,18)	FFGPTBGBLSHEPO-UHFFFAOYSA-N	3	0.058967	0.477839	0.48015	12.2809	Elbe	HMP/VMP
Carbamazepine	298-46-4	pos	2009	Mu	365	[M+H]+	InChI=1S/C15H12N2O/c16-15(18)17-13-7-3-1-5-11(13)9-10-12-6-2-4-8-14(12)17/h1-10H,(H2,16,18)	FFGPTBGBLSHEPO-UHFFFAOYSA-N	3	0.130409	0.455076	0.466556	27.9514	Mulde	HMP/VMP
Carbamazepine	298-46-4	pos	2009	R4	365	[M+H]+	InChI=1S/C15H12N2O/c16-15(18)17-13-7-3-1-5-11(13)9-10-12-6-2-4-8-14(12)17/h1-10H,(H2,16,18)	FFGPTBGBLSHEPO-UHFFFAOYSA-N	3	0.00889788	0.43711	0.43717	2.03534	Rhine	HMP/VMP
Carbamazepine	298-46-4	pos	2009	R3	365	[M+H]+	InChI=1S/C15H12N2O/c16-15(18)17-13-7-3-1-5-11(13)9-10-12-6-2-4-8-14(12)17/h1-10H,(H2,16,18)	FFGPTBGBLSHEPO-UHFFFAOYSA-N	3	0.00961797	0.201935	0.202087	4.75933	Rhine	HMP/VMP
Carbamazepine	298-46-4	pos	2009	Sa	365	[M+H]+	InChI=1S/C15H12N2O/c16-15(18)17-13-7-3-1-5-11(13)9-10-12-6-2-4-8-14(12)17/h1-10H,(H2,16,18)	FFGPTBGBLSHEPO-UHFFFAOYSA-N	3	0.300493	1.36884	1.39247	21.5798	Saale	HMP/VMP
Carbamazepine	298-46-4	pos	2009	S1	365	[M+H]+	InChI=1S/C15H12N2O/c16-15(18)17-13-7-3-1-5-11(13)9-10-12-6-2-4-8-14(12)17/h1-10H,(H2,16,18)	FFGPTBGBLSHEPO-UHFFFAOYSA-N	3	0.126278	0.468988	0.481146	26.2452	Saar	HMP/VMP
Carbamazepine	298-46-4	pos	2009	S2	365	[M+H]+	InChI=1S/C15H12N2O/c16-15(18)17-13-7-3-1-5-11(13)9-10-12-6-2-4-8-14(12)17/h1-10H,(H2,16,18)	FFGPTBGBLSHEPO-UHFFFAOYSA-N	3	0.0233894	0.567568	0.567894	4.11862	Saar	HMP/VMP
Carbamazepine	298-46-4	pos	2010	D3	365	[M+H]+	InChI=1S/C15H12N2O/c16-15(18)17-13-7-3-1-5-11(13)9-10-12-6-2-4-8-14(12)17/h1-10H,(H2,16,18)	FFGPTBGBLSHEPO-UHFFFAOYSA-N	3	0.0112353	0.0707965	0.0714054	15.7345	Danube	HMP/VMP
Carbamazepine	298-46-4	pos	2010	E5	365	[M+H]+	InChI=1S/C15H12N2O/c16-15(18)17-13-7-3-1-5-11(13)9-10-12-6-2-4-8-14(12)17/h1-10H,(H2,16,18)	FFGPTBGBLSHEPO-UHFFFAOYSA-N	3	0.0756743	0.327042	0.333102	22.7181	Elbe	HMP/VMP
Carbamazepine	298-46-4	pos	2010	E4	365	[M+H]+	InChI=1S/C15H12N2O/c16-15(18)17-13-7-3-1-5-11(13)9-10-12-6-2-4-8-14(12)17/h1-10H,(H2,16,18)	FFGPTBGBLSHEPO-UHFFFAOYSA-N	3	0.0443233	0.496752	0.49805	8.89937	Elbe	HMP/VMP
Carbamazepine	298-46-4	pos	2010	E1	365	[M+H]+	InChI=1S/C15H12N2O/c16-15(18)17-13-7-3-1-5-11(13)9-10-12-6-2-4-8-14(12)17/h1-10H,(H2,16,18)	FFGPTBGBLSHEPO-UHFFFAOYSA-N	3	0.0478442	0.183694	0.188139	25.4303	Elbe	HMP/VMP
Carbamazepine	298-46-4	pos	2010	E2	365	[M+H]+	InChI=1S/C15H12N2O/c16-15(18)17-13-7-3-1-5-11(13)9-10-12-6-2-4-8-14(12)17/h1-10H,(H2,16,18)	FFGPTBGBLSHEPO-UHFFFAOYSA-N	2	0.0106863	0.348099	0.348181	3.06918	Elbe	HMP/VMP
Carbamazepine	298-46-4	pos	2010	Mu	365	[M+H]+	InChI=1S/C15H12N2O/c16-15(18)17-13-7-3-1-5-11(13)9-10-12-6-2-4-8-14(12)17/h1-10H,(H2,16,18)	FFGPTBGBLSHEPO-UHFFFAOYSA-N	3	0.115151	0.33876	0.353389	32.5847	Mulde	HMP/VMP
Carbamazepine	298-46-4	pos	2010	R4	365	[M+H]+	InChI=1S/C15H12N2O/c16-15(18)17-13-7-3-1-5-11(13)9-10-12-6-2-4-8-14(12)17/h1-10H,(H2,16,18)	FFGPTBGBLSHEPO-UHFFFAOYSA-N	3	0.0210068	0.414581	0.414935	5.06267	Rhine	HMP/VMP
Carbamazepine	298-46-4	pos	2010	R3	365	[M+H]+	InChI=1S/C15H12N2O/c16-15(18)17-13-7-3-1-5-11(13)9-10-12-6-2-4-8-14(12)17/h1-10H,(H2,16,18)	FFGPTBGBLSHEPO-UHFFFAOYSA-N	3	0.0305297	0.178638	0.180295	16.9332	Rhine	HMP/VMP
Carbamazepine	298-46-4	pos	2010	Sa	365	[M+H]+	InChI=1S/C15H12N2O/c16-15(18)17-13-7-3-1-5-11(13)9-10-12-6-2-4-8-14(12)17/h1-10H,(H2,16,18)	FFGPTBGBLSHEPO-UHFFFAOYSA-N	3	0.223098	0.98241	1.00069	22.2945	Saale	HMP/VMP
Carbamazepine	298-46-4	pos	2010	S1	365	[M+H]+	InChI=1S/C15H12N2O/c16-15(18)17-13-7-3-1-5-11(13)9-10-12-6-2-4-8-14(12)17/h1-10H,(H2,16,18)	FFGPTBGBLSHEPO-UHFFFAOYSA-N	3	0.0857195	0.353795	0.360768	23.7603	Saar	HMP/VMP
Carbamazepine	298-46-4	pos	2010	S2	365	[M+H]+	InChI=1S/C15H12N2O/c16-15(18)17-13-7-3-1-5-11(13)9-10-12-6-2-4-8-14(12)17/h1-10H,(H2,16,18)	FFGPTBGBLSHEPO-UHFFFAOYSA-N	3	0.217026	0.472546	0.500901	43.3271	Saar	HMP/VMP
Carbamazepine	298-46-4	pos	2011	D3	365	[M+H]+	InChI=1S/C15H12N2O/c16-15(18)17-13-7-3-1-5-11(13)9-10-12-6-2-4-8-14(12)17/h1-10H,(H2,16,18)	FFGPTBGBLSHEPO-UHFFFAOYSA-N	3	0.00694781	0.0768595	0.077076	9.01423	Danube	HMP/VMP
Carbamazepine	298-46-4	pos	2011	E5	365	[M+H]+	InChI=1S/C15H12N2O/c16-15(18)17-13-7-3-1-5-11(13)9-10-12-6-2-4-8-14(12)17/h1-10H,(H2,16,18)	FFGPTBGBLSHEPO-UHFFFAOYSA-N	3	0.0126822	0.319314	0.319481	3.96963	Elbe	HMP/VMP
Carbamazepine	298-46-4	pos	2011	E4	365	[M+H]+	InChI=1S/C15H12N2O/c16-15(18)17-13-7-3-1-5-11(13)9-10-12-6-2-4-8-14(12)17/h1-10H,(H2,16,18)	FFGPTBGBLSHEPO-UHFFFAOYSA-N	3	0.0304098	0.309274	0.310305	9.79996	Elbe	HMP/VMP
Carbamazepine	298-46-4	pos	2011	E1	365	[M+H]+	InChI=1S/C15H12N2O/c16-15(18)17-13-7-3-1-5-11(13)9-10-12-6-2-4-8-14(12)17/h1-10H,(H2,16,18)	FFGPTBGBLSHEPO-UHFFFAOYSA-N	2	0.0135497	0.169674	0.169944	7.97302	Elbe	HMP/VMP
Carbamazepine	298-46-4	pos	2011	E2	365	[M+H]+	InChI=1S/C15H12N2O/c16-15(18)17-13-7-3-1-5-11(13)9-10-12-6-2-4-8-14(12)17/h1-10H,(H2,16,18)	FFGPTBGBLSHEPO-UHFFFAOYSA-N	3	0.0159574	0.283791	0.284096	5.61691	Elbe	HMP/VMP
Carbamazepine	298-46-4	pos	2011	Mu	365	[M+H]+	InChI=1S/C15H12N2O/c16-15(18)17-13-7-3-1-5-11(13)9-10-12-6-2-4-8-14(12)17/h1-10H,(H2,16,18)	FFGPTBGBLSHEPO-UHFFFAOYSA-N	3	0.12291	0.219125	0.246167	49.9296	Mulde	HMP/VMP
Carbamazepine	298-46-4	pos	2011	R4	365	[M+H]+	InChI=1S/C15H12N2O/c16-15(18)17-13-7-3-1-5-11(13)9-10-12-6-2-4-8-14(12)17/h1-10H,(H2,16,18)	FFGPTBGBLSHEPO-UHFFFAOYSA-N	3	0.166348	0.422059	0.446845	37.2272	Rhine	HMP/VMP
Carbamazepine	298-46-4	pos	2011	R3	365	[M+H]+	InChI=1S/C15H12N2O/c16-15(18)17-13-7-3-1-5-11(13)9-10-12-6-2-4-8-14(12)17/h1-10H,(H2,16,18)	FFGPTBGBLSHEPO-UHFFFAOYSA-N	3	0.00905947	0.158916	0.159092	5.69447	Rhine	HMP/VMP
Carbamazepine	298-46-4	pos	2011	R1	365	[M+H]+	InChI=1S/C15H12N2O/c16-15(18)17-13-7-3-1-5-11(13)9-10-12-6-2-4-8-14(12)17/h1-10H,(H2,16,18)	FFGPTBGBLSHEPO-UHFFFAOYSA-N	2	0.0701078	0.159518	0.167044	41.9697	Rhine	HMP/VMP
Carbamazepine	298-46-4	pos	2011	Sa	365	[M+H]+	InChI=1S/C15H12N2O/c16-15(18)17-13-7-3-1-5-11(13)9-10-12-6-2-4-8-14(12)17/h1-10H,(H2,16,18)	FFGPTBGBLSHEPO-UHFFFAOYSA-N	3	0.395393	1.1736	1.22042	32.3982	Saale	HMP/VMP
Carbamazepine	298-46-4	pos	2011	S1	365	[M+H]+	InChI=1S/C15H12N2O/c16-15(18)17-13-7-3-1-5-11(13)9-10-12-6-2-4-8-14(12)17/h1-10H,(H2,16,18)	FFGPTBGBLSHEPO-UHFFFAOYSA-N	3	0.0564934	0.373239	0.376203	15.0167	Saar	HMP/VMP
Carbamazepine	298-46-4	pos	2011	S2	365	[M+H]+	InChI=1S/C15H12N2O/c16-15(18)17-13-7-3-1-5-11(13)9-10-12-6-2-4-8-14(12)17/h1-10H,(H2,16,18)	FFGPTBGBLSHEPO-UHFFFAOYSA-N	3	0.0757416	0.44576	0.449943	16.8336	Saar	HMP/VMP
Carbamazepine	298-46-4	pos	2012	D3	365	[M+H]+	InChI=1S/C15H12N2O/c16-15(18)17-13-7-3-1-5-11(13)9-10-12-6-2-4-8-14(12)17/h1-10H,(H2,16,18)	FFGPTBGBLSHEPO-UHFFFAOYSA-N	2	0.00140246	0.0797821	0.0797883	1.75773	Danube	HMP/VMP
Carbamazepine	298-46-4	pos	2012	E5	365	[M+H]+	InChI=1S/C15H12N2O/c16-15(18)17-13-7-3-1-5-11(13)9-10-12-6-2-4-8-14(12)17/h1-10H,(H2,16,18)	FFGPTBGBLSHEPO-UHFFFAOYSA-N	3	0.0619789	0.349677	0.353253	17.5452	Elbe	HMP/VMP
Carbamazepine	298-46-4	pos	2012	E4	365	[M+H]+	InChI=1S/C15H12N2O/c16-15(18)17-13-7-3-1-5-11(13)9-10-12-6-2-4-8-14(12)17/h1-10H,(H2,16,18)	FFGPTBGBLSHEPO-UHFFFAOYSA-N	3	0.0403271	0.409844	0.411128	9.80889	Elbe	HMP/VMP
Carbamazepine	298-46-4	pos	2012	E1	365	[M+H]+	InChI=1S/C15H12N2O/c16-15(18)17-13-7-3-1-5-11(13)9-10-12-6-2-4-8-14(12)17/h1-10H,(H2,16,18)	FFGPTBGBLSHEPO-UHFFFAOYSA-N	3	0.0426117	0.217912	0.220852	19.2942	Elbe	HMP/VMP
Carbamazepine	298-46-4	pos	2012	E2	365	[M+H]+	InChI=1S/C15H12N2O/c16-15(18)17-13-7-3-1-5-11(13)9-10-12-6-2-4-8-14(12)17/h1-10H,(H2,16,18)	FFGPTBGBLSHEPO-UHFFFAOYSA-N	3	0.0621277	0.39984	0.402917	15.4195	Elbe	HMP/VMP
Carbamazepine	298-46-4	pos	2012	Mu	365	[M+H]+	InChI=1S/C15H12N2O/c16-15(18)17-13-7-3-1-5-11(13)9-10-12-6-2-4-8-14(12)17/h1-10H,(H2,16,18)	FFGPTBGBLSHEPO-UHFFFAOYSA-N	3	0.195425	0.482151	0.512219	38.1526	Mulde	HMP/VMP
Carbamazepine	298-46-4	pos	2012	R4	365	[M+H]+	InChI=1S/C15H12N2O/c16-15(18)17-13-7-3-1-5-11(13)9-10-12-6-2-4-8-14(12)17/h1-10H,(H2,16,18)	FFGPTBGBLSHEPO-UHFFFAOYSA-N	3	0.121546	0.429727	0.442178	27.488	Rhine	HMP/VMP
Carbamazepine	298-46-4	pos	2012	R3	365	[M+H]+	InChI=1S/C15H12N2O/c16-15(18)17-13-7-3-1-5-11(13)9-10-12-6-2-4-8-14(12)17/h1-10H,(H2,16,18)	FFGPTBGBLSHEPO-UHFFFAOYSA-N	3	0.0149418	0.153978	0.154465	9.67327	Rhine	HMP/VMP
Carbamazepine	298-46-4	pos	2012	Sa	365	[M+H]+	InChI=1S/C15H12N2O/c16-15(18)17-13-7-3-1-5-11(13)9-10-12-6-2-4-8-14(12)17/h1-10H,(H2,16,18)	FFGPTBGBLSHEPO-UHFFFAOYSA-N	3	0.212576	1.22044	1.23355	17.2328	Saale	HMP/VMP
Carbamazepine	298-46-4	pos	2012	S1	365	[M+H]+	InChI=1S/C15H12N2O/c16-15(18)17-13-7-3-1-5-11(13)9-10-12-6-2-4-8-14(12)17/h1-10H,(H2,16,18)	FFGPTBGBLSHEPO-UHFFFAOYSA-N	3	0.104163	0.314822	0.327409	31.8142	Saar	HMP/VMP
Carbamazepine	298-46-4	pos	2012	S2	365	[M+H]+	InChI=1S/C15H12N2O/c16-15(18)17-13-7-3-1-5-11(13)9-10-12-6-2-4-8-14(12)17/h1-10H,(H2,16,18)	FFGPTBGBLSHEPO-UHFFFAOYSA-N	3	0.0655854	0.576165	0.578748	11.3323	Saar	HMP/VMP
Carbamazepine	298-46-4	pos	2013	E5	365	[M+H]+	InChI=1S/C15H12N2O/c16-15(18)17-13-7-3-1-5-11(13)9-10-12-6-2-4-8-14(12)17/h1-10H,(H2,16,18)	FFGPTBGBLSHEPO-UHFFFAOYSA-N	3	0.0418617	0.224791	0.227335	18.4141	Elbe	HMP/VMP
Carbamazepine	298-46-4	pos	2013	E4	365	[M+H]+	InChI=1S/C15H12N2O/c16-15(18)17-13-7-3-1-5-11(13)9-10-12-6-2-4-8-14(12)17/h1-10H,(H2,16,18)	FFGPTBGBLSHEPO-UHFFFAOYSA-N	3	0.00620465	0.361814	0.361849	1.71471	Elbe	HMP/VMP
Carbamazepine	298-46-4	pos	2013	E1	365	[M+H]+	InChI=1S/C15H12N2O/c16-15(18)17-13-7-3-1-5-11(13)9-10-12-6-2-4-8-14(12)17/h1-10H,(H2,16,18)	FFGPTBGBLSHEPO-UHFFFAOYSA-N	3	0.0668919	0.183492	0.19057	35.101	Elbe	HMP/VMP
Carbamazepine	298-46-4	pos	2013	E2	365	[M+H]+	InChI=1S/C15H12N2O/c16-15(18)17-13-7-3-1-5-11(13)9-10-12-6-2-4-8-14(12)17/h1-10H,(H2,16,18)	FFGPTBGBLSHEPO-UHFFFAOYSA-N	3	0.048164	0.286045	0.288645	16.6863	Elbe	HMP/VMP
Carbamazepine	298-46-4	pos	2013	Mu	365	[M+H]+	InChI=1S/C15H12N2O/c16-15(18)17-13-7-3-1-5-11(13)9-10-12-6-2-4-8-14(12)17/h1-10H,(H2,16,18)	FFGPTBGBLSHEPO-UHFFFAOYSA-N	3	0.0464611	0.303458	0.305938	15.1864	Mulde	HMP/VMP
Carbamazepine	298-46-4	pos	2013	R4	365	[M+H]+	InChI=1S/C15H12N2O/c16-15(18)17-13-7-3-1-5-11(13)9-10-12-6-2-4-8-14(12)17/h1-10H,(H2,16,18)	FFGPTBGBLSHEPO-UHFFFAOYSA-N	3	0.0147189	0.399483	0.399664	3.68282	Rhine	HMP/VMP
Carbamazepine	298-46-4	pos	2013	R3	365	[M+H]+	InChI=1S/C15H12N2O/c16-15(18)17-13-7-3-1-5-11(13)9-10-12-6-2-4-8-14(12)17/h1-10H,(H2,16,18)	FFGPTBGBLSHEPO-UHFFFAOYSA-N	2	0.0192803	0.106712	0.107579	17.922	Rhine	HMP/VMP
Carbamazepine	298-46-4	pos	2013	Sa	365	[M+H]+	InChI=1S/C15H12N2O/c16-15(18)17-13-7-3-1-5-11(13)9-10-12-6-2-4-8-14(12)17/h1-10H,(H2,16,18)	FFGPTBGBLSHEPO-UHFFFAOYSA-N	3	0.039199	0.720328	0.72103	5.43652	Saale	HMP/VMP
Carbamazepine	298-46-4	pos	2013	S1	365	[M+H]+	InChI=1S/C15H12N2O/c16-15(18)17-13-7-3-1-5-11(13)9-10-12-6-2-4-8-14(12)17/h1-10H,(H2,16,18)	FFGPTBGBLSHEPO-UHFFFAOYSA-N	3	0.0767928	0.32506	0.331524	23.1636	Saar	HMP/VMP
Carbamazepine	298-46-4	pos	2013	S2	365	[M+H]+	InChI=1S/C15H12N2O/c16-15(18)17-13-7-3-1-5-11(13)9-10-12-6-2-4-8-14(12)17/h1-10H,(H2,16,18)	FFGPTBGBLSHEPO-UHFFFAOYSA-N	3	0.00865048	0.47363	0.473682	1.82622	Saar	HMP/VMP
Carbamazepine	298-46-4	pos	2014	D3	365	[M+H]+	InChI=1S/C15H12N2O/c16-15(18)17-13-7-3-1-5-11(13)9-10-12-6-2-4-8-14(12)17/h1-10H,(H2,16,18)	FFGPTBGBLSHEPO-UHFFFAOYSA-N	2	0.00228853	0.0525737	0.0525986	4.35094	Danube	HMP/VMP
Carbamazepine	298-46-4	pos	2014	E5	365	[M+H]+	InChI=1S/C15H12N2O/c16-15(18)17-13-7-3-1-5-11(13)9-10-12-6-2-4-8-14(12)17/h1-10H,(H2,16,18)	FFGPTBGBLSHEPO-UHFFFAOYSA-N	3	0.0258625	0.256762	0.257644	10.0381	Elbe	HMP/VMP
[truncated: 4,114 more rows]

## Sheet: annualSPM_temporaltrend_GAM_GLM
	GLM									Model diagnostics						GAM
[truncated: 146 more rows]

## Sheet: annualSPM_gain_loss_2006_2022
Substance	gain_0_to_1	loss_1_to_0	same_1_to_1	same_0_to_0
[truncated: 373 more rows]

[truncated: 4 more sheets: annualSPM_5th_WatchList, annualSPM_UWWTDindicators, annualSPM_presence_absence, annualSPM_azolefungicides]
