# Supplementary material for: A regulatory perspective on the systematic use of high-resolution mass spectrometry non-target screening data in environmental monitoring and chemicals management – use cases from the German NTSPortal
Source: Research Square preprint supplement (doi:10.21203/rs.3.rs-8436401/v1), 2025-12-31
Supplement: Supplementary file 2 [file e8c16f5588f18d5c85dcbe12.pdf]

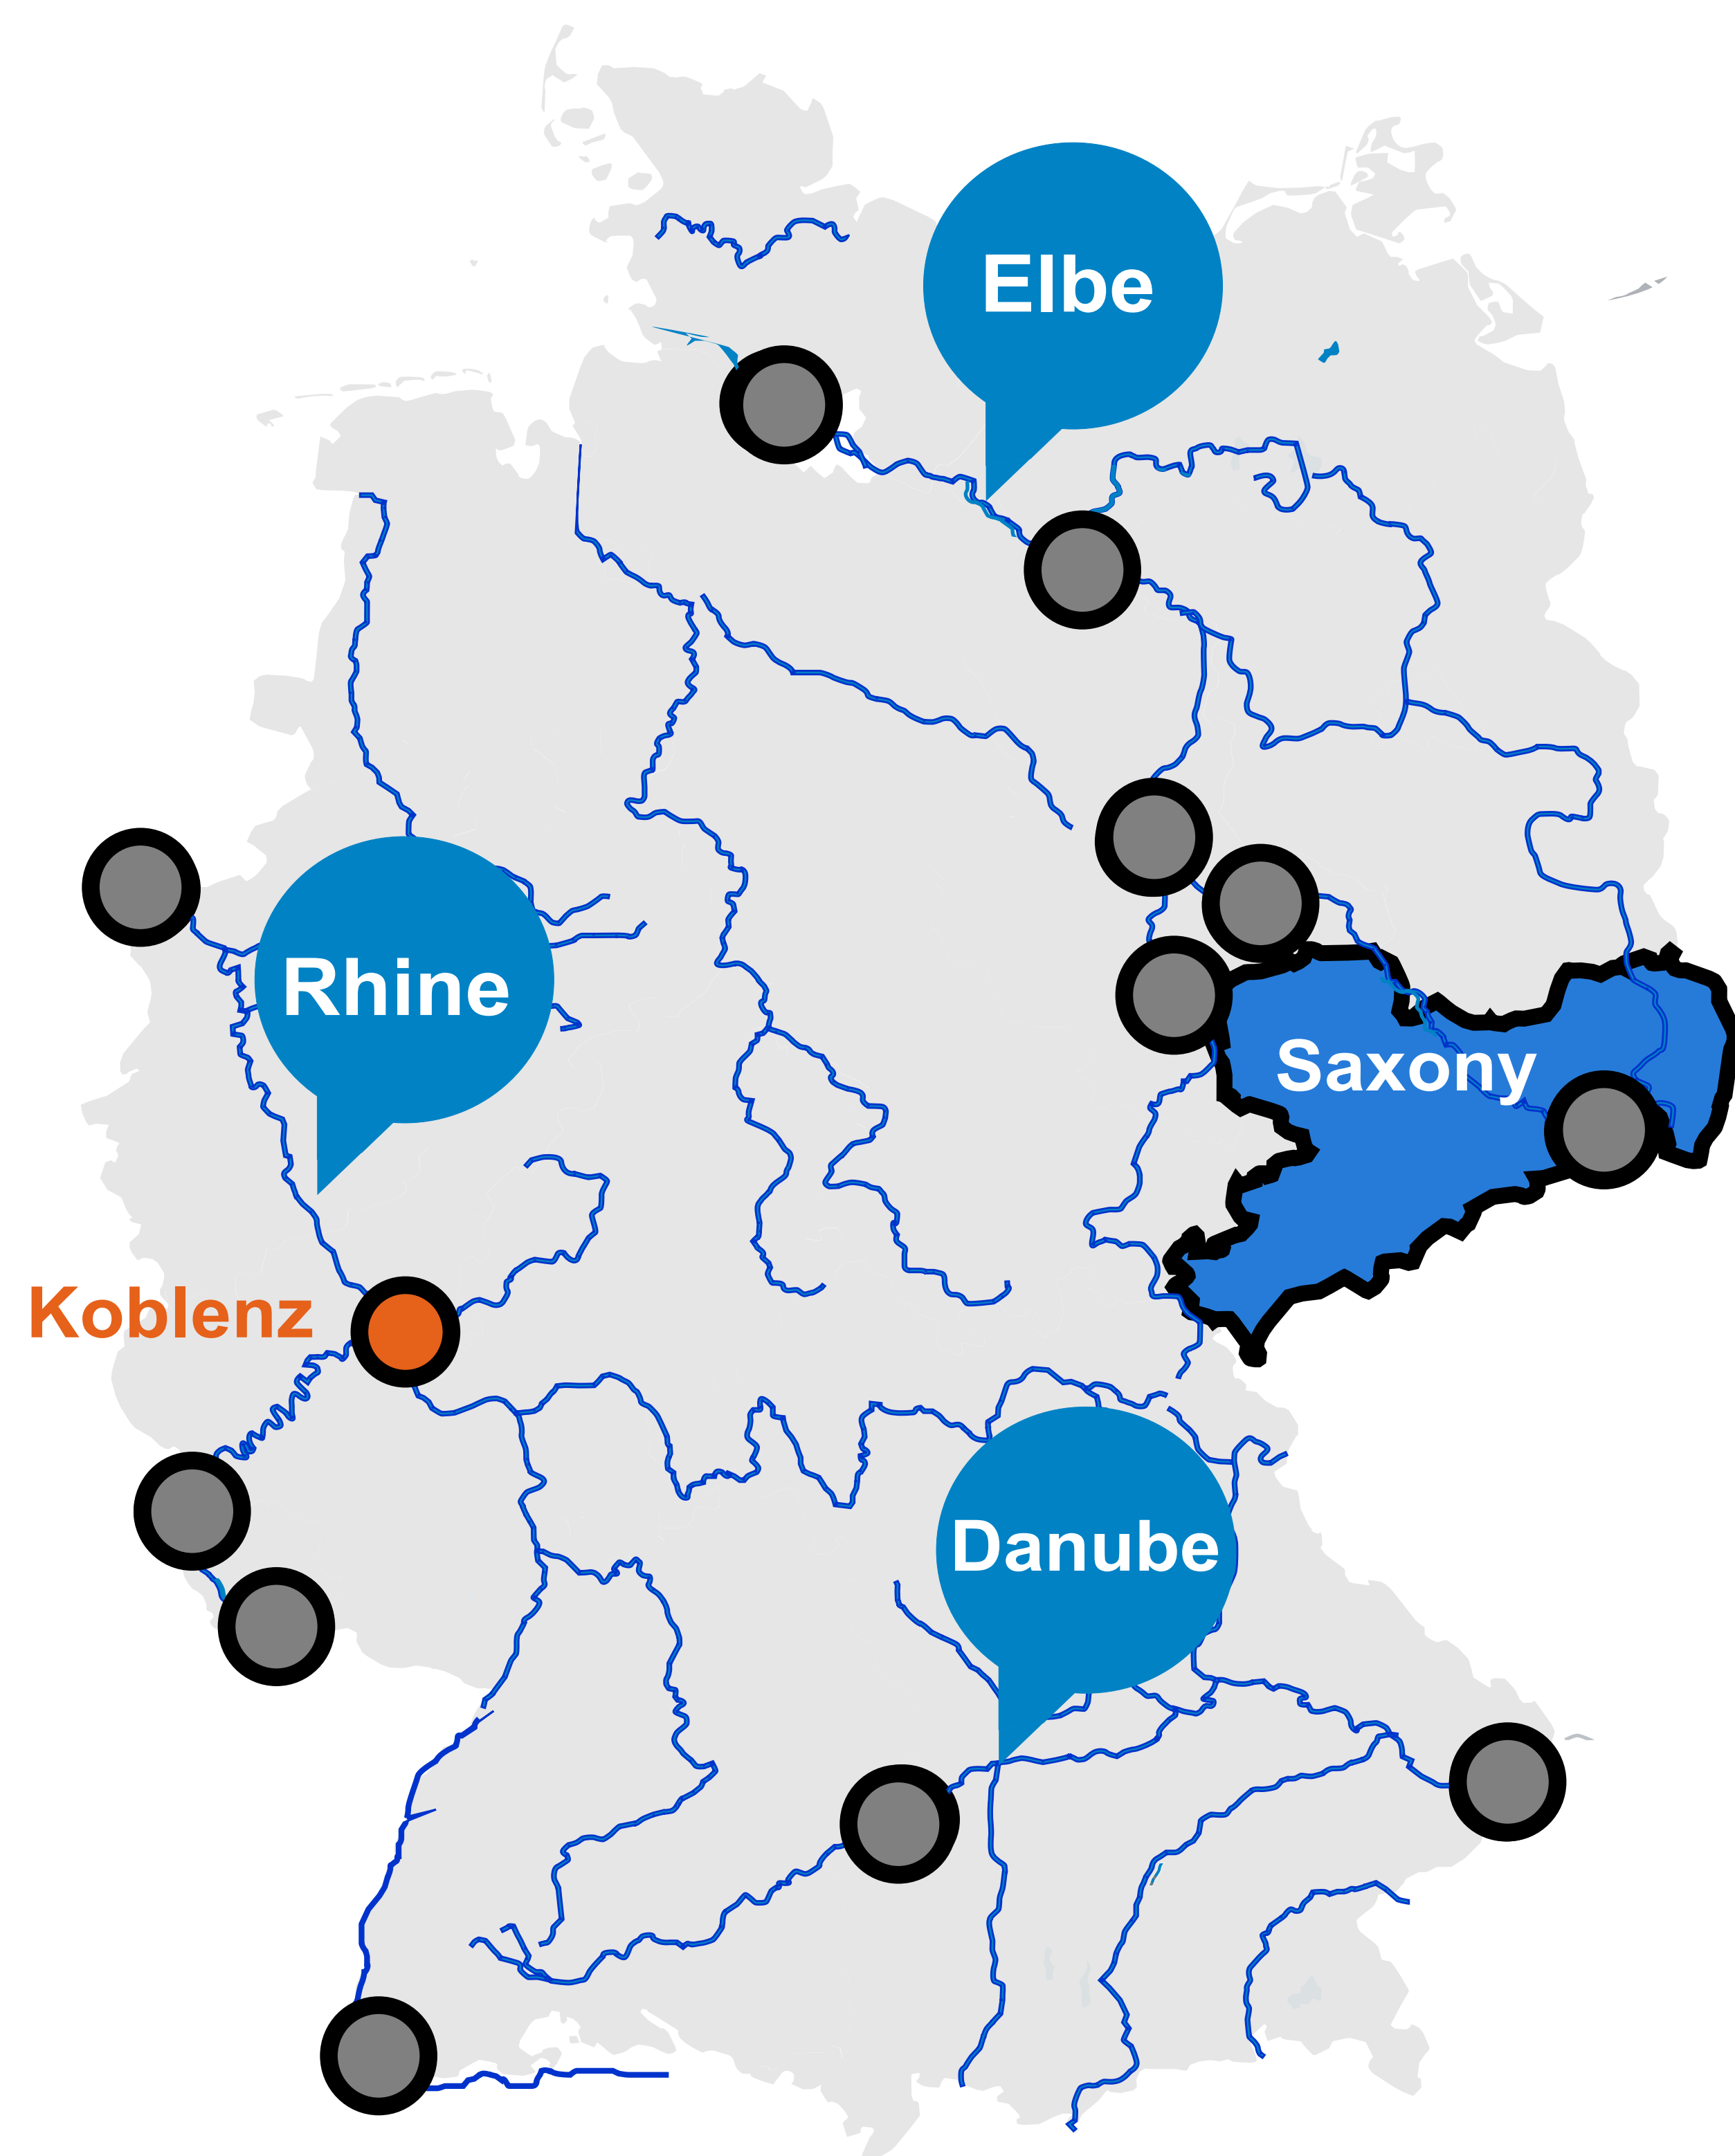

- Long-term samples
- Daily samples
- Regional samples

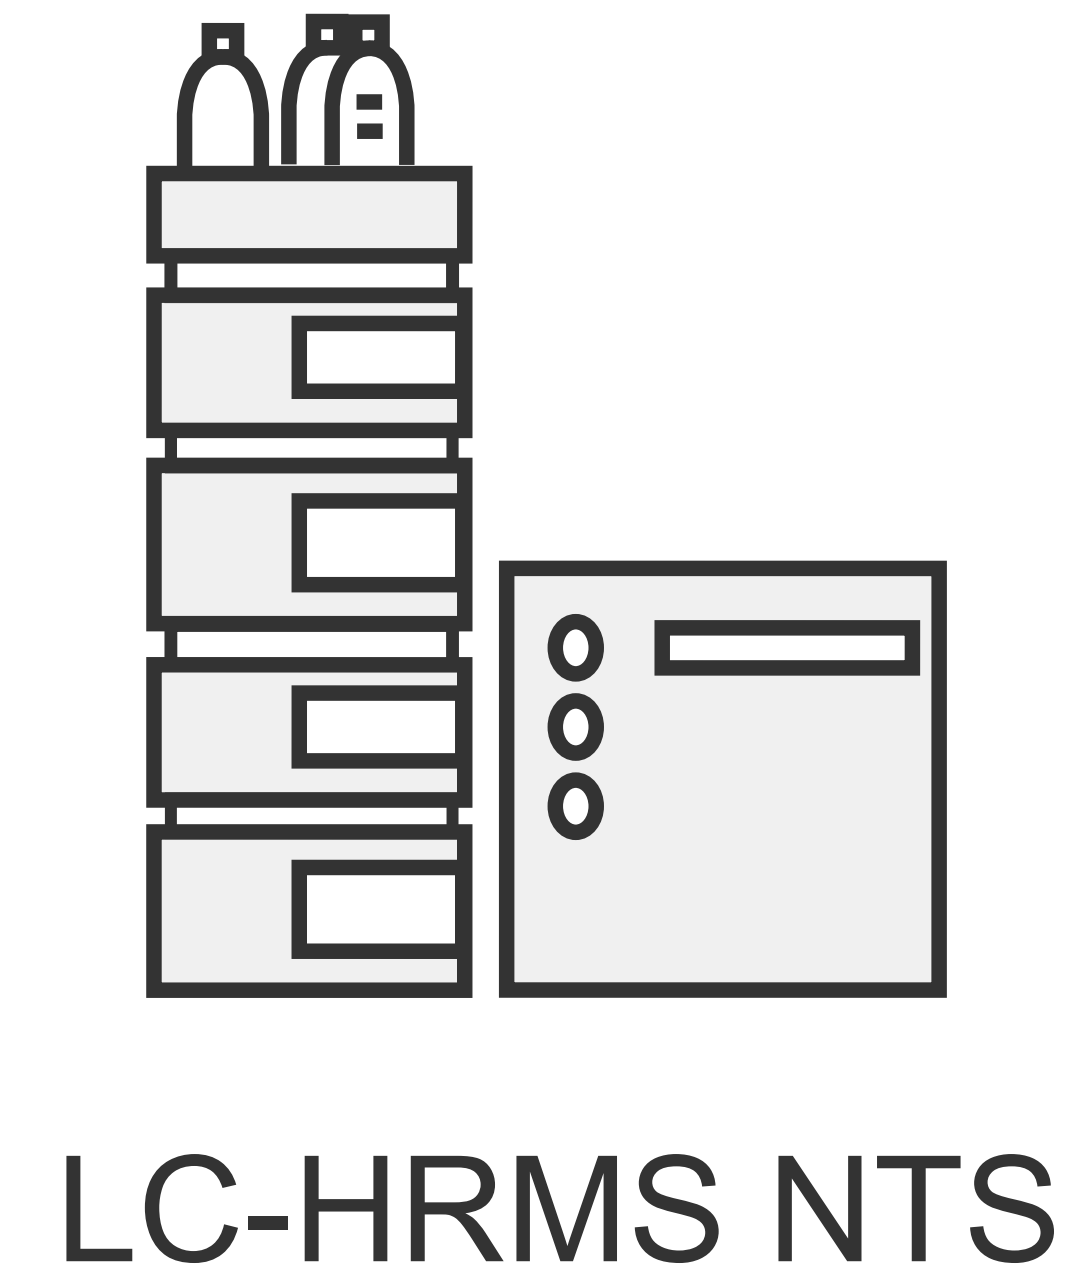

**NTSPortal** 🔍

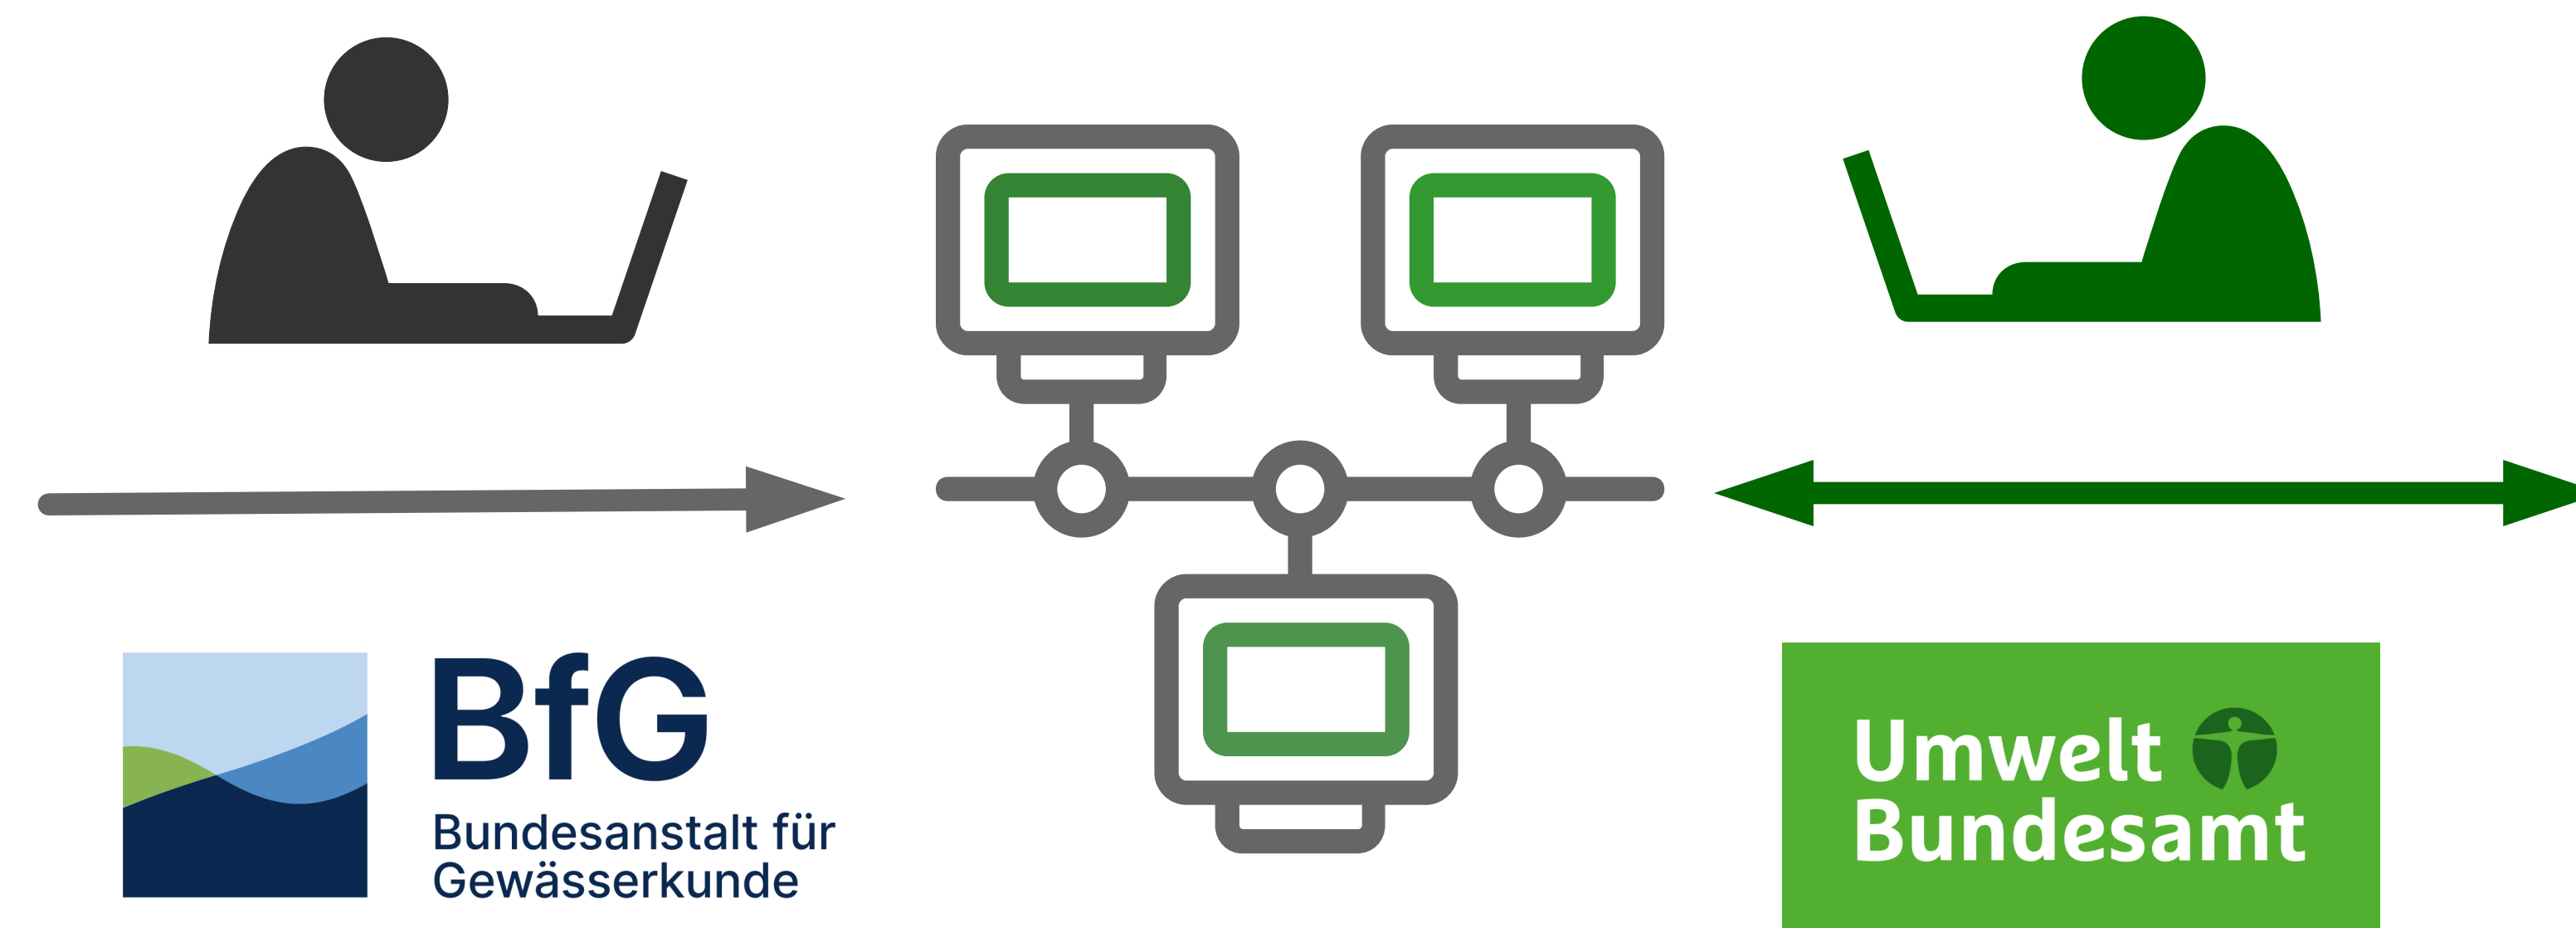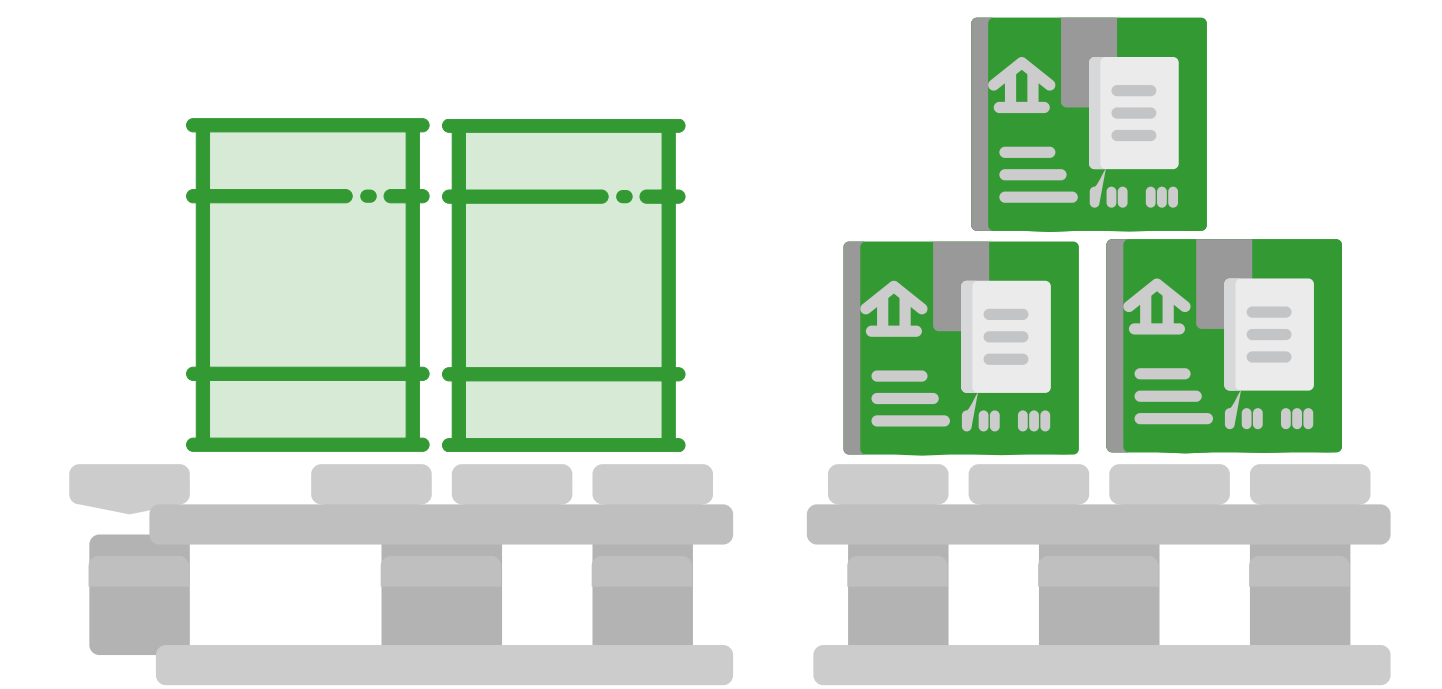

**Chemicals legislation**

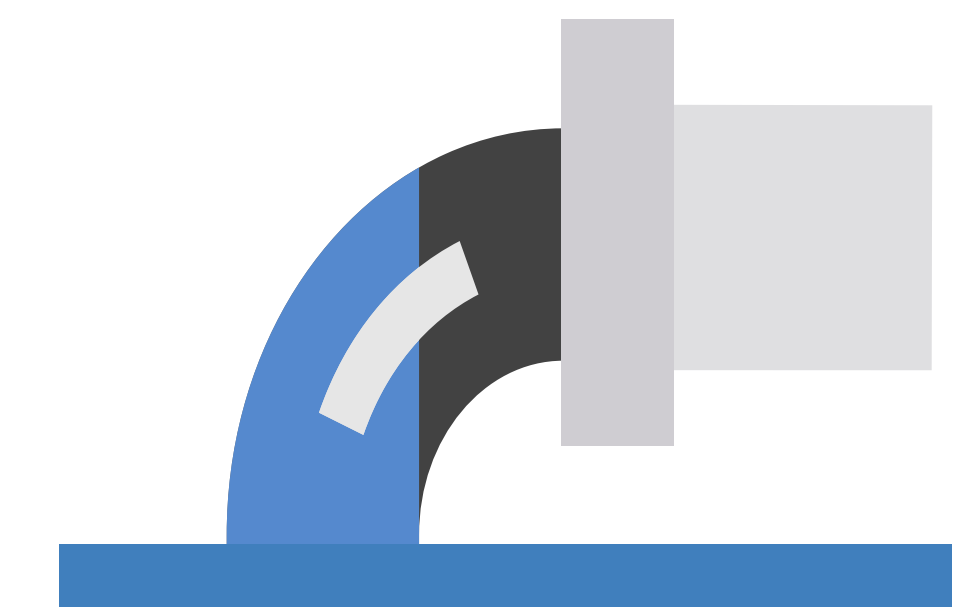

**Emissions legislation**

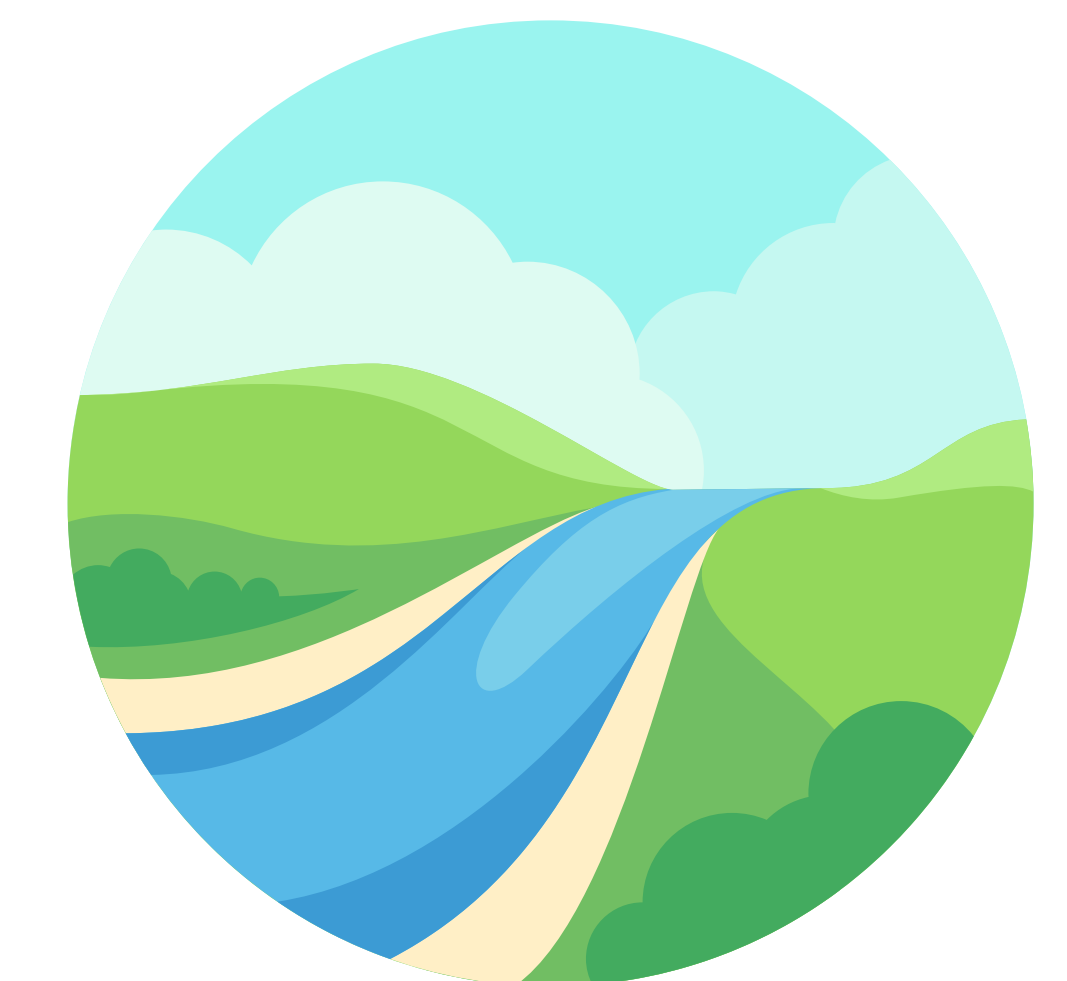

**Environmental legislation**
